# Supplementary material for: Inhibition gates supralinear Ca2+ signaling in Purkinje cell dendrites during practiced movements
Source: eLife. 2018 Aug 17;7:e36246. doi: 10.7554/eLife.36246 (PMC6120752; doi:10.7554/eLife.36246)
Supplement: Figure 1—figure supplement 1—source data 1. [file elife-36246-fig1-figsupp1-data1.xlsx]

## Sheet: Figure 1 Supp 1
Panel B		MLIs				PFs
	Time	Mouse 1	Mouse 2 S 1	Mouse 2 S 2		Mouse 1 F1	Mouse 1 F2	Mouse 1 F3	Mouse 1 F4	Mouse 1F5	Mouse 2 S1	Mouse 2 S1	Mouse 2 S2
	-0.9686	-0.00951257	0.0283016	-0.00655391		0.0509444	-0.0614048	0.00269293	-0.011809	-0.108625	-0.0275332	-0.00958368	-0.06958
	-0.9352	-0.00497678	-0.0253294	-0.00186057		0.0213808	-0.0836254	0.00699378	0.0111244	-0.101551	0.0528558	0.00808945	-0.0434591
	-0.9018	-0.00387719	0.00422707	-0.000184381		-0.0319979	-0.0624714	0.012164	0.00427862	-0.0959518	0.121042	0.0807657	-0.046836
	-0.8684	0.00162075	-0.0143324	0.00289981		0.0521762	-0.0470059	-0.000464074	0.00376519	-0.0686904	0.167841	0.102767	-0.0436578
	-0.835	0.00735922	-0.0106007	0.00169295		0.0308247	-0.0299406	0.0181577	0.0299504	-0.0617645	0.0738651	-0.0142725	-0.0661039
	-0.8016	0.00938658	0.0177339	0.0040061		0.0671633	-0.0646046	0.0356356	0.0568201	-0.0602909	-0.00992056	0.0719291	-0.0283627
	-0.7682	0.00948967	0.00033024	0.00524648		0.0722959	-0.0212301	0.0455642	0.0208797	-0.0314085	0.0778908	0.0412716	-0.0664018
	-0.7348	0.00516004	-0.0257257	0.00162591		0.0511497	-0.00505358	0.0502311	0.00068458	-0.0383344	-0.0368427	-0.0142725	-0.0537883
	-0.7014	0.00935222	-0.00409498	0.00266515		0.0427323	-0.0247854	0.028498	0.00290946	-0.0330295	-0.0186011	0.053715	-0.0279654
	-0.668	0.00993637	-0.0205409	0.00504534		0.103502	-0.0231855	0.0581007	0.057847	-0.0235985	0.023795	0.120801	-0.0252838
	-0.6346	0.0090086	-0.0211023	0.00289981		0.0618254	0.0285439	0.0934226	0.0657197	0.0259142	-0.00249811	-0.0328473	-0.0226022
	-0.6012	0.0137506	-0.0109309	0.00957106		0.0803027	-0.0233633	0.0984555	0.0809516	0.0144201	0.0714748	-0.0254534	-0.0136635
	-0.5678	0.0185956	-0.0487434	0.00886706		0.0991905	-0.0224745	0.103488	0.0610988	0.0331347	0.0490816	-0.0106657	-0.0575624
	-0.5344	0.011139	-0.0195172	0.00739201		-0.0200903	-0.0126974	0.0870628	0.0362827	0.0178094	0.0443011	0.0508296	-0.00611521
	-0.501	0.0110703	-0.0162148	0.00591696		0.111303	-0.0509168	0.0734739	0.0532261	-0.00621013	0.0235434	-0.102818	-0.0288593
	-0.4676	0.0169806	-0.00449127	0.00561525		0.0796868	0.0161004	0.0723301	0.0405614	0.0153043	-0.011556	0.0538953	-0.0241913
	-0.4342	0.0157436	-0.0359301	0.0135269		0.0277452	0.0203667	0.0642317	0.0557933	0.049639	-0.00753028	0.00790911	-0.011975
	-0.4008	0.0119981	-0.050956	0.0159406		0.00659901	-0.0301183	0.0100135	-0.00599007	0.000273667	0.043672	-0.0499794	0.0060017
	-0.3674	-0.00136876	0.0142664	0.0205334		-0.0623827	0.00827873	-0.0844222	-0.0682868	-0.0582279	-0.0607455	0.0879792	0.00788876
	-0.334	0.00141457	0.0284337	0.0237517		-0.0900985	-0.0231855	-0.101534	-0.0492897	-0.00768373	-0.0426297	-0.124098	0.0152384
	-0.3006	0.00701559	0.00627456	0.0183543		-0.0728531	0.0594748	-0.0340931	-0.026014	0.00690483	0.055246	0.127113	0.0358967
	-0.2672	0.00162075	0.0258578	0.0206339		-0.112066	0.0209	-0.0451197	0.0160876	0.0248826	0.248859	0.149114	-0.00422815
	-0.2338	-0.00325867	0.0232489	0.0229136		-0.127669	-0.00469805	-0.111829	-0.0698271	-0.0409869	0.142806	0.105111	0.0303348
	-0.2004	0.011517	0.0462666	0.0230812		-0.135881	0.00543451	-0.0546822	-0.024816	0.00985201	0.225585	0.106193	0.0146425
	-0.167	0.0283545	0.0737096	0.0241539		-0.071416	0.048809	0.0437798	0.06726	0.0872155	0.0544912	0.0207131	0.0103717
	-0.1336	0.0390411	0.0380106	0.0308252		0.0219967	0.0575194	0.0789186	0.0759884	0.0903101	0.147209	0.177788	0.0248723
	-0.1002	0.0379415	0.0140352	0.0323673		-0.0703895	0.0205445	0.0586497	0.037823	0.0524388	0.161928	0.0701257	0.00778944
	-0.0668	0.0508273	0.0790265	0.0348816		-0.107139	0.0916502	0.0322498	0.0470649	0.0493443	0.155512	0.153081	0.0471198
	-0.0334	0.0648126	0.0927314	0.0287802		-0.0348721	0.116537	0.105456	0.110731	0.122434	0.166457	0.258579	0.0297389
	0	0.0815126	0.093524	0.0304229		-0.0473956	0.122581	0.180034	0.127161	0.0973833	0.151864	0.270662	0.0253689
	0.0334	0.0861171	0.0946138	0.0338088		-0.0280971	0.119915	0.190375	0.121855	0.124055	0.0450559	0.213134	0.00927923
	0.0668	0.0878696	0.0652224	0.0386362		0.087283	0.130225	0.216271	0.173883	0.111088	0.0615362	0.18428	0.00550511
	0.1002	0.0952231	0.0819986	0.0363902		0.0521762	0.163289	0.279	0.214445	0.153232	0.186208	0.346223	0.0161322
	0.1336	0.0929208	0.0868531	0.0315627		0.118078	0.148357	0.321871	0.243026	0.115803	0.152744	0.295729	0.0180193
	0.167	0.101511	0.108022	0.0305905		0.060183	0.133425	0.334041	0.250214	0.200829	0.202185	0.234774	0.000936436
	0.2004	0.11261	0.115089	0.0287132		0.127317	0.142491	0.386063	0.298306	0.161337	0.182812	0.26435	-0.0159478
	0.2338	0.117799	0.0810739	0.0352168		0.145384	0.0745848	0.414431	0.338354	0.165169	0.290123	0.209707	-0.0253831
	0.2672	0.127936	0.0890658	0.0302888		0.114178	0.159201	0.43836	0.328941	0.199356	0.178031	0.286531	-0.0231981
	0.3006	0.133846	0.0653875	0.030624		0.0878989	0.100538	0.486447	0.35581	0.167674	0.190989	0.241808	0.000241203
	0.334	0.141131	0.0911793	0.0306911		0.0942633	0.0978719	0.516919	0.418621	0.186683	0.303206	0.344059	-0.0181328
	0.3674	0.134877	0.119085	0.031261		0.135529	0.102672	0.521952	0.426836	0.206282	0.22722	0.197264	-0.025681
	0.4008	0.138932	0.0806446	0.0311604		0.0614148	0.0840063	0.530233	0.399452	0.217628	0.150102	0.161918	-0.0438564
	0.4342	0.138932	0.0431294	0.0275399		0.123622	0.0850729	0.544463	0.420503	0.200682	0.168973	0.225216	-0.0323354
	0.4676	0.133537	0.0895941	0.024288		0.100833	0.0640967	0.549908	0.469451	0.157064	0.0595234	0.182837	-0.0467367
	0.501	0.132987	0.0677653	0.0267018		0.05813	0.0152115	0.53307	0.439843	0.129802	0.116639	0.201592	-0.0936152
	0.5344	0.119998	0.0379116	0.0231147		0.084614	0.0699629	0.513533	0.47835	0.100183	0.17325	0.276793	-0.0900397
	0.5678	0.112267	0.0485783	0.0238858		0.051355	0.0363655	0.479584	0.452678	0.12936	0.108964	0.237299	-0.0414728
	0.6012	0.102096	0.0574288	0.024288		0.0891307	-0.0375844	0.461191	0.427691	0.104751	0.131106	0.216741	-0.0596481
	0.6346	0.0914776	0.0659159	0.026333		0.0361626	0.00774544	0.430902	0.443094	0.0598067	0.199795	0.206101	-0.0987798
	0.668	0.0795196	-0.0244047	0.0216061		0.0741436	-0.0235411	0.388946	0.433852	0.0117677	0.132993	0.181214	-0.0685868
	0.7014	0.0682832	-0.00323635	0.0183878		0.0185066	-0.0366956	0.342231	0.415882	-0.00679957	0.117393	0.198707	-0.0888479
	0.7348	0.0629914	0.0307784	0.0153036		0.0532027	-0.0276296	0.338297	0.411432	-0.0291982	0.143686	0.160475	-0.0671964
	0.7682	0.0523048	0.00373171	0.0142644		0.0207649	-0.034918	0.311393	0.398425	-0.0393659	-0.00136587	0.231348	-0.0805051
	0.8016	0.0486281	0.0389683	0.0101074		0.0211755	-0.00203159	0.282797	0.36625	-0.0592594	0.0994033	0.126211	-0.111691
	0.835	0.0392472	0.0569994	0.0115154		0.0550504	0.0184113	0.265868	0.364025	-0.0731112	0.0651846	0.028648	-0.106626
	0.8684	0.0379758	0.00250982	0.0125547		0.0772231	-0.031896	0.265685	0.350163	-0.0851946	0.137648	0.0796836	-0.0966941
	0.9018	0.0348833	0.0442191	0.0104092		0.0219967	-0.00807558	0.254384	0.360774	-0.104057	0.110852	0.0618302	-0.0977866
	0.9352	0.0288355	-0.0471253	0.00789487		0.0616201	-0.0418508	0.250266	0.372754	-0.116582	0.113745	0.107636	-0.138011
	0.9686	0.0268769	-0.0224233	0.0112137		0.0708588	-0.00238712	0.217324	0.352387	-0.134118	0.0938679	0.249021	-0.106129
	1.002	0.0219631	-0.00861927	0.00645334		0.0899519	-0.0548276	0.195499	0.323635	-0.129402	0.0612846	0.150737	-0.0893445
	1.0354	0.0165339	-0.0249001	0.0112808		0.0412952	-0.00914216	0.189139	0.276057	-0.143696	0.0773876	0.149114	-0.0977866
	1.0688	0.0156061	-0.0226214	0.00936992		-0.00674566	-0.0642491	0.165256	0.245251	-0.201019	0.113116	0.155606	-0.108314
	1.1022	0.0100738	-0.0163799	0.00507886		-0.0377464	-0.0308294	0.144118	0.243026	-0.20205	0.00291147	0.146589	-0.0802072
	1.1356	0.00997073	-0.0290281	0.00286629		0.0355467	-0.0558942	0.144621	0.261167	-0.217228	0.0275691	0.140638	-0.128575
	1.169	0.00430099	-0.0443843	0.00323505		0.0170695	-0.0509168	0.155099	0.243197	-0.227396	0.0600266	0.159754	-0.112287
	1.2024	0.00162075	-0.050857	0.000184381		0.0293876	-0.0601605	0.126914	0.230019	-0.203966	0.0874519	0.13631	-0.088252
	1.2358	0.00701559	-0.0146296	0.00129067		0.0390368	-0.0368734	0.139771	0.259285	-0.202492	0.0226627	0.112144	-0.0886493
	1.2692	0.00289214	-0.0213996	-0.00353677		0.0651103	-0.0173193	0.121836	0.255006	-0.206176	0.0466913	0.0807657	-0.106328
	1.3026	-0.00308686	-0.0115254	-0.00172648		-0.01311	-0.0614048	0.114973	0.202807	-0.257457	0.119658	0.136851	-0.143076
	1.336	0.000349348	-0.0249001	-0.00534706		-0.00571915	-0.0347402	0.0919127	0.183467	-0.231375	0.0685813	0.160655	-0.14099
	1.3694	-0.00284633	-0.0236452	-0.00310096		-0.0280971	-0.0752705	0.0936971	0.155057	-0.244195	0.126325	0.0264839	-0.106328
	1.4028	-0.00521731	0.0441201	-0.00373791		0.0347255	-0.0893138	0.0968084	0.174568	-0.266594	0.0639265	0.0773392	-0.123411
	1.4362	-0.00879097	0.0126812	-0.0134263		0.00228766	-0.0631825	0.0960763	0.173541	-0.220028	0.0283239	0.0776999	-0.101759
	1.4696	-0.010028	0.00670387	-0.0127223		-0.00654036	-0.0800701	0.0755786	0.174568	-0.235943	0.0717264	0.172558	-0.125
	1.503	-0.0105434	-0.00214656	-0.0105768		-0.0418524	-0.072604	0.0723759	0.151977	-0.250532	0.140541	0.0318941	-0.121127
	1.5364	-0.00425517	0.0101384	-0.00970516		-0.00346082	-0.0662045	0.0662449	0.126476	-0.250679	0.118651	0.282203	-0.143175
	1.5698	-0.00861916	-0.0245699	-0.00896763		0.0686004	-0.119	0.0711863	0.112956	-0.269246	0.0626685	0.0946517	-0.130065
	1.6032	-0.0141858	-0.0163799	-0.00655391		0.0300035	-0.134821	0.0629963	0.118946	-0.282214	0.0684555	0.16859	-0.10027
	1.6366	-0.011162	-0.0236782	-0.0161082		0.0203543	-0.0919803	0.0540286	0.0939586	-0.264089	0.0319723	0.0892415	-0.114572
	1.67	-0.011265	-0.00564711	-0.0197623		0.0302088	-0.117934	0.058787	0.0765018	-0.29695	0.0939937	0.165705	-0.129271
	1.7034	-0.00965002	-0.0050857	-0.0167116		-0.0126994	-0.09518	0.0552182	0.0966969	-0.248026	0.0358722	0.113227	-0.123212
	1.7368	-0.0182405	0.00254285	-0.0137951		0.0183013	-0.0654934	0.0329819	0.079069	-0.245079	0.129471	0.0755359	-0.0999716
	1.7702	-0.0143576	-0.00303821	-0.0207345		-0.0512963	-0.097491	0.0301452	0.0823207	-0.273667	0.0956292	0.138654	-0.1542
	1.8036	-0.0106809	0.0159176	-0.0162758		0.0121422	-0.107801	0.0344003	0.0645216	-0.260994	0.100787	0.112144	-0.150922
	1.837	-0.0132924	0.0136719	-0.0224777		0.022202	-0.129311	0.0445576	0.0670888	-0.277056	0.0519751	0.15254	-0.134932
	1.8704	-0.0110932	-0.00544896	-0.015136		0.00844674	-0.0928691	0.0660618	0.0703406	-0.225923	0.123432	0.10421	-0.123411
	1.9038	-0.00696978	0.013705	-0.0187901		0.0185066	-0.122022	0.0689443	0.0823207	-0.234911	0.0377592	0.116833	-0.156285
	1.9372	-0.0134986	-0.0189228	-0.0186896		0.0178907	-0.125933	0.0460217	0.0670888	-0.262026	0.0864455	0.00340066	-0.130065
	1.9706	-0.0151136	-0.00683597	-0.0222096		-0.0186532	-0.123267	0.0285895	0.0421017	-0.280593	-0.0113044	0.137392	-0.141586
	2.004	-0.0144264	0.00379776	-0.019293		0.00126115	-0.141399	0.018661	0.0304638	-0.270572	0.0138564	0.0304514	-0.117551
	2.0374	-0.0108527	-0.0259238	-0.0135269		-0.0533494	-0.112423	0.0231906	0.0268698	-0.274256	-0.0329427	0.13649	-0.164032
	2.0708	-0.0123646	-0.00828903	-0.0142979		-0.0188585	-0.0942912	0.0158243	0.0403902	-0.228133	0.0196434	0.0863561	-0.138209
	2.1042	-0.0121928	-0.0138701	-0.0169463		-0.0278918	-0.0999797	0.0269882	0.0836899	-0.238448	0.0377592	0.238922	-0.133939
	2.1376	-0.00954694	-0.0367887	-0.0171139		-0.0248123	-0.10158	0.0226873	0.0349136	-0.240216	0.0820423	0.145868	-0.12798
	2.171	-0.00380847	-0.0173376	-0.0181867		-0.00633505	-0.109401	0.0350866	0.0443265	-0.243606	0.0406527	0.042534	-0.115068
	2.2044	0.000452434	-0.0242066	-0.0130911		0.0100892	-0.104779	0.0447406	0.0480917	-0.254216	0.0395205	0.140097	-0.151915
	2.2378	-0.00236526	0.00653875	-0.0142309		0.00454599	-0.164508	0.0479434	0.00479206	-0.229459	-0.0426297	0.128014	-0.121722
	2.2712	-0.00264015	0.0194511	-0.0176168		-0.0202956	-0.128777	0.0411718	-0.00804381	-0.253773	0.110222	-0.00255049	-0.126688
	2.3046	-0.0065918	-0.00706714	-0.0187901		-0.0810652	-0.1302	0.0341257	0.0172856	-0.229459	0.161551	0.0140406	-0.134932
	2.338	-0.00387719	-0.0252634	-0.0194606		0.0170695	-0.124511	0.0474858	0.00444977	-0.233733	0.108713	0.0773392	-0.139401
	2.3714	-0.00459879	-0.0128133	-0.0140633		-0.0549918	-0.0910915	0.0268967	0.0251583	-0.234175	0.0216563	0.0636336	-0.160457
	2.4048	-0.00312122	0.0292262	-0.0201981		-0.00140779	-0.114023	0.0270797	0.00581893	-0.233143	0.0860681	0.0957337	-0.136422
	2.4382	-0.000853325	-0.00452429	-0.0175833		-0.00900399	-0.0848697	0.0297791	0.00530549	-0.25952	0.0193918	0.0623712	-0.149929
	2.4716	0.00186128	0.0185595	-0.0158735		0.0102945	-0.0859363	0.024975	0.0159165	-0.212218	0.0600266	0.0899629	-0.146751
	2.505	-0.00422081	-0.0112282	-0.0115825		-0.0133153	-0.0976687	0.0276287	0.00581893	-0.206176	-0.0180978	0.107456	-0.117452
	2.5384	-0.00580147	-0.0376804	-0.0107779		-0.0126994	-0.0999797	0.00520939	0.0131782	-0.196893	0.00593077	0.16841	-0.133541
	2.5718	-0.00796628	0.0287639	-0.0133257		-0.033435	-0.0743816	-0.00947756	-0.00462091	-0.187904	0.0596492	0.0829297	-0.115167
	2.6052	-0.00573274	0.0120538	-0.00913525		-0.0299449	-0.0894916	-0.000967365	0.0198528	-0.177589	0.0107113	0.159573	-0.141586
	2.6386	-0.00398028	-0.0215977	-0.00678858		-0.000791882	-0.0713596	0.0171511	0.0147185	-0.210008	0.0971389	0.138113	-0.131754
	2.672	-0.000990774	-0.00861927	-0.0100069		0.0150164	-0.0788257	0.0250665	0.0195105	-0.175968	0.0421624	0.0217951	-0.148539
	2.7054	-0.00473624	-0.00746343	-0.0115154		0.0115263	-0.0646046	0.0112031	0.0148896	-0.131171	0.150228	0.105292	-0.112287
												Lick Rate
Panel E	Time	Mouse 3	Mouse 1					Mouse 2				Time
	-0.9686	0.0817517	0.0509444	-0.0614048	0.00269293	-0.011809	-0.108625	-0.0275332	-0.00958368	-0.06958		-0.137112	-0.136861	-0.317608	-0.198219
	-0.9352	0.179953	0.0213808	-0.0836254	0.00699378	0.0111244	-0.101551	0.0528558	0.00808945	-0.0434591		0	0	0	0
	-0.9018	0.104088	-0.0319979	-0.0624714	0.012164	0.00427862	-0.0959518	0.121042	0.0807657	-0.046836		0.123599	0.126263	0.324002	0.215905
	-0.8684	0.101392	0.0521762	-0.0470059	-0.000464074	0.00376519	-0.0686904	0.167841	0.102767	-0.0436578		0.243753	0.25514	0.466304	0.345854
	-0.835	0.11256	0.0308247	-0.0299406	0.0181577	0.0299504	-0.0617645	0.0738651	-0.0142725	-0.0661039		0.351566	0.382043	0.601123	0.463936
	-0.8016	0.0467074	0.0671633	-0.0646046	0.0356356	0.0568201	-0.0602909	-0.00992056	0.0719291	-0.0283627		0.454602	0.504873	0.762954	0.589051
	-0.7682	0.0147439	0.0722959	-0.0212301	0.0455642	0.0208797	-0.0314085	0.0778908	0.0412716	-0.0664018		0.559828	0.634396	0.955427	0.735107
	-0.7348	0.0540243	0.0511497	-0.00505358	0.0502311	0.00068458	-0.0383344	-0.0368427	-0.0142725	-0.0537883		0.669253	0.803318	1.16918	0.901281
	-0.7014	0.0721241	0.0427323	-0.0247854	0.028498	0.00290946	-0.0330295	-0.0186011	0.053715	-0.0279654		0.785012	1.09384	1.45379	1.10916
	-0.668	0.0497882	0.103502	-0.0231855	0.0581007	0.057847	-0.0235985	0.023795	0.120801	-0.0252838		0.910095	1.56234	1.85971	1.35361
	-0.6346	0.1141	0.0618254	0.0285439	0.0934226	0.0657197	0.0259142	-0.00249811	-0.0328473	-0.0226022		1.04442	2.23792	2.3269	1.69123
	-0.6012	0.0447819	0.0803027	-0.0233633	0.0984555	0.0809516	0.0144201	0.0714748	-0.0254534	-0.0136635		1.18542	3.04355	2.90705	2.14995
	-0.5678	0.0817517	0.0991905	-0.0224745	0.103488	0.0610988	0.0331347	0.0490816	-0.0106657	-0.0575624		1.33407	4.04408	3.52707	2.83419
	-0.5344	0.0509435	-0.0200903	-0.0126974	0.0870628	0.0362827	0.0178094	0.0443011	0.0508296	-0.00611521
	-0.501	-0.0326236	0.111303	-0.0509168	0.0734739	0.0532261	-0.00621013	0.0235434	-0.102818	-0.0288593		Rate
	-0.4676	0.0632668	0.0796868	0.0161004	0.0723301	0.0405614	0.0153043	-0.011556	0.0538953	-0.0241913		10.94	10.96	4.7228	7.5674
	-0.4342	0.0825219	0.0277452	0.0203667	0.0642317	0.0557933	0.049639	-0.00753028	0.00790911	-0.011975		12.815	13.21	3.5675	6.6386
	-0.4008	-0.0203004	0.00659901	-0.0301183	0.0100135	-0.00599007	0.000273667	0.043672	-0.0499794	0.0060017		12.136	11.88	4.6296	6.9475
	-0.3674	-0.0260769	-0.0623827	0.00827873	-0.0844222	-0.0682868	-0.0582279	-0.0607455	0.0879792	0.00788876		12.484	11.639	10.541	11.543
	-0.334	-0.0241514	-0.0900985	-0.0231855	-0.101534	-0.0492897	-0.00768373	-0.0426297	-0.124098	0.0152384		13.913	11.82	11.126	12.703
	-0.3006	-0.0426363	-0.0728531	0.0594748	-0.0340931	-0.026014	0.00690483	0.055246	0.127113	0.0358967		14.558	12.212	9.2689	11.989
	-0.2672	0.0155141	-0.112066	0.0209	-0.0451197	0.0160876	0.0248826	0.248859	0.149114	-0.00422815		14.255	11.581	7.7933	10.27
	-0.2338	0.0802113	-0.127669	-0.00469805	-0.111829	-0.0698271	-0.0409869	0.142806	0.105111	0.0303348		13.708	8.8798	7.0175	9.0267
	-0.2004	0.0478627	-0.135881	0.00543451	-0.0546822	-0.024816	0.00985201	0.225585	0.106193	0.0146425		12.958	5.1632	5.2704	7.2157
	-0.167	0.049018	-0.071416	0.048809	0.0437798	0.06726	0.0872155	0.0544912	0.0207131	0.0103717		11.992	3.2017	3.6953	6.1363
	-0.1336	0.0155141	0.0219967	0.0575194	0.0789186	0.0759884	0.0903101	0.147209	0.177788	0.0248723		11.167	2.2203	3.2107	4.4428
	-0.1002	-0.022611	-0.0703895	0.0205445	0.0586497	0.037823	0.0524388	0.161928	0.0701257	0.00778944		10.638	1.8619	2.5855	3.27
	-0.0668	0.05672	-0.107139	0.0916502	0.0322498	0.0470649	0.0493443	0.155512	0.153081	0.0471198		10.091	1.4992	2.4193	2.1922
	-0.0334	0.0108929	-0.0348721	0.116537	0.105456	0.110731	0.122434	0.166457	0.258579	0.0297389
	0	-0.00759201	-0.0473956	0.122581	0.180034	0.127161	0.0973833	0.151864	0.270662	0.0253689
	0.0334	0.0709688	-0.0280971	0.119915	0.190375	0.121855	0.124055	0.0450559	0.213134	0.00927923
	0.0668	0.0474776	0.087283	0.130225	0.216271	0.173883	0.111088	0.0615362	0.18428	0.00550511
	0.1002	0.0705837	0.0521762	0.163289	0.279	0.214445	0.153232	0.186208	0.346223	0.0161322
	0.1336	0.01898	0.118078	0.148357	0.321871	0.243026	0.115803	0.152744	0.295729	0.0180193
	0.167	0.0663476	0.060183	0.133425	0.334041	0.250214	0.200829	0.202185	0.234774	0.000936436
	0.2004	0.11333	0.127317	0.142491	0.386063	0.298306	0.161337	0.182812	0.26435	-0.0159478
	0.2338	0.143753	0.145384	0.0745848	0.414431	0.338354	0.165169	0.290123	0.209707	-0.0253831
	0.2672	0.185344	0.114178	0.159201	0.43836	0.328941	0.199356	0.178031	0.286531	-0.0231981
	0.3006	0.187655	0.0878989	0.100538	0.486447	0.35581	0.167674	0.190989	0.241808	0.000241203
	0.334	0.17148	0.0942633	0.0978719	0.516919	0.418621	0.186683	0.303206	0.344059	-0.0181328
	0.3674	0.240799	0.135529	0.102672	0.521952	0.426836	0.206282	0.22722	0.197264	-0.025681
	0.4008	0.272377	0.0614148	0.0840063	0.530233	0.399452	0.217628	0.150102	0.161918	-0.0438564
	0.4342	0.304341	0.123622	0.0850729	0.544463	0.420503	0.200682	0.168973	0.225216	-0.0323354
	0.4676	0.364031	0.100833	0.0640967	0.549908	0.469451	0.157064	0.0595234	0.182837	-0.0467367
	0.501	0.330913	0.05813	0.0152115	0.53307	0.439843	0.129802	0.116639	0.201592	-0.0936152
	0.5344	0.39638	0.084614	0.0699629	0.513533	0.47835	0.100183	0.17325	0.276793	-0.0900397
	0.5678	0.351708	0.051355	0.0363655	0.479584	0.452678	0.12936	0.108964	0.237299	-0.0414728
	0.6012	0.422182	0.0891307	-0.0375844	0.461191	0.427691	0.104751	0.131106	0.216741	-0.0596481
	0.6346	0.419101	0.0361626	0.00774544	0.430902	0.443094	0.0598067	0.199795	0.206101	-0.0987798
	0.668	0.522308	0.0741436	-0.0235411	0.388946	0.433852	0.0117677	0.132993	0.181214	-0.0685868
	0.7014	0.512681	0.0185066	-0.0366956	0.342231	0.415882	-0.00679957	0.117393	0.198707	-0.0888479
	0.7348	0.499587	0.0532027	-0.0276296	0.338297	0.411432	-0.0291982	0.143686	0.160475	-0.0671964
	0.7682	0.54811	0.0207649	-0.034918	0.311393	0.398425	-0.0393659	-0.00136587	0.231348	-0.0805051
	0.8016	0.62282	0.0211755	-0.00203159	0.282797	0.36625	-0.0592594	0.0994033	0.126211	-0.111691
	0.835	0.576223	0.0550504	0.0184113	0.265868	0.364025	-0.0731112	0.0651846	0.028648	-0.106626
	0.8684	0.630137	0.0772231	-0.031896	0.265685	0.350163	-0.0851946	0.137648	0.0796836	-0.0966941
	0.9018	0.648237	0.0219967	-0.00807558	0.254384	0.360774	-0.104057	0.110852	0.0618302	-0.0977866
	0.9352	0.666337	0.0616201	-0.0418508	0.250266	0.372754	-0.116582	0.113745	0.107636	-0.138011
	0.9686	0.636299	0.0708588	-0.00238712	0.217324	0.352387	-0.134118	0.0938679	0.249021	-0.106129
	1.002	0.69753	0.0899519	-0.0548276	0.195499	0.323635	-0.129402	0.0612846	0.150737	-0.0893445
	1.0354	0.677505	0.0412952	-0.00914216	0.189139	0.276057	-0.143696	0.0773876	0.149114	-0.0977866
	1.0688	0.677505	-0.00674566	-0.0642491	0.165256	0.245251	-0.201019	0.113116	0.155606	-0.108314
	1.1022	0.697915	-0.0377464	-0.0308294	0.144118	0.243026	-0.20205	0.00291147	0.146589	-0.0802072
	1.1356	0.720251	0.0355467	-0.0558942	0.144621	0.261167	-0.217228	0.0275691	0.140638	-0.128575
	1.169	0.75568	0.0170695	-0.0509168	0.155099	0.243197	-0.227396	0.0600266	0.159754	-0.112287
	1.2024	0.782637	0.0293876	-0.0601605	0.126914	0.230019	-0.203966	0.0874519	0.13631	-0.088252
	1.2358	0.73681	0.0390368	-0.0368734	0.139771	0.259285	-0.202492	0.0226627	0.112144	-0.0886493
	1.2692	0.764923	0.0651103	-0.0173193	0.121836	0.255006	-0.206176	0.0466913	0.0807657	-0.106328
	1.3026	0.704847	-0.01311	-0.0614048	0.114973	0.202807	-0.257457	0.119658	0.136851	-0.143076
	1.336	0.751059	-0.00571915	-0.0347402	0.0919127	0.183467	-0.231375	0.0685813	0.160655	-0.14099
	1.3694	0.766078	-0.0280971	-0.0752705	0.0936971	0.155057	-0.244195	0.126325	0.0264839	-0.106328
	1.4028	0.830005	0.0347255	-0.0893138	0.0968084	0.174568	-0.266594	0.0639265	0.0773392	-0.123411
	1.4362	0.750289	0.00228766	-0.0631825	0.0960763	0.173541	-0.220028	0.0283239	0.0776999	-0.101759
	1.4696	0.8508	-0.00654036	-0.0800701	0.0755786	0.174568	-0.235943	0.0717264	0.172558	-0.125
	1.503	0.781482	-0.0418524	-0.072604	0.0723759	0.151977	-0.250532	0.140541	0.0318941	-0.121127
	1.5364	0.883919	-0.00346082	-0.0662045	0.0662449	0.126476	-0.250679	0.118651	0.282203	-0.143175
	1.5698	0.79188	0.0686004	-0.119	0.0711863	0.112956	-0.269246	0.0626685	0.0946517	-0.130065
	1.6032	0.809595	0.0300035	-0.134821	0.0629963	0.118946	-0.282214	0.0684555	0.16859	-0.10027
	1.6366	0.816141	0.0203543	-0.0919803	0.0540286	0.0939586	-0.264089	0.0319723	0.0892415	-0.114572
	1.67	0.833086	0.0302088	-0.117934	0.058787	0.0765018	-0.29695	0.0939937	0.165705	-0.129271
	1.7034	0.737195	-0.0126994	-0.09518	0.0552182	0.0966969	-0.248026	0.0358722	0.113227	-0.123212
	1.7368	0.739506	0.0183013	-0.0654934	0.0329819	0.079069	-0.245079	0.129471	0.0755359	-0.0999716
	1.7702	0.700226	-0.0512963	-0.097491	0.0301452	0.0823207	-0.273667	0.0956292	0.138654	-0.1542
	1.8036	0.711394	0.0121422	-0.107801	0.0344003	0.0645216	-0.260994	0.100787	0.112144	-0.150922
	1.837	0.712549	0.022202	-0.129311	0.0445576	0.0670888	-0.277056	0.0519751	0.15254	-0.134932
	1.8704	0.732574	0.00844674	-0.0928691	0.0660618	0.0703406	-0.225923	0.123432	0.10421	-0.123411
	1.9038	0.815371	0.0185066	-0.122022	0.0689443	0.0823207	-0.234911	0.0377592	0.116833	-0.156285
	1.9372	0.77224	0.0178907	-0.125933	0.0460217	0.0670888	-0.262026	0.0864455	0.00340066	-0.130065
	1.9706	0.814601	-0.0186532	-0.123267	0.0285895	0.0421017	-0.280593	-0.0113044	0.137392	-0.141586
	2.004	0.802278	0.00126115	-0.141399	0.018661	0.0304638	-0.270572	0.0138564	0.0304514	-0.117551
	2.0374	0.837707	-0.0533494	-0.112423	0.0231906	0.0268698	-0.274256	-0.0329427	0.13649	-0.164032
	2.0708	0.81152	-0.0188585	-0.0942912	0.0158243	0.0403902	-0.228133	0.0196434	0.0863561	-0.138209
	2.1042	0.758761	-0.0278918	-0.0999797	0.0269882	0.0836899	-0.238448	0.0377592	0.238922	-0.133939
	2.1376	0.709853	-0.0248123	-0.10158	0.0226873	0.0349136	-0.240216	0.0820423	0.145868	-0.12798
	2.171	0.752599	-0.00633505	-0.109401	0.0350866	0.0443265	-0.243606	0.0406527	0.042534	-0.115068
	2.2044	0.756065	0.0100892	-0.104779	0.0447406	0.0480917	-0.254216	0.0395205	0.140097	-0.151915
	2.2378	0.798812	0.00454599	-0.164508	0.0479434	0.00479206	-0.229459	-0.0426297	0.128014	-0.121722
	2.2712	0.732959	-0.0202956	-0.128777	0.0411718	-0.00804381	-0.253773	0.110222	-0.00255049	-0.126688
	2.3046	0.781097	-0.0810652	-0.1302	0.0341257	0.0172856	-0.229459	0.161551	0.0140406	-0.134932
	2.338	0.702921	0.0170695	-0.124511	0.0474858	0.00444977	-0.233733	0.108713	0.0773392	-0.139401
	2.3714	0.657864	-0.0549918	-0.0910915	0.0268967	0.0251583	-0.234175	0.0216563	0.0636336	-0.160457
	2.4048	0.721021	-0.00140779	-0.114023	0.0270797	0.00581893	-0.233143	0.0860681	0.0957337	-0.136422
	2.4382	0.719096	-0.00900399	-0.0848697	0.0297791	0.00530549	-0.25952	0.0193918	0.0623712	-0.149929
	2.4716	0.695989	0.0102945	-0.0859363	0.024975	0.0159165	-0.212218	0.0600266	0.0899629	-0.146751
	2.505	0.637839	-0.0133153	-0.0976687	0.0276287	0.00581893	-0.206176	-0.0180978	0.107456	-0.117452
	2.5384	0.587006	-0.0126994	-0.0999797	0.00520939	0.0131782	-0.196893	0.00593077	0.16841	-0.133541
	2.5718	0.654398	-0.033435	-0.0743816	-0.00947756	-0.00462091	-0.187904	0.0596492	0.0829297	-0.115167
	2.6052	0.592012	-0.0299449	-0.0894916	-0.000967365	0.0198528	-0.177589	0.0107113	0.159573	-0.141586
	2.6386	0.586235	-0.000791882	-0.0713596	0.0171511	0.0147185	-0.210008	0.0971389	0.138113	-0.131754
	2.672	0.498047	0.0150164	-0.0788257	0.0250665	0.0195105	-0.175968	0.0421624	0.0217951	-0.148539
	2.7054	0.478792	0.0115263	-0.0646046	0.0112031	0.0148896	-0.131171	0.150228	0.105292	-0.112287
