# Supplementary material for: Inhibition gates supralinear Ca2+ signaling in Purkinje cell dendrites during practiced movements
Source: eLife. 2018 Aug 17;7:e36246. doi: 10.7554/eLife.36246 (PMC6120752; doi:10.7554/eLife.36246)
Supplement: Figure 1—figure supplement 2—source data 1. [file elife-36246-fig1-figsupp2-data1.xlsx]

## Sheet: Figure 1 Supp 2
Panel A		Movement								No Movement
		Mouse 1	Mouse 2	Mouse 3	Mouse 4	Mouse 5	Mouse 6	Mouse 7		Mouse 1	Mouse 2	Mouse 3	Mouse 4	Mouse 5	Mouse 6	Mouse 7
	Single	541	632	97	3521	1092	2217	1240		819	497	157	1907	745	2508	629
	Double	166	282	22	1323	413	848	460		319	184	41	800	298	827	268
	Triple	61	86	8	387	145	246	190		102	76	12	279	97	308	100
Panel B		Movement								No Movement
	Time	Mouse 1	Mouse 2	Mouse 3	Mouse 4	Mouse 5	Mouse 6	Mouse 7		Mouse 1	Mouse 2	Mouse 3	Mouse 4	Mouse 5	Mouse 6	Mouse 7
	-0.2338	-0.00364688	0.00352138	-0.012277	-0.00406406	0.00306025	0.00144922	0.00152359		0.00160467	0.0168075	-0.0368347	0.0131667	0.00256502	0.00167529	0.0204712
	-0.2004	-0.000898335	-0.00525252	-0.0209724	0.00149509	-0.00767127	-0.00565822	0.0125904		-0.0111204	-0.0141481	0.000750698	0.00237347	-0.00217894	0.00729772	-0.0114728
	-0.167	-0.00892003	0.00638069	0.000526911	-0.00104475	-0.00195802	0.000972638	0.00188546		0.00398658	4.12931e-05	-0.0146901	0.00848801	-0.00820751	0.00844372	-0.00348567
	-0.1336	-0.0199566	0.00668896	-0.00918455	0.0018985	0.0013465	0.00940422	-0.00429549		-0.00441558	0.0050063	0.0018072	-0.00839366	-0.0180988	-0.00180954	-0.0278043
	-0.1002	-0.00407892	-0.00427917	0.0176077	-0.00101085	0.00118869	0.00184147	0.00438494		0.00229728	-0.0195053	-0.00131853	0.00118447	0.0078009	-0.00122126	-0.0205786
	-0.0668	0.00691375	-0.00213038	-0.00445247	-9.63067e-05	-0.000737483	-0.00369027	0.00255242		-0.00130735	0.00613595	0.0395558	-0.0130918	0.00423205	-0.00468377	0.00409189
	-0.0334	-0.00504074	-0.00203056	0.00116589	0.00566601	0.000197171	0.000741638	-0.0193762		-0.000887749	-0.00796348	-0.0581458	-0.00629608	-0.0120509	-0.00342958	0.00330014
	0	0.231399	0.261966	0.1532	0.223825	0.233406	0.235165	0.18911		0.183878	0.248593	0.190603	0.184464	0.294601	0.206123	0.206969
	0.0334	0.189383	0.220209	0.114987	0.194545	0.199808	0.190603	0.14931		0.14629	0.18928	0.132602	0.153458	0.25227	0.167589	0.157621
	0.0668	0.146461	0.157562	0.0475654	0.15487	0.155073	0.142989	0.109247		0.12123	0.141517	0.105532	0.0986314	0.183017	0.117714	0.11306
	0.1002	0.0910734	0.114591	0.0546142	0.115895	0.115024	0.0980979	0.0596735		0.0890307	0.0841193	0.109158	0.0759443	0.128201	0.0847883	0.0775538
	0.1336	0.0673397	0.0737062	0.0595533	0.0884301	0.087267	0.0691984	0.0397512		0.0612719	0.0471624	0.0503261	0.054715	0.0798079	0.0613892	0.0509101
	0.167	0.196397	0.218036	0.147027	0.210494	0.212599	0.178824	0.159937		0.139127	0.14524	0.0691865	0.144758	0.179359	0.150476	0.131674
	0.2004	0.259997	0.310829	0.206697	0.296548	0.338753	0.295743	0.240356		0.265786	0.371119	0.172714	0.239179	0.307632	0.259966	0.209396
	0.2338	0.238696	0.264459	0.150763	0.25732	0.286223	0.253155	0.189916		0.229077	0.280235	0.159013	0.2107	0.262126	0.21009	0.172949
	0.2672	0.19161	0.21334	0.148717	0.211373	0.254903	0.209051	0.163566		0.178763	0.228499	0.0725907	0.167319	0.201393	0.155137	0.141047
	0.3006	0.17236	0.203016	0.07943	0.17574	0.218546	0.176528	0.122727		0.155083	0.170201	0.0889221	0.130044	0.155744	0.107604	0.159589
	0.334	0.14536	0.160829	0.0730035	0.146857	0.195563	0.158573	0.113574		0.143184	0.172687	0.0348029	0.111028	0.195093	0.0936475	0.12694
	0.3674	0.106959	0.12341	0.145694	0.125987	0.159652	0.130954	0.102866		0.127745	0.26068	0.0143461	0.0991657	0.16712	0.0534519	0.0960532
	0.4008	0.0779235	0.104597	0.0727248	0.10852	0.127852	0.112039	0.0824549		0.12662	0.238448	-0.0173689	0.088258	0.19372	0.0469918	0.0520736
	0.4342	0.0691431	0.101528	0.064393	0.0916722	0.109978	0.0893564	0.0808582		0.122281	0.189736	0.0205208	0.0756888	0.163725	0.0454768	0.0443434
	0.4676	0.0739953	0.124286	0.0590649	0.0793606	0.0899801	0.0719753	0.0775732		0.109073	0.158793	-0.0311656	0.0664245	0.175973	0.0519237	0.0568685
	0.5	0.0658665	0.137547	0.0102332	0.0674831	0.070534	0.059139	0.0810903		0.093473	0.1365	-0.00192267	0.062365	0.122654	0.0713824	0.0350786
Panel C		Movement								No Movement
		Mouse 1	Mouse 2	Mouse 3	Mouse 4	Mouse 5	Mouse 6	Mouse 7		Mouse 1	Mouse 2	Mouse 3	Mouse 4	Mouse 5	Mouse 6	Mouse 7
		0.4591	0.20628	0.20628	0.554	0.38787	0.61907	0.49011		0.55293	0.285	0.285	1.0447	0.40551	1.0145	0.44193
		0.62166	0.20628	0.20628	0.48052	0.29541	0.4084	0.60838		0.4979	0.27001	0.27001	0.42526	0.30983	1.5864	2.0596
		1.7397	0.18156	0.18156	0.52229	0.27819	0.72524	0.69776		0.88663	0.83965	0.83965	0.49109	0.30965	0.22473	0.65978
		1.0183	0.38298	0.38298	0.79586	0.23258	0.25857	0.65515		0.75561	0.63141	0.63141	0.4716	0.61297	0.35262	0.66671
		1.0307	0.22996	0.22996	0.50148	0.29103	0.23749	0.42598		0.88325	0.63141	0.63141	0.97315	0.58801	0.79966	0.52369
		0.91655	0.20351	0.20351	0.4966	0.3151	0.34513	0.60801		0.89182	0.24315	0.24315	0.68074	0.48698	0.25468	0.60966
		0.60272	0.26344	0.26344	0.43837	0.3151	0.34032	1.4441		0.60806	0.1777	0.1777	0.9092	0.40724	0.34255	0.88229
		0.66415	0.26462	0.26462	1.0453	0.23521	0.42135	0.69636		0.53385	0.23428	0.23428	0.66338	0.3394	0.36775	0.57813
		0.45863	0.26539	0.26539	0.51102	0.27381	0.39554	0.89873		0.94579	0.21793	0.21793	0.66338	0.3532	0.40938	0.35092
		1.1449	0.19376	0.19376	0.57523	0.30385	0.24357	0.57295		1.61	0.18332	0.18332	0.44902	0.34412	0.34401	1.5471
		2.4089	0.35624	0.35624	0.57298	0.23211	0.40101	0.63718		1.0002	0.17375	0.17375	0.57883	0.2867	0.37594	0.48542
		0.83583	0.49311	0.49311	0.60264	0.23687	0.44626	0.96388		0.84141	0.16855	0.16855	0.35569	0.26203	0.44435	0.50341
		1.7018	0.76206	0.76206	0.64725	0.32552	0.39763	0.89728		1.1124	0.22196	0.22196	0.41981	0.45975	0.37484	0.50341
		1.1382	0.23927	0.23927	1.0609	0.31166	0.60017	0.36819		0.45166	0.18929	0.18929	0.52573	0.39441	0.23367	0.74766
		0.58661	0.31077	0.31077	0.39644	0.40998	0.47617	0.56172		0.94701	0.57136	0.57136	0.36534	0.32988	0.63025	0.54015
		0.89713	0.22867	0.22867	0.38787	0.35722	0.40069	0.40628		0.31563	0.57136	0.57136	0.48464	0.32776	0.63025	0.58092
		0.89713	0.34873	0.34873	0.3484	0.29483	0.749	0.49052		0.25878	0.49604	0.49604	0.39563	0.28069	0.46888	0.46495
		0.57328	0.21659	0.21659	0.43792	0.2951	0.59768	0.43598		0.28869	0.24213	0.24213	0.51867	0.16229	0.33842	0.41228
		0.59918	0.25792	0.25792	0.87226	0.30616	0.39275	0.50895		0.36029	0.57988	0.57988	0.7764	0.20063	0.3513	0.56941
		2.1589	0.24664	0.24664	0.59771	0.34256	0.40613	0.54318		0.17698	0.55942	0.55942	0.37795	0.48993	0.25236	0.39521
		0.61126	0.23649	0.23649	0.58253	0.34256	0.40921	0.66431		0.21027	0.31196	0.31196	0.53175	0.52218	0.26205	0.71117
		1.0886	0.22047	0.22047	0.60203	0.5024	0.43032	0.55458		0.56727	0.75652	0.75652	0.42052	0.59372	0.25965	0.54923
		1.0249	0.22791	0.22791	0.77342	0.55147	0.47948	0.31071		0.41757	0.39338	0.39338	0.32	0.44203	0.26489	0.42499
		1.7901	0.32087	0.32087	0.4128	0.61933	0.46069	0.7314		0.48126	0.14963	0.14963	0.55892	0.49137	0.59289	0.68242
		1.3038	0.29197	0.29197	0.61029	0.3858	0.60155	0.46647		0.42105	0.49112	0.49112	0.34364	0.3519	1.4324	0.98955
		0.76559	0.18523	0.18523	0.58289	0.251	0.51765	0.46647		0.52606	0.2963	0.2963	0.27927	0.51176	1.4277	0.77396
		0.66527	0.14569	0.14569	0.66122	0.23241	0.52209	0.55295		0.27508	0.60618	0.60618	0.31041	0.67036	0.68064	0.53638
		0.55615	0.26151	0.26151	0.29269	0.235	0.6506	0.50861		0.33183	0.22542	0.22542	0.32417	0.5506	0.38449	0.54375
		1.2411	0.25995	0.25995	0.56077	0.28619	0.4306	0.50376		0.69868	0.17413	0.17413	0.33226	0.42225	0.46593	0.54375
		0.68601	0.33929	0.33929	0.43804	0.26206	0.89948	0.51335		0.42441	0.23273	0.23273	0.37531	0.45921	0.49547	0.49483
		0.77627	0.42377	0.42377	0.32444	0.31529	0.60844	0.48826		0.51849	0.19837	0.19837	0.35988	0.41451	0.64301	0.57965
		0.80378	0.24281	0.24281	0.41129	0.28263	0.39239	0.63751		1.4519	0.20094	0.20094	0.48963	0.32602	0.34734	0.57965
		0.77406	0.28176	0.28176	0.45933	0.32765	0.31174	0.49483		0.519	0.20094	0.20094	0.25149	0.46731	0.36949	0.3967
		0.14326	0.30468	0.30468	0.44614	0.36476	0.31785	0.52838		0.38355	0.17955	0.17955	0.41026	0.67159	0.2223	0.38432
		0.1876	0.40238	0.40238	0.59202	0.34445	0.61878	0.81662		0.19477	0.28194	0.28194	0.44077	0.27975	0.31169	0.63872
		0.39705	0.17314	0.17314	0.41315	0.24953	0.32552	0.42441		0.23916	0.35968	0.35968	0.41443	0.26135	0.16468	0.86498
		1.1952	0.16827	0.16827	0.45872	0.2443	0.38004	0.46543		1.1871	0.43239	0.43239	0.45925	0.60775	0.42986	0.50307
		0.59006	0.2044	0.2044	0.3958	0.6953	0.48866	0.53368		0.38665	0.2389	0.2389	0.40584	0.26802	0.44932	0.46547
		0.22121	0.3115	0.3115	0.62836	0.26656	0.43181	0.43019		0.70433	0.49065	0.49065	0.40672	0.39442	0.53608	0.6209
		0.47692	0.28763	0.28763	0.53951	0.21568	0.45164	0.66235		0.22147	0.27911	0.27911	0.38383	0.36151	0.34718	0.68331
		0.31202	0.23273	0.23273	0.62372	0.58675	0.25129	0.3753		0.46075	0.21652	0.21652	0.50298	0.42304	0.3596	0.55032
		0.48257	0.17659	0.17659	0.39311	0.55642	0.25892	0.48846		0.27952	0.19994	0.19994	0.3297	0.40217	0.3596	0.46028
		0.45599	0.34464	0.34464	0.44518	0.5316	1.2309	0.50158		0.37185	0.26178	0.26178	0.25967	0.33142	0.39145	0.54286
		0.49303	0.35186	0.35186	0.47685	0.49716	0.36943	0.50158		0.67094	0.35323	0.35323	0.55104	0.21373	0.63296	0.45974
		0.46207	0.32474	0.32474	0.44811	0.2453	0.36943	0.54683		0.67094	0.2717	0.2717	0.25826	0.26789	0.39261	0.45597
		0.62971	0.32474	0.32474	0.47178	0.27053	0.94202	0.54279		0.26729	0.2717	0.2717	0.29077	0.36294	0.36882	0.53959
		0.14818	0.41266	0.41266	0.91998	0.39106	0.61942	0.46555		0.18932	0.32739	0.32739	0.21561	0.31928	0.69673	0.45255
		0.3462	0.24734	0.24734	0.54296	0.31183	0.8664	0.5344		0.60163	0.25464	0.25464	0.20807	0.72454	0.57125	0.4463
		0.58581	0.30393	0.30393	0.50765	0.25332	0.31663	0.41143		0.45047	0.22474	0.22474	0.48259	0.45209	0.42392	0.72814
		0.58581	0.39242	0.39242	0.55238	0.31193	0.4017	0.43657		0.57145	0.15993	0.15993	0.44854	1.1116	0.41488	0.5344
		0.79119	0.2593	0.2593	0.64315	0.49726	0.33192	0.48579		0.51952	0.53531	0.53531	0.44854	0.66175	0.41488	0.50273
		0.43053	0.26286	0.26286	0.48944	0.58925	0.36423	0.40754		0.21791	0.75146	0.75146	0.46832	0.6776	0.39756	0.59065
		0.22237	0.4102	0.4102	0.63298	0.59094	0.44275	0.36837		0.54739	0.39195	0.39195	0.41169	1.4274	0.42146	0.58309
		0.17267	0.83868	0.83868	0.58297	0.2793	1.0376	0.7283		0.21993	0.24068	0.24068	0.29518	0.80389	0.46418	0.61011
		0.74153	0.90426	0.90426	0.40609	0.31919	0.49383	0.52226		0.77521	0.60988	0.60988	0.25959	0.37695	0.68362	0.61011
		0.28933	0.30003	0.30003	0.88514	0.45633	0.38677	0.52975		0.40517	0.56717	0.56717	0.43451	0.58583	0.91203	0.43949
		0.55177	0.29021	0.29021	0.96162	0.29623	0.41702	0.36808		0.35107	0.38905	0.38905	0.39514	0.57896	0.28692	0.45313
		0.55177	0.2327	0.2327	0.47514	0.41988	0.37169	0.3984		0.72439	0.55699	0.55699	0.19813	1.2594	0.40918	0.42241
		1.2144	0.19231	0.19231	0.46287	0.33732	0.52039	0.65148		0.50246	0.71338	0.71338	0.22662	0.7936	0.5118	0.53537
		0.89507	0.23507	0.23507	0.54377	0.77312	0.70721	0.6282		0.46911	0.25582	0.25582	0.44287	0.78661	0.5612	0.4062
		0.35006	0.18376	0.18376	0.34191	0.79673	0.49012	0.61884		0.69075	0.55884	0.55884	0.34687	0.73714	0.52496	0.45325
		0.24899	0.18376	0.18376	0.53534	0.46905	0.35823	0.61693		0.96992	0.43336	0.43336	0.29321	0.935	0.55958	0.4274
		1.5586	0.20299	0.20299	1.0755	0.48046	0.37857	0.47883		0.37904	0.82452	0.82452	0.23391	0.77808	0.55958	0.70521
		0.44977	0.17298	0.17298	0.55277	0.93443	0.32515	0.53344		0.24842	0.45796	0.45796	0.45794	0.97488	0.63214	0.65168
		0.35295	0.24476	0.24476	0.41799	0.42235	0.38054	0.53344		0.35	0.65333	0.65333	0.36072	1.6462	0.3658	0.65721
		0.7351	0.23275	0.23275	0.34788	0.45688	0.38767	0.70707		0.36355	0.62599	0.62599	0.26632	1.1141	0.80064	0.51148
		0.33621	0.22929	0.22929	0.45548	0.30991	0.44698	0.42912		0.25809	0.58449	0.58449	0.28612	0.55231	0.33535	0.57975
		0.33042	0.21056	0.21056	0.53436	0.39693	0.90121	0.71534		0.25809	0.37266	0.37266	0.23221	0.56148	0.36266	0.49277
		0.4585	0.2549	0.2549	0.47473	0.46167	0.37851	0.74843		0.37737	0.43976	0.43976	0.30083	0.50064	0.12766	0.48502
		0.22615	0.36649	0.36649	0.47473	0.48708	0.43354	0.47692		0.31174	0.39742	0.39742	0.4587	0.70776	0.1811	1.1252
		0.31529	0.24716	0.24716	0.38432	0.38718	0.3614	0.47935		0.36558	0.61447	0.61447	0.673	0.94272	0.23152	0.60125
		0.37254	0.42406	0.42406	0.4889	0.67841	0.52285	0.36603		0.25814	0.36536	0.36536	0.46145	0.90298	0.1636	0.46446
		0.37254	0.54629	0.54629	0.57235	0.85704	1.0064	0.54089		0.3264	0.66493	0.66493	0.61243	0.54399	0.2473	0.37664
		0.73426	0.63826	0.63826	0.5094	0.51951	0.99087	0.40206		0.59932	0.48068	0.48068	0.43146	0.33552	0.18996	0.43824
		0.23473	0.25603	0.25603	0.41622	0.52052	0.43986	0.58564		0.49116	0.39507	0.39507	0.24817	0.35011	0.51605	0.51987
		0.23473	0.21377	0.21377	0.67168	0.28881	0.31028	0.44274		0.54356	0.47925	0.47925	0.48118	0.32722	0.51605	0.49324
		0.168	0.41303	0.41303	0.45095	0.26175	0.36867	0.57565		0.17344	0.50946	0.50946	0.49624	0.63073	0.4939	0.52534
		0.2331	0.53345	0.53345	0.42684	0.81109	0.44796	0.66172		0.39487	0.44983	0.44983	0.50632	0.33145	0.34247	0.43189
		0.27487	0.48527	0.48527	0.70914	0.83279	0.28421	0.55965		0.35824	0.83448	0.83448	0.40323	0.63784	0.44049	0.47205
		0.39681	0.77582	0.77582	0.62358	0.37278	0.62856	0.47944		0.59942	0.66434	0.66434	0.50132	0.42885	0.21721	0.4807
		0.61166	0.68502	0.68502	0.60129	0.63545	0.53533	0.47944		0.64329	0.45154	0.45154	0.5424	0.4222	0.37754	0.47923
		0.19252	0.34554	0.34554	0.43373	0.54987	0.3413	0.38743		0.22569	0.33528	0.33528	0.33356	0.61954	0.87526	0.56967
		0.20176	0.27768	0.27768	0.60864	0.66588	0.86553	0.382		0.22569	0.58948	0.58948	0.5807	0.34903	0.39615	0.59525
		0.27542	0.39037	0.39037	0.37183	0.71841	0.63013	0.40577		0.22569	0.59076	0.59076	0.68501	0.44634	0.33769	0.71642
		0.32931	0.30099	0.30099	0.78623	0.71963	1.5643	0.51569		0.37181	0.59683	0.59683	0.80167	0.53478	0.33769	0.45907
		0.20625	0.53612	0.53612	0.84735	0.8494	0.48475	0.53408		0.37304	1.2604	1.2604	0.4135	0.3223	0.20013	0.40997
		0.22238	0.53513	0.53513	0.42271	0.35533	0.53472	0.34889		0.25479	1.2887	1.2887	0.45076	0.63983	0.29094	0.4647
		0.29008	0.41263	0.41263	0.54023	0.34672	0.61295	0.48052		0.27451	0.45223	0.45223	0.46425	0.67634	0.47314	0.46624
		0.415	0.41803	0.41803	0.60363	0.77594	0.48427	0.4448		0.17279	0.39678	0.39678	0.33164	0.40072	0.24496	0.56257
		0.30289	0.47356	0.47356	0.44379	0.39975	0.76089	0.80893		0.32631	0.31399	0.31399	0.41363	0.4386	0.70835	0.56257
		0.31126	0.30445	0.30445	0.37	0.39444	1.0679	0.49614		0.34411	0.37045	0.37045	0.36082	0.39854	0.1168	0.56257
		0.41502	0.51103	0.51103	0.55871	0.24781	1.082	0.4268		0.3844	0.32011	0.32011	0.69087	0.45032	0.30884	0.47317
		0.32464	0.26932	0.26932	0.8302	0.3517	0.53429	0.69872		0.32604	0.30685	0.30685	0.48211	0.47839	0.38181	0.66492
		0.18003	0.38277	0.38277	0.50313	0.33587	0.45597	0.61228		0.3463	0.51033	0.51033	0.57754	0.48701	0.51572	0.76692
		0.20737	0.28707	0.28707	0.52209	0.31476	0.44966	0.40918		0.2981	0.24631	0.24631	0.27332	0.57005	0.86915	0.91283
		0.22243	0.59739	0.59739	0.36505	0.38271	0.24875	0.40918		0.25034	0.31149	0.31149	0.22718	0.3959	0.65722	0.63051
		0.22521	0.65292	0.65292	0.29522	0.38453	0.82309	0.49488		0.13294	0.53246	0.53246	0.50531	0.406	0.6622	0.82678
		0.2872	0.56272	0.56272	0.37502	0.4275	0.28568	0.49488		0.28319	0.53154	0.53154	0.25436	0.49616	0.50006	0.81249
		0.42207	0.30813	0.30813	0.83622	0.57476	0.36858	0.57259		0.46353	0.36071	0.36071	0.56197	0.81624	0.39304	0.54722
		0.33594	0.37182	0.37182	0.53462	0.56721	0.44391	0.5637		0.56309	0.40205	0.40205	0.37678	0.41815	0.45915	0.4354
		0.25335	0.30183	0.30183	0.41194	0.63576	0.41673	0.53129		0.40929	0.50058	0.50058	0.46264	0.61287	0.23788	0.47277
		0.27933	0.34756	0.34756	0.36442	0.36567	0.36642	0.62564		0.40929	0.50581	0.50581	0.35135	0.38902	0.84064	0.70388
		0.29261	0.20241	0.20241	0.52662	0.74671	0.47587	0.72186		0.23981	0.42372	0.42372	0.39755	0.72865	0.99868	0.55442
		0.63259	0.44631	0.44631	0.58478	0.27904	0.36062	0.69491		0.36817	0.3501	0.3501	0.35475	0.38002	0.50269	0.42712
		0.38895	0.32294	0.32294	0.46618	0.42871	0.3724	0.39505		0.43466	0.66382	0.66382	0.33582	0.48254	0.65702	0.8322
		0.23786	0.37989	0.37989	0.42891	0.44111	0.85013	0.40279		0.36679	0.23861	0.23861	0.33637	0.31753	0.85248	0.56012
		0.46746	0.41741	0.41741	0.46647	0.3873	0.83585	0.42453		0.17456	0.2571	0.2571	0.37006	0.7287	1.2836	0.41403
		0.20477	0.31452	0.31452	0.37622	0.31956	0.27877	0.4414		0.25782	0.24932	0.24932	0.33099	1.0872	0.63774	0.59323
		0.35188	0.26138	0.26138	0.37766	0.35196	0.54027	0.45381		0.23976	0.40631	0.40631	0.4588	0.58648	0.71279	1.7026
		0.35188	0.30304	0.30304	0.46171	0.6083	0.43498	0.4555		0.17924	0.40631	0.40631	0.20096	0.2731	0.63089	0.62391
		0.32406	0.32362	0.32362	0.55079	0.64033	0.37017	0.77367		0.22705	0.26999	0.26999	0.20302	0.7447	0.72533	0.48134
		0.20542	0.25516	0.25516	0.64022	0.31805	0.46255	0.58793		0.40696	0.41402	0.41402	0.20302	0.77492	0.86068	0.6694
		0.46507	0.28348	0.28348	0.45037	0.51993	0.46255	0.57419		0.72544	0.29723	0.29723	0.26792	0.81877	1.1609	0.64237
		0.15874	0.59194	0.59194	0.34801	0.56991	0.36342	0.41757		0.62286	0.34238	0.34238	0.24975	0.52977	0.47656	0.68244
		0.23474	0.29473	0.29473	0.56118	0.51406	0.35567	0.36704		0.62394	0.25677	0.25677	0.24533	0.52977	0.59584	0.45694
		0.23486	0.56533	0.56533	0.44003	0.68009	0.64295	0.35476		0.32762	0.29012	0.29012	0.36912	0.51867	0.75757	0.70375
		0.37625	0.49829	0.49829	0.52317	0.41427	0.64295	0.5111		0.24306	0.37546	0.37546	0.20979	0.28495	0.39925	0.51778
		0.37736	0.33023	0.33023	0.56494	0.37269	0.48204	0.52305		0.23742	0.66915	0.66915	0.20232	0.84487	0.4191	0.41141
		0.35531	0.34255	0.34255	0.42288	0.51242	0.4151	0.52305		0.40606	0.48927	0.48927	0.27671	0.80901	0.33534	0.67534
		0.19141	0.41436	0.41436	0.55985	0.58344	0.27665	0.55201		0.5117	0.39512	0.39512	0.32357	0.80901	0.6518	0.69565
		0.25055	0.41436	0.41436	0.39195	0.41968	0.4682	0.53995		0.29159	0.31496	0.31496	0.31121	0.33939	0.35445	0.70795
		0.29987	0.39112	0.39112	0.56185	0.66512	0.19033	0.45221		0.25072	0.30009	0.30009	0.57042	0.42113	0.24706	0.7237
		0.3398	0.18089	0.18089	0.27612	0.76306	0.35077	0.45794		0.53718	0.45519	0.45519	0.35726	1.1623	0.24539	0.82601
		0.3398	0.41624	0.41624	0.55247	0.45436	0.22599	0.48012		0.53141	0.51496	0.51496	0.31222	0.50401	0.47475	0.39774
		0.22805	0.3138	0.3138	0.48652	0.47563	0.1638	0.52329		0.2325	0.48597	0.48597	0.23457	0.50401	0.42178	0.57062
		0.3931	0.3194	0.3194	0.83143	0.47563	0.48299	0.36207		0.38346	0.57368	0.57368	0.34568	0.40937	0.56975	0.8967
		0.36366	0.36492	0.36492	0.50895	0.37443	0.42519	0.66697		0.29578			0.14948	0.45862	0.58633	0.73942
		0.3461	0.50789	0.50789	0.43094	0.5959	0.2363	0.47689		0.34284			0.16874	1.2821	0.87925	0.53364
		0.26025	0.26609	0.26609	0.41099	0.30251	0.52628	0.51015		0.19903			0.24825	0.75011	0.33806	0.62817
		0.36876	0.26609	0.26609	0.49133	0.99417	0.46263	0.67096		0.3359			0.18418	0.6291	0.42821	0.41929
		0.33335	0.65508	0.65508	0.62525	0.6052	0.38128	0.50901		0.31683			0.18641	0.43638	0.37932	0.49426
		0.34936	0.45215	0.45215	0.62904	0.70524	0.64666	0.57112		0.95663			0.19165	0.60262	0.4601	0.49426
		0.56225	0.45215	0.45215	0.49836	0.55299	0.59754	0.57112		0.40335			0.16781	0.95439	0.37445	0.63507
		0.15964	0.33371	0.33371	0.47116	0.62146	0.51846	0.6248		0.26018			0.18778	0.933	0.42501	0.33782
		0.35108	0.3097	0.3097	0.42278	0.252	0.46859	0.92245		1.0481			0.18655	0.31607	0.47622	0.5452
		0.1663	0.35505	0.35505	0.59435	0.30949	0.34144	0.92328		0.5096			0.18002	0.26949	0.35118	0.76239
		0.26587	0.54352	0.54352	0.47643	0.57767	0.32504	1.7125		0.29894			0.64669	0.42829	0.78861	0.74387
		0.39414	0.51103	0.51103	0.92537	0.35601	0.3384	0.6315		0.17115			0.52212	0.52811	0.89924	0.72842
		0.46793	0.57003	0.57003	0.40398	0.40168	0.54359	0.42276		0.64044			0.23541	0.34142	0.71724	0.91947
		0.53781	0.51267	0.51267	0.32093	0.5078	0.48386	0.4452		0.24496			0.51921	0.39001	0.73933	0.38389
		0.23429	0.40895	0.40895	0.37953	0.41953	0.84942	0.43626		0.27632			0.64991	0.49499	0.60505	0.64992
		0.17634	0.44659	0.44659	0.57601	0.44582	0.75766	0.29317		0.22867			0.68175	0.53609	0.38422	0.43735
		0.2776	0.38738	0.38738	0.42132	0.46763	0.29946	0.49638		0.14388			0.73483	0.42366	0.70495	0.71834
		0.2776	0.40187	0.40187	0.46565	0.41541	0.49063	0.49432		0.15649			0.56126	0.42366	0.70495	0.89847
		1.3789	0.36498	0.36498	0.77502	0.46604	0.69068	0.50789		0.16105			0.50347	0.39599	0.23664	0.89847
		2.4873	0.47172	0.47172	0.82478	0.54858	0.325	0.32633		0.42965			0.37229	0.51988	0.35845	0.71653
		0.51852	0.37338	0.37338	0.53247	0.54858	0.61104	0.64604		0.42965			0.29065	0.40018	0.76989	0.54738
		0.30267	0.35516	0.35516	0.60959	0.56687	1.3439	0.3285		0.40315			0.37415	0.63877	0.29367	0.46651
		0.5879	0.41779	0.41779	0.54291	0.56066	0.48526	0.50292		0.26627			0.45769	0.48424	0.55147	0.94134
		0.50981	0.34344	0.34344	0.5502	0.49512	0.25907	0.46466		0.59061			0.27991	0.33705	0.72399	0.55287
		0.4164	0.43064	0.43064	0.74578	0.34912	0.80609	0.48755		0.31779			0.36006	0.39279	1.174	0.46791
		0.51025	0.44197	0.44197	0.3466	0.42816	0.52881	0.55231		0.94431			0.46758	0.34523	0.37185	0.80686
		0.51308	0.45462	0.45462	0.69649	0.65359	0.28773	0.55231		0.61546			0.37972	0.38162	0.27696	0.55274
		0.29326	0.33599	0.33599	0.28782	0.60751	0.58353	0.45007		0.24723			0.37972	0.46312	0.58141	0.44108
		0.36326	0.35328	0.35328	0.67977	0.54749	0.35608	0.45749		0.40258			0.27353	0.46312	0.40861	0.61383
		0.41474	0.35789	0.35789	0.43164	0.48424	0.24139	0.40216		0.24884			0.46555	0.38538	0.37069	0.51553
		0.63774	0.65117	0.65117	0.65103	0.39115	0.32047	0.44092		0.37847			0.47557	0.3856	0.28077	0.64164
		0.28434	0.34259	0.34259	0.574	0.32482	0.46845	0.6885		0.32791			0.44254	0.39403	0.24812	0.64164
		0.45572	0.39854	0.39854	0.49915	0.54849	0.27179	0.62487		0.30186			0.26195	0.34914	0.54369	0.51064
		0.45572	0.40931	0.40931	0.8995	0.3	0.27421	0.61999		0.21893			0.26405	0.37697	0.33534	0.61281
		0.28264	0.57118	0.57118	0.26495	0.29301	0.62691	0.31771		0.2358			0.25524	0.21817	0.28517	0.76317
		0.47513	0.50673	0.50673	0.36946	0.5052	0.58624	0.43695		0.24184			0.57124	0.26253	0.28974	0.54352
		0.47513	0.4596	0.4596	0.63605	0.32259	0.46589	0.49623		0.45984			0.28477	0.47235	0.35121	0.68599
		0.33433	0.43458	0.43458	0.70468	0.31225	0.47568	0.51663		0.25736			0.34577	0.41596	0.27641	0.47604
		0.31947	0.43855	0.43855	0.51692	0.21919	0.42979	0.4263		0.23379			0.36999	0.33125	0.39736	0.51764
		0.37131	0.2103	0.2103	0.4817	0.43353	0.51049	0.52005		0.27875			0.29602	0.44893	0.52037	0.5449
		0.43777			0.43062	0.40283	0.53566	0.52005		0.21052			0.26671	0.51152	0.28813	0.37522
		0.50783			0.67183	0.63569	0.42203	0.65345		0.37089			0.34501	0.60548	0.26801	0.62461
		0.23779			0.48579	0.36145	0.48996	0.45179		0.29575			0.36971	0.48787	0.37846	0.57403
		0.4006			0.49253	0.53119	0.27789	0.80923		0.14329			0.56969	0.65037	0.37319	0.6278
		0.2845			0.46664	0.5164	0.343	0.44686		0.55715			0.26894	0.50201	0.21106	0.63481
		0.26444			0.70914	0.31241	0.27616	0.4004		0.5997			0.39701	0.48815	0.50611	0.64231
		0.43318			0.70914	0.48505	0.26846	0.65152		0.6271			0.48435	0.53603	0.41155	0.58206
		0.30191			0.75143	0.39709	0.31306	0.46022		0.50882			0.29984	0.36303	0.8617	0.51763
		0.18473			0.53054	0.36291	0.44585	0.35684		0.52704			0.36611	0.4512	0.13265	0.41645
		0.26161			0.43973	0.36291	0.24165	0.40118		0.72543			0.37025	0.87187	0.19998	0.35011
		0.26947			0.53043	0.461	0.49468	0.72507		0.28378			0.34088	0.67139	0.36539	0.61126
		0.27728			0.46871	0.44815	0.38131	0.35141		0.22621			0.43834	0.66247	0.70569	0.61126
		0.37485			0.46145	0.41964	0.24192	0.42155		0.44769			0.30188	0.51613	0.47529	0.66237
		0.67915			0.65978	0.54791	0.30226	0.50799		0.12893			0.41735	0.22353	0.61389	0.82729
		0.27744			0.29276	0.41565	0.33433	0.45499		0.32305			0.20894	0.28531	0.62084	0.66996
		0.2919			0.8217	0.41068	0.2796	0.38349		0.23944			0.41337	0.40403	0.63871	0.4666
		0.31224			0.61183	0.55187	0.4498	0.63991		0.23674			0.27824	0.33843	0.63871	0.43201
		0.27			0.92345	0.50867	0.41045	0.47651		0.33463			0.18207	0.72586	0.60515	0.71354
		0.39043			0.83785	0.43275	0.55922	0.45307		0.38632			0.3459	0.31397	0.60515	0.60217
		0.26635			0.48021	0.3106	0.64534	0.46779		0.57982			0.27186	0.61254	0.24505	0.69259
		0.34446			0.38153	0.35846	0.36813	0.42832		0.67981			0.41231	0.76959	0.39962	0.57691
		0.88798			0.43828	0.37068	0.78051	0.40921		0.4866			0.34128	0.42046	1.5569	0.45811
		0.18967			0.43416	0.21098	1.1232	0.4688		0.23306			0.30036	0.38941	0.35335	0.43097
		0.28564			0.50643	0.38845	0.6931	0.75548		0.33697			0.30036	0.56228	0.59157	0.42973
		0.43725			0.33985	0.38845	0.70382	0.59172		0.2986			0.28475	0.60842	0.89358	0.34351
		0.67178			0.58353	0.45584	0.99585	0.5763		0.30427			0.22452	0.53426	0.42843	1.0976
		0.35838			0.43723	0.45718	0.48096	0.57518		0.44574			0.28834	0.54132	0.74558	1.0908
		0.3861			0.48732	0.2914	0.46582	0.54355		0.48312			0.39758	0.36963	0.69498	1.0683
		0.34046			0.56221	0.68927	0.34667	0.50237		0.23466			0.20277	0.29294	0.61444	1.1042
		0.5552			0.55134	0.65799	0.44225	0.43907		0.23466			0.43575	0.29772	1.4383	1.0363
		0.49856			0.76287	0.55662	0.93145	0.55527		0.21065			0.32515	0.55574	0.67557	0.36774
		0.43648			0.60078	0.31968	0.85797	0.49543		0.21065			0.31749	0.50016	0.49794	0.39811
		0.4582			0.61116	0.21141	1.5083	0.4264		0.7515			0.22499	0.50016	0.4213	0.32315
		0.57948			0.57802	0.43343	0.47544	0.40074		0.20198			0.27264	0.33733	0.41521	0.93093
		0.52541			0.77669	0.44247	0.63594	0.55899		0.43908			0.27264	0.51304	0.32934	1.0517
		0.40052			0.44926	0.29672	0.73287	0.50938		0.19365			0.27108	0.36465	0.64246	0.66669
		0.52228			0.43717	0.31274	0.74995	0.56068		0.1292			0.27108	0.34921	0.74535	0.37918
		0.1841			0.49312	0.4046	0.8849	0.35676		0.28533			0.36398	0.29498	0.38832	0.70978
		0.17394			0.53628	0.2684	1.0733	0.56891		0.29873			0.24735	0.33562	0.33962	1.0351
		0.50053			0.34463	0.37161	0.90929	0.38481		0.32831			0.3383	0.40022	1.533	0.37077
		0.18436			0.6467	0.42614	0.85614	0.57549		0.46821			0.24509	0.32691	0.78255	0.37295
		0.38925			0.41658	0.46251	0.52087	0.57549		0.44684			0.36785	0.32841	0.74363	0.28739
		0.21079			0.47216	0.55495	0.37249	0.61166		0.38929			0.36785	0.3449	0.40157	0.66438
		0.48819			0.52964	0.32436	0.77976	0.43405		0.38578			0.31097	0.6155	0.84393	0.38982
		0.30294			0.6843	0.28746	0.55699	0.48664		0.63681			0.26909	0.62553	0.48866	0.87815
		0.17233			0.70656	0.37823	0.60969	0.4958		0.49631			0.2543	0.57946	0.43688	0.69957
		0.37318			0.50981	0.32714	0.89526	0.37144		0.72426			0.24577	0.87361	0.35773	0.69957
		0.37318			0.45647	0.61249	1.0853	0.36526		0.46118			0.36372	0.41319	0.30524	0.32116
		0.19602			0.54936	0.60102	0.92032	0.4073		0.55583			0.37346	0.58766	0.3907	0.30803
		0.65822			0.5484	0.28205	0.66138	0.42768		0.37296			0.34676	0.72356	0.2962	0.39803
		0.27938			0.67359	0.28668	0.67844	0.58309		0.57403			0.34344	0.84916	0.31339	0.67123
		0.31892			0.44935	0.76845	0.6942	0.41236		0.38044			0.20276	0.42928	0.27263	0.60217
		0.35428			0.44348	0.56028	0.29951	0.33683		0.42257			0.46299	0.48916	0.97009	0.43541
		0.29708			0.53471	0.58111	0.65217	0.44922		1.2867			0.46299	0.429	0.94185	0.37253
		0.25223			0.45844	0.58111	0.71267	0.46997		0.3499			0.94428	0.33592	0.31229	0.26728
		0.19087			0.4903	0.39123	0.83934	0.33726		0.27644			0.41242	0.43682	0.44271	0.81975
		0.53497			0.50583	0.51877	0.9372	0.54665		0.55893			0.46792	0.3712	0.50453	0.71204
		0.27044			0.44572	0.51877	0.87879	0.64665		0.40324			0.40205	0.4848	0.51262	0.35857
		0.34553			0.484	0.46007	0.527	0.58127		0.40324			0.5542	0.27841	0.68965	0.27378
		0.27981			0.52525	0.485	0.527	0.58127		0.54299			0.43232	0.50034	0.45414	0.26019
		0.24345			0.32523	0.485	0.63871	0.37943		0.54299			0.27241	0.36116	0.42045	0.26019
		0.53523			0.27206	0.71791	0.54428	0.48262		0.60596			0.47675	0.39148	0.25377	0.41855
		0.32695			0.45371	0.53349	0.4295	0.48262		0.91685			0.39651	0.59988	0.32303	0.25726
		0.19021			0.37981	0.66673	0.45888	0.57392		0.91685			0.34208	0.57942	0.31917	0.30159
		0.27733			0.64467	0.54342	0.5345	0.63139		0.28011			0.28814	0.35369	0.74922	0.27309
		0.23306			0.56752	0.32598	0.62741	0.63256		0.24748			0.40347	0.40357	0.61251	0.44957
		0.33566			0.60356	0.29734	0.45849	0.63256		0.30882			0.34681	0.40357	0.27083	0.19368
		0.36538			0.36796	0.38504	0.81193	0.49916		0.21621			0.37987	0.33113	0.43404	0.58001
		0.25863			0.64397	0.49137	0.45649	0.78109		0.44361			0.51357	0.35545	0.43611	0.80687
		0.25863			0.38315	0.43589	0.5783	0.72217		0.48507			0.36929	0.36242	0.29538	0.61431
		0.2976			0.34171	0.30848	0.6733	0.72217		0.37022			0.34463	0.5715	0.23308	0.61431
		0.77108			0.70331	0.33007	0.58258	0.52772		0.27852			0.25042	0.57255	0.42681	0.42177
		1.3988			0.54479	0.49797	0.55904	0.43834		0.33937			0.34562	0.57255	0.75682	0.59149
		0.30841			0.3282	0.57468	0.41558	0.67895		0.22115			0.35355	0.43927	0.37101	0.42204
		0.38635			0.50215	0.31451	0.77502	0.47204		0.24239			0.62096	0.42573	0.37464	0.28533
		0.21746			0.96241	0.66211	0.53845	0.65611		0.32786			0.31295	0.28037	0.39272	0.46792
		0.33716			0.6512	0.36371	0.32343	0.34163		0.27814			0.28405	0.31007	0.49611	0.35134
		0.45331			0.3251	0.55973	0.60337	0.42804		0.42478			0.26345	0.36559	1.0871	0.40651
		0.3926			0.40802	0.2365	0.61575	0.68388		0.42307			0.25044	0.36372	0.48338	0.54537
		0.6469			0.49884	0.49582	0.76469	0.36933		0.49126			0.40059	0.19339	0.5721	0.24491
		0.82718			0.33335	0.42744	0.76469	0.3686		0.6416			0.36364	0.26066	0.17741	0.42718
		0.35154			0.92504	0.42887	1.1104	0.53824		0.37622			0.25106	0.30137	0.32754	0.29732
		0.64402			0.79341	0.46482	0.52616	0.34555		0.41906			0.37199	0.18728	0.25244	0.34744
		0.32965			0.37641	0.37578	0.42541	0.4334		0.35009			0.26937	0.45747	0.3014	0.45467
		0.37338			0.48987	0.55113	0.46153	0.46965		0.31777			0.32547	0.49221	0.20432	0.45758
		0.34164			0.55296	0.42581	0.43789	0.3997		0.44093			0.3339	0.28309	0.74211	0.37372
		0.36851			0.42083	0.43877	1.3819	0.3997		0.46848			0.3473	0.24999	0.38582	0.51554
		0.36851			0.50905	0.39618	0.77339	0.39826		0.45588			0.20962	0.40151	0.31394	0.51554
		0.54766			0.35867	0.41839	0.93436	0.53626		0.2497			0.30422	0.43376	0.39853	0.65205
		0.59463			0.31522	0.224	0.39947	0.45471		0.2152			0.26209	0.56357	0.34034	0.55896
		0.54891			0.41496	0.2911	0.61973	0.53815		0.20786			0.25406	0.56357	0.29208	0.60079
		0.24515			0.48314	0.59218	0.46191	0.51075		0.24481			0.23082	0.54416	0.8342	0.59623
		0.37828			0.34734	0.55594	0.41973	0.73827		0.24481			0.20476	0.57642	0.12699	0.54227
		1.2286			0.39545	0.538	0.93989	0.73827		0.27983			0.13723	0.54386	0.1217	0.41576
		0.75196			0.44888	0.4817	0.92386	0.63742		0.31438			0.38292	0.7305	0.10363	0.45641
		0.54806			0.45226	0.63867	0.61696	0.50432		0.31438			0.38448	0.99765	0.47474	0.47605
		0.3592			0.52701	0.36212	0.5184	0.94856		0.3916			0.2553	0.705	0.47474	0.40007
		0.46293			0.54471	0.41714	0.61631	0.97462		0.35794			0.18607	0.31752	0.24467	0.45271
		0.50377			0.56517	0.41714	0.69125	0.74061		0.23312			0.21834	0.3525	0.18093	0.68875
		0.4399			0.55149	0.62833	0.89801	0.77792		0.30154			0.20605	0.67203	0.42319	0.96044
		0.47922			0.33507	0.62508	0.39056	0.46883		0.30154			0.18303	0.31587	0.4413	0.43627
		0.31353			0.352	0.73015	0.49917	0.37178		0.58698			0.18879	0.67446	0.54551	0.6918
		0.79104			0.35592	0.42947	0.61303	0.39302		0.33526			0.20956	0.69089	0.61447	0.35023
		0.40014			0.5027	0.78302	0.36981	0.55505		0.28039			0.18617	0.47361	0.53125	0.7881
		0.31724			0.31561	0.37961	0.29491	0.51789		0.3317			0.1478	0.72987	0.52296	0.93602
		0.95751			0.3836	0.38964	0.33525	0.3859		0.2502			0.17551	0.30471	0.15319	0.79996
		0.33854			0.33285	0.4596	0.46115	0.34948		0.27164			0.22366	0.54095	0.44814	0.35177
		0.37644			0.48398	0.42436	0.52396	0.48811		0.34077			0.21297	0.83553	0.84522	0.52839
		0.38197			0.87497	0.39333	1.2709	0.48811		0.34366			0.14614	0.4508	1.4236	0.65504
		0.21089			0.47743	0.49878	0.72029	0.44123		0.55036			0.37957	0.38324	0.78432	0.65504
		0.32785			0.50346	0.42391	0.72981	0.42008		0.59226			0.15545	0.15308	0.80781	0.63076
		0.24536			0.50957	0.39883	1.7728	0.56384		0.63554			0.17582	0.18834	0.12772	0.61242
		0.31491			0.65677	0.34809	0.84053	0.5206		0.25389			0.17802	0.41578	0.37797	0.47783
		0.15993			0.59943	0.37041	0.54729	0.3664		0.4398			0.617	0.21901	0.51049	0.45495
		0.15462			0.62124	0.2082	0.96705	0.472		0.41347			0.33097	0.45309	0.56707	0.34201
		0.33546			0.68031	0.24547	0.39511	0.60249		0.41417			0.38164	0.4679	0.3318	0.57996
		0.46567			0.50291	0.49126	0.59582	0.59497		0.56383			0.59255	0.32317	0.4958	0.73967
		0.43966			0.6406	0.92307	0.7877	0.53801		0.55115			0.36537	0.3221	0.41487	0.79492
		0.43966			0.61427	0.55921	0.99032	0.59638		0.39297			0.27898	0.26214	1.0632	0.40258
		0.77761			0.24316	0.5047	0.48172	0.50877		0.44496			0.71161	0.3658	0.6083	0.43595
		0.8204			0.38054	0.5505	0.74715	0.50877		0.43694			0.22434	2.1858	0.63166	0.5895
		0.52554			0.38054	0.50588	0.71182	0.38325		0.24159			0.37459	0.99589	0.74886	0.5895
		0.3533			0.34916	0.56055	0.68409	0.44314		0.46469			0.20053	0.78061	0.57558	0.46054
		0.37081			0.33335	0.67976	0.5373	0.46187		0.26169			0.47582	0.7473	0.4002	0.55196
		0.35614			0.27876	0.39753	0.71865	0.64041		0.27583			0.35808	0.7473	0.34416	0.42463
		0.35614			0.78558	0.31468	0.71865	0.62233		0.37399			0.21977	0.58388	0.91217	0.42628
		0.62705			0.49851	0.47038	1.0803	0.62233		0.2508			0.22647	0.48381	0.8933	0.33531
		0.15903			0.49851	0.45434	0.80984	0.48173		0.21366			0.34554	0.41584	0.73961	0.36533
		0.25184			0.44171	0.27775	0.95217	0.45831		0.17197			0.34554	0.67521	0.34738	0.29985
		0.49463			0.42232	0.80056	0.64009	0.48077		0.41235			0.34945	0.61241	0.46333	0.25715
		0.54888			0.39484	0.6785	1.5291	0.66487		0.34694			0.25464	0.68561	0.61175	0.24971
		0.25756			0.55716	0.31481	1.7197	0.4286		0.32073			0.2674	0.40118	0.54653	0.35441
		0.67438			0.40522	0.38464	2.021	0.35012		0.30857			0.3162	0.84291	0.38752	0.73989
		0.39939			0.61304	0.33129	0.98779	0.48799		0.31534			0.30662	0.26448	0.39731	0.38039
		0.32817			0.39317	0.33129	0.76007	0.46622		0.28324			0.31082	0.22907	0.39731	0.43697
		0.41773			0.46398	0.34054	0.96054	0.63141		0.30028			0.40853	0.19547	0.41246	0.45212
		0.45841			0.5135	0.51617	0.96054	0.33351		0.21178			0.35675	0.58536	0.40495	0.45212
		0.38818			0.43002	0.23776	1.3664	0.53783		0.26104			0.35724	0.88439	0.66794	0.32844
		0.36353			0.40901	0.26523	1.0804	0.5638		0.20771			0.38878	0.88439	0.36079	0.34079
		0.33525			0.39764	0.60594	0.70503	0.5638		0.2713			0.36527	0.45739	0.29513	0.48538
		0.33198			0.52937	0.45446	0.65662	0.57646		0.28267			0.27437	0.45299	1.2968	0.35272
		0.67659			0.65369	0.36689	0.6465	0.66621		0.23515			0.34095	0.38267	0.61857	0.41875
		0.2432			0.52996	0.3784	0.78802	0.57017		0.23398			0.2909	0.63238	0.31944	0.44168
		0.48087			0.49915	0.3784	1.4454	0.57992		0.23032			0.29104	0.54822	0.36287	0.421
		0.50496			0.43189	0.35477	1.3348	0.69286		0.32512			0.42586	0.94287	1.1677	0.49371
		0.4734			0.33134	0.24509	1.3348	0.55255		0.17083			0.24242	0.25662	0.87615	1.0503
		0.50727			0.5447	0.59181	0.88881	0.55255		0.29622			0.30642	0.31623	0.30022	1.003
		0.50727			0.2755	0.25471	0.99525	0.52534		0.20613			0.24075	0.31288	0.33925	0.4205
		0.79758			0.30432	0.25874	0.91939	0.53515		0.25506			0.2646	0.31288	0.21154	0.4272
		0.61325			0.56272	0.24588	0.93084	0.70022		0.40191			0.27664	0.35903	0.57385	0.46744
		0.60052			0.86433	0.20735	2.0439	0.41549		0.24883			0.32505	0.3298	0.60862	0.50799
		0.60052			0.54435	0.25533	0.84402	0.40673		0.25131			0.2552	0.37308	0.46473	0.40886
		0.43753			0.45917	0.23735	0.76214	0.57452		0.39686			0.31816	0.63113	0.38226	0.518
		0.33508			0.44998	0.74645	0.78753	0.55394		0.27015			0.34332	0.31572	0.42062	0.46188
		0.29314			0.43016	0.30247	0.43939	0.61111		0.31938			0.4135	0.32501	1.1682	0.36437
		0.25796			0.63491	0.24499	1.4453	0.5185		0.26639			0.30914	0.28202	0.41217	0.39941
		0.3137			0.54203	0.28171	0.79285	0.50501		0.167			0.24314	0.6285	0.45128	0.39002
		0.44243			0.46758	0.2967	0.7581	0.56626		1.0422			0.30833	0.29123	0.54342	0.43535
		0.38478			0.52563	0.46345	0.78562	0.57691		0.27809			0.25919	0.71524	0.39543	0.63101
		0.44607			0.37944	0.32063	0.71359	0.5402		0.49648			0.25919	0.28988	0.57343	0.47689
		0.46816			0.29801	0.41549	0.83329	0.41834		0.53137			0.2366	0.39385	0.541	0.53679
		0.34264			0.24687	0.35423	0.39988	0.62179		0.53137			0.31102	0.42351	0.54641	0.32269
		0.48132			0.31038	0.23792	0.42518	0.48697		0.26264			0.18099	0.2007	0.40553	0.43998
		0.46388			0.27799	0.38197	0.96287	0.69344		0.43549			0.22113	0.35614	1.0287	1.1064
		0.37336			0.47768	0.36805	0.45462	0.53836		0.4491			0.29105	0.53149	0.55254	0.68912
		0.39949			0.45172	0.54083	0.46296	0.71115		0.46008			0.29476	0.60403	0.35953	0.79047
		0.39557			0.31309	0.61704	0.84055	0.71115		0.50834			0.24356	0.60403	0.37976	0.32711
		0.33503			0.31309	0.40417	0.51103	0.46858		0.32728			0.22577	0.29063	0.30377	0.64912
		0.60473			0.37379	1.3004	0.42002	0.51011		0.35465			0.25118	1.1593	0.58266	0.72267
		0.73586			0.41766	1.2478	0.39903	0.59206		0.26488			0.17238	0.74403	0.21344	0.72596
		0.31637			0.2956	0.63961	0.44452	0.80426		0.28991			0.25142	0.39838	0.13994	0.41081
		0.81761			0.42768	0.56364	0.4992	0.5047		0.23522			0.2428	0.52213	0.433	0.6335
		0.98527			0.32806	0.40903	0.56936	0.75971		0.58829			0.22248	0.26622	0.24952	0.31601
		0.56221			0.42916	0.3531	0.67059	0.49187		0.20192			0.27002	0.26622	0.27087	0.29265
		0.37023			0.26179	0.28583	0.45165	0.80492		0.18556			0.19893	0.43236	0.39331	0.49182
		0.58684			0.35509	0.63409	0.24318	1.0754		0.38768			0.29664	0.43236	0.39703	0.39825
		0.40917			0.31811	0.69411	0.69481	0.72455		0.38462			0.32109	0.5194	0.31247	0.75361
		0.23247			0.54157	0.45624	0.65448	0.68032		0.24486			0.30761	0.40112	0.21248	0.26783
		0.49921			0.28921	0.49435	0.94895	1.0055		0.48227			0.37631	0.42884	0.17908	0.28664
		0.26186			0.40071	0.66391	0.90223	0.64553		0.25846			0.52523	0.53807	0.36788	0.51638
		0.34116			0.33622	0.32059	0.67568	0.76794		0.23521			0.66464	0.22418	0.23844	0.27143
		0.4483			0.33622	0.63022	0.3321	0.90623		0.25426			0.56193	0.39498	0.51083	0.45558
		0.78117			0.45843	0.74748	0.41956	0.96368		0.32202			0.46672	0.42564	0.33054	0.30019
		0.33708			0.40884	0.6502	0.48186	0.48182		0.26836			0.51655	0.27719	0.33055	0.59991
		0.31892			0.40884	0.63917	0.49245	0.44854		0.18552			0.45832	0.24448	0.13854	0.30627
		0.41009			0.36814	0.62819	1.2916	0.48579		0.14458			0.32168	0.30504	0.24551	0.63111
		0.30458			0.36814	0.64804	1.2916	0.5038		0.28219			0.66291	0.28628	0.49018	0.37277
		0.34534			0.39215	1.0089	0.74548	0.71229		0.28219			0.45426	0.35562	0.37503	0.36959
		0.35739			0.29909	1.0781	0.59528	0.40576		0.18316			0.44867	0.19941	0.48152	0.38166
		0.36441			0.29026	1.3506	1.0945	0.49036		0.35401			0.52867	0.22335	0.35929	0.86888
		0.31756			0.29817	0.91819	0.65956	0.38369		0.32505			0.52867	0.24884	0.47794	0.25926
		0.22811			0.25516	0.85784	0.52958	0.48119		0.24672			0.43014	0.27234	0.81093	0.29801
		0.37174			0.46209	0.93297	0.59389	0.60749		0.26206			0.29423	0.24899	1.0191	0.42569
		0.35806			0.38489	1.9066	0.53525	0.65313		0.46209			0.48803	0.21593	0.42235	0.46212
		0.34328			0.2947	1.1	0.62003	0.61358		0.36613			0.41409	0.38985	0.69804	0.5446
		0.31198			0.42526	0.98032	0.44613	0.55855		0.40065			0.43581	0.2052	0.41257	0.26513
		0.60041			0.51444	0.79017	0.70841	0.66195		0.38402			0.56425	0.46618	0.69055	0.15079
		0.63558			0.28292	1.2045	0.78701	0.78622		0.48382			0.33968	0.37043	0.75443	0.44592
		0.42183			0.40771	0.43847	0.78701	0.86692		0.25169			0.4615	0.28478	0.51235	0.47744
		0.39196			0.40771	0.41544	0.39681	0.61511		0.35995			0.34503	0.39246	0.80899	0.75834
		0.39776			0.26922	0.68619	0.4324	0.58315		0.41577			0.42279	0.20996	0.35516	0.40843
		0.38822			0.34998	0.58038	0.42045	0.4779		0.61938			0.44174	0.33763	0.5827	0.31312
		0.38822			0.31591	0.82051	0.43573	0.48016		0.35744			0.81069	0.33985	0.60734	0.37257
		0.24778			0.41052	1.0331	0.43573	0.80817		0.39283			0.89418	0.28271	0.57088	0.23494
		0.32113			0.53937	1.4801	0.43573	0.99403		0.4205			0.26263	0.38533	0.6832	0.20545
		0.32258			0.25763	1.5619	0.76196	0.81		0.5286			0.37333	1.0744	0.45973	0.41335
		0.26356			0.4015	1.0384	0.40381	0.79423		0.2077			0.37333	0.48783	0.4965	0.55015
		0.26918			0.53344	0.55954	0.48307	0.63831		0.49886			0.4652	0.29345	0.73462	0.40111
		0.32658			0.5196	0.6406	0.68936	0.50649		0.49886			0.58848	0.74274	0.62028	0.50473
		0.32658			0.62086	0.82624	0.52009	0.61469		0.29291			0.41349	0.32708	1.1619	0.21897
		0.36522			0.81097	0.52506	0.57734	0.60205		0.19824			0.27704	0.52243	1.1929	0.34493
		0.31766			0.35445	0.52608	0.57734	0.58952		1.1836			0.579	0.56544	0.62135	0.52797
		0.31388			0.45201	0.55808	0.30881	0.47701		0.15172			0.55953	0.46004	0.52292	0.48772
		0.3966			0.82834	0.34051	0.21711	0.47701		0.22174			0.43209	0.31489	0.36811	0.36992
		0.4229			0.67507	0.55141	0.56432	0.3929		0.34228			0.55378	0.31371	0.62311	0.22757
		0.31072			0.75323	0.81003	1.4083	0.46558		0.29506			0.38582	0.49573	0.46724	0.49643
		0.67095			0.41837	0.67604	1.2279	0.59801		0.43195			0.43648	0.17037	0.49195	0.38901
		0.72986			0.72661	0.4954	0.42175	0.62614		0.35457			0.41389	0.36098	0.43136	0.52509
		0.43969			0.67083	0.54575	0.58481	0.62614		0.2752			0.42484	0.33902	0.43072	0.19601
		0.60763			0.59358	0.84945	1.0906	0.40636		0.31704			0.52901	0.45305	1.0978	0.35777
		0.25566			0.35121	0.87039	0.55791	0.45302		0.21664			0.58482	0.33282	0.55695	0.49811
		0.26724			0.41269	0.90325	0.54732	0.4975		0.46218			0.30807	0.46819	0.46083	0.32839
		0.26893			0.49224	0.38409	0.65193	0.53815		0.40666			0.37309	0.57199	0.48738	0.39816
		0.81246			0.6826	0.72833	0.35676	0.49273		0.9421			0.5256	0.45589	0.30081	0.40264
		0.54627			0.60398	0.80893	0.28195	1.1947		0.40774			0.5256	0.46646	0.93845	0.50168
		0.23896			0.56413	0.58946	0.45466	0.59642		0.42084			0.40438	0.61023	0.54549	0.4714
		0.32294			0.53846	1.2038	0.43543	0.41553		0.26753			0.46369	0.45507	0.28905	0.37297
		0.311			0.52149	1.1008	0.4533	0.44813		0.20986			0.56446	0.45507	0.29267	0.26464
		0.44807			0.64745	0.84497	0.64688	0.36753		0.21637			0.55499	0.30324	0.27416	0.25507
		0.37542			0.62514	0.74166	0.73324	0.5782		0.3828			0.66069	0.31114	0.60417	0.306
		0.29827			0.57983	1.4485	0.60486	0.5782		0.46904			0.70366	0.32497	0.66938	0.21825
		0.29827			0.55791	0.36559	0.50068	0.50563		0.47589			0.4891	0.40066	0.25318	0.36163
		0.3213			0.75234	0.27483	0.66807	0.35805		0.43981			0.493	0.28319	0.66788	0.48074
		0.35144			0.55899	0.62462	0.30536	0.70631		0.22149			0.38848	0.29336	0.62059	0.74748
		0.58754			0.34523	0.65835	1.0552	0.70631		0.22763			0.22565	0.45409	0.28935	0.87142
		0.39802			0.28504	0.4551	0.68177	0.66304		0.31051			0.28558	0.39098	0.29818	0.59918
		0.19146			0.76422	0.58939	0.42301	0.57572		0.24201			0.68783	0.47732	0.24377	0.44677
		0.29947			0.96267	0.96647	0.40374	0.64162		0.24201			0.29728	0.66642	0.69588	0.44598
		0.33219			0.41927	0.47052	0.43189	0.98285		0.29501			0.36979	0.39829	0.5872	0.967
		0.19089			0.55706	0.48875	0.77134	0.78407		0.38556			0.23866	0.21174	0.42235	0.7213
		0.19638			0.52308	0.28791	0.87925	0.78407		0.23982			0.72165	1.1569	0.57308	0.39947
		0.32703			0.58641	0.32192	0.41796	0.9092		0.24039			0.30357	0.5338	0.3304	0.70183
		0.31132			0.36977	0.41942	0.47832	0.39021		0.21559			0.96311	0.5479	0.24679	0.35444
		0.35155			0.36977	1.0875	0.62106	0.6007		0.32857			0.54059	0.31543	1.0917	0.5942
		0.25963			0.48187	1.0897	0.55574	0.73865		0.37071			0.51331	0.50889	0.42984	0.25351
		0.17613			0.53671	1.1558	0.45806	0.73865		0.25856			0.27821	0.88825	0.58561	0.47452
		0.17613			0.24554	1.0239	0.33928	0.59919		0.25556			0.44498	0.36928	0.2842	0.39173
		0.33004			0.21391	0.74789	0.62658	0.43811		0.39539			0.47238	0.33805	0.22127	0.30702
		0.37716			0.4636	0.77146	1.0346	0.45483		0.30337			0.58704		0.20035	0.41217
		0.34139			0.5475	0.59124	0.52405	0.59548		0.33144			0.27058		0.46541	0.27398
		0.31302			0.54708	0.91152	0.55942	0.50888		0.3581			0.37446		0.4394	0.41309
		0.31302			0.5568	1.0148	0.84173	0.50888		0.39361			0.44562		0.42056	0.41309
		0.58975			0.35646	0.82832	0.42915	0.6198		0.44342			0.29936		0.61254	0.50589
		0.48505			0.50682	0.79183	0.42915	0.40549		0.26169			0.52572		0.31255	0.35817
		0.45247			0.20786	0.72823	0.39023	0.55859		0.26169			0.38079		0.25056	0.41461
		0.32507			0.49942	0.98462	0.42499	0.66618		0.24352			0.23188		0.51755	0.52831
		0.21524			0.7988	0.89652	0.34087	0.89029		0.24395			0.75518		1.2473	0.69111
		0.28752			0.60807	0.47623	0.38948	0.47585		0.38009			0.54998		0.36639	0.54005
		0.39047			0.87163	1.2018	0.39687	0.36666		0.24984			0.29159		0.27158	0.39923
		0.39364			0.54213	0.66468	0.4084	0.36666		0.28657			0.43209		0.26561	0.34899
		0.49505			0.72942	0.4949	0.27576	0.64652		0.50637			0.4233		0.21039	0.71076
		0.27274			0.51078	0.86567	0.65905	0.64652		0.55608			0.41488		0.36403	0.28497
		0.46102			0.48431	0.67152	0.69941	0.44988		0.40179			0.52149		0.28692	0.50981
		0.2297			0.6131	0.56853	0.35792	0.62665		0.29296			0.4226		0.69412	0.33006
		0.47901			0.47184	0.73962	0.39798	0.58163		0.31135			0.45068		0.29722	0.36242
		0.32935			0.50116	0.37241	0.45136	0.77219		0.4811			0.26079		0.27483	0.24476
		0.21063			0.43809	0.38914	0.33834	0.74735		0.24344			0.3426		0.17479	0.30422
		0.26902			0.31103	0.37128	0.4413	0.56872		0.2735			0.33601		0.5972	0.23154
		0.34299			0.5488	0.44758	0.54533	0.84307		0.32381			0.26116		0.17207	0.20212
		0.28509			0.25438	0.39904	0.40888	0.84307		0.74908			0.20005		0.25297	0.3168
		0.27956			0.7024	0.37849	0.39817	0.87668		0.74908			0.22666		0.18161	0.53921
		0.21341			0.40935	0.77541	0.45097	0.64747		0.34306			1.024		0.23542	0.54186
		0.39539			0.37046	0.32221	0.39468	0.55084		0.26122			0.23268		0.19523	0.26981
		0.33675			0.67524	0.19762	0.47618	0.65053		0.28095			0.40495		0.21016	0.43259
		0.49821			0.60402	0.37379	0.40261	0.6129		0.41768			0.36194		0.59281	0.56146
		0.33645			0.62251	0.21038	0.42077	0.72844		0.22408			0.54523		0.62501	0.45904
		0.47143			0.46095	0.21588	0.49769	0.43629		0.24338			0.37707		0.25396	0.61247
		0.47064			0.36442	0.39905	0.49769	0.53597		0.23689			0.37707		0.55329	0.24688
		0.47849			0.39657	0.27395	0.89171	0.41169		0.21426			0.40272		0.38235	0.39014
		0.36794			0.50649	0.23399	0.45777	0.84099		0.26803			0.25476		0.32444	0.45337
		0.2363			0.39532	0.27362	0.46618	0.84099		0.21971			0.66947		0.25327	0.27848
		0.27573			0.68912	0.43779	0.64013	0.78435		0.19177			0.68768		0.36001	0.30228
		0.25134			0.45108	0.50603	0.70038	0.73041		0.39126			0.65484		0.29038	0.29639
		0.62542			0.68211	0.24949	0.67845	0.63438		0.30226			0.65484		0.37787	0.25548
		0.75966			0.63699	0.39174	0.56499	0.68349		0.45664			0.24582		0.37787	0.42943
		0.33361			0.42722	0.35876	1.174	0.68349		0.3818			0.40128		0.24162	0.2994
		0.65627			0.76166	0.48894	0.73117	0.59689		0.4446			0.79895		0.28441	0.2994
		0.57817			0.27791	0.41944	0.66895	0.57475		0.40544			0.31188		0.26354	0.27368
		0.29746			0.59769	0.60239	0.56492	0.51875		0.36575			0.43292		0.47671	0.24939
		0.29887			0.36422	0.50893	0.59227	0.42274		0.40894			0.70974		0.81451	0.29216
		0.44732			0.4181	0.44328	0.56979	0.55475		0.47866			0.70974		0.16129	0.29216
		0.41294			1.0599	0.45532	0.93618	0.57845		0.3423			0.41352		0.16883	0.3081
		0.34279			1.0599	0.51423	0.41758	0.72573		0.3423			0.39744		0.20502	0.3454
		0.32309			0.55559	0.36691	0.32286	0.76549		0.38233			0.88555		0.2465	0.25541
		0.40476			0.66404	0.42963	0.52743	0.46313		0.66453			0.3901		0.28004	0.41128
		0.40961			0.44013	0.43281	0.62922	0.52427		0.26603			0.45292		0.21857	0.32108
		0.64088			0.32409	0.36162	0.70641	0.87113		0.3236			0.38907		0.25147	0.53073
		0.29526			0.44233	0.66159	0.61804	0.58536		0.27583			0.55836		0.3406	0.77353
		0.4282			0.33496	0.35939	0.62302	0.52979		0.26359			0.56346		0.23367	0.77353
		0.33574			0.53235	0.35939	0.43263	0.62715		0.19101			0.53078		0.28807	0.38176
		0.33025			0.40789	0.30426	0.51581	0.57624		0.30984			0.5709		1.9084	0.32965
		0.72583			0.80427	0.38476	0.42974	0.75027		0.37638			0.42695		0.40343	0.3347
		0.25936			0.78779	0.4895	0.34071	0.74742		0.2107			0.36239		0.48289	0.3347
		0.43286			0.59523	0.70868	1.0684	0.53483		0.28887			0.38187		0.28807	0.40658
		0.32794			0.43634	0.31914	0.6299	0.91576		0.44923			0.18924		0.093162	0.26295
		0.25137			0.54019	0.29903	0.79406	0.7775		0.3554			0.4292		0.29868	0.35825
		0.19838			0.67363	0.29903	0.78372	0.7775		0.26493			0.56958		0.25442	0.25555
		0.27907			0.40963	0.2803	0.6031	1.0137		0.33049			0.36437		0.7795	0.29443
		0.24696			0.46109	0.36198	0.6031	0.82436		0.45105			0.27591		0.28953	0.71683
		0.16779			0.34306	0.45232	0.47815	0.65693		0.4128			0.36146		0.30762	0.46503
		0.19914			0.67456	0.42741	0.72774	0.65536		0.45797			0.88965		1.0378	0.33256
		0.19914			0.49372	0.41065	0.70257	0.62207		0.2852			0.30372		0.65331	0.28266
		0.18121			0.3409	0.46536	0.82371	0.60225		0.2971			0.57471		0.37076	0.36627
		0.2245			0.42745	0.27608	0.7266	0.64161		0.41345			0.36682		0.46599	0.43879
		0.2262			0.64157	0.63921	0.58063	0.50424		0.41345			0.32817		0.44376	0.7778
		0.15341			0.47374	0.49175	0.49386	0.63744		0.20837			0.42608		0.32106	0.503
		0.15503			0.42093	0.34902	0.71283	0.60566		0.30472			0.19428		0.23547	0.27805
		0.18288			0.31861	0.74233	0.79725	0.7183		0.46166			0.23959		0.27525	0.38791
		0.12704			0.63131	0.63498	0.61454	0.76247		0.31211			0.25496		0.53489	0.38118
		0.12067			0.63131	0.47919	0.54557	0.57374		0.42495			0.25354		0.40109	0.5047
		0.35907			0.24486	0.40499	0.57939	0.44655		0.3776			0.2736		0.21749	0.45373
		0.38168			0.33034	0.30785	0.69127	0.41099		0.3776			0.28739		1.2672	0.33257
		0.21407			0.48558	0.87531	1.0589	0.65866		0.33458			0.36751		0.38014	0.29027
		0.281			0.20622	0.333	0.41995	0.60034		0.38586			0.25915		0.14941	0.41711
		0.20191			0.88522	0.44341	0.50398	0.46863		0.24934			0.25958		0.24342	0.28389
		0.25588			0.49017	0.58429	0.63201	0.57996		0.37695			0.1653		0.14372	0.28389
		0.25588			0.3688	0.63847	0.74995	0.68716		0.37695			0.2272		0.42634	0.20542
		0.29537			0.3688	0.58436	0.69676	0.68716		0.36601			0.16059		0.15819	0.28495
		0.26497			0.46492	0.21619	0.7516	0.4736		0.32798			0.19231		0.16128	0.40439
		0.42466			0.4865	0.4458	0.61929	0.43811		0.24637			0.20594		0.16128	0.33007
		0.21421			0.37649	0.49847	0.41219	0.63097		0.24518			0.10607		0.18106	0.43544
		0.25717			0.24764	0.49847	0.65347	0.48435		0.30569			0.23917		0.26745	0.24331
		0.2592			0.41286	0.79877	0.62271	0.43182		0.35235			0.60424		0.15182	0.2741
		0.26026			0.44727	0.27335	0.34803	0.75092		0.18317			0.40582		0.39238	0.36167
		0.55157			0.36511	0.52332	0.395	0.67553		0.33375			0.60778		0.55893	0.37527
		0.47954			0.61233	0.36115	0.27807	0.47338		0.23847			0.41866		0.38823	0.2143
		0.452			0.52607	0.44351	0.71445	0.66446		0.40355			0.46036		0.19117	0.33307
		0.23126			0.58997	0.39738	0.39282	0.66446		0.28114			0.56305		0.21873	0.28557
		0.42058			0.58997	0.4068	0.8203	0.46372		0.20675			0.81819		0.20063	0.81701
		0.29508			0.4298	0.34585	0.35564	0.37921		0.35541			0.94123		0.18766	0.81701
		0.27626			0.68559	0.43585	0.83987	0.47346		0.23794			0.44441		0.16286	0.59041
		0.27961			0.49375	0.31533	0.79868	0.53298		0.27389			0.42526		0.26955	0.30079
		0.46813			0.77263	0.4564	0.45795	0.76767		0.40032			0.56696		0.28133	0.25563
		0.48144			0.49067	0.40539	0.38843	0.44209		0.44677			0.56036		0.44656	0.28495
		0.26945			0.30935	0.40539	0.45576	0.6615		0.53612			0.69161		0.22847	0.13588
		0.30877			0.7461	0.40764	0.73089	0.67869		0.36531			0.67233		0.29789	0.25019
		0.30449			0.54545	0.32779	0.70728	0.65163		0.23			0.54843		0.29789	0.2973
		0.24672			0.3904	0.37198	0.38206	0.47635		0.3607			0.61251		0.28004	0.3547
		0.22201			0.42076	0.59248	1.1614	0.59818		0.3607			0.66283		0.73361	0.30786
		0.3107			0.41492	0.42287	0.65891	0.52712		0.45281			0.9725		0.65357	0.2405
		0.29146			0.41979	0.43464	0.42896	0.57727		0.17469			0.86707		0.28626	0.38269
		0.26148			0.62735	0.41028	1.3433	0.5682		0.26312			0.49861		0.23251	0.42302
		0.39587			0.68091	0.42358	0.50909	0.90556		0.27228			0.95942		0.14885	0.52857
		0.34941			0.66806	0.53138	0.52344	0.54814		0.38511			0.83028		0.25868	0.41995
		0.30707			0.48046	0.3656	0.53225	0.54814		0.22993			0.92491		0.3643	0.71299
		0.51778			0.24523	0.35191	0.89713	0.65616		0.40985			0.69227		0.51559	0.31441
		0.65679			0.23802	0.3284	0.52103	0.4454		0.73225			0.90494		0.51559	0.28118
		0.56447			0.30161	0.42299	0.88371	0.59703		0.21351			0.64275		0.35938	0.29652
		0.33545			0.71103	0.44075	0.56426	0.74579		0.70863			0.56297		0.53731	0.60156
		0.64427			0.30277	0.37766	1.6238	0.54375		0.34827			0.76698		0.53731	0.68132
		0.3009			0.4061	0.39902	0.68322	0.66729		0.48096			0.50862		0.37888	0.83986
		0.27875			0.4249	0.47274	0.35357	0.41174		0.38909			0.3706		0.32861	0.9776
		0.29648			0.53467	0.28536	0.46643	0.7291		0.40151			0.40671		0.79417	0.23197
		0.24316			0.41247	0.3919	0.63254	0.58518		0.40151			0.63135		0.70567	0.14655
		0.44334			0.45944	0.74879	0.59108	0.42315		0.43766			0.71844		0.51493	0.19439
		0.35038			0.71199	0.46349	0.55744	0.59558		0.45888			0.76358		0.26115	0.19399
		0.33367			0.56339	0.35664	0.60915	0.68992		0.46298			0.62504		0.68911	0.49113
		0.24061			0.54598	0.70563	0.36079	0.69715		0.19687			0.69836		1.6248	0.49113
		0.42042			0.29118	0.51567	1.2894	0.49922		0.16681			0.67306		0.39704	0.52172
		0.24536			0.42341	0.60984	0.73209	0.47067		0.17951			0.72758		0.24802	0.25586
		0.49477			0.56465	1.0408	0.78451	0.2891		0.28669			0.97944		0.28916	0.15081
		0.45522			0.29338	0.74428	0.35844	0.49496		0.20123			0.51087		0.46231	0.15874
		0.43426			0.55356	0.4114	0.76675	0.23448		0.30664			0.61906		0.47358	0.19075
		0.30827			0.67606	0.41632	0.65154	0.39646		0.29938			0.99511		0.32818	0.22817
		0.81364			0.34303	0.66705	0.5317	0.29742		0.20031			1.1592		0.21659	0.18631
		0.2697			0.76699	0.66705	0.33901	0.32169		0.35637			0.38187		0.29532	1.0711
		0.1845			0.63161	0.66643	0.47007	0.29441		0.38653			0.44264		0.28934	0.80584
		0.22215			0.68468	0.62619	0.57125	0.44187		0.27567			0.60471		0.42301	0.196
		0.39492			0.51587	0.38598	1.2196	0.52283		0.21726			0.82825		0.17204	0.17261
		0.34911			0.38023	0.44942	0.35294	0.56666		0.4178			0.50845		0.59318	0.32089
		0.24363			0.38591	0.54731	0.5126	0.35148		0.36423			0.49908		0.3512	0.1902
		0.24363			0.57194	0.56013	0.59747	0.40035		0.48969			0.5994		0.56274	0.1972
		0.25653			0.45755	0.4291	0.56861	0.42234		0.1531			0.68724		0.38105	0.2189
		0.24631			0.22141	0.43225	0.71489	0.34782		0.17441			0.56845		0.17038	0.14573
		0.68101			0.47362	0.28898	0.36571	0.33196		0.35168			0.3932		0.34579	0.23438
		0.19001			0.45842	0.40009	0.55475	0.59772		0.18613			0.61126		0.24527	0.79715
		0.3423			0.45989	0.43304	0.85462	0.44115		0.18613			0.52114		0.41132	0.33455
		0.24334			0.47618	0.63277	0.58362	0.38345		0.1917			0.72811		0.51799	0.2209
		0.88828			0.5813	0.86178	0.76945	1.1056		0.5973			0.45395		0.31119	0.27264
		0.43906			0.4426	0.91112	0.70573	0.77755		0.41163			0.5553		0.37819	0.18168
		0.18535			0.45243	0.91112	0.49904	0.46541		0.20762			0.4611		0.27724	0.16694
		0.33106			0.50086	0.5332	0.57206	0.46541		0.21561			0.58931		0.31132	0.19979
		0.46436			0.27772	0.51529	0.42178	0.48419		0.3707			0.45498		0.44786	0.38406
		0.35433			0.57115	0.45921	0.51186	0.32602		0.27422			0.53299		0.60228	0.36741
		0.31586			0.61773	0.37694	0.58955	0.30835		0.31593			0.60776		0.42124	0.34841
		0.32154			0.8332	0.86737	0.57328	0.64517		0.33241			0.78281		0.20174	0.17565
		0.71352			0.54416	0.66105	0.49835	0.64517		0.25116			0.78281		0.52933	0.18139
		0.44534			0.26543	0.45334	1.2374	0.49525		0.26083			1.0232		0.38925	0.17035
		0.32371			0.41805	0.52398	0.59602	0.33979		0.48898			0.62103		0.46316	0.18959
		0.42033			0.56194	0.52174	1.0171	0.31091		0.3163			0.57245		0.53868	0.12411
		0.46408			0.31242	1.2152	1.1298	0.52406		0.30143			0.60678		0.6061	0.27172
		0.28537			0.4453	0.85233	0.33155	0.59212		0.75589			0.48321		0.43993	0.19295
		0.25181			0.58933	0.59814	0.58414	0.46421		0.28337			0.44923		0.23798	0.1514
		0.25181			0.41051	0.45257	0.80562	0.38934		0.1861			0.32708		0.41	0.1761
		0.25181			0.65867	0.61173	0.63673	0.50144		0.43852			0.34851		0.37159	0.19853
		0.3455			0.78746	0.58497	0.53343	0.53492		0.37626			0.41765		0.33553	0.14853
		0.35807			0.35815	0.73401	0.62911	0.55672		0.36325			0.54235		0.36426	0.81062
		0.39923			0.47394	0.73669	1.2491	0.48714		0.44279			0.87627		0.2728	0.32071
		0.38954			0.60004	0.38508	1.0944	0.40947		0.38216			0.43576		0.23391	0.48763
		0.34371			0.53374	0.43126	0.71281	0.40703		0.55801			0.50922		0.46606	0.49765
		0.21451			0.43677	0.41645	0.49352	0.40703		0.43786			0.41912		0.27235	1.554
		0.36829			0.61756	0.33686	1.0828	0.47592		0.5892			0.38128		0.26425	0.40344
		0.45516			0.73929	0.29458	0.56443	0.36538		0.30059			0.43084		0.29818	0.38838
		0.54968			0.88603	0.55037	0.5603	0.41412		0.38778			0.27621		0.33523	0.48149
		0.13816			0.36948	0.60176	1.1705	0.6874		0.57213			0.70295		0.67953	0.38838
		0.53814			0.60876	0.37688	0.93941	0.66546		0.43016			0.71521		0.37242	1.0285
		0.23677			0.45418	0.37484	0.88406	0.48225		0.37618			0.54499		0.29789	0.52036
		0.3288			0.63139	0.34741	0.47325	0.37541		0.40137			0.64538		0.43266	0.52036
		0.28847			0.68972	0.44597	0.69958	0.29164		0.35531			0.47916		0.34258	0.62156
		0.25021			0.49552	0.37441	0.53059	0.35791		0.36628			0.36731		0.24199	0.40036
		0.22842			0.40343	0.68177	0.95543	0.25002		0.33052			0.67928		0.50714	0.32986
		0.32343			0.54007	0.61139	0.39391	0.34937		0.2606			0.43958		0.47869	0.37013
		0.36122			0.67444	0.77734	0.4934	0.32816		0.38033			0.41021		0.34533	0.37047
		0.29581			0.59395	0.44288	0.67525	0.44687		0.25695			0.4182		0.2978	0.32385
		0.32143			0.56349	0.4354	0.39617	0.94625		0.33233			0.46505		0.25405	0.49278
		0.32147			0.31199	0.40389	0.71113	0.69797		0.53818			0.44276		0.48869	0.41989
		0.32147			0.3638	0.29561	1.4078	0.42773		0.55478			0.39076		0.38489	0.34987
		0.29501			0.43036	0.37758	0.54639	0.43161		0.33778			0.45292		0.24799	0.3673
		0.24884			0.42314	0.428	0.97228	0.35144		0.35776			0.42188		0.23704	0.45063
		0.30738			0.21745	0.51647	0.62468	0.40847		0.39025			0.48718		0.53058	0.33754
		0.30291			0.66428	0.81117	0.67399	0.40943		0.19863			0.48718		0.51405	0.43707
		0.28637			0.34382	0.82882	0.32421	0.32454		0.29263			0.411		0.45015	0.36554
		0.3566			0.33934	0.47901	0.27317	0.96617		0.31448			0.45646		0.24753	0.35579
		0.33392			0.45504	0.30747	0.38402	0.79478		0.29767			0.58888		0.43456	0.36294
		0.39996			0.74799	0.24902	0.32353	0.56657		0.3905			0.57094		0.39268	0.50096
		0.27316			0.31872	0.28749	0.44053	0.59429		0.19797			0.52393		0.45373	0.50302
		0.19358			0.68835	0.75429	0.44064	0.51515		0.2349			0.50036		0.25972	0.36303
		0.25716			0.54935	0.47626	0.44064	0.44356		0.30497			0.50036		0.35298	0.35486
		0.25842			0.37713	0.33791	0.23521	0.91177		0.30497			0.38925		0.38184	0.6411
		0.55251			0.89202	0.45838	0.71713	0.67091		0.23855			0.27816		0.2695	0.42288
		0.50684			0.4318	0.33072	0.47684	0.8456		0.31455			0.38349		0.89984	0.88612
		0.32341			0.34214	0.40437	0.77234	0.45725		0.29036			0.51055		0.89984	0.21987
		0.25121			0.38212	1.0747	0.71777	0.50685		0.29036			0.21117		0.75903	0.43374
		0.41581			0.41171	0.29345	0.36096	0.67752		0.76019			0.50842		0.34761	0.60725
		0.70855			0.42125	0.34039	0.31667	1.3228		0.19696			0.50873		0.31326	0.244
		0.56831			0.49217	0.45953	0.32568	0.52808		0.32298			0.45507		0.32808	0.25167
		0.42058			0.49952	0.5166	0.49353	0.58461		0.43725			0.45507		0.30471	0.17369
		0.50485			0.60429	0.29495	0.50816	0.34265		0.43524			0.65513		0.28796	0.50817
		0.39947			0.41482	0.42878	0.39487	0.80988		0.22719			0.22268		0.22964	0.32425
		0.39947			0.38365	0.41596	0.38899	0.94624		0.29249			0.14667		0.48063	0.26231
		0.43362			0.45562	0.39987	0.48103	0.70709		0.21871			0.19415		0.40374	0.26231
		0.2186			0.38972	0.49563	0.51129	0.37622		0.22202			0.41626		0.36244	0.23746
		0.27338			0.59723	0.29034	0.29482	0.33158		0.2286			0.26962		0.26343	0.212
		0.27121			0.24914	0.45871	0.41759	0.27383		0.23142			0.42691		0.26343	0.19516
		0.28086			0.26844	0.66984	0.37875	0.39114		0.13602			0.34351		0.2593	0.26638
		0.42822			0.4582	0.30816	0.33852	0.44056		0.52629			0.22854		0.22146	0.16791
		0.31029			0.70853	0.52395	0.46773	0.48484		0.44255			0.26056		0.24214	0.25015
		0.38113			0.47834	0.73024	0.45521	0.43196		0.42211			0.43197		0.26658	0.44663
		0.27402			0.47353	0.90352	0.45521	0.52177		0.38663			0.1855		0.39858	1.3769
		0.44051			0.50974	0.87535	0.60496	0.57732		0.5271			0.29288		0.39346	0.49447
		0.48577			0.33139	0.72789	0.69362	0.46461		0.56422			0.21551		0.4231	0.46362
		0.33456			0.31125	0.24978	0.37789	0.87288		0.29165			0.33482		0.33859	0.43692
		0.16355			0.37261	0.55402	0.47113	0.30101		0.39869			0.60482		0.39319	0.45026
		0.21632			0.70653	0.45224	0.56782	0.39859		0.39869			0.3277		0.39319	0.43388
		0.49954			0.63846	0.71205	0.38762	0.35717		0.63168			0.3277		0.22679	0.52988
		0.46988			0.65392	0.819	0.25704	0.29438		0.49868			0.35159		0.2219	0.62817
		0.50496			0.37626	0.67804	0.33113	0.37		0.53419			0.2254		0.28257	0.37864
		0.27649			0.42102	0.56436	1.1479	0.41456		0.57964			0.29967		0.42123	0.20029
		0.74502			0.31303	0.63704	0.78773	0.41456		0.35781			0.24615		0.21332	0.14721
		0.35956			0.4374	0.39641	0.34944	0.472		0.33347			0.26272		0.34905	0.35451
		0.3011			0.56936	0.36745	0.39483	0.61627		0.16976			0.33063		0.53695	0.25045
		0.21711			0.38775	0.72408	0.28499	0.4795		0.36804			0.37144		0.41996	0.28945
		0.33243			0.35929	1.1197	0.97683	0.4986		0.54697			0.24383		0.56072	0.2952
		0.2987			0.39412	0.41334	0.42512	0.49869		0.3028			0.39803		0.32475	0.246
		0.2538			0.45363	0.42682	0.41838	0.27294		0.26957			0.26128		0.76213	0.22067
		0.19488			0.33329	0.34265	0.38247	0.39186		0.27777			0.42618		0.30509	0.19813
		0.28355			0.61425	0.49868	0.27588	0.36849		0.25645			0.544		0.38866	0.22215
		0.19262			0.28444	0.79104	0.19221	0.40702		0.37431			0.38838		0.26653	0.18937
		0.41222			0.49564	0.76607	0.58941	0.37535		0.2951			0.23544		0.3067	0.24583
		0.32927			0.39292	1.1354	0.35669	0.22255		0.23267			0.25656		0.32456	0.17503
		0.63021			0.34921	0.4548	0.79596	0.31196		0.2907			0.24927		0.33941	0.15704
		0.66848			0.36277	0.66709	0.34998	0.66136		0.39467			0.28611		0.82552	0.22526
		0.443			0.28527	1.6144	0.36122	0.40449		0.40055			0.26192		0.82552	1.0398
		0.35586			0.43728	0.37383	0.27924	0.38368		0.17694			0.23574		0.53796	0.44231
		0.26503			0.23874	0.64831	0.3945	0.82729		0.23033			0.29234		0.29286	0.28828
		0.29975			0.74173	0.49869	0.37163	0.37152		0.23778			0.24488		0.2626	0.26829
		0.38914			0.42793	0.80637	0.36703	0.4592		0.30187			0.32576		0.22703	0.28348
		0.37452			0.52517	0.70656	0.63575	0.4044		0.25157			0.31923		0.27371	0.18837
		0.25421			0.52517	0.65753	0.5324	0.33258		0.19489			0.20502		0.28893	0.24566
		0.24819			0.52288	0.56918	0.50292	0.30891		0.2317			0.21862		0.43742	0.21503
		0.38043			0.40871	0.48199	0.32642	0.57182		0.20783			0.17994		0.49073	0.23235
		0.31698			0.51853	0.82436	0.39383	0.35667		0.20746			0.14399		0.22225	0.42425
		0.56879			0.45939	0.6377	0.33841	0.48138		0.33058			0.13886		0.64877	0.27634
		0.48173			0.59105	0.56799	0.62858	0.3518		0.25955			0.22729		0.34162	0.18604
		0.52252			0.53117	0.36593	0.27433	0.43229		0.45378			0.16072		0.42119	0.21297
		0.67977			0.56129	0.36469	0.49154	0.47352		0.45378			0.20754		0.16829	0.32559
		0.41006			0.43729	0.96286	0.35163	0.49788		0.41565			0.21778		0.27285	0.27394
		0.39315			0.57789	1.073	0.39834	0.43723		0.36203			0.43369		0.27104	0.30841
		0.38102			0.47016	1.3515	0.2883	0.36652		0.34792			0.22093		0.20426	0.28519
		0.39753			0.34108	1.5968	0.28795	0.34691		0.21527			0.22944		0.33719	0.28519
		0.43884			0.41591	0.79333	0.38937	0.83157		0.30359			0.18361		0.54372	0.31289
		0.30564			0.38971	0.77144	0.32401	0.90063		0.29917			0.19709		0.29133	0.18916
		0.64285			0.40569	0.56507	0.41305	0.46715		0.2345			0.20594		0.20021	0.17553
		0.32417			0.38548	1.0616	0.42229	0.46715		0.43445			0.13158		0.45615	0.30566
		0.32947			0.3916	1.0793	0.38039	0.45045		0.15912			0.18347		0.83012	0.35625
		0.42811			0.65612	0.67411	0.50838	0.40996		0.22131			0.28155		0.39105	0.1844
		0.35562			0.45786	0.55559	0.46373	0.40996		0.34157			0.2261		0.46583	0.16088
		0.35562			0.45786	0.77492	1.1126	0.35153		0.65993			0.31286		0.25511	0.26774
		0.33885			0.17616	0.42401	1.0683	0.42252		0.27119			0.39676		0.25834	0.18728
		0.31556			0.53162	0.58782	0.46294	0.32734		0.31007			0.40525		0.28227	0.17567
		0.43588			0.56308	0.68713	0.98622	0.32734		0.31007			0.36189		0.23581
		0.2638			0.31901	0.63983	0.46121	0.28551		0.18751			0.46752		0.17258	0.38523
		0.33891			0.50073	0.37421	0.69924	0.48135		0.3139			0.45284		0.25317	0.42037
		0.25581			0.56104	0.60935	0.68126	0.47175		0.29685			0.41952		0.51288	0.25052
		0.28604			0.2936	0.50225	0.34696	0.47175		0.64181			0.40948		0.69341	0.63263
		0.22151			0.45591	0.64568	0.40148	0.40094		0.32845			0.37398		1.0205	0.36462
		0.20288			0.40477	0.65312	0.6343	0.37124		0.58564			0.40793		0.73735	0.43145
		0.58632			0.43936	0.41709	0.36509	0.39479		0.23772			0.95497		0.53567	0.46311
		0.38688			0.29401	0.83721	0.52737	0.29951		0.1869			0.29539		0.66625	0.5893
		0.38688			0.39097	0.86047	1.4945	0.51888		0.17269			0.46611		0.79056	0.44636
		0.38688			0.49349	0.50191	0.77285	0.40362		0.2317			0.45598		0.49947	0.69084
		0.37535			0.75088	0.52887	1.6747	0.34206		0.33754			0.23995		0.54294	0.31732
		0.31551			0.29156	0.81221	0.5698	0.41001		0.30181			0.34629		0.3421	0.38925
		0.38622			0.5486	1.0561	1.0283	0.21526		0.22075			0.46138		0.48666	0.65758
		0.33142			0.37429	0.76556	1.0873	0.40831		0.27468			0.53414		0.86838	0.35751
		0.22208			0.38937	0.70169	0.57726	0.44772		0.34668			0.32582		0.85145	0.42733
		0.22726			0.41245	0.6926	0.66102	0.38606		0.38032			0.3		0.63548	0.60515
		0.2538			0.35474	0.55733	0.44045	0.41812		0.25816			0.51851		0.52774	0.48155
		0.22984			0.34887	0.48368	0.76491	0.41006		0.32487			0.50799		0.71116	0.6658
		0.39643			0.26208	0.58243	0.69607	1.103		0.22117			0.35207		0.70861	0.49393
		0.55384			0.4794	0.3295	0.62626	0.43607		0.19528			0.28836		0.91276	0.27586
		0.55384			0.45858	0.83837	0.4332	0.56622		0.45279			0.27433		0.79287	0.41347
		0.3994			0.51619	0.48939	0.62952	0.4507		0.18382			0.24685		0.97149	0.44134
		0.36112			0.36873	0.6129	0.93546	0.57862		0.57197			0.5511		0.57366	0.41862
		0.43535			0.43032	0.45027	0.54452	0.3948		0.19235			0.5937		0.54729	0.40422
		0.2839			0.37313	0.38297	0.95132	0.75345		0.70731			0.43292		0.68648	0.30697
		0.48651			0.28465	2.1695	0.65638	0.54897		0.27795			0.33014		0.45454	0.45453
		0.37198			0.22941	0.34699	0.59003	0.46023		0.18256			0.32721		0.44027	0.5571
		0.42542			0.2888	0.31611	0.89684	0.51476		0.3576			0.35285		0.52447	0.24295
		0.31953			0.29603	0.33196	0.49139	0.35102		0.47581			0.40226		0.53541	0.5965
		0.52787			0.23674	0.31101	0.82524	0.30712		0.24246			0.24994		0.39056	0.28216
		0.28608			0.28484	0.26695	0.79134	0.34217		0.2212			0.37868		0.90226	1.262
		0.41524			0.32839	0.84859	0.62063	0.57014		0.24371			0.3255		0.47216	0.43098
		0.3515			0.32839	0.64684	0.52314	0.29274		0.26816			0.3504		0.61423	0.77499
		0.3805			0.17092	0.30496	0.9231	0.36646		0.28018			0.33509		0.40068	0.48857
		0.30244			0.26266	0.27743	0.92584	0.44747		0.28288			0.2508		0.6024	0.34077
		0.48528			0.36372	0.47296	0.823	0.40845		0.27365			0.20393		0.67483	0.3466
		0.45991			0.34697	0.39156	1.0205	0.41541		0.28262			0.33182		0.61302	0.31341
		0.378			0.50609	0.46509	0.34427	0.43895		0.35856			0.25316		0.39058	0.35796
		0.27394			0.22697	0.29851	1.5266	0.32908		0.34448			0.44446		0.40509	0.42053
		1.1469			0.18608	0.28423	0.64873	0.39178		0.3164			0.32081		0.3703	0.25891
		1.1803			0.2252	0.46564	0.43735	0.59514		0.32729			0.24615		0.56973	0.25891
		0.3753			0.19444	0.48317	0.45382	0.39133		0.13239			0.3355		0.56973	0.16274
		0.35573			0.37637	0.42867	0.57471	0.45004		0.1065			0.33628		0.56973	0.41974
		0.43522			0.25917	0.3542	0.42937	0.34222					0.28938		0.74455	0.64904
		0.56484			0.3141	0.23958	0.69936	0.4878					0.28945		0.35022	0.25849
		0.46379			0.26147	0.20292	0.77065	0.47027					0.39448		0.51892	0.25027
		0.29375			0.25504	0.37166	0.37529	0.32007					0.66142		0.68974	0.40754
		0.25798			0.30307	0.53114	0.51345	0.3475					0.50268		0.51799	1.3902
		0.18017			0.29951	0.53114	0.54833	0.52974					0.27232		0.51799	1.3902
		0.23485			0.2511	0.58322	0.59714	0.35773					0.57359		0.49193	0.23711
		0.19992			0.18269	0.58031	0.95758	0.43739					0.46259		0.48144	0.23248
		0.53119			0.19383	0.43947	0.52078	0.3245					0.40425		0.48685	0.12463
		0.31987			0.22386	0.28987	0.802	0.34321					0.3537		0.61173	0.38389
		0.32554			0.29203	0.30571	0.44657	0.4899					0.424		0.47173	0.12275
		0.29416			0.29203	0.34675	0.38755	0.28807					0.23275		0.43125	0.24638
		0.27213			0.22224	0.35095	0.87917	0.68018					0.25355		0.4229	0.27774
		0.43289			0.2153	0.43232	0.80105	0.61573					0.33867		0.9241	0.31695
		0.70575			0.38321	0.18656	0.58979	0.33794					0.39933		0.46131	0.22258
		0.41388			0.25324	0.42145	1.0224	0.42123					0.23236		0.34365	0.24313
		0.52855			0.27715	0.47065	0.66787	0.36011					0.30149		0.40592	0.22282
		0.43676			0.30951	0.2302	0.71612	0.34017					0.17491		0.48238	0.22282
		0.38226			0.25964	0.28265	0.68963	0.27823					0.27156		0.42635	0.21436
		0.38226			0.30768	0.26762	0.79589	0.31994					0.26639		0.48721	0.22348
		0.45233			0.56997	0.25567	0.78743	0.62914					0.23529		0.65362	0.26482
		0.53909			0.36309	0.36523	1.5825	0.5595					0.37723		0.65362	0.14936
		0.3184			0.4978	0.33349	0.58405	0.47987					0.38477		0.45881	0.19134
		0.39639			0.26509	0.33349	0.83051	0.92107					0.48238		0.82636	0.13831
		0.35367			0.43359	0.36696	0.72906	1.035					0.46282		0.84443	0.14531
		0.30618			0.41991	0.39115	1.0326	0.49552					0.27235		0.35514
		0.45966			0.50559	0.28545	0.36429	0.33772					0.25761		0.54505
		0.39159			0.51239	0.35456	0.64603	0.71212					0.45114		0.54505
		0.39076			0.36224	0.47246	0.30515	0.5068					0.38903		0.426
		0.33941			0.5095	0.72685	0.71724	0.49919					0.40038		0.57095
		0.43643			0.51729	1.0268	0.67833	0.37029					0.16888		0.46656
		0.4564			0.31084	1.1036	0.32789	0.41033					0.47198		0.48072
		0.32238			0.34349	0.98485	0.32789	0.33668					0.42884		0.44346
		0.32366			0.67008	0.28803	0.34538	0.54916					0.42884		0.50088
		0.26494			0.66904	0.63302	0.37881	0.58856					0.26016		0.83117
		0.31662			0.47521	0.68118	1.1027	0.65463					0.22783		0.66482
		0.37838			0.49983	0.68118	1.1395	0.65463					0.24182		0.60259
		0.20161			0.53062	0.37979	0.84031	0.55889					0.32985		0.65655
		0.33521			0.41611	0.3224	0.41717	0.36598					0.3578		0.58463
		0.33521			0.75654	0.26929	0.56331	0.36598					0.29431		0.45797
		0.62731			0.65108	0.35912	0.77724	0.5327					0.30903		0.52361
		0.38964			0.91719	0.28519	0.50282	0.60047					0.2501		0.40439
		0.44344			0.27254	0.34057	1.4098	0.57617					0.20112		0.40439
		0.4934			0.83923	0.26029	0.53574	0.35659					0.29802		0.50777
		0.30685			0.42968	0.66882	0.89548	0.39257					0.14863		0.50777
		0.30685			0.33734	0.59411	0.42903	0.47679					0.2662		0.5827
		0.27689			0.59312	0.43381	0.92986	0.36274					0.57953		0.5827
		0.31991			0.44727	0.79235	0.58743	0.56806					0.28669		0.5141
		0.32704			0.49389	0.55244	0.67397	0.39632					0.49717		0.4878
		0.36284			0.4576	1.1138	1.2276	0.38308					0.38529		0.60612
		0.40652			0.45933	0.71868	0.56164	0.40594					0.26633		0.60612
		0.35063			0.61358	0.50816	0.60032	0.51991					0.34613		0.94549
		0.5754			0.84951	0.40363	0.65535	0.55973					0.31303		0.81721
		0.35884			0.38517	0.43074	0.57349	0.411					0.25055		0.60298
		0.23332			0.40452	0.35774	0.5623	0.47519					0.33602		0.33684
		0.99367			0.65325	0.58509	0.68478	0.5086					0.3483		0.33684
		0.28371			0.65325	0.87513	0.57039	0.76478					0.33437		0.29395
		0.32675			0.49067	0.56969	0.35147	0.59113					0.37816		0.35148
		0.40183			0.42956	0.86209	0.43515	0.58229					0.353		0.35148
		0.74468			0.35127	0.15488	0.59997	0.72968					0.28219		0.49154
		0.46826			0.35127	0.46405	0.58215	0.32342					0.29765		0.77961
		0.59551			0.4678	0.35174	0.75385	0.48274					0.27579		0.93698
		0.59551			0.32775	0.2593	0.4764	0.43808					0.38708		0.41721
		0.49483			0.40626	0.2593	0.76501	0.37563					0.48991		0.57452
		0.44741			0.33044	0.23154	0.76501	0.33294					0.33903		0.50922
		0.31467			0.44566	0.26049	0.71166	0.58911					0.24093		0.28704
		0.42811			0.279	0.26049	0.90783	0.58911					0.41922		0.44648
		0.47622			0.30007	0.25256	1.1387	0.34085					0.23441		0.3863
		0.47622			0.6781	0.20097	0.48937	0.54946					0.53537		0.68176
		0.7234			0.51726	0.2795	0.51684	0.61606					0.21634		0.44065
		0.39866			0.38987	0.34419	1.1171	0.8768					0.25376		0.47475
		0.21666			0.41744	0.2735	0.97088	0.65415					0.28391		0.59412
		0.25796			0.37782	0.2735	0.37673	0.49681					0.24132		0.40981
		0.47959			0.31834	0.31433	0.84121	0.41728					0.25229		0.40593
		0.24894			0.65364	0.21754	1.0653	0.64017					0.3208		0.38059
		0.29219			0.39578	0.28324	0.84585	0.53845					0.43207		0.54758
		0.4863			0.47047	0.18202	0.91217	0.42279					0.35542		0.62935
		0.47367			0.44336	0.25352	1.1114	0.42302					0.3224		0.60105
		0.43953			0.2852	0.25601	0.58437	0.42302					0.32663		0.30176
		0.32997			0.26192	0.3446	0.41506	0.67416					0.48739		0.39964
		0.32343			0.47915	0.34334	0.35293	0.56498					0.24748		0.44604
		0.36878			0.68865	0.2888	0.51136	0.50943					0.31182		0.72303
		0.39048			0.40145	0.30924	0.64721	0.50943					0.50976		0.73096
		0.72635			0.38511	0.36824	0.47842	0.49015					0.50543		0.21119
		0.68339			0.3899	0.41126	0.52107	0.43786					0.50543		0.35943
		0.3708			0.53237	0.24797	0.43712	0.42995					0.38117		0.47692
		0.62731			0.40529	0.23535	0.4301	0.26817					0.27761		0.9392
		0.29496			0.47317	0.40992	1.1212	0.47854					0.28721		0.3134
		0.2485			0.50436	0.47075	0.749	0.55092					0.35141		0.4778
		0.28394			0.66535	0.53076	0.4364	0.41901					0.44669		0.48057
		0.30912			0.41906	0.39309	0.45226	0.41901					0.3292		0.32862
		0.25336			0.48006	0.22225	0.45226	0.47694					0.36556		0.51548
		0.2874			0.4316	0.26218	0.45226	0.55949					0.36559		0.48463
		0.30788			0.4713	0.30557	0.48086	0.39335					0.5846		0.33825
		0.48962			0.43191	0.47871	0.31091	0.60235					0.5846		0.3587
		0.30376			0.40796	0.29538	0.58046	0.45082					0.56524		0.4155
		0.4604			0.42913	0.36673	0.56173	0.45813					0.31495		0.37368
		0.45814			0.38644	0.32837	0.43539	0.54817					0.31009		0.4641
		0.41806			0.38644	0.41823	0.81737	0.61365					0.27898		0.48381
		0.41806			0.60692	0.34848	0.47032	0.55871					0.32673		0.72496
		0.21087			0.33958	0.34182	0.75794	0.55871					0.33826		0.57063
		0.26949			0.48384	0.37916	1.1929	0.55871					0.26035		0.53418
		0.26398			0.55246	0.28432	1.0551	0.44498					0.18267		0.38827
		0.16175			0.78258	0.26485	0.51788	0.90419					0.16472		0.30303
		1.2699			0.44712	0.20442	0.47885	0.57992					0.20245		0.54649
		0.53857			0.38144	0.39688	0.51652	0.64514					0.24676		0.36622
		0.28306			0.40326	0.49288	0.69923	0.59534					0.1856		0.36454
		0.26662			0.3384	0.29344	0.53847	0.69654					0.31318		0.41779
		0.26662			0.42435	0.37163	0.36487	0.70705					0.29821		0.41779
		0.47184			0.28408	0.52753	0.94673	0.70705					0.31256		0.54778
		0.23736			0.50486	0.61249	0.38124	0.57793					0.35923		0.76714
		0.7078			0.55834	1.0776	0.53726	0.68577					0.31617		0.40947
		0.23459			0.76808	0.75398	0.48403	0.61376					0.26345		0.61147
		0.22741			0.44007	0.65312	0.5489	0.44568					0.18993		0.54608
		0.62008			0.33213	0.26534	0.42638	0.26258					0.18283		0.36558
		0.57461			0.53279	0.29248	0.3925	0.55446					0.18283		0.6255
		0.26668			0.29013	0.26626	0.53602	0.43754					0.20328		0.86636
		0.28755			0.29096	0.36184	0.74042	0.44594					0.22472		0.39465
		0.37555			0.53332	0.24272	0.51747	0.42615					0.14341		0.61222
		0.37555			0.29094	0.49499	0.34416	0.36811					0.26674		0.59919
		0.3574			0.57007	0.27408	0.4274	0.54457					0.14183		0.50503
		0.3574			0.43885	0.27408	0.59103	0.81126					0.40439		0.61989
		0.27537			0.38982	0.44319	0.43497	0.56821					0.30093		0.38424
		0.58858			0.61971	0.37953	0.44538	0.42344					0.24599		0.2637
		0.53889			0.71989	0.39799	0.40933	0.61702					0.55613		0.34047
		0.47326			0.53758	0.30828	0.60989	0.75644					0.33976		0.33823
		0.20878			0.44908	0.36382	0.60834	0.75644					0.22344		0.55064
		0.44659			0.66251	0.4669	0.51026	0.52391					0.33484		0.4831
		0.23652			0.36953	0.33066	0.83199	0.6177					0.18366		0.60042
		0.37851			0.47902	0.37044	0.39293	0.57419					0.21936		0.26659
		0.27989			0.47293	0.34306	0.37	0.46254					0.55301		0.36268
		0.20234			0.46077	0.51239	0.45573	0.37641					0.33304		0.40551
		0.61716			0.38288	0.40772	0.75509	0.3994					0.46685		0.36214
		0.33553			0.31681	0.494	0.7995	0.31961					0.6191		0.32977
		0.22419			0.28445	0.46252	0.63882	0.43616					0.2346		0.41424
		0.30232			0.44849	0.83436	0.6022	0.39927					0.2278		0.26899
		0.34617			0.4919	0.75967	0.50756	0.61282					0.31039		0.26899
		0.34179			0.71782	0.48999	0.57312	0.42737					0.2438		0.82763
		0.30394			0.5161	0.51722	0.62161	0.69605					0.50813		0.47385
		0.327			0.57111	0.24239	0.44492	0.56962					0.20331		0.42963
		0.67384			0.23948	0.43011	0.36167	0.66235					0.32887		0.23454
		0.60985			0.39992	0.39299	0.46582	0.85263					0.42061		0.40922
		0.6057			0.39992	0.28637	0.35217	0.77745					0.32004		0.6905
		0.57894			0.49899	0.26776	0.39436	0.42602					0.31496		0.33792
		0.17012			0.36722	0.36321	0.53007	0.43267					0.36671		0.49617
		0.30119			0.33205	0.49086	0.34806	0.80875					0.23318		0.5909
		0.3413			0.43882	0.40303	0.52059	0.29836					0.20853		0.5223
		0.39077			0.42434	0.40303	0.26918	0.34944					0.40594		0.47534
		0.31872			0.66272	0.27612	0.33383	0.52425					0.2683		0.3135
		0.3391			0.37781	0.42479	0.89726	0.40859					0.25162		0.34527
		0.30275			0.40658	0.35179	0.56427	0.33272					0.33745		0.36938
		0.37843			0.7089	0.21731	0.60762	0.40437					0.41657		0.23766
		0.33613			0.5156	0.4309	0.34921	0.62817					0.34155		0.31451
		0.40104			0.61176	0.56392	0.70115	0.34211					0.23924		0.23291
		0.45287			0.89323	0.78336	0.41899	0.53479					0.27372		0.41629
		0.50265			0.52126	0.8904	0.61816	0.47586					0.35242		0.55654
		0.42577			0.5077	0.3021	0.66115	0.47586					0.24169		0.36398
		0.42577			0.46627	0.28621	0.75591	0.52841					0.29784		0.53195
		0.27921			0.20267	0.49918	0.4929	0.46157					0.28142		0.46411
		0.17432			0.2732	0.25453	0.45212	0.36073					0.16678		0.48698
		0.22453			0.28051	0.31192	0.34983	0.4322					0.41468		0.53668
		0.22453			0.3378	0.35834	0.51231	0.42249					0.35128		0.17149
		0.21415			0.36696	0.35834	0.45805	0.32497					0.31626		0.32403
		0.20701			0.33083	0.34914	0.47369	0.96804					0.17955		0.41063
		0.28253			0.41857	0.93939	0.47193	0.52769					0.19436		0.29111
		0.24161			0.31893	0.2662	0.63366	0.37377					0.42091		0.44812
		0.21724			0.4952	0.22117	0.47924	0.48646					0.22025		0.33159
		0.3457			0.59123	0.32358	0.48535	0.49242					0.30452		0.21528
		0.28049			0.72982	0.24644	0.32816	0.44107					0.29953		0.45588
		0.2816			0.43586	0.2219	0.5898	0.59676					0.36516		0.40127
		0.39918			0.48179	0.42411	0.30829	0.68345					0.28656		0.27565
		0.45523			0.25285	0.43577	0.30829	0.47611					0.23762		0.27565
		0.38235			0.25547	0.26235	0.27881	0.47306					0.40663		0.40802
		0.47699			0.47701	0.25931	0.44952	0.64641					0.30044		0.28316
		0.26369			0.39501	0.49192	0.38531	0.94462					0.33505		0.55998
		0.30219			0.29861	0.28311	0.38448	1.5223					0.33505		0.83951
		0.32397			0.2885	0.29189	0.6171	1.2687					0.17074		1.0395
		0.39753			0.29054	0.3247	0.30296	0.46344					0.23382		0.45635
		0.36584			0.34567	0.28023	0.29502	0.49374					0.27002		0.66708
		0.37392			0.27036	0.34432	0.26099	0.37762					0.16201		0.2977
		0.22997			0.41989	0.24919	0.33244	0.49328					0.18968		0.49794
		0.25875			0.45398	0.35109	0.35825	0.327					0.31941		0.41075
		0.21705			0.33632	0.25866	0.65505	0.37754					0.26427		0.2358
		0.31649			0.36284	0.25979	0.62091	0.3997					0.26427		0.2358
		0.21601			0.58801	0.40024	0.62091	0.40644					0.18751		0.36278
		0.25279			0.24583	0.22986	0.50408	0.31724					0.19857		0.61837
		0.32984			0.37208	0.33664	0.42742	0.37423					0.19857		0.61837
		0.29943			0.87535	0.227	0.53492	0.49966					0.1963		0.46247
		0.5576			0.59595	0.26405	0.592	0.45164					0.19686		0.29918
		0.35174			0.2307	0.44485	0.48433	0.45164					0.20213		1.4511
		0.31834			0.43837	0.47278	0.48569	0.38177					0.14774		0.99099
		0.30243			0.3754	0.53159	0.33818	0.4663					0.25322		0.34151
		0.22978			0.3754	0.20116	0.57506	0.41682					0.3127		0.37344
		0.33889			0.42113	0.29993	0.40415	0.67073					0.33481		0.4329
		0.28964			0.35375	0.33537	0.39894	0.67073					0.45664		0.41443
		0.26373			0.4812	0.52338	0.3632	0.53594					0.4858		0.3277
		0.36308			0.39279	0.32582	0.35363	0.53594					0.28027		0.24177
		0.16377			0.41882	0.26254	0.69712	0.55914					0.31761		0.43044
		0.24994			0.52539	0.33516	0.36473	0.42267					0.33583		0.35626
		0.30063			0.36986	0.29094	0.57983	0.43263					0.45485		0.36749
		0.22037			0.34261	0.33331	0.44911	0.43263					0.42493		0.35235
		0.24726			0.3809	0.32147	0.43372	0.53542					0.50104		0.30034
		0.17788			0.86041	0.31464	0.60782	0.53542					0.3741		0.28098
		0.29742			0.52185	0.53085	0.72935	0.3947					0.3954		0.24528
		0.26664			0.53185	0.57745	0.3742	0.54931					0.37161		0.54304
		0.38269			0.45228	0.63884	0.35812	0.54931					0.34043		0.54304
		0.42577			0.49917	0.61961	0.72029	0.49599					0.2953		0.44376
		0.32943			0.45848	0.47121	0.6958	0.59488					0.27834		0.59021
		0.22889			0.53009	0.31725	0.56099	0.47436					0.34393		0.71392
		0.29636			0.6912	0.39172	0.32907	0.29337					0.27491		0.30708
		0.24983			0.36946	0.49788	0.78786	0.29348					0.3094		0.27612
		0.23474			0.32036	0.28375	0.83862	0.40559					0.40003		0.25945
		0.2174			0.45586	0.26825	0.62836	0.38542					0.2433		0.25931
		0.27067			0.63077	0.21217	0.39856	0.4255					0.30502		0.22677
		0.19178			0.45175	0.36266	0.31721	0.66711					0.29896		0.19214
		0.28236			0.60043	0.41269	0.77851	0.40813					0.45828		0.21292
		0.50663			0.33396	0.33311	0.77132	0.57213					0.22546		0.37971
		0.50053			0.39826	0.35612	0.35583	0.59256					0.30223		0.33368
		0.25917			0.18309	0.31263	0.43717	0.66286					0.24332		0.51641
		0.29958			0.47627	0.26618	0.86026	0.43289					0.30149		0.20856
		0.38897			0.41296	0.28966	0.81409	0.38526					0.34414		0.91309
		0.34287			0.40758	0.54882	0.62846	0.57621					0.27178		0.89474
		0.44363			0.33342	0.55901	0.34851	0.75573					0.45661		0.24935
		0.42066			0.42829	0.34576	0.71586	0.43654					0.28175		0.28475
		0.393			0.27154	0.33925	0.66543	0.45731					0.22441		0.49016
		0.41008			0.47415	0.80876	0.83144	0.4381					0.29841		0.22578
		0.26566			0.45189	0.3478	0.36557	0.38436					0.22082		0.24044
		0.86418			0.3274	0.22805	0.51323	0.33627					0.27431		0.15357
		0.36499			0.38478	0.37787	0.64072	0.3099					0.23457		0.15875
		0.30054			0.53667	0.26468	0.56493	0.52497					0.34399		0.27183
		0.54498			0.40933	0.31961	0.35656	0.36194					0.44215		0.27981
		0.31382			0.30923	0.60502	0.338	0.29329					0.22243		0.18863
		0.35056			0.36879	0.44635	0.32393	0.42323					0.55048		0.18542
		0.28855			0.40417	0.47384	0.36076	0.51048					0.26864		0.1978
		0.27349			0.34773	0.92864	0.42977	0.42484					0.28602		0.19202
		0.17593			0.38263	0.75118	0.55308	0.51293					0.20413		0.44685
		0.61169			0.43715	0.38366	0.69753	0.3979					0.19001		0.17112
		0.58964			0.42018	0.37327	0.34955	0.33253					0.23111		0.76912
		0.47349			0.40204	0.31016	0.50963	0.42829					0.25361		0.929
		0.41682			0.40204	0.59466	0.58314	0.48794					0.32682		0.32836
		0.19593			0.9022	0.40508	0.60187	0.57017					0.42192		0.67152
		0.22926			0.7285	0.3541	1.007	0.3965					0.43995		0.31124
		0.50141			0.27812	0.41761	0.78109	0.46476					0.20249		0.16893
		0.18128			0.37347	0.37224	0.43546	0.4471					0.17987		0.1812
		0.46114			0.43369	0.57545	0.42983	0.35628					0.15887		0.25573
		0.6225			0.44045	0.33252	0.35942	0.51062					0.2453		0.19755
		0.19406			0.42728	0.4019	0.58811	1.0152					0.21281		0.17032
		0.23234			0.30281	0.49619	0.45653	0.47569					0.30615
		0.17602			0.26499	0.3177	0.42944	0.4252					0.15788		0.38497
		0.32544			0.38795	0.49478	0.37141	0.24631					0.17913		0.22994
		0.32544			0.62952	0.53722	1.0458	0.30202					0.34114		0.43956
		0.20513			0.59068	0.52992	0.34869	0.44558					0.26375		0.48223
		0.38921			0.40773	0.56386	1.1201	0.3526					0.51838		0.35127
		0.41905			0.40773	0.64545	0.69744	0.53972					0.45938		0.38509
		0.18387			0.43471	0.64545	0.46402	0.38284					0.21083		0.29284
		0.312			0.51109	0.56748	0.40447	0.43267					0.15602		0.2654
		0.24347			0.34235	0.82675	0.6221	0.56125					0.17892		0.38088
		0.37686			0.33525	0.73087	0.60291	0.56125					0.25812		0.34822
		0.20793			0.50072	0.80288	0.54416	0.44674					0.19042		0.395
		0.30212			0.39312	0.82911	0.50355	0.46588					0.28959		0.19223
		0.28303			0.53952	0.54953	0.89494	0.30684					0.29341		1.0121
		0.46358			0.5113	0.49041	0.61891	0.22261					0.24904		0.38211
		0.40181			0.52966	0.45621	0.57279	0.37424					0.58712		0.34738
		0.32921			0.47015	0.54131	0.63628	0.48338					0.33918		0.20773
		0.35562			0.73853	0.42555	0.84488	0.57087					0.22875		0.29055
		0.33924			0.30993	0.89715	0.44501	0.33068					0.29208		0.35808
		0.27892			0.34932	0.45715	1.0238	0.28383					0.18578		0.37688
		0.32643			0.38781	0.6664	0.90608	0.31888					0.17536		0.39665
		0.29			0.34938	0.56364	0.82093	0.4207					0.18865		0.35435
		0.33647			0.3967	0.56364	0.41648	0.47895					0.31602		0.43776
		0.2449			0.36716	0.56364	0.83414	0.46731					0.28739		0.49375
		0.38059			0.33513	0.56364	0.88602	0.59149					0.1873		0.28385
		0.37351			0.32521	0.40612	0.58876	0.29891					0.1775		0.2
		0.69739			0.61036	0.60473	0.49452	0.44368					0.35325		0.2
		0.68911			0.45406	0.45369	0.71278	0.2649					0.34401		0.29559
		0.25803			0.26942	0.58092	0.55855	0.38003					0.30333		0.19175
		0.3041			0.2211	0.40269	0.56712	0.3593					0.21741		0.21085
		0.53299			0.31683	0.36159	0.36928	0.42689					0.21318		0.32382
		0.52164			0.30564	0.49533	0.5092	0.81981					0.12075		0.32233
		0.1743			0.39763	0.5152	0.73593	0.27414					0.16122		0.19519
		0.18731			0.58851	0.63687	0.555	0.35292					0.18903		0.3991
		0.26674			0.38012	0.50197	0.76205	0.28185					0.46424		0.27372
		0.12219			0.35812	0.85374	0.48299	0.29812					0.41408		0.1405
		0.65452			0.40251	0.85374	0.42094	0.42768					0.47516		0.30139
		0.42763			0.49006	0.62555	0.60687	0.42768					1.4585		0.24897
		0.19291			0.53665	0.51928	0.53542	0.29567					1.0828		0.41547
		0.35227			0.44848	0.43044	0.42941	0.44929					1.1231		0.33357
		0.407			0.50558	0.65243	0.93623	0.3264					0.78721		0.2718
		0.407			0.61804	0.52694	0.56276	0.65606					0.38845		0.20485
		0.26704			0.44822	0.52694	0.89918	0.49468					0.43949		0.2063
		0.52808			0.54374	0.47773	0.46501	0.52466					0.79394		0.14916
		0.20077			0.36896	0.42392	0.88061	0.3304					0.84699		0.65966
		0.29244			0.25261	0.21571	0.79697	0.31363					0.84699		0.12977
		0.3203			0.31764	0.80584	0.47763	0.30582					0.70174		0.18311
		0.26823			0.30061	0.69493	0.40966	0.33648					0.7359		0.3589
		0.63501			0.25999	0.53271	0.35696	0.5955					1.1229		0.37105
		0.5439			0.83476	0.47711	0.2499	0.38216					0.89829		0.26506
		0.23709			0.27854	0.34166	0.39747	0.39133					0.72284		0.17373
		0.25272			0.38366	0.45735	0.50088	0.39133					0.45511		0.38484
		0.23682			0.31179	0.65528	0.39214	0.58376					0.36174		0.66032
		0.22258			0.39255	0.26038	0.34225	0.21685					0.39661		0.43305
		0.26106			0.38179	0.25582	0.34718	0.33139					0.49132		0.23641
		0.22874			0.48254	0.30042	0.97124	0.33109					0.66093		0.24853
					0.4389	0.435	0.73444	0.46579					0.58614		0.31792
					0.4389	0.37577	0.54208	0.32611					0.86598		0.26522
					0.53607	0.44516	0.82702	0.31619					0.48937		1.0786
					0.34647	0.2014	0.82702	0.65962					0.37054		0.15154
					0.43634	0.23433	0.80666	0.65316					0.44361		0.29491
					0.37666	0.29189	0.45076	0.30893					0.39139		0.35072
					0.41248	0.24383	0.50078	0.34745					1.0913		0.35072
					0.63605	0.29641	0.87961	0.5869					0.36811		0.49092
					0.3781	0.40053	0.87961	0.43153					1.1136		0.56944
					0.35536	0.40053	0.37552	0.5704					0.90249		0.5676
					0.38287	0.27663	0.3556	0.39822					0.21889		0.42328
					0.5275	0.19643	0.76119	0.38916					0.22264		0.33927
					0.86521	0.39315	0.67026	0.40952					0.35871		0.32847
					0.57025	0.39043	1.3507	0.29687					0.28131		0.27105
					0.3487	0.39791	0.52386	0.2686					0.47221		0.32632
					0.3487	0.40898	0.70592	0.45518					0.28596		0.31898
					0.30065	0.27277	0.56337	0.50746					0.39328		0.19459
					0.5537	0.76633	0.31278	0.39715					0.4053		0.19042
					0.56865	0.27442	0.44743	0.39776					0.59273		0.1803
					0.29476	0.21276	0.41226	0.34742					0.26599		0.69721
					0.41951	0.58148	0.58229	0.46435					1.2992		0.20988
					0.41597	0.57444	0.57338	0.3615					0.95212		0.39601
					0.37833	0.69031	0.74939	0.45722					0.82223		0.39601
					0.37833	0.31612	0.47892	0.29803					0.91351		0.39601
					0.60468	0.31164	1.1871	0.30581					0.99327		0.22323
					0.26399	0.25862	1.1871	0.33103					0.74426		0.19376
					0.19796	0.53985	0.43449	0.41017					0.74426		0.37433
					0.46543	0.47027	0.47436	0.9192					0.44424		0.50646
					0.19198	0.97992	0.35546	0.4328					0.56818		0.26581
					0.45455	0.38661	1.0855	0.39206					0.71626		0.16099
					0.2331	0.197	0.83638	0.30654					0.72726		0.21013
					0.54459	0.2557	0.29506	0.71166					0.40702		0.31358
					0.49921	0.23399	0.25176	0.47405					0.53122		0.32916
					0.20052	0.23242	0.32055	0.49381					0.65473		0.21103
					0.28027	0.62003	0.91544	0.81689					0.67342		0.5509
					0.27898	0.62003	0.48579	0.46947					0.40346		0.33207
					0.27898	0.39927	0.66889	0.39158					0.37998		0.23771
					0.19968	0.32175	0.30727	0.35054					0.42779		0.63588
					0.31272	0.32175	0.4282	0.43086					0.4749		0.56
					0.34337	0.26046	0.73877	0.4078					0.83793		0.45319
					0.26576	0.5748	0.25848	0.32176					0.2791		0.38994
					0.57944	0.35619	0.46707	0.3557					0.14553		0.23863
					0.52121	0.48483	0.26485	0.42057					0.28928		0.25305
					0.43974	0.57794	0.56133	0.46416					0.21922		0.2336
					0.55138	0.40479	0.41709	0.56915					0.28721		0.31738
					0.39929	0.47951	0.42206	0.56915					0.21902		0.17631
					0.35663	0.41583	0.34481	0.49847					0.23281		0.14846
					0.27754	0.33082	0.40535	1.12					1.0344		0.23305
					0.33125	0.33082	0.49631	0.36206					0.33739		0.12664
					0.53382	0.58353	0.4544	1.3049					0.55682		0.17228
					0.57272	0.92389	0.63919	0.54514					0.55682		0.18211
					0.55436	0.37078	0.678	0.53036					0.48627		0.16857
					0.32387	0.42448	0.80334	0.30577					0.43098		0.19225
					0.42723	0.44112	0.35515	0.42581					0.47098		0.15241
					0.37942	0.38228	0.2842	0.30983					0.34529		0.34654
					0.51349	0.40487	0.25313	0.58414					0.54952		0.23048
					0.26591	0.38186	0.30957	0.52748					0.29582		0.18883
					0.28896	0.34356	0.41326	0.57218					0.39217		0.17068
					0.38983	0.35271	0.3072	0.46066					0.33223		0.17071
					0.41725	0.35009	0.21987	0.51081					0.28775		0.33308
					0.43475	0.32639	0.49338	0.491					0.35708		0.37432
					0.41748	0.5244	0.2971	0.35543					0.321		0.83976
					0.29412	0.324	0.46482	0.56094					0.35033		0.42064
					0.43892	0.58079	0.31344	0.38523					0.38743		0.16691
					0.3326	0.58079	0.31027	0.42093					0.482		0.33316
					0.41927	0.30137	0.61588	0.71268					0.56218		0.20968
					0.57615	0.61228	0.28028	0.33102					0.61099		0.20968
					0.38014	0.5395	1.2076	0.32164					0.35916		0.42527
					0.40411	0.70914	1.0758	0.50918					0.33373		0.4237
					0.27069	0.70914	1.1478	0.52617					0.43085		0.46403
					0.31239	0.5833	0.3398	0.94715					0.17777		0.37453
					0.70237	1.0498	0.18027	0.81233					1.008		0.53038
					0.46091	0.30693	0.74198	0.74191					0.68634		0.318
					0.49509	0.65711	0.80266	0.74327					0.30498		0.2929
					0.49509	0.65711	0.36698	0.35325					0.45105		0.24549
					0.38389	0.44537	0.21769	0.3024					0.35179		0.43247
					0.4516	0.47288	0.24031	0.36379					0.47889		0.58542
					0.31978	0.9984	0.218	0.49061					1.0641		0.35076
					0.77533	1.0964	0.24411	0.41771					0.87698		0.35626
					0.65558	0.56562	0.472	0.48051					0.60524		0.33194
					0.34862	0.44311	0.2197	0.34869					0.50139		0.5918
					0.30013	1.1144	0.24957	0.65906					0.44122		0.38439
					0.23948	0.72472	0.32202	0.44595					0.35362		1.0102
					0.54444	0.46692	0.32301	0.37537					0.43002		0.78093
					0.30486	0.33053	0.36356	0.32298					0.51038		0.46512
					0.37911	0.3531	0.35806	0.33925					0.61783		0.43898
					0.30534	0.27462	0.33149	0.47					0.62043		0.28078
					0.51707	0.44771	0.31547	0.75797					0.87374		0.176
					0.45131	0.31789	0.38997	0.34846					0.33556		0.19719
					0.30765	0.4348	0.35231	0.38259					0.43529		0.90876
					0.31254	0.76875	0.42006	0.35842					0.26924		0.36413
					0.30406	0.68977	0.27229	0.39518					0.3608		0.48385
					0.25426	0.48437	0.21251	0.31534					0.49008		0.25793
					0.33491	0.3711	0.26399	0.27193					0.36279		0.42612
					0.30807	0.42342	0.32308	0.35621					0.37167		0.47946
					0.28903	0.71671	0.5008	0.70236					0.33297		0.47946
					0.38885	0.32079	0.21634	0.35582					0.36964		0.30372
					0.27689	0.54833	0.23867	0.49759					0.30408		0.26238
					0.36983	0.54833	0.19098	0.41907					0.35068		0.2734
					0.33966	0.46315	0.32816	0.31026					0.39561		0.238
					0.23028	0.55727	0.61421	0.72165					0.49057		0.31011
					0.23522	1.0061	0.24697	0.51929					0.30253		0.18725
					0.20129	0.35999	0.27908	0.34376					0.32347		0.3167
					0.52677	0.54266	0.28478	0.4111					0.25612		0.15553
					0.27241	0.4595	0.40162	0.33408					0.16728		0.18828
					0.21884	0.29931	0.33105	0.4286					0.44866		0.24378
					0.25873	0.25167	0.46201	0.37722					0.35		0.17087
					0.21519	0.35679	0.40743	0.3785					0.39671		0.3846
					0.21797	0.41194	0.37522	0.43213					0.2263		0.21688
					0.27847	0.38326	0.41267	0.47833					0.55268		0.12429
					0.27435	0.44593	0.63494	0.37093					0.48117		0.16175
					0.51592	0.43062	0.68044	0.53347					0.28409		0.18286
					0.25318	0.20827	0.19955	0.55269					0.19603		0.21056
					0.33816	0.31075	0.45301	0.4872					0.41108		0.30833
					0.2723	0.22336	0.37655	0.46897					0.2158		0.22238
					0.20914	0.23539	0.28657	1.1589					0.23916		0.21847
					0.63041	0.26358	0.27717	0.74613					0.25019		0.14381
					0.30048	0.513	0.41633	0.37976					0.73493		0.13439
					0.41136	0.55189	0.29057	0.45068					0.27428		0.23769
					0.35547	0.28441	0.32302	0.5036					0.35983		0.21491
					0.64592	0.30197	0.21726	0.52251					0.12232		0.37498
					0.34465	0.32722	0.28296	0.47764					0.36142		0.30294
					0.66579	0.34833	0.24383	0.37551					0.3498		0.51475
					0.35415	0.60057	0.52019	0.3714					0.26954		0.32066
					0.40392	0.48883	0.38755	0.30432					0.61099		0.35354
					0.42374	0.31336	0.38965	0.35548					0.33277		0.7219
					0.43778	0.75915	0.32768	0.33031					0.44463		0.22249
					0.42196	0.37224	0.26554	0.84217					0.85028		0.16214
					0.72742	0.20731	0.28375	0.32197					0.43675		0.37462
					0.61842	0.23912	0.22551	0.41862					0.32801		0.40409
					0.65783	0.40542	0.27835	0.45343					0.64625		0.74965
					0.486	0.30935	0.68549	0.67068					0.55511		0.37943
					0.41097	0.30464	0.94457	0.65915					0.55918		0.39548
					0.43618	0.70876	0.53312	0.34935					0.63545		0.4503
					0.31873	0.40737	1.5654	0.33984					0.49295		0.62489
					0.69847	0.30174	1.0817	0.53741					0.51532		0.21123
					0.25593	0.29876	0.50973	0.32676					0.39708		0.34303
					0.27783	0.449	0.61573	0.63775					0.36943		0.26314
					0.46761	0.43298	0.45153	0.44894					0.79977		0.25901
					0.71569	0.44168	0.39975	0.3113					0.46819		0.25523
					0.56633	0.394	0.47843	0.29976					0.49931		0.24105
					0.48017	0.34508	0.22424	0.45355					0.62185		0.44159
					0.43422	0.31229	0.22852	0.45355					0.45345		0.24082
					0.36163	0.45234	0.5474	0.32002					0.47702		0.26251
					0.38963	0.42599	0.32204	0.56272					0.71469		0.27668
					0.35962	0.4488	0.32204	0.27933					0.56241		0.15238
					0.53986	0.48669	0.38711	0.27792					1.0085		0.15686
					0.88576	0.58857	0.37485	0.56386					0.7531		0.17313
					0.50563	0.41318	0.27547	0.57553					0.51624		0.20572
					0.50563	0.53685	0.26873	0.57553					0.81108		0.2014
					0.42356	0.20565	0.15465	0.98306					0.49953		0.29321
					0.43435	0.33181	0.9171	0.74024					0.60843		0.28378
					0.46793	0.23741	0.7042	0.74024					0.522		0.31041
					0.38194	0.35584	0.29736	0.3173					0.6899		0.33299
					0.36866	0.43025	0.52021	0.95428					0.89896		0.49577
					0.44161	0.45622	0.32466	0.79649					0.42581		0.22081
					0.31054	0.39213	0.90457	0.66237					0.34096		0.29952
					0.38462	0.51621	0.97693	0.64265					0.48937		0.22774
					0.16825	0.51621	0.66447	1.3595					0.51751		0.15171
					0.22428	0.58957	0.39846	0.79718					0.5376		0.21272
					0.41663	0.34293	0.35983	0.38553					0.49421		0.44336
					0.59821	0.34611	0.5916	0.37159					0.49284		0.26531
					0.27132	0.41649	0.83283	0.38096					0.34626		0.50825
					0.26982	0.32059	0.3699	0.30382					0.26907		0.24183
					0.95606	0.36717	0.48554	0.35987					0.32395		0.24035
					0.27458	0.36003	0.46452	0.34232					0.54366		0.48183
					0.52438	0.46528	0.46452	0.29349					0.31901		0.19601
					0.50669	0.44046	0.40598	0.31268					0.38178		0.17448
					0.36371	0.40895	0.18383	0.51142					0.3753		0.13153
					0.69853	0.70055	0.46248	0.46181					0.54643		0.42311
					0.44591	0.41183	0.47634	0.5804					0.44041		0.18641
					0.48848	0.54934	0.39138	0.36305					0.6195		0.47824
					0.56697	0.3278	0.39138	0.5506					0.6096		0.28572
					0.47278	0.36325	0.31245	0.45747					0.40251		0.70847
					0.31262	0.29351	0.3224	0.45834					0.36804		0.26641
					0.58979	0.40759	0.56695	0.45834					0.36211		0.45701
					0.37976	0.27592	0.62027	0.44199					0.33607		0.68726
					0.68907	0.72529	0.40049	0.59112					0.31808		0.68726
					0.3807	0.49291	0.26899	0.59738					0.51866		0.4623
					0.62642	0.49291	0.50396	0.38666					0.52865		0.72351
					0.72079	0.36086	0.34124	0.38666					0.70698		0.44085
					0.65049	0.48098	0.50117	0.38512					0.45492		0.56859
					0.4473	0.45327	0.23346	0.36075					0.3697		0.56307
					0.34292	0.68179	0.33438	0.89404					0.44162		0.57067
					0.42538	0.5475	0.42049	0.58069					0.26844		0.68403
					0.48776	0.54334	0.46258	0.54285					0.28759		0.48124
					0.43908	0.55052	0.69469	0.54285					0.28454		0.4416
					0.52483	0.51127	0.62017	0.50141					0.38143		0.50417
					0.34019	0.34516	1.2653	0.43527					0.22833		0.56476
					0.80365	0.28643	0.3344	0.43527					0.34421		1.04
					0.74743	0.3502	0.4949	0.61347					0.30478		0.34018
					0.25227	0.33061	0.37864	0.51581					0.40951		0.56451
					0.69915	0.42281	0.33496	0.43074					0.56794		0.56451
					0.43099	0.31714	0.29916	0.45796					0.23724		0.38158
					0.45434	0.41211	0.66839	0.39231					0.30523		0.53817
					0.56332	0.39906	0.71542	0.3165					0.30472		0.43958
					0.82014	0.44184	0.81713	0.25511					0.32648		0.43434
					0.51602	0.50822	0.30164	0.46275					0.33121		0.4697
					0.35256	0.45525	1.2865	0.4783					0.56373		0.34104
					0.32624	0.34504	0.93696	0.37423					0.56373		0.60331
					0.71317	0.48321	0.37335	0.39037					0.27847		0.38058
					0.62407	0.75063	0.43629	0.31557					0.35134		0.61822
					0.34792	0.63454	0.79923	0.53594					0.42366		0.31421
					0.2966	0.64527	0.38811	0.42202					0.42844		0.60398
					0.37765	0.36807	0.90484	0.27196					0.37191		0.60398
					0.49515	0.63552	0.88903	0.46011					0.357		0.50958
					0.67802	0.57238	0.49949	0.51602					0.49648		0.52701
					0.43094	0.45164	0.35966	0.40193					0.46549		0.48465
					0.3217	0.50893	0.3748	0.34844					0.40613		0.63128
					0.29791	0.36469	0.3123	0.31366					0.41871		0.45009
					0.44129	0.35162	0.36829	0.36618					0.22957		0.56414
					0.69773	0.18183	0.28572	0.45238					0.39085		0.35734
					0.39078	0.3595	0.59779	0.48997					0.26435		0.48177
					0.41076	0.3195	0.4927	0.70048					0.25338		0.35785
					0.48099	1.1113	0.42042	0.70048					0.24249		0.54779
					0.49546	0.98291	0.32723	0.59865					0.37079		0.41268
					0.41387	0.31375	0.37036	0.36663					0.25533		0.41268
					0.4271	0.45275	0.39513	0.53698					0.43922		0.40405
					0.4271	0.46322	0.81583	0.39773					0.32725		0.28953
					0.50364	0.86881	0.54748	0.39901					0.2483		0.57517
					0.42194	0.86881	0.85845	0.28201					0.22263		0.50973
					0.37944	0.46918	0.85845	0.37749					0.40672		0.3828
					0.48977	0.35447	0.57136	0.42833					0.38828		0.33202
					0.40002	0.41596	0.36365	0.38607					0.36881		0.56678
					0.23332	0.25446	0.48094	0.40614					0.54314		0.58705
					0.77098	0.3937	0.5602	0.32008					0.46325		0.44726
					0.48797	0.40102	0.59658	0.32322					0.42292		0.44219
					0.4281	0.4086	0.70302	0.32322					0.28159		0.51123
					0.43407	0.44834	1.3506	0.45419					0.32979		0.43782
					0.48329	0.61998	0.59201	0.53103					0.57531		0.56579
					0.47062	0.72964	0.57513	0.47205					0.32732		0.49216
					0.3156	0.52979	0.38079	0.57868					0.22763		0.49832
					0.38749	0.5508	0.61444	0.49303					0.44235		0.48408
					0.43994	0.51007	0.40078	0.38217					0.32712		0.49308
					0.68256	0.52088	0.51026	0.31515					0.39815		0.34458
					0.64292	0.50773	1.0917	0.2841					0.56591		0.69336
					0.38364	0.50472	0.74644	0.18107					0.324		0.84174
					0.45131	0.81547	0.29728	0.16226					0.40319		0.69363
					0.50489	0.53031	1.5708	0.36672					0.24368		0.34129
					0.42654	0.5776	1.5097	0.47486					0.3657		0.35661
					0.47079	0.37425	0.80941	0.21793					0.27333		0.44002
					0.20508	0.99223	0.75423	0.21946					0.33536		0.43015
					0.60479	0.55619	0.713	0.31695					0.32067		0.37909
					0.59168	0.70259	1.3502	0.28272					0.54467		0.52442
					0.56134	0.45464	0.58183	0.28922					0.54467		0.35997
					0.70382	0.6688	0.92072	0.25928					0.35497		0.46542
					0.66507	0.6688	0.57371	0.29629					0.43897		0.46885
					0.2558	0.36936	1.3802	0.30483					0.33707		0.5486
					0.37174	0.44273	0.57127	0.25727					0.48625		0.62652
					0.31764	0.35429	0.54874	0.23939					0.35775		0.37726
					0.43267	0.32023	0.49464	0.4252					0.32038		0.50609
					0.65589	0.37468	0.8255	0.40968					0.40957		0.29318
					0.65589	0.40581	0.71886	0.25245					0.30481		0.48758
					0.82976	0.41904	1.1032	0.30636					0.35124		0.49734
					0.66722	0.4332	0.99486	0.30636					0.38533		0.5815
					0.35851	0.41033	0.54709	0.31445					0.3889		0.3548
					0.38709	0.46496	0.48967	0.28362					0.40268		0.27763
					0.3959	0.27074	0.49733	0.3719					0.27046		0.417
					0.49377	0.38422	0.60264	0.28236					0.37884		0.70929
					0.34607	0.38968	0.29731	0.31878					0.2649		0.51074
					0.37861	0.30614	1.5688	0.20191					0.25841		0.44515
					0.34494	0.38836	1.5688	0.46854					0.2549		0.34468
					0.41063	0.29998	0.4568	0.3541					0.38271		0.46141
					0.51299	0.30022	0.40312	0.37706					0.46939		0.29731
					0.6433	0.28989	0.35254	0.31476					0.47545		0.449
					0.57698	0.28989	0.64397	0.24766					0.51127		0.43388
					0.74641	0.22107	0.34551	0.22361					0.42999		0.47024
					0.52876	0.35219	0.49314	0.49739					0.26888		0.39315
					0.4779	0.28769	1.1399	0.49739					0.2971		0.45886
					0.35134	0.19828	1.1399	0.23635					0.2983		0.59468
					0.70513	0.2204	0.48682	0.34664					0.25296		0.50354
					0.45521	0.18041	0.39366	0.41825					0.29102		0.42333
					0.42933	0.61993	0.68492	0.28621					0.37311		0.53342
					0.32117	0.21805	0.43479	0.29884					0.39079		0.46908
					0.34557	0.68386	0.72623	0.62066					0.44896		0.46908
					0.35441	0.45822	1.3233	0.29385					0.31106		0.55116
					0.47268	0.67217	1.0538	0.28952					0.36895		0.63817
					0.37302	0.58889	0.92997	0.3602					0.33781		0.50145
					0.49059	0.44184	0.74746	0.34949					0.4457		0.62352
					0.38135	0.35047	0.67815	0.38496					0.17921		0.64069
					0.38612	0.43275	0.6295	0.4743					0.25299		0.4676
					0.31467	0.3776	0.31069	0.30449					0.40232		0.30215
					0.4558	0.3776	0.29592	0.21529					0.17219		0.40582
					0.54613	0.33913	1.0072	0.54969					0.42773		0.40495
					0.62328	0.46599	0.81702	0.5415					0.42773		0.60847
					0.34529	0.32003	0.58922	0.41529					0.4542		0.51258
					0.38072	0.27715	0.61502	0.37193					0.39633		0.31348
					0.37986	0.30026	0.57971	0.48632					0.53101		0.41252
					0.43521	0.32255	0.36725	0.39823					0.39084		0.31868
					0.77636	0.32255	0.28938	0.39823					0.64415		0.37511
					0.47033	0.25379	0.72197	0.40146					0.52083		0.39634
					0.49367	0.27914	0.31028	0.29118					0.66083		0.35632
					0.54388	0.37181	0.18777	0.2597					0.38274		0.45018
					0.41651	0.31042	0.54884	0.77097					0.40459		0.4225
					0.41702	0.40038	0.24557	0.24497					0.297		0.42046
					0.4115	0.28611	0.31312	0.4863					0.45568		0.53541
					0.33242	0.25648	0.28459	0.47786					0.70713		0.47045
					0.34747	0.29388	0.44418	0.62135					0.35666		0.70579
					0.36895	0.35508	0.43574	0.60857					0.39814		0.47122
					0.38563	0.35508	0.48469	0.45191					0.4725		0.7176
					0.28323	0.18891	0.65723	0.23797					0.24939		0.42156
					0.44524	0.49195	0.59697	0.36047					0.33594		0.50442
					0.92165	0.25421	0.10521	0.36937					0.25382		0.4016
					0.96691	0.28153	0.14285	0.34462					0.77303		0.4016
					0.22718	0.30828	0.56167	0.50515					0.56829		0.46401
					0.35331	0.33515	0.29506	0.3979					0.50759		0.41146
					1.0924	0.55236	0.2219	0.27951					0.59389		0.39872
					1.1481	0.39625	0.15915	0.6463					0.44205		0.40893
					0.36056	0.48382	0.18907	0.31596					0.79392		0.51589
					0.40367	0.54903	0.24809	0.3411					0.42689		0.40585
					0.44415	0.25277	0.29168	0.39738					0.4235		0.34706
					0.44436	0.56697	0.12436	0.4036					0.4235		0.37606
					0.64517	0.44874	0.31313	0.40543					0.40363		0.44939
					0.55536	0.45058	0.28989	0.35945					0.45897		0.42914
					0.39575	0.51327	0.1721	0.31537					0.51226		0.29873
					0.34173	0.52257	0.17984	0.8253					0.71813		0.66268
					0.34013	0.14575	0.57258	0.77468					0.63147		0.47714
					0.40062	0.30406	1.256	0.46544					0.38742		0.42216
					0.59725	0.33871	0.40153	0.31047					0.58022		0.34945
					0.34677	0.35015	0.78878	0.72962					0.3649		0.53641
					0.54051	0.35015	0.47693	0.40043					0.58307		0.35757
					0.68022	0.35358	0.5455	0.35406					0.57826		0.54485
					0.16733	0.46098	0.44973	0.39751					0.63202		0.80388
					0.20583	0.43345	0.41941	0.87142					0.29646		0.59662
					0.44873	0.31961	0.28517	0.54282					0.25595		0.5116
					0.54373	0.56437	0.92899	0.44611					0.32536		0.61934
					0.84675	0.4478	0.35299	0.39201					0.51363		0.43552
					0.72818	0.35388	0.48523	0.44037					0.3836		0.53419
					0.36157	0.54035	0.2402	0.40804					0.29952		0.53419
					0.19005	0.54035	0.31877	0.32986					0.31852		0.41692
					0.5019	0.46182	0.25893	0.38983					0.34656		0.71573
					0.41263	0.27026	0.57561	0.45254					0.33744		0.54757
					0.40756	0.20761	0.43495	0.51302					0.44909		0.47792
					0.40756	0.3722	0.22019	0.31146					0.4065		0.49298
					0.4043	0.42925	0.61208	0.3778					0.40695		0.63197
					0.52078	0.47492	0.62611	0.30466					0.34531		0.83915
					0.48409	0.34178	0.21953	0.4215					0.36052		0.51281
					0.52341	0.36629	0.42924	0.36581					0.63441		0.49927
					0.42709	0.35062	0.36	0.41806					0.34744		0.25017
					0.45981	0.49944	0.35533	0.55437					0.49097		0.76764
					0.2362	0.42001	0.40986	0.41955					0.45749		0.67379
					0.33797	0.43845	0.23276	0.59205					0.29295		0.61101
					0.32981	0.25883	0.56765	0.99001					0.37494		1.0393
					0.37753	0.49077	0.24866	0.36161					0.3113		0.31614
					0.42111	0.55951	0.40218	0.48265					0.34735		0.47597
					0.58748	0.54244	0.22756	0.38795					0.35159		0.42094
					0.58748	0.40834	0.25057	0.89514					0.2965		0.65417
					0.63595	0.22148	0.65866	0.47357					0.28613		1.4086
					0.72449	0.64497	0.15774	0.45645					0.34409		0.6119
					0.33348	0.58067	0.50326	0.60675					0.54715		0.58939
					0.29251	0.47685	0.42328	0.76246					0.51371		0.42171
					0.34541	0.50551	0.25946	0.45393					0.22679		0.55279
					0.34337	0.50551	0.45585	0.72013					0.30973		1.1377
					0.43608	0.4153	0.66184	0.37103					0.33424		1.0838
					0.30983	0.39697	0.81026	0.57904					0.41283		0.89698
					0.34461	0.54664	1.2925	0.81037					0.43144		0.44804
					0.26655	0.35789	0.4089	0.59309					0.26568		0.45205
					0.31005	0.59103	0.25673	0.44073					0.33292		0.47418
					0.22726	0.59314	0.28193	0.39448					0.33667		0.37438
					0.21468	0.38152	0.16995	0.67047					0.47358		0.48701
					0.29152	0.77805	0.63759	0.66655					0.64429		0.43465
					0.37389	0.46145	0.62337	0.75674					0.41407		1.1592
					0.64439	0.41072	0.81316	0.70852					0.53063		0.5037
					0.49111	0.41207	0.50583	0.73742					0.44175		0.25442
					0.46435	0.28107	0.53802	0.56686					0.52464		0.25298
					0.30436	0.3567	0.42672	0.5016					0.49567		0.34033
					0.59458	0.31946	0.70952	0.5016					0.50515		0.58296
					0.37209	0.35228	0.81764	0.45193					0.25839		0.58296
					0.39317	0.47626	0.39923	0.36999					0.88669		0.25261
					0.23079	0.74681	0.54735	0.42301					0.83635		0.15644
					0.31163	0.31572	0.32511	0.46699					0.50817		0.31096
					0.31163	0.31129	0.64714	0.40432					0.37328		0.26229
					0.3573	0.56342	0.32663	0.63195					0.41994		0.45393
					0.51343	0.40091	0.50285	0.64559					0.69705		0.33285
					0.41884	0.44016	0.53958	0.84538					0.37868		0.27334
					0.38142	0.49971	0.49585	0.43965					0.44008		0.28017
					0.50085	0.36118	0.48997	0.486					0.31384		0.74946
					0.46972	0.38911	0.3905	0.3719					0.71995		0.71906
					0.46972	0.70346	0.29316	0.55662					0.37532		0.44675
					0.44451	0.66602	0.39228	0.55195					0.41219		0.31247
					0.66858	0.61632	0.46366	0.55195					0.42859		0.27814
					0.33365	0.34672	0.48452	0.39814					0.3915		0.55145
					0.31545	0.34367	0.42018	0.32577					0.42822		0.54037
					0.31586	0.40889	0.36618	0.34058					0.45786		0.55722
					0.41165	0.2485	0.44884	0.34997					0.47816		0.38647
					0.3708	0.33958	0.46144	0.59368					0.52263		0.23464
					0.71945	0.29242	0.46144	0.65093					0.49215		0.43764
					0.31115	0.15712	0.40644	0.49721					0.63523		0.27353
					0.31592	0.43577	0.21379	0.42389					0.359		0.51048
					0.30738	0.38962	0.3748	0.43158					0.37589		0.62657
					0.24429	0.32948	0.33924	0.4998					0.45489		0.9771
					0.33817	0.2481	0.46915	0.37299					0.53432		0.83642
					0.33817	0.55832	0.32943	0.40612					0.61191		0.84969
					0.25361	0.55522	0.1981	0.74821					0.59971		0.76158
					0.44105	0.49333	0.47008	0.37854					0.59916		0.89423
					0.21367	0.20855	0.24984	0.3849					0.55052		0.57149
					0.34428	0.38633	0.29023	0.33819					0.47294		0.45143
					0.31812	0.24605	0.35414	0.33738					0.50716		0.42736
					0.469	0.58526	0.44605	0.49145					0.60403		0.47572
					0.54319	0.63315	0.40151	0.34281					0.59011		0.67158
					0.3999	0.30529	0.34826	0.4334					0.45455		0.38276
					0.4779	0.30529	0.4929	0.37721					0.45081		0.31709
					0.46264	0.21384	0.48416	0.33355					0.40918		0.28962
					0.24669	0.47909	0.60032	0.41289					0.46471		0.50688
					0.31665	0.4308	0.51251	0.25641					0.4552		0.36765
					0.32267	0.16993	0.41751	0.46187					0.61587		0.21387
					0.30982	0.19718	0.53745	0.72672					0.48843		0.30981
					0.25956	0.57186	0.39687	0.40884					0.58994		0.30576
					0.37046	0.54641	0.41665	0.75514					0.50155		0.49595
					0.28105	0.26194	0.37113	0.85579					0.39874		0.26284
					0.50365	0.46667	0.39156	0.75976					0.52988		0.30686
					0.55953	0.30924	0.46459	0.41963					0.43495		0.2956
					0.44372	0.40015	0.29433	0.52341					0.42203		0.2998
					0.2993	0.4147	0.30573	0.49151					0.33643		0.3601
					0.50647	0.31704	0.38002	0.37					0.34909		0.29055
					0.45834	0.25683	0.52934	0.33189					0.33675		0.48143
					0.27457	0.54889	0.5537	0.69722					0.53237		0.42752
					0.43543	0.41691	0.40269	0.76182					0.45528		0.73331
					0.4977	0.20015	0.63334	0.58977					0.34428		0.31188
					0.43728	0.3252	0.3925	0.35136					0.55502		0.32458
					0.17218	0.26135	0.39243	0.46916					0.63288		0.29844
					0.31798	0.35351	0.47661	0.57331					0.41764		0.31127
					0.32568	0.34391	0.62563	0.25208					0.5665		0.17556
					0.35686	0.38299	0.36524	0.24441					0.32221		0.66853
					0.28302	0.35271	0.51029	0.43609					0.39066		0.65742
					0.28388	0.40996	0.37681	0.58529					0.38287		0.32392
					0.31402	0.3689	0.31735	1.09					0.33636		0.3614
					0.28682	0.26128	0.58548	1.0119					0.61489		0.73304
					0.33483	0.48383	0.31649	0.3293					0.64948		0.37401
					0.31578	0.79438	0.2609	0.52044					0.5842		0.2983
					0.20805	0.51839	0.35245	0.32812					0.37518		0.55834
					0.56501	0.24071	0.41511	0.40843					0.47251		0.34809
					0.56501	0.27433	0.33759	0.47306					0.47888		0.1619
					0.34255	0.48732	0.32777	0.47306					0.50245		0.65087
					0.36278	0.50491	0.33034	0.49254					0.44729		0.17687
					0.27704	0.32864	0.51984	0.49254					0.44335
					0.26124	0.64494	0.56262	0.81202					0.48215		0.27252
					0.59546	0.56659	0.27573	0.36631					0.53283		0.3824
					0.26917	0.56845	0.5333	0.41678					0.39915		0.39951
					0.74715	0.43329	0.67835	0.4495					0.39145		0.51218
					0.31851	0.379	0.42602	0.28216					0.48455		0.45688
					0.33649	0.24302	0.54308	0.38763					0.63364		0.70417
					0.34149	0.16919	0.54379	0.51063					0.50373		0.4279
					0.28801	0.41955	0.36861	0.52058					0.44658		0.41219
					0.34544	0.33165	0.37483	0.55635					0.35591		0.2943
					0.30864	0.48587	0.34173	0.3121					0.4069		0.37042
					0.32915	0.24951	0.63477	0.32451					0.41142		0.54819
					0.27519	0.53608	0.59369	0.37071							0.32114
					0.22517	0.51142	0.98063	0.34069							0.33464
					0.43344	0.65284	0.57236	0.28508							0.3675
					0.35342	0.57281	0.44883	0.39267							0.23979
					0.42008	0.34232	0.4264	0.44582							0.40871
					0.51322	0.42158	0.47804	0.46722							0.43204
					0.36923	0.29684	0.48136	0.31885							0.95854
					0.4667	0.39649	0.63875	0.31554							0.92814
					0.52082	0.39951	0.57459	0.34147							0.45521
					0.23035	0.48453	0.56906	0.30931							0.35772
					0.50735	0.45729	0.3145	0.29193							0.53471
					0.3312	0.7358	0.69868	0.65833							0.33958
					0.30242	0.68707	0.3083	0.36861							0.43141
					0.26442	0.56222	0.45265	0.46046							0.32453
					0.35298	0.42897	0.26849	0.55747							0.51008
					0.34946	0.40573	0.33785	0.58966							0.3035
					0.36224	0.46109	0.54154	0.4965							0.36462
					0.58159	1.2015	0.36825	0.31761							0.39312
					0.4932	0.42989	0.70665	0.31151							0.33723
					0.4932	0.71651	0.30284	0.3313							0.74117
					0.53193	0.51071	0.68268	0.31168							0.50044
					0.30869	0.39225	0.81346	0.54088							0.4202
					0.37705	0.74407	0.30283	0.23468							0.35879
					0.42642	0.70776	0.4519	0.53268							0.18617
					0.42642	0.70776	0.38112	0.54627							0.27756
					0.61976	0.47507	0.36082	0.61113							0.3512
					0.46554	0.22461	0.6616	0.47235							0.69841
					0.30576	0.85761	0.71124	0.47405							0.37313
					0.46151	0.37087	0.47083	0.50538							0.36622
					0.58986	0.88823	0.48444	0.56182							0.34211
					0.5876	1.5201	0.62122	0.4816							0.26061
					0.40055	0.41472	0.59688	0.44414							0.77421
					0.36101	0.68514	0.47859	0.49391							0.49818
					0.29695	0.36788	0.54254	0.51063							0.4615
					0.25346	0.32353	0.49025	0.25616							0.46237
					0.25749	0.38198	0.49752	0.23239							0.21461
					0.25173	0.38198	0.54595	0.26918							0.30617
					0.20779	0.42196	0.44047	0.57888							0.31319
					0.3573	0.58692	0.31449	0.24749							0.28759
					0.3573	0.4719	0.38331	0.36726							0.36316
					0.24436	0.45427	0.47211	0.42421							0.43361
					0.58773	0.64395	0.44623	0.37562							0.43522
					0.4798	0.31728	0.41225	0.25866							0.34327
					0.24395	0.76373	0.36621	0.41782							0.95007
					0.19933	0.54439	0.29345	0.32904							0.14287
					0.22819	0.91842	0.63693	0.48527							0.32289
					0.21469	0.981	0.33463	0.42493							0.32114
					0.34047	1.1301	0.34246	0.29747							0.16709
					0.2604	0.88126	0.41833	0.69257							0.33256
					0.26767	0.34592	0.56839	0.45351							0.35413
					0.27675	0.94435	0.45024	0.29536							0.1701
					0.20412	0.58771	0.39017	0.348							0.65521
					0.29854	0.42049	0.31933	0.28912							0.17241
					0.29159	0.70171	0.40453	0.4522							0.25551
					0.25234	0.98252	0.69397	0.49383							0.31023
					0.28145	0.80671	0.34959	0.30248							0.21989
					0.38322	0.65083	0.34774	0.26306							1.0781
					0.3013	0.24015	0.39016	0.22698							0.90148
					0.15757	0.27546	0.38456	0.53205							0.72599
					0.17623	0.29461	0.39434	0.44378							0.4492
					0.15725	0.29759	0.33785	0.46244							0.24605
					0.19452	0.32476	0.35623	0.2818							0.22162
					0.15034	0.30972	0.37844	0.52652							0.16803
					0.13767	0.41586	0.25566	0.45622							0.53827
					0.16375	0.43931	0.39106	0.47638							0.78999
					0.19954	0.24235	0.4757	0.69925							0.18283
					0.33733	0.33854	0.56374	0.1973							0.33085
					0.19524	0.19387	0.3834	0.35161							0.34762
					0.232	0.22795	0.49322	0.31823							0.2497
					0.16901	0.20489	0.40549	0.24756							0.17924
					0.20593	0.36316	0.22618	0.34803							0.23455
					0.21564	0.5257	0.37046	0.32499							0.31649
					0.24407	0.5257	0.39185	0.23859							0.41803
					0.229	0.37601	0.38424	0.37359							0.41803
					0.229	0.31867	0.35424	0.21607							0.38611
					0.12362	0.25853	0.31389	0.28304							0.2676
					0.17446	0.39196	0.30303	0.41738							0.35791
					0.17262	0.24143	0.30303	0.3846							0.35155
					0.38265	0.23789	0.38098	0.35954							0.69534
					0.29648	0.21582	0.24597	0.48169							0.26328
					0.33577	0.49298	0.34483	0.27795							0.20762
					0.43904	0.45072	0.41728	0.42777							0.2954
					0.26418	0.21492	0.31067	0.645							0.27646
					0.69401	0.28076	0.78231	0.46262							0.31715
					0.6823	0.32668	0.55937	0.34303							0.27735
					0.6937	0.35151	0.60439	0.46867							0.23182
					0.47379	0.30957	0.76968	0.39715							0.19139
					0.3675	0.2523	0.58124	0.39715							0.32721
					0.27109	0.21229	0.33371	0.43298							0.14477
					0.46172	0.40143	0.37278	0.26413							0.24184
					0.33523	0.3126	0.35888	0.39884							0.48848
					0.37909	0.35221	0.38743	0.67923							0.39388
					0.27274	0.44066	0.27255	0.28209							0.18913
					0.2155	0.26744	0.23744	0.28936							0.21888
					0.30579	0.2091	0.31073	0.35405							0.16023
					0.20435	0.32811	0.27787	0.36807							0.14361
					0.27452	0.48841	0.60701	0.52179							0.28967
					0.40856	0.23029	0.48054	0.56584							0.20169
					0.29541	0.33356	0.38909	0.39527							0.32907
					0.33155	0.25283	0.36277	0.23055							0.29712
					0.21678	0.39552	0.36277	0.30508							0.22561
					0.53807	0.38423	0.27799	0.33667							0.34933
					0.50353	0.42395	0.27948	0.36205							0.21128
					0.40582	0.46153	0.59621	0.36205							0.20682
					0.30827	0.37332	0.62853	0.34077							0.23251
					0.29824	0.40104	0.28301	0.3367							0.26946
					0.28998	0.40899	0.48126	0.30182							0.26946
					0.458	0.34029	0.45497	0.42073							0.67883
					0.32122	0.34771	0.29796	0.45301							0.44582
					0.35994	0.77832	0.36326	0.62849							0.25601
					0.29585	0.29352	0.22911	0.38253							0.56179
					0.4092	0.37812	0.43825	0.35208							0.21716
					0.35481	0.34082	0.2851	0.2914							0.17467
					0.79484	0.34082	0.32736	0.48377							0.25958
					0.40642	0.31772	0.30513	0.47896							0.41806
					0.36118	0.4555	0.36225	0.58286							0.28088
					0.26639	0.43489	0.49007	0.72108							0.45206
					0.39255	0.33387	0.55847	0.72108							0.49112
					0.56992	0.4854	0.46242	0.39422							0.44164
					0.45916	0.32863	0.20194	0.16501							0.62488
					0.51437	0.31555	0.23386	0.51958							0.4477
					0.44834	0.3569	0.33174	0.4488							0.27072
					0.30341	0.61977	0.23461	0.40713							0.49921
					0.27092	0.56216	0.23871	0.35891							0.70658
					0.54678	0.38406	0.25947	0.23634							0.34348
					0.4139	0.37985	0.27343	0.3413							0.24892
					0.42563	0.35579	0.7081	0.31055							0.35411
					0.35338	0.43759	0.29599	0.21773							0.49149
					0.27799	1.0132	0.5503	0.86691							0.42267
					0.3345	0.78726	0.29308	0.1898							0.32573
					0.37045	1.1671	0.3311	0.32067							0.37486
					0.37045	0.58871	0.94041	0.35264							0.41956
					0.42428	0.70384	0.46703	0.34835							0.61063
					0.47622	0.39489	0.44398	0.345							0.29002
					0.44432	0.22744	0.25977	0.379							0.40186
					0.55016	0.33451	0.18437	0.22836							0.30452
					0.26252	0.24807	0.46052	0.61505							0.22085
					0.26252	0.24868	0.31344	0.5861							0.29628
					0.4237	0.48109	0.29776	0.36076							0.45996
					0.2332	0.31358	0.36631	0.30739							0.45996
					0.23951	0.46142	0.37576	0.4978							0.36568
					0.75887	0.35191	0.29015	0.33826							0.53535
					0.33222	0.5094	0.31367	0.32645							0.4508
					0.45093	0.63812	0.37481	0.34023							0.6913
					0.61007	1.1922	0.44242	0.27487							0.2506
					0.34699	0.60974	0.31548	0.28931							0.2506
					0.70753	0.69355	0.5605	0.50951							0.43238
					0.38678	0.62386	0.50663	0.44393							0.47115
					0.34646	0.38417	0.50663	0.44393							0.461
					0.33495	0.27842	0.50541	0.48208							0.65414
					0.40422	0.58231	0.33169	0.81315							0.5039
					0.34896	0.49146	0.31283	0.41006							0.37204
					0.29859	0.47996	0.32164	0.45892							0.53121
					0.31806	0.55467	0.55111	0.55499							0.3539
					0.36512	0.23427	0.3202	0.42078							0.32008
					0.36314	0.28461	0.61663	0.41029							0.3642
					0.3591	0.39982	0.34117	0.55433							0.68036
					0.30147	0.43339	0.22238	0.30211							0.25541
					0.70798	0.26186	0.31632	0.65303							0.25541
					0.31895	0.47641	0.55214	0.44645							0.36673
					0.39913	0.33728	0.51592	0.45025							0.42556
					0.31452	0.29432	0.46846	0.34233							0.42556
					0.59391	0.38016	0.39578	0.31261							0.35802
					0.44079	0.32505	0.61974	0.30419							0.46435
					0.44079	0.27063	0.2916	0.28743							0.32125
					0.60085	0.26122	0.46802	0.24091							0.29515
					0.31507	0.23237	0.23793	0.22418							0.29515
					0.35079	0.2694	0.30284	0.3262							0.23623
					0.69076	0.2753	0.26727	0.29642							0.31003
					0.44933	0.1786	0.30949	0.31453							0.34096
					0.56582	0.44006	0.30949	0.46228							0.31539
					0.58152	0.22678	0.32301	0.41352							0.16835
					0.29439	0.18076	0.31454	0.39153							0.20983
					0.40486	0.34444	0.28277	0.27475							0.24139
					0.44375	0.28104	0.32177	0.3628							0.19854
					0.33852	0.23953	0.32177	0.60129							0.23852
					0.3246	0.2549	0.49141	0.31994							0.35866
					0.41585	0.19312	0.57235	0.39819							0.22458
					0.53588	0.26203	0.39464	0.3221							0.28861
					0.63055	0.35712	0.5471	0.43786							0.24911
					0.50084	0.29833	0.49259	0.5919							0.25122
					0.60718	0.35102	0.47559	0.57277							0.37593
					0.60718	0.38172	0.41412	0.57277							0.26835
					0.42445	0.38709	0.41412	0.31521							0.24742
					0.28198	0.35822	0.37552	0.52371							0.32326
					0.49721	0.3606	0.75354	0.4036							0.57078
					0.66969	0.16908	0.71894	0.45942							0.33061
					0.40741	0.4189	0.29424	0.26821							0.35693
					0.44022	0.39113	0.63777	0.37049							0.34948
					0.70605	0.27729	0.51907	0.34148							0.22711
					0.56768	0.26384	0.56296	0.51715							0.25432
					0.68253	0.37112	0.80578	0.37883							0.2463
					0.64932	0.37112	0.52444	0.60501							0.41243
					0.33891	0.25512	0.58678	0.51964							0.73119
					0.34233	0.19528	0.60273	0.31695							0.26319
					0.27781	0.36584	0.66706	0.44198							0.46402
					0.33094	0.36406	0.68484	0.34249							0.46401
					0.53494	0.32349	0.42015	0.48229							0.74893
					0.38168	0.26425	0.42015	0.32062							0.44561
					0.67696	0.30631	0.42015	0.27396							0.42595
					0.34364	0.26449	0.36376	0.33309							0.32834
					0.28846	0.25096	0.43807	0.27585							0.458
					0.39006	0.29104	0.41061	0.27964							0.48688
					0.48109	0.34092	0.66229	0.36858							0.41666
					0.36939	0.57954	0.31685	0.62206							0.44755
					0.40967	0.3266	0.61099	0.71222							1.0057
					0.33596	0.20763	0.59245	0.71222							0.23259
					0.41278	0.31788	0.62082	0.73863							0.25276
					0.3395	0.39651	0.39272	0.47091							0.19435
					0.29448	0.37052	0.38372	0.5004							0.19186
					0.37634	0.45089	0.62892	0.58756							0.15893
					0.45537	0.24644	0.42672	0.43121							0.22228
					0.55694	0.17139	0.50202	0.46799							0.24914
					0.64831	0.21685	0.69567	0.24872							0.24914
					0.31121	0.23651	0.69567	0.33294							0.23121
					0.37847	0.29468	0.54293	0.52764							0.17892
					0.25567	0.32583	0.56329	0.40037							0.21791
					0.65562	0.26822	0.38629	0.2205							0.28064
					0.57755	0.50691	0.56858	0.51337							0.33811
					0.7608	0.41817	0.64732	0.46126							0.26841
					0.2566	0.28331	0.61379	0.37795							0.35361
					0.49533	0.3091	0.61379	0.2812							0.26252
					0.35203	0.19087	0.42358	0.36144							0.31997
					0.41538	0.40577	0.4346	0.29605							0.50527
					0.36585	0.43016	0.86485	0.43136							0.30823
					0.40621	0.7025	0.76457	0.3762							0.33218
					0.46065	0.3817	0.76457	0.36284							0.40116
					0.23258	0.57596	0.34569	0.35442							0.4455
					0.46683	0.27205	0.39846	0.30465							0.32429
					0.48952	0.54542	0.45047	0.49519							0.31206
					0.34725	0.54542	0.25697	0.29492							0.18682
					0.52274	0.51225	0.41567	0.51597							0.4445
					0.32805	0.71368	0.46076	0.46304							0.20606
					0.30879	0.75147	0.56798	0.88647							0.20606
					0.41054	0.72229	0.45149	0.4966							0.44905
					0.35842	0.22502	0.45149	0.80011							0.66375
					0.32057	0.3636	0.56945	0.25942							0.41433
					0.50338	0.28569	0.56945	0.63063							0.39367
					0.61899	0.23017	0.44631	0.46361							0.22428
					0.39037	0.37147	0.32759	0.46361							0.28949
					0.42327	0.34075	0.72458	0.49142							0.15703
					0.61033	0.25187	0.47148	0.25213							0.27471
					0.586	0.44246	0.2753	0.57368							0.23787
					0.23484	0.32323	0.7603	0.35958							0.18255
					0.26144	0.63786	0.4149	0.6344							0.14666
					0.31619	0.68353	0.45596	0.41042							0.14914
					0.38871	0.42212	0.84699	0.22014							0.18558
					0.62574	0.83528	0.3609	0.38521							0.96379
					0.37959	0.365	0.73784	0.55705							0.36548
					0.46527	0.27603	0.53345	0.72518							0.21425
					0.47115	0.37063	0.58464	0.28626							0.32641
					0.5321	0.51743	0.52361	0.32618							0.30791
					0.34778	0.26698	0.52361	0.27709							0.27926
					0.21666	0.54577	0.43489	0.50565							0.5542
					0.26823	0.22032	0.55518	0.51873							0.36582
					0.3906	0.33265	0.55518	0.3715							0.31393
					0.33458	0.19463	0.85905	0.53089							0.35727
					0.32063	0.29421	0.42427	0.78888							0.46383
					0.27898	0.62669	0.42427	0.32348							0.61073
					0.56405	0.58249	0.56849	0.42666							0.37107
					0.9486	0.2592	0.9863	0.4037							0.28209
					0.3878	0.31171	0.67877	0.76209							0.39032
					0.36786	0.28939	0.72488	0.43441							0.45209
					0.36786	0.2451	0.47865	0.34227							0.30569
					0.29093	0.5113	0.56876	0.46187							0.31294
					0.2792	0.29876	0.64372	0.38782							0.63299
					0.49926	0.55464	0.55812	0.36753							0.45461
					0.57021	0.41323	0.41283	0.37342							0.46715
					0.33608	0.45094	0.50042	0.32232							0.55683
					0.32603	0.35668	0.34436	1.0471							0.52326
					0.32603	0.33862	0.8011	0.40984							0.3473
					0.33532	0.33862	0.8011	0.19693							0.32101
					0.27238	0.40064	0.49951	0.25579							0.63106
					0.31905	0.41783	0.46754	0.41397							0.56894
					0.45799	0.43115	0.68472	0.37364							0.40913
					0.32002	0.45957	0.5347	0.43471							0.31178
					0.42499	0.35234	0.43688	0.50873							0.92895
					0.33418	0.69679	0.52854	0.29907							0.42249
					0.53282	0.63806	0.68216	0.37673							0.351
					0.40588	0.63806	0.42538	0.65811							0.38204
					0.28277	0.39112	0.42179	0.18557							0.47085
					0.3722	0.28807	0.68364	0.53456							0.31644
					0.29178	0.36933	0.43557	0.4128							0.5672
					0.46604	0.35346	0.67873	0.41097							0.51362
					0.44443	0.42721	0.43743	0.3806							0.42713
					0.20561	0.35057	0.75052	0.51946							0.56644
					0.78645	0.33957	0.43725	0.3823							0.37459
					0.30912	0.47556	0.36243	0.32172							0.39651
					0.51895	0.37659	0.40091	0.32181							0.52738
					0.36081	0.42126	0.27545	0.23729							0.44657
					0.30541	0.34241	0.45958	0.33293							0.52387
					0.34696	0.30943	0.46003	0.33293							0.67659
					0.33118	0.253	0.40255	0.52002							0.67659
					0.36651	0.30422	0.44458	0.40756							0.46476
					0.30094	0.19901	0.75972	0.60144							0.25747
					0.22276	0.25048	0.71678	0.6325							0.31034
					0.37251	0.36971	0.65535	0.25587							0.38761
					0.35075	0.36971	0.65535	0.26584							0.25865
					0.32885	0.27462	0.45698	0.49344							0.55388
					0.27952	0.26342	0.98657	0.48035							0.42121
					0.31758	0.5007	1.0615	0.99961							0.43039
					0.86227	0.70555	0.5951	0.33623							0.31766
					0.37538	0.2649	0.73696	0.5129							0.51853
					0.4687	0.33365	0.61387	0.45987							0.25416
					0.47565	0.33462	0.53284	0.32006							0.31543
					0.34619	0.28082	0.65921	0.53939							0.3286
					0.33356	0.27605	0.65195	0.38994							0.41087
					0.42562	0.22319	0.71185	0.66364							0.29345
					0.56048	0.43681	0.42567	0.44971							0.30278
					0.35717	0.43681	0.50022	0.40934							0.2465
					0.35872	0.25809	0.56414	0.4301							0.28324
					0.31185	0.24072	0.51151	0.42767							0.37271
					0.46799	0.21889	0.35776	0.30947							0.37271
					0.36452	0.24642	0.46912	0.31324							0.4231
					0.41659	0.23402	0.41492	0.52358							0.4231
					0.28523	0.59797	0.40408	0.60078							0.28327
					0.58633	0.52495	0.40942	0.49813							0.28757
					0.88202	0.61852	0.45746	0.39076							0.23973
					0.30575	0.34415	0.85088	0.33585							0.28337
					0.33738	0.37088	0.31648	0.32337							0.23548
					0.31358	0.33124	0.76447	0.22214							0.30034
					0.59282	0.4867	0.41458	0.19002							0.34454
					0.40714	0.39481	0.42463	0.24177							0.39005
					0.39629	0.3555	0.42463	0.297							0.4041
					0.44959	0.15217	0.40354	0.19207							0.78951
					0.91031	0.32364	0.4177	0.36769							0.33476
					0.54719	0.34886	0.61244	0.4223							0.26603
					0.6245	0.19694	0.41929	0.48235							0.54174
					0.61006	0.23394	0.37308	0.3123							0.59198
					0.2594	0.19529	0.56663	0.32771							0.45311
					0.74609	0.19529	0.65549	0.34328							0.32943
					0.65738	0.23267	0.28861	0.392							0.62288
					0.3691	0.576	0.50409	0.36568							0.47506
					0.2984	0.69075	0.55592	0.35046							0.41537
					0.27622	0.19022	0.4376	0.39873							0.35525
					0.50067	0.42212	0.82262	0.4512							0.26926
					0.44156	0.32544	0.52654	0.46513							0.25386
					0.49166	0.36047	0.32587	0.31741							0.35689
					0.47342	0.2164	0.68113	0.32509							0.39293
					0.37231	0.18235	0.61314	0.23023							0.33538
					0.31879	0.18235	0.42233	0.20505							0.69199
					0.39585	0.3576	0.8171	0.52677							0.62258
					0.40083	0.26491	0.75039	1.3431							0.23045
					0.56357	0.39541	0.73699	0.62339							0.43238
					0.6354	0.41372	0.47183	0.53266							0.31916
					0.48639	0.37323	0.68926	0.51707							0.25304
					0.39817	0.31863	1.1631	0.49187							0.30434
					0.36721	0.23152	0.56233	0.43803							0.29147
					0.37451	0.22765	0.56986	0.35163							0.25125
					0.4029	0.22721	0.64946	0.18638							0.25125
					0.26695	0.21596	0.4621	0.18638							0.44812
					0.34389	0.20332	0.63923	0.20441							0.44812
					0.27079	0.37366	0.48646	0.19004							0.26668
					0.29677	0.35621	0.91264	0.14608							0.24782
					0.24611	0.32357	0.63059	0.15135							0.79088
					0.68299	0.22148	0.74664	0.18117							0.29146
					0.54203	0.34368	0.49066	0.20461							0.30901
					0.24163	0.24885	0.57812	0.17675							0.32429
					0.1943	0.24308	0.30462	0.2259							0.259
					0.42401	0.21251	0.67173	0.18735							0.60404
					0.39925	0.28365	0.37673	0.18735							0.4287
					0.30215	0.44469	1.1838	0.52687							0.44796
					0.4896	0.49315	0.56183	0.18968							0.28621
					0.38228	0.24066	0.52941	0.1816							0.29139
					0.42855	0.44697	0.4977	0.26923							0.34357
					0.48082	0.32575	0.4977	0.17562							0.27353
					0.43362	0.28025	0.50103	0.13648							0.24221
					0.16889	0.35179	0.42849	0.18121							0.34741
					0.44783	0.16058	0.42841	0.18365							0.36605
					0.2749	0.37807	0.48994	0.16147							0.36605
					0.3283	0.62843	0.74054	0.13725							0.37411
					0.3506	0.65575	0.57158	0.18292							0.33492
					0.31266	0.26997	0.63101	0.1763							0.29956
					0.38619	0.28145	0.63307	0.16474							0.43225
					0.30128	0.42856	0.42148	0.23752							0.35253
					0.23409	0.33474	0.45915	0.14363							0.25216
					0.45822	0.33474	0.3972	0.12418							0.25216
					0.47446	0.73306	0.5887	0.70659							0.18003
					0.46473	0.73306	0.5887	0.46001							0.31337
					0.25025	0.50866	0.64209	0.25556							0.29821
					0.28799	0.35128	0.49276	0.48224							0.36471
					0.28799	0.24326	0.40697	0.43432							0.26428
					0.3441	0.36124	0.40697	1.1123							0.26788
					0.76872	0.3849	0.60816	0.24428							0.80139
					0.35558	0.47869	0.29204	0.21877							0.80139
					0.6407	0.22051	0.59144	0.23839							0.51364
					0.34379	0.23492	0.65125	0.14616							0.45822
					0.28059	0.17791	0.37968	0.15634							0.47045
					0.30349	0.41301	0.40207	0.16241							0.47045
					0.25643	0.38482	0.40207	0.16506							0.42531
					0.40713	0.32479	0.4553	0.24515							0.21288
					0.63376	0.30331	0.48896	0.15635							0.33763
					0.21783	0.30328	0.59186	0.16456							0.38744
					0.47566	0.23436	0.47919	0.52063							0.51866
					0.31604	0.33397	0.47919	0.44149							0.38351
					0.40359	0.40912	0.41115	0.16328							0.29187
					0.2907	0.23919	0.41115	0.47691							0.35584
					0.21681	0.50718	0.54607	0.79601							0.31711
					0.26414	0.79998	0.67969	0.583							0.58041
					0.39906	0.31532	0.66482	0.64023							0.3748
					0.23796	0.25546	0.65865	0.42023							0.57117
					0.22853	0.25794	0.36587	0.202							0.27558
					0.44147	0.27013	0.4942	0.51846							0.55963
					0.44147	0.88287	0.39804	0.91345							0.3844
					0.30897	0.32105	0.47815	0.82094							0.30496
					0.42487	0.32105	0.47815	0.56807							0.39262
					0.29153	0.32105	0.29594	0.62595							0.41754
					0.52738	0.48648	0.41929	0.29214							0.22452
					0.21804	0.27478	0.4567	0.50123							0.35876
					0.30762	0.26631	0.46466	0.38638							0.34825
					0.44019	0.33168	0.33636	0.70214							0.4749
					0.30696	0.33031	0.4189	0.39805							0.28728
					0.31167	0.24766	0.44337	0.37841							0.42676
					0.25727	0.24141	0.59092	0.34726							0.61084
					0.34382	0.31587	0.59092	0.2805							0.39073
					0.20991	0.31587	0.4835	0.29619							0.44742
					0.47095	0.27961	0.44101	0.33268							0.29353
					0.31331	0.38222	0.38057	0.45247							0.21847
					0.21821	0.28962	0.49732	0.21101							0.58842
					0.22422	0.33635	0.4973	0.15528							0.24045
					0.36723	0.31844	1.0931	0.15503							0.31589
					0.36723	0.53143	0.55599	0.20031							0.2233
					0.37349	0.57454	0.72893	0.16519							0.18792
					0.37948	0.45579	0.43141	0.16519							0.43704
					0.42644	0.47773	0.54153	0.16519							0.42853
					0.41764	0.49404	0.53997	0.26859							0.37026
					0.28741	0.3314	0.3863	0.15375							0.32413
					0.22032	0.37804	0.44116	0.16476							0.22708
					0.2921	0.43173	0.58479	0.16476							0.28594
					0.22041	0.56804	0.52612	0.26445							0.32169
					0.24958	0.33748	0.90062	0.18156							0.70961
					0.25058	0.38549	0.43115	0.19759							0.28233
					0.62151	0.4146	0.53136	0.16114							0.31725
					0.45441	0.68759	0.49489	0.17042							0.5335
					0.36556	0.3108	0.5322	0.18869							0.30201
					0.46959	0.71616	0.39289	0.18869							0.32101
					0.45637	0.33432	0.55613	0.78084							0.56022
					0.30098	0.1983	0.55613	0.48271							0.35612
					0.31023	0.2053	0.45604	0.64046							0.36679
					0.35726	0.13423	0.38449	0.29023							0.20335
					0.35726	0.44873	0.47109	0.28273							0.39564
					0.2621	0.43099	0.44734	0.28273							0.34833
					0.35579	0.39498	0.74936	0.32102							0.2332
					0.2219	0.25742	0.86684	0.38309							0.36003
					0.19268	0.32745	0.3456	0.3208							0.32241
					0.22356	0.25425	0.59319	0.22748							0.27227
					0.27534	0.31515	0.56686	0.3906							0.31017
					0.26752	0.66189	0.56686	0.32566							0.68149
					0.32949	0.23328	0.40423	0.28077							0.68149
					0.32949	0.36349	0.33763	0.36065							0.20461
					0.32691	0.19068	0.84409	0.42542							0.45992
					0.35504	0.19212	0.49839	0.28639							0.3636
					0.31996	0.20943	0.3225	0.37722							0.65604
					0.33005	0.19211	0.62827	0.21795							1.0722
					0.46387	0.33755	0.43692	0.23274							0.9185
					0.61323	0.2293	0.61437	0.26262							0.26234
					0.62364	0.24868	0.652	0.23184							0.25627
					0.48397	0.24595	0.40723	0.16639							0.24898
					0.25866	0.21356	0.49698	0.20034							0.44711
					0.37266	0.18893	0.53472	0.22148							0.46785
					0.24504	0.27133	0.35069	0.23082							0.32013
					0.28468	0.31116	0.35069	0.16371							0.26305
					0.63539	0.31116	0.43042	0.159							0.24413
					0.59197	0.20114	0.50337	0.1861							0.24048
					0.53098	0.20114	0.44477	0.22971							0.67148
					0.2917	0.24896	0.58733	0.19473							0.43427
					0.2926	0.16937	0.79791	0.171							0.34163
					0.31353	0.16766	0.5432	0.16015							0.27742
					0.16369	0.3321	0.31066	0.17429							0.43668
					0.25734	0.37335	0.32828	0.19389							0.52147
					0.25734	0.24571	0.39187	0.17915							0.24549
					0.23689	0.22522	0.56751	0.29717							0.24549
					0.29592	0.22624	0.37618	0.21069							0.20174
					0.36764	0.21343	0.68687	0.21069							0.48709
					0.50583	0.18866	0.69658	0.13824							0.45677
					0.50583	0.18866	0.35828	0.18479							0.45677
					0.22875	0.16532	0.29501	0.17433							0.35152
					0.35655	0.21365	0.77903	0.14048							0.47838
					0.40675	0.30131	0.27594	0.18002							0.2218
					0.31421	0.19962	0.36661	0.19768							0.35105
					0.44121	0.212	0.38264	0.20121							0.4499
					0.4922	0.2303	0.49112	0.1869							0.2972
					0.2876	0.19973	0.42865	0.16911							0.41625
					0.2405	0.23001	0.37651	0.17092							0.47017
					0.21442	0.21411	0.42543	0.22315							0.44102
					0.23841	0.22066	0.36894	0.24943							0.40073
					0.21454	0.21865	0.29529	0.15594							0.39478
					0.27327	0.26334	0.24982	0.14092							0.29381
					0.37004	0.25952	0.23203	0.21032							0.20357
					0.34658	0.26715	0.34226	0.1758							0.23034
					0.2074	0.20814	0.26893	0.14661							0.23034
					0.28987	0.21939	0.25435	0.16224							0.47259
					0.20976	0.23143	0.26539	0.21385							0.37117
					0.18733	0.48578	0.41363	0.21385							0.38752
					0.18275	0.30949	0.17609	0.20996							0.18138
					0.20389	0.32368	0.3148	0.47544							0.24754
					0.31163	0.22924	0.28901	0.36826							0.31872
					0.24414	0.23285	0.53577	0.58107							0.16166
[truncated: 5,341 more rows]
