# Supplementary material for: Inhibition gates supralinear Ca2+ signaling in Purkinje cell dendrites during practiced movements
Source: eLife. 2018 Aug 17;7:e36246. doi: 10.7554/eLife.36246 (PMC6120752; doi:10.7554/eLife.36246)
Supplement: Figure 1—source data 1. [file elife-36246-fig1-data1.xlsx]

## Sheet: Figure 1
Panel D		Movement												No Movement
	Time	Mouse 1	Mouse 2	Mouse 3	Mouse 4	Mouse 5	Mouse 6	Mouse 7	Mouse 8	Mouse 9	Mouse 10	Mouse 11		Mouse 1	Mouse 2	Mouse 3	Mouse 4	Mouse 5	Mouse 6	Mouse 7	Mouse 8	Mouse 9	Mouse 10	Mouse 11
	-0.2338	-0.000558735	-0.000507715	0.000387339	-0.000961222	-0.00214698	-0.00142034	0.00133554	-0.00073239	-0.000387926	-0.00143167	0.00217684		-0.00265087	-0.00265698	0.000338089	-0.00145161	0.00162703	0.00316678	0.00220399	-0.00206741	0.00263157	-0.000667709	-0.00421601
	-0.2004	-0.000704053	-0.00311452	-0.00362479	-0.000494695	-0.0055981	-0.00458238	0.00228641	-0.000995314	-0.00487909	0.000625637	-0.000909435		-0.00225165	0.00979649	-0.00413251	0.000530313	0.000808823	0.0012552	0.00679423	-0.00129656	-0.00278398	-0.000688035	0.00456466
	-0.167	-0.00285087	0.00226752	-0.00389827	-0.001566	-0.000425699	-0.00568192	-0.00391732	-0.00101284	-0.00196605	0.00046276	-0.00246181		-0.0025135	-0.00289676	-0.00475489	0.00271176	-0.00446483	0.000405412	-0.00280542	-0.00308841	-0.00347367	-0.00189918	-0.00267212
	-0.1336	-0.00145382	-0.000812375	-0.00031627	-0.00171003	0.000698241	-0.000564092	-0.00376622	-0.00261161	-0.00099155	0.000155218	-0.00260095		-0.00310127	0.00283016	-0.00498748	0.004168	7.58897e-05	-0.00439002	-0.00743091	0.00107645	-0.0034953	-0.0016476	-0.001576
	-0.1002	-0.00147296	-0.000729403	0.000180958	-0.001311	-0.00163996	-0.00590107	0.00216341	-0.00247334	0.000345203	0.000145437	-0.00946284		-0.00355926	0.00274114	-0.00400543	0.00125427	0.00456124	-0.00378424	-0.00354721	-0.000731593	-0.00531977	0.000479876	-0.00593993
	-0.0668	-0.00557217	2.27478e-06	0.00294056	-5.39621e-06	-0.000197561	-0.00567241	-0.00732482	-0.0026049	0.00119352	-0.00196307	-0.0127688		-0.00783921	-0.00154444	-0.000242722	0.00455465	0.00434403	0.00397976	-0.00483605	-0.00276203	-0.00293754	-0.00041802	-0.0151838
	-0.0334	0.00272073	-0.0143072	0.0258968	-0.00309545	0.00490127	-0.00416546	-0.0121747	-0.000636963	0.00216632	0.00135615	-0.0293661		-0.00228216	-0.01811	0.0276372	-0.00405576	0.0101218	0.00241627	-0.0115348	-0.00307983	-0.000201557	-0.00783508	-0.0411641
	0	0.225041	0.19163	0.263926	0.212641	0.257791	0.20664	0.202124	0.223753	0.240483	0.244221	0.187211		0.227021	0.178621	0.282294	0.200477	0.233012	0.23905	0.245582	0.20499	0.268753	0.207922	0.168234
	0.0334	0.211544	0.149007	0.235184	0.179742	0.214891	0.169284	0.159475	0.198434	0.209918	0.207768	0.127139		0.217362	0.139076	0.261318	0.169758	0.194434	0.208514	0.216819	0.173701	0.241217	0.17011	0.112871
	0.0668	0.17271	0.111599	0.193351	0.135081	0.159469	0.129101	0.119903	0.153452	0.160474	0.154762	0.0867568		0.176925	0.0961637	0.219733	0.126211	0.125948	0.146793	0.14897	0.133913	0.1817	0.121588	0.0753373
	0.1002	0.135205	0.0800774	0.160811	0.0991236	0.114725	0.0906796	0.0811676	0.115795	0.118919	0.111077	0.0618627		0.136781	0.0667169	0.162888	0.0899736	0.0875837	0.110903	0.105858	0.0990591	0.125584	0.0832204	0.0511996
	0.1336	0.102495	0.0602385	0.131467	0.067116	0.0756231	0.0636893	0.0560395	0.0831219	0.0827359	0.0786728	0.0454567		0.10633	0.0512275	0.129436	0.0657747	0.0572936	0.074243	0.0844528	0.0706244	0.0761585	0.0593522	0.030892
	0.167	0.0759829	0.0442735	0.10426	0.0463043	0.0508901	0.0414458	0.038415	0.0591166	0.0574321	0.056787	0.0296619		0.0766226	0.0393084	0.0961772	0.0466564	0.0432932	0.0514581	0.0539844	0.0515456	0.0520777	0.0385418	0.0209033
	0.2004	0.0532112	0.0287078	0.0833571	0.0321571	0.0332919	0.02499	0.0317063	0.0415703	0.0378177	0.0390248	0.0177531		0.0570144	0.0283759	0.0734714	0.0322424	0.0322601	0.0467854	0.037071	0.0355932	0.0345749	0.025569	0.0143851
	0.2338	0.038035	0.0215729	0.0640471	0.0197975	0.0194959	0.0146956	4.84975e-05	0.0248315	0.0280049	0.0265918	0.0104404		0.041537	0.0232374	0.0486303	0.0226273	0.0228388	0.0235521	0.0305783	0.025408	0.0203313	0.0155624	0.0113219
	0.2672	0.0261939	0.0130488	0.0547745	0.0132884	0.00989211	0.00802515	0.00302246	0.0149015	0.0153119	0.0186852	0.00507447		0.0298807	0.0143834	0.0389329	0.0199607	0.0173005	0.0210787	0.0172535	0.0204717	0.0121634	0.00882759	0.0122849
	0.3006	0.0159895	0.0104721	0.0438984	0.0073929	0.00363684	0.00915485	-0.00265469	0.00656926	0.010691	0.0119055	-0.000960375		0.0197473	0.00770867	0.0306051	0.0146581	0.0207958	0.0150146	0.00845817	0.0125781	0.0110785	0.00255439	0.0151806
	0.334	0.0107694	0.00761582	0.0321996	0.00334684	-0.00186461	0.00405221	-0.000513735	0.0010715	0.0046811	0.00482622	-0.00369757		0.0122576	0.00634819	0.0157375	0.00705298	0.0124323	0.0016963	-0.00139671	0.00922412	0.00810878	-0.00174837	-3.70395e-05
	0.3674	0.00637492	0.00802976	0.0238993	-0.000975785	-0.00906842	0.000485019	-0.0124055	-0.000482424	0.000382472	0.00227222	-0.00598734		0.00732992	0.00460323	0.00878803	0.00801998	0.0061409	-8.39205e-05	0.00594533	0.00529364	0.0101074	-0.00472662	0.0078433
	0.4008	0.00242249	0.0058088	0.0175278	-0.00291333	-0.0133126	-0.0086223	-0.00975967	-0.00480492	-0.00409575	6.49979e-05	-0.00194755		0.00191843	0.000212237	0.00152954	0.00417923	0.0021326	0.0103071	0.00103004	0.0043275	0.00868113	-0.00626355	-0.000182397
	0.4342	-0.00183075	0.00125436	0.0119696	-0.00584338	-0.0152452	-0.00778786	-0.0108205	-0.00822923	-0.00618526	-0.00288757	-0.00396227		0.000924315	-0.000430865	-0.00164654	0.00429733	0.00769204	0.0063664	0.000879767	-0.000331161	0.00286731	-0.00617549	-0.000320154
	0.4676	-0.00263836	0.0040239	0.00690055	-0.00663035	-0.0151483	-0.00808925	-0.012805	-0.0104482	-0.00631484	-0.00563983	-0.00179399		-0.0036287	-0.00117629	-0.0082581	0.00300966	0.00453498	0.00459092	0.00183256	-0.00392885	0.00419914	-0.00685714	-0.00385633
	0.501	-0.00421604	-0.000746223	0.0057029	-0.00739404	-0.0146521	-0.0139176	-0.0085659	-0.011589	-0.00442257	-0.00763194	-0.0112482		-0.00494857	0.00265583	-0.0127358	0.000757255	0.00352501	-0.000100306	0.00436952	-0.00440643	0.00121509	-0.00671519	-0.00812851
Panel G
		-0.2 to -0.4	0 to +0.2	+1 to +1.2
	Mouse 1	0.218084	0.221023	0.220001
	Mouse 2	0.21003	0.161769	0.192782
	Mouse 3	0.242745	0.209159	0.217858
	Mouse 4	0.189986	0.247408	0.232857
	Mouse 5	0.205663	0.218982	0.174401
	Mouse 6	0.124556	0.140324	0.156234
