# Supplementary material for: Inhibition gates supralinear Ca2+ signaling in Purkinje cell dendrites during practiced movements
Source: eLife. 2018 Aug 17;7:e36246. doi: 10.7554/eLife.36246 (PMC6120752; doi:10.7554/eLife.36246)
Supplement: Figure 2—figure supplement 1—source data 1. [file elife-36246-fig2-figsupp1-data1.xlsx]

## Sheet: Figure 2 Supp 1
Panel A		Control								CNO
	Time	Mouse 1	Mouse 2	Mouse 3	Mouse 4	Mouse 5	Mouse 6	Mouse 7		Mouse 1	Mouse 2	Mouse 3	Mouse 4	Mouse 5	Mouse 6	Mouse 7
	-0.2338	-0.00364688	0.00352138	-0.012277	-0.00406406	0.00306025	0.00144922	0.00152359		-0.0139097	-0.00219515	-0.00780408	0.000297886	0.00315482	-0.00833552	-0.0060134
	-0.2004	-0.000898335	-0.00525252	-0.0209724	0.00149509	-0.00767127	-0.00565822	0.0125904		0.000166853	-0.00690076	0.00175699	-0.0015449	-0.00180421	-0.00413386	-0.0102953
	-0.167	-0.00892003	0.00638069	0.000526911	-0.00104475	-0.00195802	0.000972638	0.00188546		0.0142492	-0.010762	0.00133698	-0.00608767	-0.00632132	0.00836113	-0.00327742
	-0.1336	-0.0199566	0.00668896	-0.00918455	0.0018985	0.0013465	0.00940422	-0.00429549		0.0207121	0.00353293	0.00447089	-0.0124284	0.00362915	0.0120747	0.0028968
	-0.1002	-0.00407892	-0.00427917	0.0176077	-0.00101085	0.00118869	0.00184147	0.00438494		0.00796466	0.00211221	0.0190058	-0.00791225	0.00701903	0.00699498	0.00127373
	-0.0668	0.00691375	-0.00213038	-0.00445247	-9.63067e-05	-0.000737483	-0.00369027	0.00255242		-0.0152648	-0.00316847	0.0251629	0.00145171	0.0150846	0.0162037	0.00726318
	-0.0334	-0.00504074	-0.00203056	0.00116589	0.00566601	0.000197171	0.000741638	-0.0193762		0.000718519	-0.00299316	0.0390414	0.0286777	0.0389503	0.0616407	0.0352964
	0	0.231399	0.261966	0.1532	0.223825	0.233406	0.235165	0.18911		0.30383	0.265098	0.263769	0.346002	0.378855	0.433751	0.347882
	0.0334	0.189383	0.220209	0.114987	0.194545	0.199808	0.190603	0.14931		0.258944	0.240554	0.22243	0.334786	0.347098	0.414308	0.322599
	0.0668	0.146461	0.157562	0.0475654	0.15487	0.155073	0.142989	0.109247		0.19147	0.190262	0.160401	0.269827	0.27776	0.334506	0.245923
	0.1002	0.0910734	0.114591	0.0546142	0.115895	0.115024	0.0980979	0.0596735		0.13748	0.125138	0.11754	0.206384	0.206611	0.248984	0.203708
	0.1336	0.0673397	0.0737062	0.0595533	0.0884301	0.087267	0.0691984	0.0397512		0.0979226	0.096165	0.0923698	0.180568	0.170424	0.190794	0.167808
	0.167	0.196397	0.218036	0.147027	0.210494	0.212599	0.178824	0.159937		0.257225	0.234699	0.185354	0.344075	0.32354	0.344841	0.308226
	0.2004	0.259997	0.310829	0.206697	0.296548	0.338753	0.295743	0.240356		0.379738	0.36455	0.258649	0.457586	0.497811	0.500257	0.452921
	0.2338	0.238696	0.264459	0.150763	0.25732	0.286223	0.253155	0.189916		0.35115	0.331524	0.250056	0.420333	0.483034	0.460769	0.437549
	0.2672	0.19161	0.21334	0.148717	0.211373	0.254903	0.209051	0.163566		0.316127	0.269064	0.193463	0.373389	0.402611	0.407672	0.353636
	0.3006	0.17236	0.203016	0.07943	0.17574	0.218546	0.176528	0.122727		0.251875	0.214884	0.151985	0.337653	0.336049	0.339751	0.303554
	0.334	0.14536	0.160829	0.0730035	0.146857	0.195563	0.158573	0.113574		0.179421	0.193797	0.157519	0.319656	0.280137	0.283707	0.248055
	0.3674	0.106959	0.12341	0.145694	0.125987	0.159652	0.130954	0.102866		0.148917	0.152858	0.130015	0.280097	0.267424	0.241713	0.204703
	0.4008	0.0779235	0.104597	0.0727248	0.10852	0.127852	0.112039	0.0824549		0.137168	0.13271	0.102019	0.238255	0.23445	0.211742	0.179572
	0.4342	0.0691431	0.101528	0.064393	0.0916722	0.109978	0.0893564	0.0808582		0.134252	0.130558	0.0792873	0.226499	0.210853	0.173423	0.152329
	0.4676	0.0739953	0.124286	0.0590649	0.0793606	0.0899801	0.0719753	0.0775732		0.100725	0.112924	0.0891665	0.195223	0.18222	0.146294	0.138707
	0.5	0.0658665	0.137547	0.0102332	0.0674831	0.070534	0.059139	0.0810903		0.0872195	0.106263	0.0850274	0.17176	0.162463	0.137917	0.147865
Panel B		Control								CNO
		Mouse 1	Mouse 2	Mouse 3	Mouse 4	Mouse 5	Mouse 6	Mouse 7		Mouse 1	Mouse 2	Mouse 3	Mouse 4	Mouse 5	Mouse 6	Mouse 7
		0.4591	0.20628	0.20628	0.554	0.38787	0.61907	0.49011		1.4316	1.27	0.36338	0.74889	0.60528	1.061	1.0791
		0.62166	0.20628	0.20628	0.48052	0.29541	0.4084	0.60838		1.1082	0.6544	0.53735	0.62137	0.73046	0.68283	0.64639
		1.7397	0.18156	0.18156	0.52229	0.27819	0.72524	0.69776		1.1797	1.3907	0.32929	0.63241	0.8832	0.42199	0.46077
		1.0183	0.38298	0.38298	0.79586	0.23258	0.25857	0.65515		1.4854	1.2597	0.32442	1.0346	0.77023	0.8969	0.62117
		1.0307	0.22996	0.22996	0.50148	0.29103	0.23749	0.42598		0.983	1.5079	0.38304	1.2347	2.2054	0.6483	0.64523
		0.91655	0.20351	0.20351	0.4966	0.3151	0.34513	0.60801		1.8144	2.2095	0.24725	1.3376	0.98492	0.78684	0.47903
		0.60272	0.26344	0.26344	0.43837	0.3151	0.34032	1.4441		0.95719	0.49175	0.72506	0.97308	0.86639	0.57134	0.52083
		0.66415	0.26462	0.26462	1.0453	0.23521	0.42135	0.69636		1.7363	0.4256	0.7461	1.6662	0.90792	0.36328	0.42039
		0.45863	0.26539	0.26539	0.51102	0.27381	0.39554	0.89873		1.0039	0.60564	0.39781	1.0029	0.85779	0.69599	0.50206
		1.1449	0.19376	0.19376	0.57523	0.30385	0.24357	0.57295		1.9896	0.48889	0.47408	1.0029	0.70011	0.40655	0.74878
		2.4089	0.35624	0.35624	0.57298	0.23211	0.40101	0.63718		1.2516	0.53856	0.55262	2.0039	0.93873	0.64886	0.86619
		0.83583	0.49311	0.49311	0.60264	0.23687	0.44626	0.96388		1.6869	1.0647	0.39898	0.80721	1.1278	0.75722	0.45028
		1.7018	0.76206	0.76206	0.64725	0.32552	0.39763	0.89728		1.0727	0.80753	0.58506	1.1814	1.1278	0.53971	0.50566
		1.1382	0.23927	0.23927	1.0609	0.31166	0.60017	0.36819		1.7346	0.35265	0.88693	0.69928	0.76577	0.55827	0.39964
		0.58661	0.31077	0.31077	0.39644	0.40998	0.47617	0.56172		1.5666	0.62703	0.46251	0.79622	1.0608	0.56545	0.39739
		0.89713	0.22867	0.22867	0.38787	0.35722	0.40069	0.40628		1.3463	0.72785	0.87095	0.70881	0.76686	0.78246	0.59576
		0.89713	0.34873	0.34873	0.3484	0.29483	0.749	0.49052		1.7182	0.50244	0.70674	1.1598	0.90947	0.64198	0.40665
		0.57328	0.21659	0.21659	0.43792	0.2951	0.59768	0.43598		1.5393	0.54276	0.76011	0.82535	1.1855	0.76529	0.58286
		0.59918	0.25792	0.25792	0.87226	0.30616	0.39275	0.50895		1.3092	0.71588	0.31515	0.73243	0.49101	0.98514	0.44702
		2.1589	0.24664	0.24664	0.59771	0.34256	0.40613	0.54318		1.5324	0.97841	0.38001	0.58144	0.57092	0.43484	0.57668
		0.61126	0.23649	0.23649	0.58253	0.34256	0.40921	0.66431		1.7565	0.27103	0.44852	2.0511	0.73552	0.53359	0.34172
		1.0886	0.22047	0.22047	0.60203	0.5024	0.43032	0.55458		0.89029	1.2006	0.30084	1.4583	0.97188	0.85185	0.657
		1.0249	0.22791	0.22791	0.77342	0.55147	0.47948	0.31071		1.196	1.2323	0.23379	1.7051	0.60657	1.0907	0.57064
		1.7901	0.32087	0.32087	0.4128	0.61933	0.46069	0.7314		1.342	0.48233	0.23379	0.99295	0.59842	0.65717	0.5192
		1.3038	0.29197	0.29197	0.61029	0.3858	0.60155	0.46647		1.0781	0.78139	0.29854	1.0754	0.81709	1.2015	0.39902
		0.76559	0.18523	0.18523	0.58289	0.251	0.51765	0.46647		1.168	0.6654	0.26625	0.74037	1.0449	0.69274	0.39902
		0.66527	0.14569	0.14569	0.66122	0.23241	0.52209	0.55295		0.74297	0.65701	0.23588	1.1534	1.7291	0.69274	0.39902
		0.55615	0.26151	0.26151	0.29269	0.235	0.6506	0.50861		0.94494	0.54337	0.29543	1.0969	0.97201	0.72575	0.39902
		1.2411	0.25995	0.25995	0.56077	0.28619	0.4306	0.50376		0.74235	0.46739	0.27263	0.74476	0.82521	0.94874	0.35983
		0.68601	0.33929	0.33929	0.43804	0.26206	0.89948	0.51335		0.642	0.49775	0.3519	0.52197	1.1237	0.84649	0.37319
		0.77627	0.42377	0.42377	0.32444	0.31529	0.60844	0.48826		0.59091	0.56483	0.81341	0.38466	0.63707	0.95739	0.39902
		0.80378	0.24281	0.24281	0.41129	0.28263	0.39239	0.63751		0.89463	0.61509	0.18116	0.78749	0.87608	0.64749	0.39092
		0.77406	0.28176	0.28176	0.45933	0.32765	0.31174	0.49483		0.66882	0.54042	0.22753	1.3047	0.8526	0.78895	0.45756
		0.14326	0.30468	0.30468	0.44614	0.36476	0.31785	0.52838		0.83948	0.63474	0.28665	1.5803	0.90652	0.88019	0.40678
		0.1876	0.40238	0.40238	0.59202	0.34445	0.61878	0.81662		0.55329	1.0459	0.25646	0.99542	0.88124	0.53556	0.4581
		0.39705	0.17314	0.17314	0.41315	0.24953	0.32552	0.42441		0.89624	0.73552	0.25262	0.56972	0.93999	0.80064	0.37691
		1.1952	0.16827	0.16827	0.45872	0.2443	0.38004	0.46543		1.1323	0.81391	0.23863	0.76112	1.2204	0.96966	0.29729
		0.59006	0.2044	0.2044	0.3958	0.6953	0.48866	0.53368		0.67341	0.74504	1.0532	0.86962	1.1191	1.0147	0.47238
		0.22121	0.3115	0.3115	0.62836	0.26656	0.43181	0.43019		0.32263	0.23429	0.17877	0.73616	0.68268	0.54033	0.49662
		0.47692	0.28763	0.28763	0.53951	0.21568	0.45164	0.66235		0.57992	1.1114	0.19879	1.1638	1.14	0.77728	0.35308
		0.31202	0.23273	0.23273	0.62372	0.58675	0.25129	0.3753		0.38356	0.37785	0.23783	0.70926	1.0966	0.71267	0.73225
		0.48257	0.17659	0.17659	0.39311	0.55642	0.25892	0.48846		0.55162	1.6163	0.85437	0.65664	1.247	1.4708	0.32933
		0.45599	0.34464	0.34464	0.44518	0.5316	1.2309	0.50158		0.43239	0.41542	0.20714	1.2291	0.7802	0.81401	0.77158
		0.49303	0.35186	0.35186	0.47685	0.49716	0.36943	0.50158		0.41299	1.1313	0.53495	1.1165	1.6097	1.127	0.56905
		0.46207	0.32474	0.32474	0.44811	0.2453	0.36943	0.54683		0.71207	1.0447	0.57368	0.76986	0.82827	0.90659	0.57408
		0.62971	0.32474	0.32474	0.47178	0.27053	0.94202	0.54279		0.811	0.46851	0.22988	0.66438	1.3207	1.1809	0.50522
		0.14818	0.41266	0.41266	0.91998	0.39106	0.61942	0.46555		0.8963	0.50495	0.87091	0.70043	0.69486	1.2542	0.37753
		0.3462	0.24734	0.24734	0.54296	0.31183	0.8664	0.5344		0.54332	0.68288	0.58535	0.95952	0.72932	0.52753	0.53706
		0.58581	0.30393	0.30393	0.50765	0.25332	0.31663	0.41143		0.21067	0.73502	0.58535	1.0708	0.80888	0.94011	0.35127
		0.58581	0.39242	0.39242	0.55238	0.31193	0.4017	0.43657		0.53728	0.90095	0.64696	0.41715	0.6564	0.84523	0.38007
		0.79119	0.2593	0.2593	0.64315	0.49726	0.33192	0.48579		0.46627	0.90095	0.5061	0.51282	0.70343	1.1365	0.44148
		0.43053	0.26286	0.26286	0.48944	0.58925	0.36423	0.40754		0.78486	0.59066	0.4904	0.55085	1.1261	1.0066	0.40422
		0.22237	0.4102	0.4102	0.63298	0.59094	0.44275	0.36837		0.5054	0.77758	1.0426	1.1513	0.553	1.1406	0.53937
		0.17267	0.83868	0.83868	0.58297	0.2793	1.0376	0.7283		0.62995	0.49479	0.738	0.69305	1.1547	0.68815	0.45726
		0.74153	0.90426	0.90426	0.40609	0.31919	0.49383	0.52226		0.46469	0.42491	0.44382	0.81789	1.3425	0.62419	0.69434
		0.28933	0.30003	0.30003	0.88514	0.45633	0.38677	0.52975		0.49202	0.40532	0.30063	0.96257	0.8431	0.64478	0.74609
		0.55177	0.29021	0.29021	0.96162	0.29623	0.41702	0.36808		0.82952	0.44807	0.26014	1.529	1.304	1.1521	0.5664
		0.55177	0.2327	0.2327	0.47514	0.41988	0.37169	0.3984		0.47664	0.44216	0.47741	1.0798	1.4192	0.44944	0.65923
		1.2144	0.19231	0.19231	0.46287	0.33732	0.52039	0.65148		0.38015	0.99906	0.44825	0.92393	1.4501	1.6256	0.46408
		0.89507	0.23507	0.23507	0.54377	0.77312	0.70721	0.6282		0.4475	0.67502	0.68628	1.1328	1.7494	1.2898	0.64446
		0.35006	0.18376	0.18376	0.34191	0.79673	0.49012	0.61884		0.7743	0.62015	0.42681	0.55568	1.3735	1.2898	0.64446
		0.24899	0.18376	0.18376	0.53534	0.46905	0.35823	0.61693		0.64231	0.78868	0.20116	1.8618	1.5193	0.75664	0.31788
		1.5586	0.20299	0.20299	1.0755	0.48046	0.37857	0.47883		1.0619	0.72916	0.61494	0.72492	0.43349	0.67934	0.27087
		0.44977	0.17298	0.17298	0.55277	0.93443	0.32515	0.53344		0.52662	0.64363	0.80669	0.97006	0.63346	0.97835	0.51099
		0.35295	0.24476	0.24476	0.41799	0.42235	0.38054	0.53344		0.45339	0.45545	0.39991	0.89199	0.8855	0.78749	0.34478
		0.7351	0.23275	0.23275	0.34788	0.45688	0.38767	0.70707		0.99084	0.68913	2.0131	0.58587	1.491	0.99536	0.74549
		0.33621	0.22929	0.22929	0.45548	0.30991	0.44698	0.42912		1.0239	1.1268	0.61141	1.1366	0.93111	0.9255	0.74549
		0.33042	0.21056	0.21056	0.53436	0.39693	0.90121	0.71534		0.62616	0.81042	0.1799	0.69233	0.83641	0.78088	0.32051
		0.4585	0.2549	0.2549	0.47473	0.46167	0.37851	0.74843		0.73897	0.57361	0.1914	0.75256	1.389	0.84811	0.34723
		0.22615	0.36649	0.36649	0.47473	0.48708	0.43354	0.47692		0.35644	0.56226	0.3548	0.46564	1.1921	0.7475	0.34723
		0.31529	0.24716	0.24716	0.38432	0.38718	0.3614	0.47935		0.36566	0.69679	0.15921	0.60089	0.84237	0.94166	0.4138
		0.37254	0.42406	0.42406	0.4889	0.67841	0.52285	0.36603		0.36566	0.44512	0.32213	0.5525	1.1491	0.64565	0.61632
		0.37254	0.54629	0.54629	0.57235	0.85704	1.0064	0.54089		0.29	0.85925	0.17629	0.80988	0.85989	0.55362	0.48622
		0.73426	0.63826	0.63826	0.5094	0.51951	0.99087	0.40206		0.35911	0.38152	0.17225	0.68102	1.5621	1.049	0.50522
		0.23473	0.25603	0.25603	0.41622	0.52052	0.43986	0.58564		0.43104	0.60099	0.25095	0.75467	1.5614	1.0049	0.32641
		0.23473	0.21377	0.21377	0.67168	0.28881	0.31028	0.44274		0.33056	0.39203	0.2911	0.83992	1.6701	0.59379	0.48987
		0.168	0.41303	0.41303	0.45095	0.26175	0.36867	0.57565		0.34787	0.39203	0.23301	0.47838	0.81957	0.7288	0.82794
		0.2331	0.53345	0.53345	0.42684	0.81109	0.44796	0.66172		0.40314	0.48008	0.76176	1.3449	2.4353	0.68144	0.47693
		0.27487	0.48527	0.48527	0.70914	0.83279	0.28421	0.55965		0.44551	0.54475	0.83974	1.2453	2.1059	0.82718	0.54142
		0.39681	0.77582	0.77582	0.62358	0.37278	0.62856	0.47944		0.34584	0.63613	0.36556	1.0662	1.3306	0.55962	0.29644
		0.61166	0.68502	0.68502	0.60129	0.63545	0.53533	0.47944		0.42746	0.48502	0.25129	0.5848	0.66603	0.97916	0.56703
		0.19252	0.34554	0.34554	0.43373	0.54987	0.3413	0.38743		0.46486	0.51411	0.4067	0.70766	0.93561	0.97916	0.54004
		0.20176	0.27768	0.27768	0.60864	0.66588	0.86553	0.382		0.28424	0.37102	0.2893	0.9455	1.2574	1.0519	0.50589
		0.27542	0.39037	0.39037	0.37183	0.71841	0.63013	0.40577		1.2091	0.42853	0.26344	1.2338	1.9367	0.61024	0.50589
		0.32931	0.30099	0.30099	0.78623	0.71963	1.5643	0.51569		0.50657	0.45259	0.30384	0.6806	1.5057	0.55959	0.31494
		0.20625	0.53612	0.53612	0.84735	0.8494	0.48475	0.53408		0.46525	0.35265	1.2126	0.91823	0.72261	0.80842	0.30657
		0.22238	0.53513	0.53513	0.42271	0.35533	0.53472	0.34889		0.57402	0.28905	0.68425	0.61159	0.56664	0.82107	0.58256
		0.29008	0.41263	0.41263	0.54023	0.34672	0.61295	0.48052		0.57402	0.34685	0.60476	1.3219	1.045	0.4793	0.5349
		0.415	0.41803	0.41803	0.60363	0.77594	0.48427	0.4448		0.25919	0.47111	1.1484	1.523	1.045	1.1397	0.5349
		0.30289	0.47356	0.47356	0.44379	0.39975	0.76089	0.80893		0.50069	0.29769	0.6737	1.1134	0.96922	0.7279	0.26806
		0.31126	0.30445	0.30445	0.37	0.39444	1.0679	0.49614		0.54824	0.28343	0.78232	0.76858	0.64389	0.7975	0.31059
		0.41502	0.51103	0.51103	0.55871	0.24781	1.082	0.4268		0.54513	0.292	0.53998	0.90764	0.89523	0.98748	0.41997
		0.32464	0.26932	0.26932	0.8302	0.3517	0.53429	0.69872		0.40761	0.55341	0.53998	1.1496	0.49102	0.98748	0.34465
		0.18003	0.38277	0.38277	0.50313	0.33587	0.45597	0.61228		0.94235	0.62459	0.93298	0.67757	1.4911	0.68424	0.40805
		0.20737	0.28707	0.28707	0.52209	0.31476	0.44966	0.40918		0.53707	0.47716	0.99004	0.27695	1.0295	0.8243	0.40474
		0.22243	0.59739	0.59739	0.36505	0.38271	0.24875	0.40918		1.083	0.55547	0.68761	0.5541	0.92057	0.64522	0.55386
		0.22521	0.65292	0.65292	0.29522	0.38453	0.82309	0.49488		0.40517	0.48041	0.31963	0.88179	0.96439	0.68428	0.43507
		0.2872	0.56272	0.56272	0.37502	0.4275	0.28568	0.49488		0.41826	0.36958	0.77962	0.58316	0.37043	0.69721	0.38478
		0.42207	0.30813	0.30813	0.83622	0.57476	0.36858	0.57259		0.2289	1.1373	0.68726	0.58316	0.42417	0.93871	0.35766
		0.33594	0.37182	0.37182	0.53462	0.56721	0.44391	0.5637		0.3896	0.65887	0.88237	0.87879	0.38315	0.93871	0.31826
		0.25335	0.30183	0.30183	0.41194	0.63576	0.41673	0.53129		0.43191	0.94977	0.84392	1.1711	0.77853	1.5536	0.44168
		0.27933	0.34756	0.34756	0.36442	0.36567	0.36642	0.62564		0.31967	1.033	0.40937	1.3353	1.8906	0.59515	0.29873
		0.29261	0.20241	0.20241	0.52662	0.74671	0.47587	0.72186		1.0661	1.252	0.48811	0.61326	1.7967	0.84221	0.37383
		0.63259	0.44631	0.44631	0.58478	0.27904	0.36062	0.69491		0.47106	1.3036	0.67655	0.3916	1.3208	0.75271	0.37383
		0.38895	0.32294	0.32294	0.46618	0.42871	0.3724	0.39505		0.42904	0.46259	0.47736	0.46975	1.2835	0.64978	0.37383
		0.23786	0.37989	0.37989	0.42891	0.44111	0.85013	0.40279		1.2366	0.53857	0.34254	0.32014	0.33749	0.79143	0.30831
		0.46746	0.41741	0.41741	0.46647	0.3873	0.83585	0.42453		1.184	1.0583	0.6397	0.54926	0.28292	0.55931	0.3792
		0.20477	0.31452	0.31452	0.37622	0.31956	0.27877	0.4414		0.46082	0.20859	0.44987	0.70178	0.53998	1.2598	0.27539
		0.35188	0.26138	0.26138	0.37766	0.35196	0.54027	0.45381		1.2919	0.33299	0.2748	0.60919	0.53998	0.60631	0.51853
		0.35188	0.30304	0.30304	0.46171	0.6083	0.43498	0.4555		0.6232	0.77723	0.44387	0.91124	0.55144	0.63731	0.30947
		0.32406	0.32362	0.32362	0.55079	0.64033	0.37017	0.77367		0.6232	0.46477	0.37811	0.61739	0.26493	0.94466	0.32674
		0.20542	0.25516	0.25516	0.64022	0.31805	0.46255	0.58793		0.4887	0.37868	0.49529	0.45569	0.49459	1.7347	0.4491
		0.46507	0.28348	0.28348	0.45037	0.51993	0.46255	0.57419		0.85191	0.27073	0.52276	0.63357	0.35308	1.2012	0.23803
		0.15874	0.59194	0.59194	0.34801	0.56991	0.36342	0.41757		0.91812	0.22847	0.45467	1.1155	0.322	0.72339	0.32232
		0.23474	0.29473	0.29473	0.56118	0.51406	0.35567	0.36704		0.46707	0.5811	0.24874	0.84353	0.30006	0.84304	0.49135
		0.23486	0.56533	0.56533	0.44003	0.68009	0.64295	0.35476		0.79744	0.26796	0.1208	0.94632	0.33344	0.78413	0.37216
		0.37625	0.49829	0.49829	0.52317	0.41427	0.64295	0.5111		0.72359	0.34427	0.65033	0.56454	0.31158	0.60237	0.40823
		0.37736	0.33023	0.33023	0.56494	0.37269	0.48204	0.52305		0.61233	0.38015	0.25962	0.52204	0.32887	1.2099	0.52828
		0.35531	0.34255	0.34255	0.42288	0.51242	0.4151	0.52305		0.62587	1.3592	0.4472	1.4887	0.51055	0.50309	0.5307
		0.19141	0.41436	0.41436	0.55985	0.58344	0.27665	0.55201		0.66	1.3592	0.51351	0.85539	0.56883	0.60046	0.39488
		0.25055	0.41436	0.41436	0.39195	0.41968	0.4682	0.53995		0.66	0.61279	0.20486	0.96137	0.57178	0.44059	0.50359
		0.29987	0.39112	0.39112	0.56185	0.66512	0.19033	0.45221		0.88221	0.48842	0.3061	0.34683	0.38185	0.73522	0.26253
		0.3398	0.18089	0.18089	0.27612	0.76306	0.35077	0.45794		0.80987	0.2364	0.51576	0.49598	0.44195	0.54963	0.49434
		0.3398	0.41624	0.41624	0.55247	0.45436	0.22599	0.48012		0.31468	0.24247	1.1042	0.71406	0.43641	0.7333	0.49434
		0.22805	0.3138	0.3138	0.48652	0.47563	0.1638	0.52329		0.61586	0.30587	0.75804	0.45548	0.36724	0.66414	0.32646
		0.3931	0.3194	0.3194	0.83143	0.47563	0.48299	0.36207		0.68266	0.34321	1.0306	0.91881	0.75786	1.1582	0.30269
		0.36366	0.36492	0.36492	0.50895	0.37443	0.42519	0.66697		1.0371	0.3847	0.65907	0.97363	0.68963	0.62959	0.3396
		0.3461	0.50789	0.50789	0.43094	0.5959	0.2363	0.47689		1.0349	0.19518	0.7823	1.305	0.72431	0.45976	0.66462
		0.26025	0.26609	0.26609	0.41099	0.30251	0.52628	0.51015		0.65512	0.22058	0.79692	1.5366	0.63931	0.48513	0.48083
		0.36876	0.26609	0.26609	0.49133	0.99417	0.46263	0.67096		0.67934	0.56407	0.61012	1.1679	0.66033	0.46544	0.38502
		0.33335	0.65508	0.65508	0.62525	0.6052	0.38128	0.50901		0.49344	0.32833	0.63203	1.1109	0.27557	0.39857	0.44317
		0.34936	0.45215	0.45215	0.62904	0.70524	0.64666	0.57112		0.52978	0.26825	1.0076	1.1294	0.35255	0.61671	0.29546
		0.56225	0.45215	0.45215	0.49836	0.55299	0.59754	0.57112		0.45775	0.36052	0.42404	0.65061	0.35255	0.56981	0.3657
		0.15964	0.33371	0.33371	0.47116	0.62146	0.51846	0.6248		1.0738	0.38576	1.0191	0.84528	0.5025	0.46803	0.44629
		0.35108	0.3097	0.3097	0.42278	0.252	0.46859	0.92245		0.71405	1.063	0.41039	0.6877	0.53855	0.46803	0.38453
		0.1663	0.35505	0.35505	0.59435	0.30949	0.34144	0.92328		0.56726	0.63484	0.59861	0.60874	0.40127	0.86829	0.46116
		0.26587	0.54352	0.54352	0.47643	0.57767	0.32504	1.7125		0.45658	0.3632	0.7241	0.71468	1.0161	0.49335	0.54108
		0.39414	0.51103	0.51103	0.92537	0.35601	0.3384	0.6315		0.73615	0.68672	0.63433	0.53047	0.70281	0.72385	0.44504
		0.46793	0.57003	0.57003	0.40398	0.40168	0.54359	0.42276		0.69409	0.33712	0.71603	0.66619	0.48692	1.0532	0.37898
		0.53781	0.51267	0.51267	0.32093	0.5078	0.48386	0.4452		1.0701	0.68643	0.61081	1.8276	0.40988	0.51561	0.34071
		0.23429	0.40895	0.40895	0.37953	0.41953	0.84942	0.43626		0.72615	0.37368	0.89681	0.94112	0.35214	0.88582	0.51007
		0.17634	0.44659	0.44659	0.57601	0.44582	0.75766	0.29317		1.0229	1.1749	0.83386	0.57171	0.51658	0.64025	0.56675
		0.2776	0.38738	0.38738	0.42132	0.46763	0.29946	0.49638		1.2176	0.69777	0.83911	1.4016	0.63429	0.67529	0.57976
		0.2776	0.40187	0.40187	0.46565	0.41541	0.49063	0.49432		1.2846	0.69674	0.55089	1.0657	0.31578	0.67234	0.35009
		1.3789	0.36498	0.36498	0.77502	0.46604	0.69068	0.50789		1.2015	0.35784	1.0728	1.2031	1.21	1.1687	0.47411
		2.4873	0.47172	0.47172	0.82478	0.54858	0.325	0.32633		0.88987	1.04	0.3557	1.0633	1.3488	0.71713	0.57462
		0.51852	0.37338	0.37338	0.53247	0.54858	0.61104	0.64604		0.77871	0.21159	0.83195	0.52266	0.33521	1.6216	0.49075
		0.30267	0.35516	0.35516	0.60959	0.56687	1.3439	0.3285		0.83588	0.21237	0.78751	0.85073	0.24783	0.5674	0.36441
		0.5879	0.41779	0.41779	0.54291	0.56066	0.48526	0.50292		0.82794	0.52191	0.8229	1.1199	0.74803	0.59461	0.4962
		0.50981	0.34344	0.34344	0.5502	0.49512	0.25907	0.46466		0.90542	0.45508	0.72309	1.1199	0.72639	0.85666	0.43476
		0.4164	0.43064	0.43064	0.74578	0.34912	0.80609	0.48755		0.47356	0.24379	0.78621	0.54469	0.82791	0.76146	0.46134
		0.51025	0.44197	0.44197	0.3466	0.42816	0.52881	0.55231		0.69574	0.2406	0.70944	1.1139	0.91174	0.88235	0.37531
		0.51308	0.45462	0.45462	0.69649	0.65359	0.28773	0.55231		0.63133	0.62193	0.55499	0.9743	0.34082	0.8557	0.39686
		0.29326	0.33599	0.33599	0.28782	0.60751	0.58353	0.45007		0.50729	0.23743	0.67515	0.87259	0.71161	0.94283	0.46309
		0.36326	0.35328	0.35328	0.67977	0.54749	0.35608	0.45749		0.81893	0.37862	0.4054	0.48586	0.53616	0.79603	0.54687
		0.41474	0.35789	0.35789	0.43164	0.48424	0.24139	0.40216		0.96386	1.0045	0.78591	0.67654	0.51323	1.3677	0.44749
		0.63774	0.65117	0.65117	0.65103	0.39115	0.32047	0.44092		0.68029	0.48371	0.6647	0.73644	0.34014	1.3126	0.48204
		0.28434	0.34259	0.34259	0.574	0.32482	0.46845	0.6885		0.4954	0.48932	0.7105	0.59304	1.0973	1.2132	0.23164
		0.45572	0.39854	0.39854	0.49915	0.54849	0.27179	0.62487		0.41836	0.46143	0.75592	0.71836	0.55335	1.3429	0.37773
		0.45572	0.40931	0.40931	0.8995	0.3	0.27421	0.61999		0.37216	0.21273	0.55402	0.68876	0.4092	0.81663	0.24565
		0.28264	0.57118	0.57118	0.26495	0.29301	0.62691	0.31771		0.80509	0.22701	0.7702	0.29072	0.39765	0.94827	0.29793
		0.47513	0.50673	0.50673	0.36946	0.5052	0.58624	0.43695		0.84337	0.37765	0.47469	0.71918	0.46763	0.7384	0.4918
		0.47513	0.4596	0.4596	0.63605	0.32259	0.46589	0.49623		1.2664	0.24058	0.42389	0.57898	0.94951	1.4035	0.58084
		0.33433	0.43458	0.43458	0.70468	0.31225	0.47568	0.51663		0.33833	0.29126	0.58267	0.61769	0.29333	0.57378	0.26131
		0.31947	0.43855	0.43855	0.51692	0.21919	0.42979	0.4263		0.60471	0.22045	0.42389	0.6676	1.0089	0.296	0.51133
		0.37131	0.2103	0.2103	0.4817	0.43353	0.51049	0.52005		0.49784	0.23127	0.58267	0.58206	1.0729	0.47549	0.32925
		0.43777			0.43062	0.40283	0.53566	0.52005		0.97254	0.45898	0.52147	0.53186	0.46588	0.49741	0.53584
		0.50783			0.67183	0.63569	0.42203	0.65345		1.0079	0.74324	0.66384	0.53085	0.51846	0.65984	0.28818
		0.23779			0.48579	0.36145	0.48996	0.45179		1.2319	0.28115	0.70752	0.78028	0.68206	0.26542	0.45231
		0.4006			0.49253	0.53119	0.27789	0.80923		0.60958	0.34338	0.54348	0.74957	0.71336	0.61928	0.26432
		0.2845			0.46664	0.5164	0.343	0.44686		0.46667	0.42486	0.563	0.55506	0.59972	1.0852	0.50199
		0.26444			0.70914	0.31241	0.27616	0.4004		0.45414	0.3147	0.27703	0.56201	1.0315	0.5969	0.5015
		0.43318			0.70914	0.48505	0.26846	0.65152		0.46945	0.51704	0.68229	0.7458	1.0508	0.70106	0.48166
		0.30191			0.75143	0.39709	0.31306	0.46022		0.63057	0.54177	0.68229	0.54605	0.61905	0.4938	0.27713
		0.18473			0.53054	0.36291	0.44585	0.35684		0.65967	0.23558	0.30993	0.5529	0.49884	0.4938	0.51997
		0.26161			0.43973	0.36291	0.24165	0.40118		0.55515	0.24523	0.36309	0.63438	0.44696	0.23232	0.30896
		0.26947			0.53043	0.461	0.49468	0.72507		0.53929	0.85319	0.32655	0.59712	0.51489	0.27553	0.35301
		0.27728			0.46871	0.44815	0.38131	0.35141		0.84491	0.29495	0.36537	0.45287	0.43829	0.55979	0.46975
		0.37485			0.46145	0.41964	0.24192	0.42155		0.40751	1.1049	0.23094	0.80662	0.50568	0.46815	0.30706
		0.67915			0.65978	0.54791	0.30226	0.50799		0.62092	0.36091	0.7004	0.85972	0.45319	0.28496	0.3756
		0.27744			0.29276	0.41565	0.33433	0.45499		0.62092	0.49219	0.16397	0.64161	0.32298	0.33612	0.33983
		0.2919			0.8217	0.41068	0.2796	0.38349		0.88943	0.46833	0.3485	0.68976	0.39684	0.33224	0.33275
		0.31224			0.61183	0.55187	0.4498	0.63991		0.8273	0.55186	0.2032	0.88263	0.33819	0.44554	0.2307
		0.27			0.92345	0.50867	0.41045	0.47651		0.64945	0.61576	0.5754	0.6947	0.34634	0.42169	0.4132
		0.39043			0.83785	0.43275	0.55922	0.45307		0.47894	0.67209	0.40181	0.61792	0.67175	1.1137	0.21959
		0.26635			0.48021	0.3106	0.64534	0.46779		0.47894	0.31883	0.20304	0.32206	0.46081	1.2296	0.28336
		0.34446			0.38153	0.35846	0.36813	0.42832		0.82384	0.1998	0.19737	0.9989	0.64185	0.64169	0.33186
		0.88798			0.43828	0.37068	0.78051	0.40921		1.2707	0.2915	0.61374	1.2064	0.44195	0.80759	0.35586
		0.18967			0.43416	0.21098	1.1232	0.4688		0.56893	0.20559	0.54501	0.45179	0.44088	1.3298	0.4296
		0.28564			0.50643	0.38845	0.6931	0.75548		0.29784	0.57816	0.42899	0.69198	0.36401	2.4714	0.43259
		0.43725			0.33985	0.38845	0.70382	0.59172		0.30594	0.26934	0.52315	0.74069	0.29358	1.0932	0.46681
		0.67178			0.58353	0.45584	0.99585	0.5763		0.94089	0.15536	0.50965	0.64032	0.41751	0.72737	0.36178
		0.35838			0.43723	0.45718	0.48096	0.57518		0.28491	0.28965	0.25417	0.64032	0.65421	1.3832	0.45548
		0.3861			0.48732	0.2914	0.46582	0.54355		0.42286	0.81792	0.20169	0.46753	0.59362	1.4655	0.41873
		0.34046			0.56221	0.68927	0.34667	0.50237		1.2747	0.22398	0.36642	0.46647	0.34058	1.909	0.50015
		0.5552			0.55134	0.65799	0.44225	0.43907		0.82308	0.58226	0.29381	0.5381	0.92592	1.5437	0.66244
		0.49856			0.76287	0.55662	0.93145	0.55527		0.97127	0.66963	0.28495	0.78992	0.48345	1.4194	0.54965
		0.43648			0.60078	0.31968	0.85797	0.49543		1.0524	0.31941	0.32979	0.92068	0.48142	1.5404	0.52086
		0.4582			0.61116	0.21141	1.5083	0.4264		0.54929	0.5848	0.20602	1.3514	0.50694	1.3673	0.54179
		0.57948			0.57802	0.43343	0.47544	0.40074		0.96047	1.0166	0.14499	0.31317	0.38988	1.0773	0.44132
		0.52541			0.77669	0.44247	0.63594	0.55899		1.0811	0.92438	0.19184	0.83456	0.38955	1.1414	0.58944
		0.40052			0.44926	0.29672	0.73287	0.50938		0.66973	0.7519	0.17214	1.3857	0.63049	2.012	0.58944
		0.52228			0.43717	0.31274	0.74995	0.56068		1.2057	0.78114	0.18272	0.99129	0.54072	1.8482	0.52897
		0.1841			0.49312	0.4046	0.8849	0.35676		0.51661	2.867	0.18595	0.66677	0.45395	1.7818	0.27514
		0.17394			0.53628	0.2684	1.0733	0.56891		0.46576	0.55795	0.45811	0.82537	0.56238	1.5642	0.31882
		0.50053			0.34463	0.37161	0.90929	0.38481		0.80433	0.60843	0.11778	0.72134	0.56463	1.8675	0.4358
		0.18436			0.6467	0.42614	0.85614	0.57549		1.6268	0.63549	0.13807	0.76019	0.4253	1.8815	0.46822
		0.38925			0.41658	0.46251	0.52087	0.57549		0.72004	0.64996	0.19171	1.3224	0.64726	1.252	0.44391
		0.21079			0.47216	0.55495	0.37249	0.61166		1.0581	0.74572	0.12621	1.813	0.5337	1.9554	0.36266
		0.48819			0.52964	0.32436	0.77976	0.43405		0.65186	0.48295	0.16999	0.9079	0.62179	1.7637	0.5359
		0.30294			0.6843	0.28746	0.55699	0.48664		1.3825	0.58097	0.16999	0.81669	0.94546	2.0823	0.37333
		0.17233			0.70656	0.37823	0.60969	0.4958		0.94964	0.77559	0.45006	1.4027	0.86462	1.6102	0.26037
		0.37318			0.50981	0.32714	0.89526	0.37144		0.4133	2.1772	0.11639	0.50316	0.63633	1.4263	0.37813
		0.37318			0.45647	0.61249	1.0853	0.36526		0.40393	1.3897	0.12269	0.7233	0.64152	1.6715	0.38316
		0.19602			0.54936	0.60102	0.92032	0.4073		0.58085	1.2164	0.16475	0.98544	0.56715	1.439	0.34835
		0.65822			0.5484	0.28205	0.66138	0.42768		0.70471	0.6609	0.16475	0.85517	0.98	1.5365	0.52555
		0.27938			0.67359	0.28668	0.67844	0.58309		0.45121	0.71449	0.18577	0.82901	1.0107	1.3107	0.36993
		0.31892			0.44935	0.76845	0.6942	0.41236		0.36573	0.75631	0.19719	0.86474	1.1127	1.5637	0.36993
		0.35428			0.44348	0.56028	0.29951	0.33683		0.82311	0.71235	0.10127	1.7632	0.43853	1.7402	0.29112
		0.29708			0.53471	0.58111	0.65217	0.44922		0.99287	2.0586	0.17329	1.4271	0.39179	1.2625	0.38636
		0.25223			0.45844	0.58111	0.71267	0.46997		0.33813	0.79134	0.16621	1.9125	0.95412	2.0976	0.38636
		0.19087			0.4903	0.39123	0.83934	0.33726		0.24798	0.77127	0.10419	0.73775	0.44934	2.0976	0.47992
		0.53497			0.50583	0.51877	0.9372	0.54665		0.42874	0.68906	0.11566	1.2089	0.44952	1.5013	0.49449
		0.27044			0.44572	0.51877	0.87879	0.64665		0.37231	0.85808	0.098609	1.1754	0.71731	1.514	0.37253
		0.34553			0.484	0.46007	0.527	0.58127		0.49042	0.78984	0.11567	0.97399	0.69241	1.3377	0.31385
		0.27981			0.52525	0.485	0.527	0.58127		0.62918	0.40069	0.10503	0.86633	0.33906	1.6639	0.35261
		0.24345			0.32523	0.485	0.63871	0.37943		0.50285	0.5025	0.14157	0.52867	0.44325	2.5562	0.35261
		0.53523			0.27206	0.71791	0.54428	0.48262		0.54131	0.53138	0.29654	0.85658	0.40462	2.5384	0.37223
		0.32695			0.45371	0.53349	0.4295	0.48262		0.77332	0.64561	0.88147	0.63449	0.53031	3.5638	0.24434
		0.19021			0.37981	0.66673	0.45888	0.57392		1.6317	1.4562	0.99983	0.6702	1.0677	2.3667	0.51407
		0.27733			0.64467	0.54342	0.5345	0.63139		1.5922	1.3156	0.6108	0.6702	0.55049	1.6247	0.49819
		0.23306			0.56752	0.32598	0.62741	0.63256		0.59994	1.0848	0.61961	1.0246	0.36934	1.7434	0.30009
		0.33566			0.60356	0.29734	0.45849	0.63256		0.60435	0.88163	0.26502	1.1185	0.74841	1.3933	0.42631
		0.36538			0.36796	0.38504	0.81193	0.49916		0.53162	1.5892	0.69523	0.57039	0.77871	1.5819	0.56462
		0.25863			0.64397	0.49137	0.45649	0.78109		0.49262	0.34686	0.62343	0.4498	0.77871	1.5554	0.3054
		0.25863			0.38315	0.43589	0.5783	0.72217		0.49262	1.3673	0.55664	0.65973	0.49209	3.035	0.66258
		0.2976			0.34171	0.30848	0.6733	0.72217		0.386	0.4409	0.10216	0.93408	0.48613	2.1055	0.68632
		0.77108			0.70331	0.33007	0.58258	0.52772		0.77252	0.56395	0.20251	0.70989	0.73074	2.3622	0.37668
		1.3988			0.54479	0.49797	0.55904	0.43834		0.89427	0.56395	0.1996	0.583	0.61753	1.5994	0.32063
		0.30841			0.3282	0.57468	0.41558	0.67895		0.57835	0.43332	1.1972	0.70245	0.66568	1.2971	0.81287
		0.38635			0.50215	0.31451	0.77502	0.47204		0.67858	0.51273	0.26947	0.72301	0.81122	4.3082	1.4557
		0.21746			0.96241	0.66211	0.53845	0.65611		0.64615	0.66914	0.24801	0.72594	0.65872	2.2719	0.57782
		0.33716			0.6512	0.36371	0.32343	0.34163		0.95918	0.49304	0.15989	0.95728	0.5918	1.2186	0.66229
		0.45331			0.3251	0.55973	0.60337	0.42804		0.53105	0.57487	0.38384	0.75113	0.5918	3.3119	0.83353
		0.3926			0.40802	0.2365	0.61575	0.68388		0.51815	0.57174	0.1002	0.52706	0.29504	1.4662	1.1539
		0.6469			0.49884	0.49582	0.76469	0.36933		0.60828	0.64275	0.11878	0.73449	0.64564	0.83977	0.89102
		0.82718			0.33335	0.42744	0.76469	0.3686		0.32766	0.83344	0.085039	0.81041	0.45367	0.74067	0.54109
		0.35154			0.92504	0.42887	1.1104	0.53824		0.77861	0.92923	0.068023	0.61677	0.39619	1.2493	0.34853
		0.64402			0.79341	0.46482	0.52616	0.34555		0.4404	0.56163	0.08252	0.79861	1.0275	2.1369	0.22973
		0.32965			0.37641	0.37578	0.42541	0.4334		0.67556	0.60166	0.13684	0.74517	0.86334	1.4554	0.3138
		0.37338			0.48987	0.55113	0.46153	0.46965		0.52859	0.86601	0.19663	0.63745	0.93628	1.2471	0.25822
		0.34164			0.55296	0.42581	0.43789	0.3997		0.53113	0.88729	0.17872	0.72416	1.1952	1.2407	0.57928
		0.36851			0.42083	0.43877	1.3819	0.3997		0.52074	1.0183	0.21569	0.6652	0.83606	1.2701	0.45283
		0.36851			0.50905	0.39618	0.77339	0.39826		0.51904	0.68216	0.13246	0.69552	0.83606	1.0035	0.32307
		0.54766			0.35867	0.41839	0.93436	0.53626		1.2663	0.58546	0.28312	0.62892	0.61276	1.9139	0.30569
		0.59463			0.31522	0.224	0.39947	0.45471		0.81748	1.1586	0.28252	0.64255	0.29532	0.88238	0.48147
		0.54891			0.41496	0.2911	0.61973	0.53815		0.52631	0.67954	0.38629	0.78515	0.49118	1.9437	0.37208
		0.24515			0.48314	0.59218	0.46191	0.51075		0.81252	1.1377	0.34792	0.78515	0.53511	1.7082	0.30481
		0.37828			0.34734	0.55594	0.41973	0.73827		0.4971	1.1088	0.21745	1.0239	0.42981	4.015	0.41352
		1.2286			0.39545	0.538	0.93989	0.73827		0.61537	0.84778	0.39814	1.1723	0.41941	1.2277	0.38119
		0.75196			0.44888	0.4817	0.92386	0.63742		0.60157	1.0645	0.1107	1.0797	0.44394	1.7571	0.27652
		0.54806			0.45226	0.63867	0.61696	0.50432		0.7612	0.63955	0.6046	0.77565	0.83503	1.535	0.52089
		0.3592			0.52701	0.36212	0.5184	0.94856		1.4096	0.55371	0.20163	1.05	0.48639	1.0629	0.37949
		0.46293			0.54471	0.41714	0.61631	0.97462		0.42118	0.66129	0.15745	0.94075	0.89573	1.8497	0.39246
		0.50377			0.56517	0.41714	0.69125	0.74061		1.7026	1.6027	0.81073	0.73819	0.83454	2.1	0.49006
		0.4399			0.55149	0.62833	0.89801	0.77792		0.2997	1.8838	0.32762	0.77663	0.51947	1.6037	1.1696
		0.47922			0.33507	0.62508	0.39056	0.46883		0.61545	1.2043	0.1767	1.0017	0.37348	2.5295	1.1298
		0.31353			0.352	0.73015	0.49917	0.37178		0.86385	0.58169	0.10505	1.8466	0.444	1.0475	1.3487
		0.79104			0.35592	0.42947	0.61303	0.39302		0.39446	0.52837	0.3882	2.2542	0.444	0.86305	1.1571
		0.40014			0.5027	0.78302	0.36981	0.55505		0.74148	0.43826	0.52134	0.95021	0.52508	0.96075	0.60104
		0.31724			0.31561	0.37961	0.29491	0.51789		0.86345	0.60107	0.29484	0.75629	0.43709	1.3139	1.1031
		0.95751			0.3836	0.38964	0.33525	0.3859		0.63152	0.60834	0.53401	1.2662	0.52777	1.6018	1.6062
		0.33854			0.33285	0.4596	0.46115	0.34948		1.0001	0.71521	0.4339	0.48139	0.39366	0.93832	1.0178
		0.37644			0.48398	0.42436	0.52396	0.48811		0.99793	0.45192	0.48281	0.63413	0.48018	1.5245	0.62267
		0.38197			0.87497	0.39333	1.2709	0.48811		0.65709	0.63222	0.56612	0.73499	0.3996	1.0086	1.0334
		0.21089			0.47743	0.49878	0.72029	0.44123		0.60026	0.63222	0.61995	0.73972	0.31685	1.2437	1.6664
		0.32785			0.50346	0.42391	0.72981	0.42008		0.56444	0.64754	0.40475	0.62342	0.39777	1.91	1.3074
		0.24536			0.50957	0.39883	1.7728	0.56384		1.4164	0.87861	0.64802	0.72676	0.36114	3.2272	0.61376
		0.31491			0.65677	0.34809	0.84053	0.5206		0.90958	0.55585	0.37106	0.77338	0.38375	0.98957	0.75774
		0.15993			0.59943	0.37041	0.54729	0.3664		0.47361	0.58939	0.25669	0.46719	0.42721	1.316	0.61376
		0.15462			0.62124	0.2082	0.96705	0.472		0.46492	1.195	0.18833	0.72058	0.61693	1.1796	0.75774
		0.33546			0.68031	0.24547	0.39511	0.60249		0.77943	0.63423	0.2327	1.0713	0.57722	1.4093	0.61376
		0.46567			0.50291	0.49126	0.59582	0.59497		0.80068	0.77404	0.67233	2.1312	0.36753	1.7836	0.75774
		0.43966			0.6406	0.92307	0.7877	0.53801		1.0182	1.5523	0.30422	1.9863	0.54454	1.2624	0.65724
		0.43966			0.61427	0.55921	0.99032	0.59638		0.46094	1.4243	0.58448	0.79611	1.3245	1.4901	0.61376
		0.77761			0.24316	0.5047	0.48172	0.50877		0.80171	0.95194	0.53549	1.453	0.31479	0.76487	0.75774
		0.8204			0.38054	0.5505	0.74715	0.50877		0.67039	0.55026	0.30153	0.88048	0.45897	2.8799	0.55999
		0.52554			0.38054	0.50588	0.71182	0.38325		0.729	0.67041	0.2847	0.7331	0.47764	1.2468	0.65724
		0.3533			0.34916	0.56055	0.68409	0.44314		0.71732	2.1194	0.57155	0.62339	0.47642	1.7777	0.61376
		0.37081			0.33335	0.67976	0.5373	0.46187		1.125	0.5194	0.69458	0.58825	0.33311	1.8365	0.75774
		0.35614			0.27876	0.39753	0.71865	0.64041		0.51265	1.4117	0.31891	0.96295	0.32913	1.485	0.27755
		0.35614			0.78558	0.31468	0.71865	0.62233		0.41497	0.9782	0.51383	1.8169	0.53476	1.2843	0.53164
		0.62705			0.49851	0.47038	1.0803	0.62233		0.6221	1.0726	0.30363	0.91231	0.56779	2.349	0.63388
		0.15903			0.49851	0.45434	0.80984	0.48173		0.93182	1.2454	0.40605	1.0692	0.6276	1.0083	0.68745
		0.25184			0.44171	0.27775	0.95217	0.45831		0.57988	0.75997	0.32773	1.0401	0.54491	1.3259	0.8574
		0.49463			0.42232	0.80056	0.64009	0.48077		1.0066	1.6611	0.19284	1.1649	1.0003	1.4956	0.85923
		0.54888			0.39484	0.6785	1.5291	0.66487		1.0066	0.77669	0.21768	0.80679	0.83673	2.2368	1.2992
		0.25756			0.55716	0.31481	1.7197	0.4286		0.92117	0.80339	0.32019	1.0048	0.83673	1.4321	1.2992
		0.67438			0.40522	0.38464	2.021	0.35012		0.61341	0.82958	0.32019	0.77001	0.68392	1.7515	0.60957
		0.39939			0.61304	0.33129	0.98779	0.48799		1.0497	0.56647	0.23329	0.7385	0.55789	1.2551	1.1332
		0.32817			0.39317	0.33129	0.76007	0.46622		1.0508	1.7366	0.59522	0.59498	0.94293	0.47234	1.1332
		0.41773			0.46398	0.34054	0.96054	0.63141		0.93121	1.4991	0.57054	0.62559	0.82926	0.44387	0.65142
		0.45841			0.5135	0.51617	0.96054	0.33351		1.2854	0.80638	0.57054	0.42682	1.3354	0.49181	1.4443
		0.38818			0.43002	0.23776	1.3664	0.53783		0.51268	0.90136	0.52806	0.5723	0.83913	0.66008	1.183
		0.36353			0.40901	0.26523	1.0804	0.5638		0.74966	1.3635	0.23738	0.92632	0.95613	0.30985	1.0102
		0.33525			0.39764	0.60594	0.70503	0.5638		0.89296	1.3195	0.25524	0.78758	0.89384	1.9285	0.46547
		0.33198			0.52937	0.45446	0.65662	0.57646		1.0529	1.2525	0.26339	0.96443	0.56988	1.9736	0.54642
		0.67659			0.65369	0.36689	0.6465	0.66621		0.51825	1.0535	0.70784	0.65883	0.54718	1.0705	0.89691
		0.2432			0.52996	0.3784	0.78802	0.57017		0.79058	0.52444	0.24682	1.2484	0.54718	1.4805	0.6027
		0.48087			0.49915	0.3784	1.4454	0.57992		0.98086	0.98056	0.35541	1.7727	0.90536	1.1426	0.70156
		0.50496			0.43189	0.35477	1.3348	0.69286		0.98086	0.47713	0.33152	0.85158	0.89223	2.0531	0.64655
		0.4734			0.33134	0.24509	1.3348	0.55255		0.49519	0.75046	0.2428	1.5378	1.5239	1.1318	0.4409
		0.50727			0.5447	0.59181	0.88881	0.55255		0.4704	0.32178	0.28487	0.51416	2.0853	2.5954	0.68886
		0.50727			0.2755	0.25471	0.99525	0.52534		0.74539	0.76075	0.6142	0.77959	0.92869	0.54726	0.5572
		0.79758			0.30432	0.25874	0.91939	0.53515		0.73091	0.76484	0.24281	0.52587	1.3759	1.2035	0.44022
		0.61325			0.56272	0.24588	0.93084	0.70022		0.79038	0.83468	0.2085	0.97229	1.375	0.68024	0.84875
		0.60052			0.86433	0.20735	2.0439	0.41549		0.6284	1.1204	0.20953	0.75071	0.48127	1.0309	0.66427
		0.60052			0.54435	0.25533	0.84402	0.40673		0.58651	0.90361	0.25056	0.57383	0.92408	0.90519	1.37
		0.43753			0.45917	0.23735	0.76214	0.57452		1.0471	0.84029	0.29831	0.9505	1.0006	3.1015	0.59104
		0.33508			0.44998	0.74645	0.78753	0.55394		0.81399	0.55591	0.13764	0.76509	1.0103	0.86709	0.56808
		0.29314			0.43016	0.30247	0.43939	0.61111		0.87474	0.5312	0.18612	0.65759	0.55955	0.94912	0.49927
		0.25796			0.63491	0.24499	1.4453	0.5185		0.68808	1.7097	0.34064	0.77418	0.84978	1.8161	0.33209
		0.3137			0.54203	0.28171	0.79285	0.50501		0.78647	0.96604	0.11524	0.57735	0.61242	2.8836	0.52141
		0.44243			0.46758	0.2967	0.7581	0.56626		0.50094	0.56909	0.22432	0.69614	0.39128	2.3339	0.65553
		0.38478			0.52563	0.46345	0.78562	0.57691		0.5783	0.43662	0.21077	0.87036	0.32966	1.6069	1.2241
		0.44607			0.37944	0.32063	0.71359	0.5402		0.68314	1.6578	0.33001	0.65317	0.7535	0.94654	0.57397
		0.46816			0.29801	0.41549	0.83329	0.41834		0.69475	1.522	0.21692	1.323	1.2143	1.1836	0.35372
		0.34264			0.24687	0.35423	0.39988	0.62179		0.60025	0.73298	0.35154	1.5159	2.048	2.5086	0.71464
		0.48132			0.31038	0.23792	0.42518	0.48697		0.72771	1.0352	0.32175	1.1982	0.44708	2.7854	0.64995
		0.46388			0.27799	0.38197	0.96287	0.69344		0.52484	0.54662	0.4053	0.70889	0.42323	1.4725	0.6148
		0.37336			0.47768	0.36805	0.45462	0.53836		0.69776	1.7234	0.28474	0.72661	1.2248	1.2618	0.59748
		0.39949			0.45172	0.54083	0.46296	0.71115		0.52058	0.96105	0.30807	0.78175	1.2248	1.7807	0.49074
		0.39557			0.31309	0.61704	0.84055	0.71115		0.62451	0.66111	0.38641	0.62482	1.2248	3.0811	0.42695
		0.33503			0.31309	0.40417	0.51103	0.46858		0.77499	0.61786	0.20387	0.74971	0.49419	2.4651	0.55995
		0.60473			0.37379	1.3004	0.42002	0.51011		0.57319	1.2834	0.41122	0.52876	0.58407	1.3955	0.57497
		0.73586			0.41766	1.2478	0.39903	0.59206		0.52255	1.0623	0.25153	0.62038	0.66251	1.8022	0.37697
		0.31637			0.2956	0.63961	0.44452	0.80426		0.45943	0.95078	0.20768	0.80159	0.4132	1.2378	0.40592
		0.81761			0.42768	0.56364	0.4992	0.5047		0.49861	1.3016	0.28106	0.75698	1.0918	1.6322	0.88798
		0.98527			0.32806	0.40903	0.56936	0.75971		0.62235	1.3462	0.34435	1.6853	0.39268	1.5377	0.43175
		0.56221			0.42916	0.3531	0.67059	0.49187		0.49982	1.1197	0.22369	1.2768	0.4203	1.2398	0.54025
		0.37023			0.26179	0.28583	0.45165	0.80492		0.66335	0.82153	0.16286	0.92503	1.3466	1.1648	0.5728
		0.58684			0.35509	0.63409	0.24318	1.0754		0.94137	1.4975	0.36174	0.61561	0.49853	1.2424	0.46493
		0.40917			0.31811	0.69411	0.69481	0.72455		0.57113	1.2773	0.28502	0.32029	0.54921	1.7143	0.70223
		0.23247			0.54157	0.45624	0.65448	0.68032		0.47381	1.607	0.31496	0.94652	0.74356	1.8193	0.70236
		0.49921			0.28921	0.49435	0.94895	1.0055		0.66247	1.7119	0.33228	0.60283	0.51452	1.2928	0.55579
		0.26186			0.40071	0.66391	0.90223	0.64553		0.45188	3.0574	0.24845	0.71418	0.4745	1.5476	0.53396
		0.34116			0.33622	0.32059	0.67568	0.76794		0.48849	2.6086	0.26594	0.83523	0.51617	1.0935	0.82553
		0.4483			0.33622	0.63022	0.3321	0.90623		0.50572	1.8722	0.24776	2.2131	0.31633	2.0326	0.64634
		0.78117			0.45843	0.74748	0.41956	0.96368		0.60809	1.6824	0.21128	0.91873	0.38301	1.6024	0.55837
		0.33708			0.40884	0.6502	0.48186	0.48182		0.4654	0.76869	0.47141	0.44693	0.6728	1.6348	0.6213
		0.31892			0.40884	0.63917	0.49245	0.44854		0.48961	0.73514	0.25584	0.93967	0.50669	2.5734	0.6217
		0.41009			0.36814	0.62819	1.2916	0.48579		0.36551	0.49575	0.38146	0.82521	0.4024	2.4994	0.57021
		0.30458			0.36814	0.64804	1.2916	0.5038		0.34146	0.50768	0.29933	1.0496	0.35794	1.7309	0.48084
		0.34534			0.39215	1.0089	0.74548	0.71229		0.29075	1.1655	0.212	0.79734	0.73564	2.4548	0.76082
		0.35739			0.29909	1.0781	0.59528	0.40576		0.35564	0.80526	0.28408	1.1385	0.38063	0.79993	0.52133
		0.36441			0.29026	1.3506	1.0945	0.49036		0.30768	0.81075	0.34485	1.7216	0.58868	0.6278	0.56376
		0.31756			0.29817	0.91819	0.65956	0.38369		0.55757	0.70795	0.23505	0.54877	0.3805	0.81282	0.56376
		0.22811			0.25516	0.85784	0.52958	0.48119		0.55051	1.1913	0.56375	1.4545	0.671	0.6966	0.35033
		0.37174			0.46209	0.93297	0.59389	0.60749		0.55051	0.60211	0.59085	1.3601	0.56664	1.6951	0.535
		0.35806			0.38489	1.9066	0.53525	0.65313		0.4558	0.72293	0.69153	0.7073	0.36478	1.8034	0.46826
		0.34328			0.2947	1.1	0.62003	0.61358		1.1711	0.61461	0.49208	0.90163	0.6358	0.99865	0.763
		0.31198			0.42526	0.98032	0.44613	0.55855		0.64933	0.50985	0.49208	0.61862	0.64538	1.4196	0.31966
		0.60041			0.51444	0.79017	0.70841	0.66195		0.34423	0.38906	0.36917	0.90207	0.53887	3.5996	0.72312
		0.63558			0.28292	1.2045	0.78701	0.78622		0.34423	0.38267	0.35932	0.91584	0.61844	3.0644	0.48262
		0.42183			0.40771	0.43847	0.78701	0.86692		0.32888	0.46105	0.55192	0.62245	0.54462	1.97	0.59445
		0.39196			0.40771	0.41544	0.39681	0.61511		0.70705	0.34732	0.55192	1.2561	1.444	3.551	0.61341
		0.39776			0.26922	0.68619	0.4324	0.58315		0.36993	0.75872	0.61995	0.98288	1.1472	1.0735	0.54414
		0.38822			0.34998	0.58038	0.42045	0.4779		0.47474	0.66498	0.33456	0.67598	1.3623	0.86561	0.59091
		0.38822			0.31591	0.82051	0.43573	0.48016		0.4427	0.79906	0.8252	0.67598	2.0275	2.44	0.37565
		0.24778			0.41052	1.0331	0.43573	0.80817		0.43316	0.62245	0.87188	0.55849	0.48624	1.3002	0.45724
		0.32113			0.53937	1.4801	0.43573	0.99403		0.43316	0.54517	0.45189	0.85936	0.65314	1.4315	0.88199
		0.32258			0.25763	1.5619	0.76196	0.81		0.3879	1.7729	0.50109	1.0433	0.40351	1.1725	0.48962
		0.26356			0.4015	1.0384	0.40381	0.79423		0.41606	1.3269	0.50662	1.1845	0.34811	0.92065	0.46216
		0.26918			0.53344	0.55954	0.48307	0.63831		0.76902	0.34626	0.62899	2.0775	0.80383	1.1575	0.77089
		0.32658			0.5196	0.6406	0.68936	0.50649		0.76902	0.54227	0.58377	1.0136	0.77483	1.6063	0.31892
		0.32658			0.62086	0.82624	0.52009	0.61469		0.76902	0.57068	0.50602	0.91593	0.83904	1.4552	0.57727
		0.36522			0.81097	0.52506	0.57734	0.60205		0.45042	0.70102	0.48723	0.68781	0.7954	0.81866	0.45713
		0.31766			0.35445	0.52608	0.57734	0.58952		0.58381	0.29159	0.38586	1.0886	0.76984	2.2164	0.43797
		0.31388			0.45201	0.55808	0.30881	0.47701		0.45928	0.94784	0.37042	0.78857	0.80874	1.6004	0.86946
		0.3966			0.82834	0.34051	0.21711	0.47701		0.43633	1.2669	0.35074	0.99474	0.62669	1.4081	0.86946
		0.4229			0.67507	0.55141	0.56432	0.3929		1.0895	0.70074	0.32283	0.77638	0.91396	1.4081	0.60212
		0.31072			0.75323	0.81003	1.4083	0.46558		0.78161	0.58548	0.86768	1.592	0.55184	0.87289	0.83316
		0.67095			0.41837	0.67604	1.2279	0.59801		0.73798	0.82112	0.8718	0.55498	0.72946	2.1771	0.61994
		0.72986			0.72661	0.4954	0.42175	0.62614		0.75332	0.53865	0.72095	0.81598	0.48949	0.98593	0.83227
		0.43969			0.67083	0.54575	0.58481	0.62614		0.72392	0.51893	0.34453	2.5559	0.85926	1.1769	0.78283
		0.60763			0.59358	0.84945	1.0906	0.40636		0.87411	0.93416	0.79832	0.77786	0.76355	0.93378	0.65463
		0.25566			0.35121	0.87039	0.55791	0.45302		0.94483	0.60672	0.29788	0.6589	0.40276	0.93378	0.75885
		0.26724			0.41269	0.90325	0.54732	0.4975		0.94483	0.43432	0.64287	0.74502	0.9214	0.96642	0.43401
		0.26893			0.49224	0.38409	0.65193	0.53815		0.78207	0.42695	0.58021	0.94726	0.49499	1.1717	0.32237
		0.81246			0.6826	0.72833	0.35676	0.49273		0.51994	0.59054	0.66339	0.66865	0.51384	1.0937	0.37257
		0.54627			0.60398	0.80893	0.28195	1.1947		0.59467	0.52383	0.58701	1.117	0.63883	0.88347	0.59277
		0.23896			0.56413	0.58946	0.45466	0.59642		0.37904	0.35467	0.28781	0.88115	0.41653	0.89763	0.24314
		0.32294			0.53846	1.2038	0.43543	0.41553		0.46435	0.58185	0.31044	1.1931	0.64828	1.7236	0.41922
		0.311			0.52149	1.1008	0.4533	0.44813		0.46435	0.36777	0.72282	0.7726	0.92954	0.99909	0.41281
		0.44807			0.64745	0.84497	0.64688	0.36753		0.33845	0.37776	0.40115	1.0736	0.53691	0.78475	0.41281
		0.37542			0.62514	0.74166	0.73324	0.5782		0.44656	0.43794	0.40115	0.85133	0.2861	0.91312	0.45566
		0.29827			0.57983	1.4485	0.60486	0.5782		0.32592	0.40881	0.54193	1.2057	0.31639	1.5039	0.42834
		0.29827			0.55791	0.36559	0.50068	0.50563		0.28968	0.3943	0.66156	0.52188	0.7809	0.9756	0.42834
		0.3213			0.75234	0.27483	0.66807	0.35805		0.64826	0.51965	0.23762	0.83544	0.40599	0.99929	0.40533
		0.35144			0.55899	0.62462	0.30536	0.70631		0.57551	0.40315	0.35297	0.72878	0.35281	0.5083	0.34319
		0.58754			0.34523	0.65835	1.0552	0.70631		0.4954	0.54577	0.84087	0.84411	0.33978	0.29946	0.28856
		0.39802			0.28504	0.4551	0.68177	0.66304		0.70134	0.38751	0.66213	1.0686	0.3683	0.37284	0.37291
		0.19146			0.76422	0.58939	0.42301	0.57572		1.273	0.46069	0.55644	0.59586	0.43398	0.74957	0.2741
		0.29947			0.96267	0.96647	0.40374	0.64162		1.0966	0.2808	0.34706	0.50068	0.15341	0.68962	0.35729
		0.33219			0.41927	0.47052	0.43189	0.98285		0.79608	0.49664	0.51283	1.2566	0.61833	1.0579	0.35729
		0.19089			0.55706	0.48875	0.77134	0.78407		0.42275	0.82295	0.60014	1.3098	1.2201	0.77556	0.36446
		0.19638			0.52308	0.28791	0.87925	0.78407		0.42466	1.1596	0.41156	0.78078	0.60055	0.88266	0.46182
		0.32703			0.58641	0.32192	0.41796	0.9092		0.64705	0.43919	0.56879	0.56898	0.74293	0.74935	0.36469
		0.31132			0.36977	0.41942	0.47832	0.39021		0.78125	0.39441	0.60131	0.83778	0.76864	1.0073	0.31505
		0.35155			0.36977	1.0875	0.62106	0.6007		0.78125	0.29133	0.44189	1.1469	0.6819	0.42682	0.59233
		0.25963			0.48187	1.0897	0.55574	0.73865		0.75948	0.34413	0.57525	0.86416	0.70294	0.28547	0.40741
		0.17613			0.53671	1.1558	0.45806	0.73865		0.37733	0.72536	0.3467	0.69858	1.2495	0.22859	0.37647
		0.17613			0.24554	1.0239	0.33928	0.59919		0.38813	0.33047	0.37316	1.2094	0.59411	1.7922	0.37311
		0.33004			0.21391	0.74789	0.62658	0.43811		0.47772	0.22242	0.36999	0.97748	0.45164	1.2515	0.41972
		0.37716			0.4636	0.77146	1.0346	0.45483		0.4883	0.4624	0.48804	0.61013	0.72775	2.5826	0.51961
		0.34139			0.5475	0.59124	0.52405	0.59548		0.55959	0.75832	0.78025	1.2407	0.60876	0.45566	0.35438
		0.31302			0.54708	0.91152	0.55942	0.50888		0.64242	0.37943	0.34743	0.80453	0.74593	1.2535	0.49952
		0.31302			0.5568	1.0148	0.84173	0.50888		0.30632	0.2911	0.36826	0.64997	0.45698	0.90949	0.33034
		0.58975			0.35646	0.82832	0.42915	0.6198		0.68731	0.31579	0.45965	0.85354	0.42914	1.191	0.51009
		0.48505			0.50682	0.79183	0.42915	0.40549		0.57666	0.6707	0.76593	1.0626	0.70313	1.191	0.62779
		0.45247			0.20786	0.72823	0.39023	0.55859		0.6051	0.76017	0.32041	1.1247	0.54611	3.2534	0.32619
		0.32507			0.49942	0.98462	0.42499	0.66618		0.48708	0.34377	0.41543	1.1411	0.58072	2.1629	0.3546
		0.21524			0.7988	0.89652	0.34087	0.89029		0.47228	0.22975	0.44047	1.2104	0.84519	1.3481	0.28519
		0.28752			0.60807	0.47623	0.38948	0.47585		0.29331	0.56119	0.55784	0.57818	0.58968	1.4508	0.25957
		0.39047			0.87163	1.2018	0.39687	0.36666		0.35641	0.38293	0.39602	0.67918	1.2455	1.7831	0.39713
		0.39364			0.54213	0.66468	0.4084	0.36666		0.77859	0.4617	0.38889	0.74351	0.62801	3.622	0.29774
		0.49505			0.72942	0.4949	0.27576	0.64652		1.1361	0.61818	0.38988	1.2667	0.71489	1.0313	0.36513
		0.27274			0.51078	0.86567	0.65905	0.64652		0.36299	1.0115	0.40567	1.4388	0.65044	2.9278	0.294
		0.46102			0.48431	0.67152	0.69941	0.44988		0.7304	0.34094	0.4076	1.0594	0.59543	3.3343	0.27894
		0.2297			0.6131	0.56853	0.35792	0.62665		0.50896	0.43447	0.30964	0.89333	0.70362	1.0898	0.48671
		0.47901			0.47184	0.73962	0.39798	0.58163		0.33425	0.86425	0.41417	0.92316	0.7472	1.1312	0.30394
		0.32935			0.50116	0.37241	0.45136	0.77219		1.1954	0.4708	0.55907	0.93429	0.57655	1.3905	1.3311
		0.21063			0.43809	0.38914	0.33834	0.74735		0.36597	0.56221	0.55907	1.2048	0.86521	1.8544	0.365
		0.26902			0.31103	0.37128	0.4413	0.56872		0.23327	1.0343	0.40178	1.2727	0.70606	2.3309	0.43719
		0.34299			0.5488	0.44758	0.54533	0.84307		0.32492	1.1092	0.3262	0.82762	0.68583	1.597	0.35323
		0.28509			0.25438	0.39904	0.40888	0.84307		0.45968	0.3116	0.29401	1.3956	0.44953	2.179	0.35203
		0.27956			0.7024	0.37849	0.39817	0.87668		0.28036	0.34208	0.50081	0.84327	0.5117	1.6216	0.44036
		0.21341			0.40935	0.77541	0.45097	0.64747		0.26729	0.63074	0.56224	0.98354	0.61704	1.464	0.28974
		0.39539			0.37046	0.32221	0.39468	0.55084		0.14296	0.2602	0.89413	0.72693	0.73966	0.94299	0.58829
		0.33675			0.67524	0.19762	0.47618	0.65053		0.27301	0.28434	0.77482	0.87375	0.68178	1.4196	0.82544
		0.49821			0.60402	0.37379	0.40261	0.6129		0.32459	0.43635	0.58607	1.4032	0.83157	2.4016	0.60238
		0.33645			0.62251	0.21038	0.42077	0.72844		0.61909	0.44753	0.32915	0.92623	0.81266	1.0285	0.49129
		0.47143			0.46095	0.21588	0.49769	0.43629		0.8022	0.40446	0.58607	0.76344	0.7929	1.7499	0.35944
		0.47064			0.36442	0.39905	0.49769	0.53597		0.50887	0.38404	0.38494	0.54018	1.1848	1.5865	0.99621
		0.47849			0.39657	0.27395	0.89171	0.41169		0.38924	0.35016	0.80749	1.0313	0.58425	0.97768	1.3336
		0.36794			0.50649	0.23399	0.45777	0.84099		0.66351	0.38535	0.86914	0.86428	0.65859	2.4209	0.471
		0.2363			0.39532	0.27362	0.46618	0.84099		0.47125	0.68255	0.70784	1.0833	0.65466	1.6571	0.50608
		0.27573			0.68912	0.43779	0.64013	0.78435		0.50665	0.37631	0.73058	1.3188	0.4253	1.3811	0.30568
		0.25134			0.45108	0.50603	0.70038	0.73041		0.52573	0.28503	0.73945	0.61924	0.85935	1.6892	0.55837
		0.62542			0.68211	0.24949	0.67845	0.63438		0.44415	0.37467	0.47034	0.8699	0.92806	1.1535	0.68467
		0.75966			0.63699	0.39174	0.56499	0.68349		0.75613	0.32126	0.42576	1.2092	0.92806	1.3464	0.72693
		0.33361			0.42722	0.35876	1.174	0.68349		1.0931	0.62844	0.42115	0.81636	0.5136	1.1535	0.68301
		0.65627			0.76166	0.48894	0.73117	0.59689		0.39503	0.35379	0.437	0.51275	0.93475	1.9182	0.38995
		0.57817			0.27791	0.41944	0.66895	0.57475		0.38896	0.81644	0.35739	1.6493	0.88121	1.9535	0.72614
		0.29746			0.59769	0.60239	0.56492	0.51875		0.63556	0.79066	0.24012	1.6058	0.81253	1.5121	0.85278
		0.29887			0.36422	0.50893	0.59227	0.42274		1.1873	0.32856	0.27727	0.95142	0.61821	1.7299	0.79017
		0.44732			0.4181	0.44328	0.56979	0.55475		1.2374	0.30237	0.27938	1.122	1.2018	1.7582	1.365
		0.41294			1.0599	0.45532	0.93618	0.57845		0.66414	0.98496	0.6265	0.78625	1.2761	2.5028	2.3997
		0.34279			1.0599	0.51423	0.41758	0.72573		0.73041	0.43187	0.65779	1.416	0.88758	0.72167	0.43515
		0.32309			0.55559	0.36691	0.32286	0.76549		0.57331	0.45463	0.33965	1.1239	0.91691	0.50664	0.63392
		0.40476			0.66404	0.42963	0.52743	0.46313		0.51788	0.88998	0.34056	1.1793	1.2296	1.0384	0.47364
		0.40961			0.44013	0.43281	0.62922	0.52427		0.58633	0.25654	0.42521	0.76941	2.0531	0.94405	0.44589
		0.64088			0.32409	0.36162	0.70641	0.87113		0.89064	0.47728	0.43855	0.85768	2.5832	2.2251	0.52703
		0.29526			0.44233	0.66159	0.61804	0.58536		0.81671	0.30015	0.48891	1.1748	0.9265	1.251	0.3507
		0.4282			0.33496	0.35939	0.62302	0.52979		0.54179	0.36297	0.39595	0.76882	1.4887	1.5592	0.27491
		0.33574			0.53235	0.35939	0.43263	0.62715		0.69383	0.33992	0.42483	1.0976	0.84444	3.8407	0.56616
		0.33025			0.40789	0.30426	0.51581	0.57624		0.36221	0.81185	0.52075	1.1149	0.70048	2.9553	0.60407
		0.72583			0.80427	0.38476	0.42974	0.75027		0.76635	0.89257	0.55603	0.75337	0.61404	1.6122	0.40339
		0.25936			0.78779	0.4895	0.34071	0.74742		0.31321	0.49938	0.38078	1.0545	1.0655	1.6901	0.38279
		0.43286			0.59523	0.70868	1.0684	0.53483		0.78643	0.74437	0.4365	0.53454	0.78856	1.8684	1.7178
		0.32794			0.43634	0.31914	0.6299	0.91576		0.32241	0.85781	0.26607	0.88712	0.79101	1.1998	0.61052
		0.25137			0.54019	0.29903	0.79406	0.7775		0.64149	0.68059	0.21686	0.76349	1.6133	0.71736	0.61545
		0.19838			0.67363	0.29903	0.78372	0.7775		0.53954	1.0057	0.24046	0.92624	1.4896	0.77283	0.62555
		0.27907			0.40963	0.2803	0.6031	1.0137		0.37455	1.1016	0.42687	1.1608	0.64475	1.9099	2.6077
		0.24696			0.46109	0.36198	0.6031	0.82436		0.78842	0.98972	0.31112	0.80776	0.71175	1.2442	0.58851
		0.16779			0.34306	0.45232	0.47815	0.65693		0.71166	0.70998	0.3891	1.905	0.77864	0.47756	0.66204
		0.19914			0.67456	0.42741	0.72774	0.65536		0.34015	0.56591	0.41179	1.0869	0.86723	1.3573	1.143
		0.19914			0.49372	0.41065	0.70257	0.62207		0.59749	0.26496	0.3803	0.89227	0.84005	0.90448	0.41293
		0.18121			0.3409	0.46536	0.82371	0.60225		0.76422	0.58259	0.35042	0.59392	0.57903	1.1943	0.43376
		0.2245			0.42745	0.27608	0.7266	0.64161		0.74707	0.44502	0.31789	0.66868	0.73055	1.1889	0.65399
		0.2262			0.64157	0.63921	0.58063	0.50424		0.79353	0.37688	0.3805	1.2353	0.8009	1.2403	0.70885
		0.15341			0.47374	0.49175	0.49386	0.63744		0.81341	0.3661	0.44838	1.1706	0.97653	1.0607	0.44543
		0.15503			0.42093	0.34902	0.71283	0.60566		0.67748	0.23681	0.44769	1.3386	0.6273	1.1746	0.42892
		0.18288			0.31861	0.74233	0.79725	0.7183		0.96398	0.87897	0.33063	0.72685	0.60869	3.2065	0.56039
		0.12704			0.63131	0.63498	0.61454	0.76247		1.1498	0.74697	0.53387	0.72685	1.1219	1.3178	0.57929
		0.12067			0.63131	0.47919	0.54557	0.57374		1.1498	0.34674	0.34718	1.2323	0.7158	1.4911	0.65873
		0.35907			0.24486	0.40499	0.57939	0.44655		0.46844	0.35314	0.60313	0.81962	0.68957	1.4911	0.36729
		0.38168			0.33034	0.30785	0.69127	0.41099		0.87075	0.28054	0.34124	0.81962	0.96211	0.79533	0.95135
		0.21407			0.48558	0.87531	1.0589	0.65866		0.87075	0.86973	0.41113	1.0248	1.0798	1.9277	0.61473
		0.281			0.20622	0.333	0.41995	0.60034		0.54209	0.29397	0.31217	1.2159	0.78418	1.591	0.46081
		0.20191			0.88522	0.44341	0.50398	0.46863		0.60964	0.75977	0.41162	0.63426	1.6678	1.7377	0.50274
		0.25588			0.49017	0.58429	0.63201	0.57996		0.37218	0.74306	0.28879	0.75229	1.4228	0.82582	0.36596
		0.25588			0.3688	0.63847	0.74995	0.68716		0.40648	0.33639	0.51782	0.7517	1.3224	0.99951	0.47149
		0.29537			0.3688	0.58436	0.69676	0.68716		0.68514	0.35744	0.33726	0.70996	1.3224	1.5453	0.36596
		0.26497			0.46492	0.21619	0.7516	0.4736		0.62162	0.28644	0.58745	0.58085	1.6162	1.6694	0.4334
		0.42466			0.4865	0.4458	0.61929	0.43811		0.51586	0.39276	0.63758	0.77976	1.2168	1.3105	0.47149
		0.21421			0.37649	0.49847	0.41219	0.63097		0.34765	0.6441	0.32471	0.95844	1.0218	2.3814	0.39125
		0.25717			0.24764	0.49847	0.65347	0.48435		0.75501	0.37309	0.34616	1.7582	0.93314	1.1585	0.36596
		0.2592			0.41286	0.79877	0.62271	0.43182		0.69404	0.20871	0.3276	1.1651	0.91294	1.3823	0.4334
		0.26026			0.44727	0.27335	0.34803	0.75092		0.48572	0.48052	0.31676	1.0171	1.1412	0.68442	0.47149
		0.55157			0.36511	0.52332	0.395	0.67553		0.76906	0.52893	0.4252	1.1617	1.1175	0.69219	0.39125
		0.47954			0.61233	0.36115	0.27807	0.47338		0.51465	0.27682	0.39396	0.93826	1.2141	0.53682	0.36596
		0.452			0.52607	0.44351	0.71445	0.66446		0.7834	0.13853	0.33192	0.79462	2.1788	0.87244	0.4334
		0.23126			0.58997	0.39738	0.39282	0.66446		0.32333	0.2549	0.28404	1.0512	0.76222	0.53969	0.47149
		0.42058			0.58997	0.4068	0.8203	0.46372		0.78611	0.25397	0.44493	0.62678	1.3287	0.29988	0.39125
		0.29508			0.4298	0.34585	0.35564	0.37921		0.82114	0.438	0.39959	1.5207	1.3379	0.32554	0.36596
		0.27626			0.68559	0.43585	0.83987	0.47346		0.86385	0.24706	0.35588	1.474	1.1576	0.26463	0.4334
		0.27961			0.49375	0.31533	0.79868	0.53298		1.0574	0.44901	0.38349	0.78144	1.2181	0.44276	0.47149
		0.46813			0.77263	0.4564	0.45795	0.76767		0.69459	0.56745	0.56438	0.78383	0.55957	0.30025	0.22017
		0.48144			0.49067	0.40539	0.38843	0.44209		0.85721	1.8953	0.27087	0.88174	0.67344	0.60496	0.51973
		0.26945			0.30935	0.40539	0.45576	0.6615		0.60312	0.74935	0.23762	0.4424	0.97604	0.7113	0.65046
		0.30877			0.7461	0.40764	0.73089	0.67869		0.37974	0.63647	0.88547	0.5597	1.2166	0.39899	0.34864
		0.30449			0.54545	0.32779	0.70728	0.65163		0.60361	1.2796	0.47887	0.49827	1.2839	0.50861	0.37004
		0.24672			0.3904	0.37198	0.38206	0.47635		0.48597	0.64651	0.45335	1.0921	0.88328	1.3337	0.71111
		0.22201			0.42076	0.59248	1.1614	0.59818		0.52622	0.72501	0.77396	0.8543	0.86866	1.1092	0.38817
		0.3107			0.41492	0.42287	0.65891	0.52712		0.65512	0.63762	0.59835	0.89117	0.86866	0.22876	0.54163
		0.29146			0.41979	0.43464	0.42896	0.57727		0.72065	0.6612	0.59835	0.52922	0.89148	0.26567	0.54163
		0.26148			0.62735	0.41028	1.3433	0.5682		0.38796	0.55332	0.4414	1.3591	0.71983	1.4959	0.35215
		0.39587			0.68091	0.42358	0.50909	0.90556		0.58087	1.9749	0.58409	1.6423	0.85027	1.3491	0.47386
		0.34941			0.66806	0.53138	0.52344	0.54814		0.6306	0.50481	0.29776	0.66551	0.85796	0.95729	0.68455
		0.30707			0.48046	0.3656	0.53225	0.54814		0.30051	0.58723	0.69774	0.92883	0.77419	0.56456	0.81706
		0.51778			0.24523	0.35191	0.89713	0.65616		0.24319	0.54773	0.48799	0.61357	0.8735	1.0732	0.72014
		0.65679			0.23802	0.3284	0.52103	0.4454		0.24	0.40203	0.35618	0.68957	0.62545	1.0159	0.68514
		0.56447			0.30161	0.42299	0.88371	0.59703		0.29682	0.49015	0.37047	0.79706	0.82505	1.0159	0.39449
		0.33545			0.71103	0.44075	0.56426	0.74579		0.47152	0.46231	0.32911	1.6566	1.0947	1.2189	0.37883
		0.64427			0.30277	0.37766	1.6238	0.54375		0.52331	0.40199	0.72103	1.0034	0.76644	2.0033	0.70296
		0.3009			0.4061	0.39902	0.68322	0.66729		0.56076	0.49295	0.3062	0.75049	1.0181	2.1243	0.49006
		0.27875			0.4249	0.47274	0.35357	0.41174		0.49627	0.92233	0.60534	0.37637	0.51685	1.3333	0.68831
		0.29648			0.53467	0.28536	0.46643	0.7291		0.38182	0.78405	0.6295	1.1441	0.75516	3.0425	0.55313
		0.24316			0.41247	0.3919	0.63254	0.58518		0.44989	0.54607	0.45466	1.0816	0.62433	1.4954	0.82861
		0.44334			0.45944	0.74879	0.59108	0.42315		0.44989	0.6063	0.33842	0.77552	0.64742	1.9731	1.0219
		0.35038			0.71199	0.46349	0.55744	0.59558		0.43681	0.44011	0.37215	0.80811	0.49342	1.5676	0.43761
		0.33367			0.56339	0.35664	0.60915	0.68992		0.24139	0.97977	0.36062	1.5126	1.1517	1.5292	0.48586
		0.24061			0.54598	0.70563	0.36079	0.69715		0.41621	0.8138	0.39352	0.98386	1.1851	2.7919	0.61469
		0.42042			0.29118	0.51567	1.2894	0.49922		0.26907	0.67304	0.28329	0.8306	1.1834	1.1709	0.34534
		0.24536			0.42341	0.60984	0.73209	0.47067		0.32535	0.57605	0.3343	1.1464	0.69139	1.4594	0.54423
		0.49477			0.56465	1.0408	0.78451	0.2891		0.66548	0.7028	0.9888	0.37835	0.69139	1.668	0.68004
		0.45522			0.29338	0.74428	0.35844	0.49496		0.59645	1.5103	0.45917	0.55023	0.53464	1.1598	0.45901
		0.43426			0.55356	0.4114	0.76675	0.23448		0.60814	0.60755	0.41479	0.51824	0.39077	1.8675	0.24826
		0.30827			0.67606	0.41632	0.65154	0.39646		0.5172	0.50423	0.60263	0.8011	0.35874	1.6495	0.36459
		0.81364			0.34303	0.66705	0.5317	0.29742		0.51906	0.30814	0.42427	0.78398	0.89255	1.5847	0.77091
		0.2697			0.76699	0.66705	0.33901	0.32169		0.43251	0.56617	0.45221	0.81734	0.72799	1.0818	0.37837
		0.1845			0.63161	0.66643	0.47007	0.29441		0.42928	0.49761	0.47643	0.62887	0.48137	0.84967	0.43207
		0.22215			0.68468	0.62619	0.57125	0.44187		0.48713	0.50241	0.44736	0.68117	0.45549	0.73062	0.39041
		0.39492			0.51587	0.38598	1.2196	0.52283		0.40757	0.85133	0.40971	0.92581	0.49673	0.99125	0.38726
		0.34911			0.38023	0.44942	0.35294	0.56666		0.64585	0.36751	0.34896	0.5602	0.89778	1.6228	0.40583
		0.24363			0.38591	0.54731	0.5126	0.35148		0.65431	0.46788	0.38061	0.74619	0.42188	1.9615	0.47871
		0.24363			0.57194	0.56013	0.59747	0.40035		0.35396	1.1322	0.41739	0.73561	0.42706	1.4279	0.54129
		0.25653			0.45755	0.4291	0.56861	0.42234		0.65939	1.1169	0.38588	1.1001	0.66885	1.0944	0.52013
		0.24631			0.22141	0.43225	0.71489	0.34782		0.31975	1.1565	0.44651	1.2618	0.51201	1.4325	0.4526
		0.68101			0.47362	0.28898	0.36571	0.33196		0.64854	0.98092	0.65004	1.1669	0.95304	1.4325	0.47797
		0.19001			0.45842	0.40009	0.55475	0.59772		0.67207	1.3121	0.45416	0.97566	0.53267	1.2765	0.38876
		0.3423			0.45989	0.43304	0.85462	0.44115		0.82305	1.1879	0.45223	1.0232	1.5324	1.5239	0.38925
		0.24334			0.47618	0.63277	0.58362	0.38345		1.0138	0.96515	0.61684	0.4667	0.91704	1.222	0.59517
		0.88828			0.5813	0.86178	0.76945	1.1056		0.54907	1.181	0.29388	0.90693	0.9314	0.94102	0.49466
		0.43906			0.4426	0.91112	0.70573	0.77755		0.58738	1.4447	0.37087	0.71388	0.78551	1.036	0.55562
		0.18535			0.45243	0.91112	0.49904	0.46541		0.46812	0.68769	0.4331	1.003	0.39752	1.1933	0.5415
		0.33106			0.50086	0.5332	0.57206	0.46541		0.70813	1.3501	0.4331	0.87907	0.45329	1.1933	0.40946
		0.46436			0.27772	0.51529	0.42178	0.48419		0.67657	0.29575	0.28015	1.6436	0.39153	0.99033	0.75711
		0.35433			0.57115	0.45921	0.51186	0.32602		0.29316	1.0637	0.33148	0.93489	0.52727	1.2618	0.86701
		0.31586			0.61773	0.37694	0.58955	0.30835		0.3277	0.82338	0.504	0.9536	0.755	1.0714	0.56269
		0.32154			0.8332	0.86737	0.57328	0.64517		0.53065	0.50763	0.54154	2.9363	0.91838	1.6663	0.38564
		0.71352			0.54416	0.66105	0.49835	0.64517		0.44359	0.55861	0.31022	2.5419	0.61792	1.7329	0.46093
		0.44534			0.26543	0.45334	1.2374	0.49525		0.61721	0.73336	0.39463	1.5232	0.67026	0.73239	0.38084
		0.32371			0.41805	0.52398	0.59602	0.33979		0.53982	0.47778	0.59812	0.96999	0.72474	0.93428	0.42536
		0.42033			0.56194	0.52174	1.0171	0.31091		0.47215	0.76198	0.56338	2.0108	0.85531	1.2904	0.36645
		0.46408			0.31242	1.2152	1.1298	0.52406		0.39295	0.50182	0.35735	1.1321	0.61662	1.0338	0.38054
		0.28537			0.4453	0.85233	0.33155	0.59212		0.54083	0.30516	0.54119	1.1852	0.67733	1.3991	0.45524
		0.25181			0.58933	0.59814	0.58414	0.46421		0.53866	0.82584	0.27544	1.111	0.67733	0.68907	0.32198
		0.25181			0.41051	0.45257	0.80562	0.38934		0.52301	0.50819	0.26421	0.9136	0.58956	1.0544	0.3937
		0.25181			0.65867	0.61173	0.63673	0.50144		0.72916	1.144	0.27544	1.0187	0.58023	0.97509	0.67269
		0.3455			0.78746	0.58497	0.53343	0.53492		0.72949	0.66177	0.58771	0.62327	0.52446	0.95878	0.53114
		0.35807			0.35815	0.73401	0.62911	0.55672		0.87653	0.66177	0.43276	0.70057	0.46543	1.1086	0.53518
		0.39923			0.47394	0.73669	1.2491	0.48714		0.58993	0.90022	0.37636	0.55348	0.46487	1.3696	0.75141
		0.38954			0.60004	0.38508	1.0944	0.40947		0.2547	1.0632	0.30685	0.98233	0.87587	0.89236	0.54322
		0.34371			0.53374	0.43126	0.71281	0.40703		0.3043	0.46323	0.85607	1.122	0.65245	2.4311	0.46864
		0.21451			0.43677	0.41645	0.49352	0.40703		0.58644	0.62978	0.74185	0.73851	0.39264	1.6807	0.30775
		0.36829			0.61756	0.33686	1.0828	0.47592		0.64547	1.0974	0.42743	0.78885	0.81047	1.2144	0.45785
		0.45516			0.73929	0.29458	0.56443	0.36538		0.48148	0.93856	0.42595	0.68222	0.5334	1.4995	0.50616
		0.54968			0.88603	0.55037	0.5603	0.41412		0.61377	0.57321	0.51111	0.76893	0.67658	2.7508	0.36271
		0.13816			0.36948	0.60176	1.1705	0.6874		0.44522	0.97597	0.36181	0.99369	0.91179	0.99744	0.38276
		0.53814			0.60876	0.37688	0.93941	0.66546		0.74587	0.4955	0.20026	0.76169	0.83362	2.7575	0.40605
		0.23677			0.45418	0.37484	0.88406	0.48225		0.7421	0.75562	0.28113	0.80819	0.91433	1.1133	0.32573
		0.3288			0.63139	0.34741	0.47325	0.37541		0.27577	0.40352	0.45392	0.6515	0.87563	1.011	0.34098
		0.28847			0.68972	0.44597	0.69958	0.29164		1.2464	0.53188	0.44979	0.99542	0.65636	1.4648	0.40081
		0.25021			0.49552	0.37441	0.53059	0.35791		0.38374	0.38881	0.51848	1.5309	0.31712	0.81678	0.5528
		0.22842			0.40343	0.68177	0.95543	0.25002		0.29077	0.93403	0.23118	0.54561	0.54724	1.7128	0.28234
		0.32343			0.54007	0.61139	0.39391	0.34937		0.79063	1.5642	0.56777	1.3789	0.50378	1.7128	0.42708
		0.36122			0.67444	0.77734	0.4934	0.32816		0.84826	0.33309	0.514	1.1275	0.4519	1.9611	0.36392
		0.29581			0.59395	0.44288	0.67525	0.44687		0.77201	0.70565	0.46429	0.93695	0.86071	0.82692	0.32316
		0.32143			0.56349	0.4354	0.39617	0.94625		0.73304	1.005	0.40763	0.95333	0.81339	1.1479	0.4092
		0.32147			0.31199	0.40389	0.71113	0.69797		0.64517	0.89304	0.22837	0.93508	0.48934	1.2242	0.61183
		0.32147			0.3638	0.29561	1.4078	0.42773		0.80344	0.46103	0.2568	0.71419	0.61342	1.3289	0.67846
		0.29501			0.43036	0.37758	0.54639	0.43161		0.47431	0.52172	0.26637	1.0354	0.62849	1.4578	0.55963
		0.24884			0.42314	0.428	0.97228	0.35144		0.36429	1.3478	0.25207	0.81167	1.9348	1.5978	0.34588
		0.30738			0.21745	0.51647	0.62468	0.40847		0.65228	0.86322	0.24297	0.52634	1.6577	1.3712	0.5801
		0.30291			0.66428	0.81117	0.67399	0.40943		0.58026	0.73542	0.42444	0.71055	1.1028	1.1744	0.49424
		0.28637			0.34382	0.82882	0.32421	0.32454		0.52204	0.45154	0.42444	0.80486	0.90557	1.4333	0.41826
		0.3566			0.33934	0.47901	0.27317	0.96617		0.53634	0.52998	0.37055	0.86639	0.68713	1.1601	0.64817
		0.33392			0.45504	0.30747	0.38402	0.79478		0.89162	1.1667	0.2618	0.34262	0.83412	1.1601	0.53731
		0.39996			0.74799	0.24902	0.32353	0.56657		0.31725	0.95431	0.33851	0.79532	1.2857	0.71691	0.61854
		0.27316			0.31872	0.28749	0.44053	0.59429		1.2864	0.7238	0.25347	0.84583	0.46465	2.5584	0.45359
		0.19358			0.68835	0.75429	0.44064	0.51515		0.389	1.0156	0.50693	1.544	0.82698	1.4309	0.4104
		0.25716			0.54935	0.47626	0.44064	0.44356		0.18927	1.1921	0.47142	0.81768	0.62596	1.0228	0.44138
		0.25842			0.37713	0.33791	0.23521	0.91177		0.43098	0.77091	0.73538	0.80051	0.62596	1.3115	0.44017
		0.55251			0.89202	0.45838	0.71713	0.67091		0.26871	0.39194	0.34674	1.3002	0.74491	1.462	0.34686
		0.50684			0.4318	0.33072	0.47684	0.8456		0.5703	0.52051	0.27792	0.85939	0.97389	1.3177	0.37267
		0.32341			0.34214	0.40437	0.77234	0.45725		1.0312	0.50907	0.46198	1.2743	0.84804	0.78621	0.511
		0.25121			0.38212	1.0747	0.71777	0.50685		0.32088	0.51635	0.34196	0.83453	1.1186	1.0472	0.45443
		0.41581			0.41171	0.29345	0.36096	0.67752		0.72241	0.52485	0.3288	0.77929	0.95741	3.0321	0.4939
		0.70855			0.42125	0.34039	0.31667	1.3228		0.53562	0.78722	0.37247	0.81104	0.74655	2.6461	0.66241
		0.56831			0.49217	0.45953	0.32568	0.52808		0.6622	0.50394	0.28832	0.79225	0.54645	2.1586	0.46507
		0.42058			0.49952	0.5166	0.49353	0.58461		0.55119	0.51995	0.42803	0.94557	0.72131	1.3624	0.49112
		0.50485			0.60429	0.29495	0.50816	0.34265		0.85467	0.44769	0.46412	0.80799	0.74051	1.0204	0.68673
		0.39947			0.41482	0.42878	0.39487	0.80988		0.95747	0.97805	0.37778	1.0412	0.30837	1.0934	0.42548
		0.39947			0.38365	0.41596	0.38899	0.94624		0.8286	0.62983	0.56745	0.79694	0.85724	1.6791	0.41778
		0.43362			0.45562	0.39987	0.48103	0.70709		1.5483	0.99173	0.69517	0.68323	0.79295	2.3854	0.55631
		0.2186			0.38972	0.49563	0.51129	0.37622		0.39844	0.45977	0.467	1.1945	0.26626	1.0749	0.31277
		0.27338			0.59723	0.29034	0.29482	0.33158		0.31916	0.36168	0.55166	1.5613	0.51572	1.0691	0.96857
		0.27121			0.24914	0.45871	0.41759	0.27383		0.5867	0.57501	0.55166	0.98996	0.51748	1.1329	0.68235
		0.28086			0.26844	0.66984	0.37875	0.39114		0.62082	0.4181	0.53189	1.3355	0.34575	0.88694	0.38875
		0.42822			0.4582	0.30816	0.33852	0.44056		0.45976	1.1309	0.52485	0.57502	0.80483	0.99049	0.46064
		0.31029			0.70853	0.52395	0.46773	0.48484		0.67748	0.95768	0.68573	0.54918	0.32029	0.95278	0.47917
		0.38113			0.47834	0.73024	0.45521	0.43196		0.5154	0.48603	0.8075	1.0527	0.53035	1.1163	0.48757
		0.27402			0.47353	0.90352	0.45521	0.52177		0.67847	0.65669	0.94928	0.78561	0.65902	1.4399	0.64925
		0.44051			0.50974	0.87535	0.60496	0.57732		0.67847	0.96623	1.0072	1.0415	0.57408	0.44771	0.25912
		0.48577			0.33139	0.72789	0.69362	0.46461		0.97658	0.52223	0.35376	0.93481	0.64556	2.3569	0.32588
		0.33456			0.31125	0.24978	0.37789	0.87288		0.36336	0.33846	0.23567	0.87492	0.61162	1.2591	0.5803
		0.16355			0.37261	0.55402	0.47113	0.30101		0.55109	1.1055	0.78162	0.8473	0.54311	0.63719	0.394
		0.21632			0.70653	0.45224	0.56782	0.39859		0.57138	0.53488	0.35826	1.3102	0.63217	0.65631	0.41775
		0.49954			0.63846	0.71205	0.38762	0.35717		1.1867	0.63868	0.30025	1.2821	0.85306	0.45682	0.33553
		0.46988			0.65392	0.819	0.25704	0.29438		0.88247	0.76209	0.63051	1.0029	0.41036	0.46769	0.56196
		0.50496			0.37626	0.67804	0.33113	0.37		0.44357	0.39587	0.52003	1.4097	0.48853	0.80122	0.43284
		0.27649			0.42102	0.56436	1.1479	0.41456		0.32828	0.87422	0.45467	2.2649	0.51808	0.937	0.41408
		0.74502			0.31303	0.63704	0.78773	0.41456		0.66212	0.87422	0.55768	0.99285	1.226	0.69822	0.42599
		0.35956			0.4374	0.39641	0.34944	0.472		0.48789	0.6189	0.48314	0.54598	1.32	0.63976	0.45153
		0.3011			0.56936	0.36745	0.39483	0.61627		0.87122	0.67987	0.32538	0.56319	0.50607	0.72454	0.36126
		0.21711			0.38775	0.72408	0.28499	0.4795		0.69579	0.68817	0.78021	0.53203	0.28581	0.71988	0.41158
		0.33243			0.35929	1.1197	0.97683	0.4986		0.65448	0.64982	0.58671	0.53203	0.32081	0.61139	0.37067
		0.2987			0.39412	0.41334	0.42512	0.49869		0.77683	0.47354	0.51509	0.45322	0.77819	0.26864	0.5668
		0.2538			0.45363	0.42682	0.41838	0.27294		0.786	0.35751	0.7812	0.79322	0.75899	0.56781	0.53842
		0.19488			0.33329	0.34265	0.38247	0.39186		0.786	0.45318	0.45017	0.72023	0.69241	0.42673	0.53842
		0.28355			0.61425	0.49868	0.27588	0.36849		0.41283	0.64067	0.48542	0.48481	0.55456	0.80613	0.53842
		0.19262			0.28444	0.79104	0.19221	0.40702		0.41283	1.7386	0.79465	0.57252	0.78193	2.1289	0.41974
		0.41222			0.49564	0.76607	0.58941	0.37535		0.7771	0.36112	0.5016	0.65392	0.38141	1.1347	0.3443
		0.32927			0.39292	1.1354	0.35669	0.22255		0.44191	0.35974	0.69179	0.8274	0.38141	1.109	0.44016
		0.63021			0.34921	0.4548	0.79596	0.31196		0.4333	1.0636	0.6081	0.49237	0.31049	0.83668	0.44036
		0.66848			0.36277	0.66709	0.34998	0.66136		0.43269	1.1648	0.62045	0.58182	1.1722	0.73548	0.25133
		0.443			0.28527	1.6144	0.36122	0.40449		0.6403	0.55771	0.60435	0.59536	0.46105	0.73315	0.29749
		0.35586			0.43728	0.37383	0.27924	0.38368		0.4111	1.0693	0.49901	0.45811	0.48372	0.75811	0.34841
		0.26503			0.23874	0.64831	0.3945	0.82729		0.44567	0.79215	0.52313	0.45811	0.444	0.30659	0.35275
		0.29975			0.74173	0.49869	0.37163	0.37152		0.47172	0.68297	0.59904	0.50683	0.8469	0.71356	0.50112
		0.38914			0.42793	0.80637	0.36703	0.4592		0.72097	0.45418	0.39629	0.68018	0.8469	0.51417	0.41488
		0.37452			0.52517	0.70656	0.63575	0.4044		0.83482	0.32263	0.44571	0.63393	0.39452	0.82328	0.51764
		0.25421			0.52517	0.65753	0.5324	0.33258		0.39475	0.38102	0.38871	0.69124	0.48682	0.58115	0.55493
		0.24819			0.52288	0.56918	0.50292	0.30891		0.40519	0.68933	0.48941	0.78001	0.48731	1.053	0.40958
		0.38043			0.40871	0.48199	0.32642	0.57182		0.74753	0.60784	0.52343	0.8911	0.47203	0.88847	0.54322
		0.31698			0.51853	0.82436	0.39383	0.35667		1.152	0.76976	0.47389	0.50871	0.47885	0.71845	0.35677
		0.56879			0.45939	0.6377	0.33841	0.48138		0.69968	0.66937	0.55234	0.51661	0.65065	0.53831	0.41941
		0.48173			0.59105	0.56799	0.62858	0.3518		0.67952	0.66937	0.54624	0.46076	0.54982	1.0357	0.49552
		0.52252			0.53117	0.36593	0.27433	0.43229		0.46878	0.75641	0.39146	0.94047	0.50974	1.0357	0.38088
		0.67977			0.56129	0.36469	0.49154	0.47352		0.66623	0.47564	0.71358	0.78977	0.90306	0.60095	0.46835
		0.41006			0.43729	0.96286	0.35163	0.49788		0.65714	0.79271	0.46364	0.4975	0.74008	0.65077	0.40941
		0.39315			0.57789	1.073	0.39834	0.43723		0.46335	0.68592	0.28895	0.44355	0.60117	0.89736	0.62034
		0.38102			0.47016	1.3515	0.2883	0.36652		0.3791	0.9128	0.68651	0.60966	0.61552	1.024	0.62034
		0.39753			0.34108	1.5968	0.28795	0.34691		0.72408	0.66379	0.51688	0.63973	0.61552	0.48946	0.58358
		0.43884			0.41591	0.79333	0.38937	0.83157		0.65402	0.39588	0.72522	0.6896	0.58417	0.43414	0.33495
		0.30564			0.38971	0.77144	0.32401	0.90063		0.52193	0.72123	0.52913	1.4689	0.59112	0.39055	0.31594
		0.64285			0.40569	0.56507	0.41305	0.46715		0.63615	0.5275	0.53021	0.59963	0.58854	0.70912	0.3397
		0.32417			0.38548	1.0616	0.42229	0.46715		0.2995	0.36644	0.3772	0.77503	0.63111	0.57282	0.28742
		0.32947			0.3916	1.0793	0.38039	0.45045		0.66091	0.4735	0.50943	0.47915	0.6906	0.37524	0.3628
		0.42811			0.65612	0.67411	0.50838	0.40996		0.50212	0.63304	0.60386	0.47915	0.5397	0.56897	0.46015
		0.35562			0.45786	0.55559	0.46373	0.40996		0.79535	0.77975	0.30112	0.93556	0.35148	0.46916	0.58951
		0.35562			0.45786	0.77492	1.1126	0.35153		0.4315	0.34067	0.43082	0.61909	0.65016	0.98123	0.60833
		0.33885			0.17616	0.42401	1.0683	0.42252		0.26813	0.61309	0.46242	0.5561	0.82183	0.50543	0.62254
		0.31556			0.53162	0.58782	0.46294	0.32734		1.1294	0.85963	0.5519	0.95363	0.93774	0.53124	0.30336
		0.43588			0.56308	0.68713	0.98622	0.32734		0.79262	0.79703	0.60725	0.72111	0.98736	0.38771	0.41744
		0.2638			0.31901	0.63983	0.46121	0.28551		0.95301	0.79703	0.72328	0.69952	0.63261	0.2668	0.31191
		0.33891			0.50073	0.37421	0.69924	0.48135		0.7861	0.71921	0.7972	0.35227	0.51158	0.34334	0.34602
		0.25581			0.56104	0.60935	0.68126	0.47175		0.76424	0.74494	0.31269	0.41441	0.79149	0.32871	0.49392
		0.28604			0.2936	0.50225	0.34696	0.47175		0.5303	0.70956	0.42169	0.44293	0.62945	0.30441	0.49715
		0.22151			0.45591	0.64568	0.40148	0.40094		0.46133	0.87939	0.32206	0.41289	0.49251	0.41478	0.49715
		0.20288			0.40477	0.65312	0.6343	0.37124		0.56839	0.87939	0.50486	0.4486	0.42236	0.40449	0.54008
		0.58632			0.43936	0.41709	0.36509	0.39479		0.41895	0.92553	0.54566	0.37593	0.76676	0.57902	0.47131
		0.38688			0.29401	0.83721	0.52737	0.29951		0.7136	0.40756	0.354	0.43408	0.50342	0.41128	0.50098
		0.38688			0.39097	0.86047	1.4945	0.51888		0.55242	0.85175	0.30395	0.47112	1.0073	0.31981	0.39248
		0.38688			0.49349	0.50191	0.77285	0.40362		0.86326	0.73314	0.41552	0.62341	0.79377	0.44919	0.38827
		0.37535			0.75088	0.52887	1.6747	0.34206		0.44909	0.98954	0.44409	0.58608	0.65985	0.40911	0.54031
		0.31551			0.29156	0.81221	0.5698	0.41001		0.66743	0.59097	0.50402	0.37303	0.57884	0.30562	0.6813
		0.38622			0.5486	1.0561	1.0283	0.21526		0.73115	0.81157	0.4646	0.50835	0.64543	0.24871	0.34559
		0.33142			0.37429	0.76556	1.0873	0.40831		0.79477	1.2835	0.657	0.52636	0.45115	0.68716	0.24218
		0.22208			0.38937	0.70169	0.57726	0.44772		0.47961	0.47008	0.52197	0.46973	0.45586	1.0028	0.53774
		0.22726			0.41245	0.6926	0.66102	0.38606		0.46656	0.38191	0.31132	0.40417	0.68199	0.76966	0.5036
		0.2538			0.35474	0.55733	0.44045	0.41812		0.5233	0.51946	0.43367	0.5418	0.37767	0.94549	0.46567
		0.22984			0.34887	0.48368	0.76491	0.41006		0.30198	0.94272	0.67688	0.45196	0.42245	0.59881	0.62673
		0.39643			0.26208	0.58243	0.69607	1.103		0.79972	0.45085	0.68086	1.5727	0.45252	0.96537	0.59455
		0.55384			0.4794	0.3295	0.62626	0.43607		0.6229	0.53531	0.54299	0.75177	1.0595	0.76692	0.56148
		0.55384			0.45858	0.83837	0.4332	0.56622		0.64682	0.41347	0.41072	0.44293	0.82185	0.7864	0.35232
		0.3994			0.51619	0.48939	0.62952	0.4507		0.75595	0.8158	0.54299	0.54766	0.57809	0.65291	0.28471
		0.36112			0.36873	0.6129	0.93546	0.57862		0.8396	0.62713	0.41072	0.60631	0.67577	0.88743	0.79317
		0.43535			0.43032	0.45027	0.54452	0.3948		0.79447	0.58202	0.32477	0.66182	0.84427	1.011	0.79317
		0.2839			0.37313	0.38297	0.95132	0.75345		0.65324	0.69356	0.35494	0.37696	0.90084	1.3182	0.57625
		0.48651			0.28465	2.1695	0.65638	0.54897		0.65324	0.68136	0.30993	1.0035	0.72209	1.9191	0.37657
		0.37198			0.22941	0.34699	0.59003	0.46023		0.58121	0.54955	0.36213	0.95477	0.87102	1.126	0.48325
		0.42542			0.2888	0.31611	0.89684	0.51476		0.38402	0.55306	0.33243	0.88181	0.87102	1.126	0.75643
		0.31953			0.29603	0.33196	0.49139	0.35102		0.59698	1.1066	0.54431	0.30529	0.44837	0.97553	0.42161
		0.52787			0.23674	0.31101	0.82524	0.30712		0.59698	0.47422	0.37486	0.62571	0.93489	1.091	0.58859
		0.28608			0.28484	0.26695	0.79134	0.34217		1.0202	0.49338	0.35959	0.65916	0.8474	1.6803	0.37957
		0.41524			0.32839	0.84859	0.62063	0.57014		0.9363	0.57478	0.48367	0.86469	0.51439	1.8028	0.5057
		0.3515			0.32839	0.64684	0.52314	0.29274		0.8156	0.61338	0.41802	0.52698	0.82014	1.3124	0.5738
		0.3805			0.17092	0.30496	0.9231	0.36646		0.60338	0.55347	0.51077	0.51167	0.67709	1.6343	0.48209
		0.30244			0.26266	0.27743	0.92584	0.44747		0.54069	0.74875	0.33108	0.43378	0.39745	0.60082	0.86509
		0.48528			0.36372	0.47296	0.823	0.40845		0.85265	0.45812	0.3314	0.73851	0.35383	0.76844	0.44856
		0.45991			0.34697	0.39156	1.0205	0.41541		0.49282	0.42574	0.65517	0.53367	0.60017	0.67007	0.51727
		0.378			0.50609	0.46509	0.34427	0.43895		0.63671	0.78145	0.60735	0.52005	0.6869	1.4617	0.59884
		0.27394			0.22697	0.29851	1.5266	0.32908		0.46437	0.33854	0.44888	0.65354	0.89474	1.6798	0.55576
		1.1469			0.18608	0.28423	0.64873	0.39178		0.3179	0.42693	0.29492	0.43753	1.1867	1.0547	0.55576
		1.1803			0.2252	0.46564	0.43735	0.59514		0.78427	0.42951	0.55578	0.57169	1.1867	0.51105	0.55382
		0.3753			0.19444	0.48317	0.45382	0.39133		0.36328	1.232	0.40522	0.51982	1.1396	1.1062	0.78461
		0.35573			0.37637	0.42867	0.57471	0.45004		0.30316	0.48459	0.41911	0.51982	0.48305	0.68429	0.79703
		0.43522			0.25917	0.3542	0.42937	0.34222		0.70996	1.0178	0.6619	0.86139	0.72215	0.89195	0.74793
		0.56484			0.3141	0.23958	0.69936	0.4878		0.43999	0.33537	0.56222	0.54382	0.76696	0.69686	0.74793
		0.46379			0.26147	0.20292	0.77065	0.47027		0.33296	0.87793	0.21806	0.48179	0.69775	1.2427	0.81118
		0.29375			0.25504	0.37166	0.37529	0.32007		0.31332	0.5727	0.48779	0.69063	0.74425	0.80637	1.0804
		0.25798			0.30307	0.53114	0.51345	0.3475		0.51304	0.33676	0.75233	0.72749	0.86306	0.58557	0.64349
		0.18017			0.29951	0.53114	0.54833	0.52974		0.31064	1.4023	0.4022	0.55406	0.86306	0.86772	0.81033
		0.23485			0.2511	0.58322	0.59714	0.35773		0.17336	0.4388	0.41495	0.66203	0.73212	0.66002	0.37562
		0.19992			0.18269	0.58031	0.95758	0.43739		0.77016	0.91303	0.42496	0.66049	0.87849	0.70636	0.3185
		0.53119			0.19383	0.43947	0.52078	0.3245		0.49358	0.89374	0.51994	0.62876	0.80474	0.63922	0.33524
		0.31987			0.22386	0.28987	0.802	0.34321		1.1542	0.69413	0.27245	0.84439	0.84294	1.059	0.55424
		0.32554			0.29203	0.30571	0.44657	0.4899		1.0878	0.42375	0.55302	1.2634	1.0804	0.8286	0.44016
		0.29416			0.29203	0.34675	0.38755	0.28807		0.98425	1.1124	0.49072	1.2067	0.84594	0.63546	0.39889
		0.27213			0.22224	0.35095	0.87917	0.68018		0.4677	0.96184	0.21993	0.69047	0.98376	0.65514	0.61553
		0.43289			0.2153	0.43232	0.80105	0.61573		0.4594	0.94259	0.43183	0.89435	0.84349	0.74423	0.38094
		0.70575			0.38321	0.18656	0.58979	0.33794		0.74071	0.86755	0.7002	0.58622	0.53043	0.89702	0.59573
		0.41388			0.25324	0.42145	1.0224	0.42123		0.56437	0.79262	0.43628	1.2095	0.48414	0.79485	0.50412
		0.52855			0.27715	0.47065	0.66787	0.36011		0.37036	0.42428	0.68129	1.0087	0.6649	0.69762	0.47442
		0.43676			0.30951	0.2302	0.71612	0.34017		0.463	0.70983	0.32473	0.7027	0.84736	0.35897	0.53809
		0.38226			0.25964	0.28265	0.68963	0.27823		0.61696	0.66044	0.30925	1.3834	0.38963	0.93281	0.74855
		0.38226			0.30768	0.26762	0.79589	0.31994		0.84031	0.47794	0.35722	1.2428	0.89276	0.63914	0.58618
		0.45233			0.56997	0.25567	0.78743	0.62914		0.3372	0.57227	0.35524	0.72508	1.0383	0.76482	0.54781
		0.53909			0.36309	0.36523	1.5825	0.5595		1.0352	0.77525	0.30439	0.48753	0.46885	0.92139	0.48119
		0.3184			0.4978	0.33349	0.58405	0.47987		0.19228	0.86125	0.15362	0.50122	0.80969	0.58579	0.6148
		0.39639			0.26509	0.33349	0.83051	0.92107		0.31678	1.3047	0.24047	0.71765	0.79399	0.6435	1.6154
		0.35367			0.43359	0.36696	0.72906	1.035		0.36823	0.74883	0.28582	0.71765	0.86089	0.60685	0.60757
		0.30618			0.41991	0.39115	1.0326	0.49552		0.47975	1.0452	0.30171	0.68566	0.90987	0.55668	0.59749
		0.45966			0.50559	0.28545	0.36429	0.33772		0.32919	0.63686	0.53349	1.1548	0.8978	0.74791	0.71441
		0.39159			0.51239	0.35456	0.64603	0.71212		0.24753	0.63039	0.58703	0.79123	0.69747	0.51637	0.42342
		0.39076			0.36224	0.47246	0.30515	0.5068		0.29214	0.65928	0.22555	0.65661	0.81918	0.46291	0.6149
		0.33941			0.5095	0.72685	0.71724	0.49919		0.56352	1.1722	0.65099	0.77375	0.92526	0.45465	0.68305
		0.43643			0.51729	1.0268	0.67833	0.37029		0.34613	0.30902	0.65099	0.97966	0.52874	0.37388	0.7695
		0.4564			0.31084	1.1036	0.32789	0.41033		0.5667	0.53975	0.65099	0.97966	0.42074	0.80478	0.79032
		0.32238			0.34349	0.98485	0.32789	0.33668		0.81121	0.34996	0.6	0.93341	0.4663	0.43932	2.1484
		0.32366			0.67008	0.28803	0.34538	0.54916		0.56037	0.40285	0.53516	0.84898	0.5425	0.5717	2.1484
		0.26494			0.66904	0.63302	0.37881	0.58856		0.64902	0.3681	0.43369	0.42801	0.66041	0.59347	0.75534
		0.31662			0.47521	0.68118	1.1027	0.65463		1.4638	0.44238	0.24417	0.6786	0.86663	0.5948	0.77548
		0.37838			0.49983	0.68118	1.1395	0.65463		0.20015	0.36018	0.66648	0.70323	1.432	0.41807	1.0319
		0.20161			0.53062	0.37979	0.84031	0.55889		0.66588	0.27905	0.65247	0.76077	0.70122	0.40014	1.0213
		0.33521			0.41611	0.3224	0.41717	0.36598		0.34152	0.34406	0.37776	0.63368	0.38676	0.52721	0.73053
		0.33521			0.75654	0.26929	0.56331	0.36598		0.54432	0.33366	0.6012	1.2052	1.0059	0.46385	0.78755
		0.62731			0.65108	0.35912	0.77724	0.5327		0.81607	0.38792	0.68635	0.45224	0.68987	0.54731	1.725
		0.38964			0.91719	0.28519	0.50282	0.60047		0.59293	0.51539	0.68635	0.43107	1.0421	0.55282	0.50239
		0.44344			0.27254	0.34057	1.4098	0.57617		0.53733	0.49712	0.45484	0.55358	0.76266	0.71146	0.65533
		0.4934			0.83923	0.26029	0.53574	0.35659		0.4047	0.98681	0.89363	0.5651	0.47032	0.34043	0.51781
		0.30685			0.42968	0.66882	0.89548	0.39257		0.48715	0.92462	0.78523	0.46025	1.0165	0.60553	1.3809
		0.30685			0.33734	0.59411	0.42903	0.47679		0.55734	0.41867	0.68042	0.7304	1.2726	0.5093	1.125
		0.27689			0.59312	0.43381	0.92986	0.36274		0.44362	0.48601	1.058	1.3059	1.4216	0.83076	0.89169
		0.31991			0.44727	0.79235	0.58743	0.56806		0.49599	0.53483	0.4294	0.82465	0.65323	1.0638	0.69309
		0.32704			0.49389	0.55244	0.67397	0.39632		0.41663	0.45473	0.79815	0.55971	0.60435	0.83344	1.4152
		0.36284			0.4576	1.1138	1.2276	0.38308		0.56898	0.40004	1.2168	1.1174	1.0803	0.89602	1.3702
		0.40652			0.45933	0.71868	0.56164	0.40594		1.0409	0.31802	1.0584	1.2101	0.89376	0.72144	1.4871
		0.35063			0.61358	0.50816	0.60032	0.51991		0.31722	0.59064	1.2206	1.2669	0.85341	0.64158	1.2174
		0.5754			0.84951	0.40363	0.65535	0.55973		0.39137	1.1904	0.59412	0.48147	0.90065	0.87899	1.4594
		0.35884			0.38517	0.43074	0.57349	0.411		0.31513	0.38097	0.47731	1.1028	0.97759	0.82148	1.9556
		0.23332			0.40452	0.35774	0.5623	0.47519		0.38953	1.0638	0.49485	1.082	1.0068	0.84148	0.97045
		0.99367			0.65325	0.58509	0.68478	0.5086		0.33653	0.87723	0.81177	0.47243	1.143	1.054	0.65743
		0.28371			0.65325	0.87513	0.57039	0.76478		0.36087	0.73178	0.75718	0.49244	0.75096	0.3846	1.0015
		0.32675			0.49067	0.56969	0.35147	0.59113		1.1359	0.50203	0.53671	0.93933	0.95568	0.26709	0.94409
		0.40183			0.42956	0.86209	0.43515	0.58229		0.25517	0.75236	0.33371	0.78306	0.8789	0.36764	2.8603
		0.74468			0.35127	0.15488	0.59997	0.72968		0.31753	0.38448	0.58492	0.95613	0.82305	0.5148	1.8714
		0.46826			0.35127	0.46405	0.58215	0.32342		0.31753	1.1162	0.87867	1.0839	0.83717	0.6465	0.93782
		0.59551			0.4678	0.35174	0.75385	0.48274		0.53752	1.6853	0.29824	1.1085	1.1571	0.27709	1.1804
		0.59551			0.32775	0.2593	0.4764	0.43808		0.40502	0.81915	0.43472	0.50224	0.69001	0.62294	1.1804
		0.49483			0.40626	0.2593	0.76501	0.37563		0.37435	0.64973	0.40098	0.63072	0.64868	0.62294	0.51037
		0.44741			0.33044	0.23154	0.76501	0.33294		0.37435	1.2443	0.30532	0.68379	0.61025	0.65525	0.79578
		0.31467			0.44566	0.26049	0.71166	0.58911		0.60986	0.66401	0.52038	0.71685	0.58775	0.31553	0.42668
		0.42811			0.279	0.26049	0.90783	0.58911		0.46783	0.66401	0.61484	0.86785	0.67988	0.78373	0.49775
		0.47622			0.30007	0.25256	1.1387	0.34085		0.28222	1.199	0.65706	0.61749	1.5501	0.91222	0.79065
		0.47622			0.6781	0.20097	0.48937	0.54946		0.41395	0.9434	0.68081	1.283	0.99887	1.0408	1.3642
		0.7234			0.51726	0.2795	0.51684	0.61606		0.366	0.76551	0.43672	0.89542	0.78405	0.71663	1.7955
		0.39866			0.38987	0.34419	1.1171	0.8768		0.3004	0.75817	0.30819	0.81104	0.47996	0.70209	0.74571
		0.21666			0.41744	0.2735	0.97088	0.65415		0.48147	0.37405	0.55477	0.8309	0.35912	0.61501	0.64537
		0.25796			0.37782	0.2735	0.37673	0.49681		0.3407	0.87901	0.45455	0.64162	0.39104	0.9448	1.2324
		0.47959			0.31834	0.31433	0.84121	0.41728		0.89955	0.9869	0.46698	0.46308	0.39463	0.56281	0.91176
		0.24894			0.65364	0.21754	1.0653	0.64017		0.338	0.62647	0.50649	1.0169	0.43695	0.95931	0.60478
		0.29219			0.39578	0.28324	0.84585	0.53845		0.338	0.36901	0.8122	1.0715	0.78036	0.95456	1.0941
		0.4863			0.47047	0.18202	0.91217	0.42279		0.3513	0.80211	0.91395	1.448	0.8254	0.72593	1.152
		0.47367			0.44336	0.25352	1.1114	0.42302		0.46434	0.94087	1.255	1.4074	0.53894	1.8275	0.6048
		0.43953			0.2852	0.25601	0.58437	0.42302		0.49978	1.0179	0.71612	1.5208	0.40913	1.3011	0.82809
		0.32997			0.26192	0.3446	0.41506	0.67416		0.39227	0.52117	0.804	1.0794	0.44744	0.85485	0.69501
		0.32343			0.47915	0.34334	0.35293	0.56498		0.39227	0.94086	0.53889	0.95836	0.82546	0.62373	0.71627
		0.36878			0.68865	0.2888	0.51136	0.50943		0.54515	0.81137	0.64024	0.54884	0.52302	0.79337	0.76005
		0.39048			0.40145	0.30924	0.64721	0.50943		0.40507	0.85767	0.60194	0.8989	0.63381	0.79222	1.1067
		0.72635			0.38511	0.36824	0.47842	0.49015		0.6633	0.80253	0.63821	0.89031	1.0276	0.69436	0.86508
		0.68339			0.3899	0.41126	0.52107	0.43786		0.47863	0.74724	0.77546	0.88772	0.73803	0.85527	0.64922
		0.3708			0.53237	0.24797	0.43712	0.42995		0.89673	0.62803	0.40771	0.89414	1.1398	0.81659	0.63247
		0.62731			0.40529	0.23535	0.4301	0.26817		0.29862	0.43509	0.79309	1.0174	0.5181	0.80404	1.0425
		0.29496			0.47317	0.40992	1.1212	0.47854		0.38623	1.3871	0.64838	0.44602	0.38392	0.48498	1.4951
		0.2485			0.50436	0.47075	0.749	0.55092		0.28426	0.76632	0.41897	0.74677	0.72647	0.23076	1.3529
		0.28394			0.66535	0.53076	0.4364	0.41901		0.4791	0.68907	0.77522	0.65828	0.72539	0.2023	0.99382
		0.30912			0.41906	0.39309	0.45226	0.41901		0.35523	0.99595	0.44181	0.58273	0.63397	0.35329	0.60318
		0.25336			0.48006	0.22225	0.45226	0.47694		0.45387	0.99638	0.40176	0.71168	1.4308	0.37376	0.79863
		0.2874			0.4316	0.26218	0.45226	0.55949		0.22719	0.38208	0.57745	0.55292	0.66601	0.48459	0.56417
		0.30788			0.4713	0.30557	0.48086	0.39335		0.29149	1.5016	0.47161	1.2157	0.60789	0.81218	0.55067
		0.48962			0.43191	0.47871	0.31091	0.60235		0.35586	0.73741	0.76509	0.83372	0.59388	0.62246	0.70348
		0.30376			0.40796	0.29538	0.58046	0.45082		0.30077	0.72631	0.49295	0.92315	0.81165	0.38251	0.55756
		0.4604			0.42913	0.36673	0.56173	0.45813		0.32534	0.42887	0.56307	0.50152	0.58177	0.39897	0.3973
		0.45814			0.38644	0.32837	0.43539	0.54817		0.38883	0.64508	0.30829	0.79515	0.5655	0.53917	0.33386
		0.41806			0.38644	0.41823	0.81737	0.61365		0.25268	0.3533	0.49541	0.63971	0.6307	0.3181	0.25588
		0.41806			0.60692	0.34848	0.47032	0.55871		0.25268	0.69284	0.60184	0.53232	0.73143	0.28722	0.51777
		0.21087			0.33958	0.34182	0.75794	0.55871		0.7051	0.94554	0.70205	0.79689	0.5008	0.27142	0.34856
		0.26949			0.48384	0.37916	1.1929	0.55871		0.27586	0.62481	0.64065	0.63833	0.6346	0.36685	0.45225
		0.26398			0.55246	0.28432	1.0551	0.44498		0.37876	0.69333	0.31595	0.57273	0.62364	0.50263	0.4351
		0.16175			0.78258	0.26485	0.51788	0.90419		0.54192	0.45812	0.60184	0.5324	0.37294	0.66002	0.4351
		1.2699			0.44712	0.20442	0.47885	0.57992		0.5689	0.51962	0.70205	0.49062	0.61363	0.65502	0.4452
		0.53857			0.38144	0.39688	0.51652	0.64514		0.85493	0.73785	0.64065	0.75467	0.57786	0.56735	0.57017
		0.28306			0.40326	0.49288	0.69923	0.59534		0.63958	0.5341	0.32938	0.73795	0.29462	0.42712	0.43374
		0.26662			0.3384	0.29344	0.53847	0.69654		0.37317	0.5786	0.39623	0.73716	0.67655	0.47407	0.36013
		0.26662			0.42435	0.37163	0.36487	0.70705		0.48989	0.61379	0.37591	0.5731	0.60481	0.5792	1.782
		0.47184			0.28408	0.52753	0.94673	0.70705		0.37677	0.65479	0.41821	0.77067	0.71833	0.37506	0.54132
		0.23736			0.50486	0.61249	0.38124	0.57793		1.018	0.60969	0.25019	0.82552	0.41598	0.45428	0.39199
		0.7078			0.55834	1.0776	0.53726	0.68577		1.018	0.54851	0.58045	0.60041	0.47639	0.98234	0.50456
		0.23459			0.76808	0.75398	0.48403	0.61376		0.42704	0.64903	0.50377	1.1667	0.63216	0.33555	0.49028
		0.22741			0.44007	0.65312	0.5489	0.44568		0.41097	1.1741	0.49089	1.3601	0.58889	0.71798	2.0351
		0.62008			0.33213	0.26534	0.42638	0.26258		0.46717	0.4076	0.40489	0.92744	0.73028	0.56555	1.0771
		0.57461			0.53279	0.29248	0.3925	0.55446		0.55608	0.76885	0.51818	1.0597	0.69772	0.74161	1.1029
		0.26668			0.29013	0.26626	0.53602	0.43754		0.33879	0.73781	0.50567	0.81466	0.77815	0.90051	2.126
		0.28755			0.29096	0.36184	0.74042	0.44594		0.31927	0.70085	0.50947	0.53341	0.31925	0.89405	0.53813
		0.37555			0.53332	0.24272	0.51747	0.42615		1.4139	0.90608	0.6353	0.58395	0.51009	1.0272	0.90285
		0.37555			0.29094	0.49499	0.34416	0.36811		0.41945	0.95968	0.58851	0.67678	0.55067	0.77987	0.79641
		0.3574			0.57007	0.27408	0.4274	0.54457		0.3235	0.93846	0.51723	0.77022	0.54457	0.58375	0.63076
		0.3574			0.43885	0.27408	0.59103	0.81126		0.39851	0.34022	0.55608	0.77022	0.50953	1.1678	0.65273
		0.27537			0.38982	0.44319	0.43497	0.56821		0.34252	0.57967	0.5927	0.54801	0.5822	0.94484	0.67901
		0.58858			0.61971	0.37953	0.44538	0.42344		0.40734	0.58578	0.2593	0.60853	0.69393	0.92519	0.90316
		0.53889			0.71989	0.39799	0.40933	0.61702		0.31843	0.37667	0.50748	0.68303	0.54492	0.87958	0.87649
		0.47326			0.53758	0.30828	0.60989	0.75644		0.33775	1.521	0.40822	0.66788	0.50288	0.7598	0.69357
		0.20878			0.44908	0.36382	0.60834	0.75644		0.76849	1.4044	0.44007	0.64324	0.39173	0.718	1.1573
		0.44659			0.66251	0.4669	0.51026	0.52391		0.577	1.2531	0.58207	1.2659	0.4667	0.57295	1.4918
		0.23652			0.36953	0.33066	0.83199	0.6177		0.46153	1.2239	0.56592	1.216	0.46677	1.036	1.5269
		0.37851			0.47902	0.37044	0.39293	0.57419		0.41344	0.79368	0.62655	1.3863	0.68724	1.4142	0.79002
		0.27989			0.47293	0.34306	0.37	0.46254		0.76555	0.67443	0.53159	0.35982	0.66847	0.57372	0.67865
		0.20234			0.46077	0.51239	0.45573	0.37641		0.76555	0.67443	0.28719	0.81493	0.58162	1.0098	0.37935
		0.61716			0.38288	0.40772	0.75509	0.3994		0.50908	0.6267	0.49493	0.99523	0.60266	0.67052	0.56463
		0.33553			0.31681	0.494	0.7995	0.31961		0.50908	1.0434	0.34162	0.99992	0.68709	0.85206	0.64011
		0.22419			0.28445	0.46252	0.63882	0.43616		0.53284	1.0661	0.46145	0.67324	0.78336	1.016	0.86115
		0.30232			0.44849	0.83436	0.6022	0.39927		0.41664	0.46488	0.47806	0.49722	1.037	0.84021	0.77122
		0.34617			0.4919	0.75967	0.50756	0.61282		0.49507	1.3043	0.28561	0.41787	1.1324	0.84021	0.49499
		0.34179			0.71782	0.48999	0.57312	0.42737		0.36025	0.63263	0.46229	0.75375	0.68985	1.1546	0.53836
		0.30394			0.5161	0.51722	0.62161	0.69605		1.0775	0.60419	1.0773	0.51194	0.93927	1.2617	1.044
		0.327			0.57111	0.24239	0.44492	0.56962		1.0723	0.42096	0.92495	0.4879	0.58291	0.71975	0.74214
		0.67384			0.23948	0.43011	0.36167	0.66235		0.738	1.3618	0.5431	0.70752	1.2245	0.89583	1.0054
		0.60985			0.39992	0.39299	0.46582	0.85263		0.47767	0.82009	0.76167	0.63795	0.64395	0.63996	0.57049
		0.6057			0.39992	0.28637	0.35217	0.77745		0.40566	1.0553	0.54603	1.3041	0.97236	0.74326	0.57049
		0.57894			0.49899	0.26776	0.39436	0.42602		0.84465	0.72037	0.6514	0.70427	1.3788	0.54927	0.75173
		0.17012			0.36722	0.36321	0.53007	0.43267		0.36939	0.72037	0.47886	0.53177	1.3438	0.90258	0.55124
		0.30119			0.33205	0.49086	0.34806	0.80875		0.48581	0.63219	0.32717	0.42691	0.9643	1.4167	1.2155
		0.3413			0.43882	0.40303	0.52059	0.29836		0.92155	0.76281	0.33767	0.74196	0.90843	0.58844	1.4308
		0.39077			0.42434	0.40303	0.26918	0.34944		0.48145	0.82866	0.26634	0.46923	0.5388	1.1277	1.2351
		0.31872			0.66272	0.27612	0.33383	0.52425		0.95759	0.74718	0.25057	0.94725	0.85482	0.70595	0.58452
		0.3391			0.37781	0.42479	0.89726	0.40859		0.52416	0.48534	0.33561	0.42261	1.2857	0.89893	1.1987
		0.30275			0.40658	0.35179	0.56427	0.33272		0.58919	1.2449	0.33561	0.51544	1.3015	0.80379	0.61287
		0.37843			0.7089	0.21731	0.60762	0.40437		1.1836	0.47098	0.35442	0.6353	0.79656	1.2565	0.43742
		0.33613			0.5156	0.4309	0.34921	0.62817		0.98671	0.37571	0.28201	0.65799	1.2733	0.73526	0.63185
		0.40104			0.61176	0.56392	0.70115	0.34211		1.1251	0.7429	0.84239	0.8004	1.1757	1.3535	0.74855
		0.45287			0.89323	0.78336	0.41899	0.53479		1.1251	0.45192	0.75905	0.7865	0.8901	0.91833	0.49419
		0.50265			0.52126	0.8904	0.61816	0.47586		0.63061	0.5611	0.23839	0.58982	0.67594	0.85352	0.45643
		0.42577			0.5077	0.3021	0.66115	0.47586		0.44818	0.73138	0.20504	1.0429	1.2066	1.0877	0.58204
		0.42577			0.46627	0.28621	0.75591	0.52841		0.78976	0.48117	0.45569	0.40827	1.154	0.39844	1.3089
		0.27921			0.20267	0.49918	0.4929	0.46157		1.2319	0.53809	0.42267	0.39743	0.4819	1.0697	1.3602
		0.17432			0.2732	0.25453	0.45212	0.36073		1.1893	0.45891	0.54972	0.48029	0.75232	0.66915	1.3547
		0.22453			0.28051	0.31192	0.34983	0.4322		0.48265	0.44214	0.57414	0.46551	0.75232	0.48057	0.62992
		0.22453			0.3378	0.35834	0.51231	0.42249		0.77994	0.9067	0.30684	0.91984	0.74296	0.7175	1.613
		0.21415			0.36696	0.35834	0.45805	0.32497		0.51291	0.74468	0.6483	0.58926	1.1951	1.1194	1.0079
		0.20701			0.33083	0.34914	0.47369	0.96804		0.48323	0.43705	0.46487	0.58174	1.1455	1.3834	1.0642
		0.28253			0.41857	0.93939	0.47193	0.52769		0.503	0.55158	0.48971	0.58174	1.1455	0.89882	0.75997
		0.24161			0.31893	0.2662	0.63366	0.37377		0.51824	0.57504	0.55378	1.1046	0.90998	1.2349	1.6537
		0.21724			0.4952	0.22117	0.47924	0.48646		0.50333	0.63286	0.39206	0.95863	1.5858	0.62936	0.78224
		0.3457			0.59123	0.32358	0.48535	0.49242		0.39759	0.32102	0.64462	1.0961	2.2235	0.72115	0.7419
		0.28049			0.72982	0.24644	0.32816	0.44107		0.77602	0.27819	0.75872	0.41417	1.262	0.60658	1.5622
		0.2816			0.43586	0.2219	0.5898	0.59676		0.86981	0.6306	0.47689	1.1918	1.0939	0.67757	0.69577
		0.39918			0.48179	0.42411	0.30829	0.68345		0.42751	0.48468	0.91882	0.7988	1.0274	0.67757	0.79915
		0.45523			0.25285	0.43577	0.30829	0.47611		0.44017	0.88212	0.68336	0.45635	0.73081	0.63111	1.0793
		0.38235			0.25547	0.26235	0.27881	0.47306		0.50102	1.1849	0.35073	0.58222	0.91865	0.55948	0.60316
		0.47699			0.47701	0.25931	0.44952	0.64641		0.33619	1.2808	0.74453	0.58222	1.0277	0.69137	0.51755
		0.26369			0.39501	0.49192	0.38531	0.94462		0.30804	0.79182	0.74441	1.0794	0.84043	0.94346	0.369
		0.30219			0.29861	0.28311	0.38448	1.5223		0.39329	0.84797	1.0015	0.36973	1.347	1.0023	0.63387
		0.32397			0.2885	0.29189	0.6171	1.2687		0.39329	0.39908	0.5376	0.62444	1.347	0.45324	0.73718
		0.39753			0.29054	0.3247	0.30296	0.46344		0.30033	0.55863	0.73072	0.49237	2.7537	0.37653	0.68692
		0.36584			0.34567	0.28023	0.29502	0.49374		0.46101	0.92474	0.47543	0.46918	1.1464	0.43672	1.441
		0.37392			0.27036	0.34432	0.26099	0.37762		0.68584	0.39538	0.81947	0.68371	0.75945	0.91679	0.67149
		0.22997			0.41989	0.24919	0.33244	0.49328		0.97852	0.5023	0.60981	0.63546	1.3808	1.5799	0.43154
		0.25875			0.45398	0.35109	0.35825	0.327		0.61595	0.57354	0.56442	0.26557	1.2747	0.4661	0.8667
		0.21705			0.33632	0.25866	0.65505	0.37754		0.59374	0.60906	0.78213	0.85371	1.3011	1.3064	1.466
		0.31649			0.36284	0.25979	0.62091	0.3997		0.83578	0.33469	0.55013	0.7357	0.78657	0.85705	0.49902
		0.21601			0.58801	0.40024	0.62091	0.40644		0.54478	0.72631	0.5535	0.34517	0.84277	0.6864	0.4677
		0.25279			0.24583	0.22986	0.50408	0.31724		0.55391	1.1362	0.68575	0.44841	1.4127	1.4318	0.55198
		0.32984			0.37208	0.33664	0.42742	0.37423		0.55391	1.0094	0.76308	1.1649	0.97998	1.2713	0.94824
		0.29943			0.87535	0.227	0.53492	0.49966		0.92873	0.89986	0.77631	0.4065	0.85707	0.76725	0.92727
		0.5576			0.59595	0.26405	0.592	0.45164		0.68236	0.68345	0.75005	0.59976	0.96878	0.87805	0.52758
		0.35174			0.2307	0.44485	0.48433	0.45164		0.82755	0.54358	0.29769	0.40668	0.94227	0.70747	0.51877
		0.31834			0.43837	0.47278	0.48569	0.38177		0.95577	0.48011	0.52374	0.46555	0.77272	0.81775	0.27092
		0.30243			0.3754	0.53159	0.33818	0.4663		0.42981	0.24905	0.23514	0.37771	0.61844	0.51266	0.47191
		0.22978			0.3754	0.20116	0.57506	0.41682		0.3931	0.88536	0.30016	0.38577	0.68488	0.64175	0.80781
		0.33889			0.42113	0.29993	0.40415	0.67073		0.43417	0.60019	0.30016	0.42162	0.48691	0.56436	0.60652
		0.28964			0.35375	0.33537	0.39894	0.67073		0.32126	0.26151	0.73754	0.25265	0.44972	0.56586	1.4509
		0.26373			0.4812	0.52338	0.3632	0.53594		0.33118	0.53611	0.18082	0.32928	0.36096	0.69111	1.0516
		0.36308			0.39279	0.32582	0.35363	0.53594		0.40524	0.5195	0.49974	0.40439	0.77876	0.54428	1.1896
		0.16377			0.41882	0.26254	0.69712	0.55914		0.80109	0.50255	0.20995	0.62776	0.29297	0.48446	1.2237
		0.24994			0.52539	0.33516	0.36473	0.42267		0.42876	0.49076	0.86652	1.0641	1.0913	0.60618	0.44806
		0.30063			0.36986	0.29094	0.57983	0.43263		0.60129	0.39352	0.29713	0.56603	0.33234	0.40236	0.24402
		0.22037			0.34261	0.33331	0.44911	0.43263		0.31679	0.46563	0.21822	0.89804	0.55877	0.40165	0.3951
		0.24726			0.3809	0.32147	0.43372	0.53542		0.43365	0.52359	0.76876	0.69552	0.69314	0.66428	0.3951
		0.17788			0.86041	0.31464	0.60782	0.53542		0.4305	0.40432	0.49033	0.5864	0.3718	1.749	0.36754
		0.29742			0.52185	0.53085	0.72935	0.3947		0.77078	0.30865	0.49409	0.74039	0.54935	0.98684	1.021
		0.26664			0.53185	0.57745	0.3742	0.54931		0.33069	0.22704	0.37367	1.0674	0.63101	1.0113	0.71768
		0.38269			0.45228	0.63884	0.35812	0.54931		0.39018	0.32294	0.50623	0.44246	0.52016	0.53858	0.22982
		0.42577			0.49917	0.61961	0.72029	0.49599		0.42229	0.46397	0.39571	0.60659	0.6271	0.71025	0.18591
		0.32943			0.45848	0.47121	0.6958	0.59488		0.50103	0.45895	0.39689	0.66363	0.6271	0.85479	0.31381
		0.22889			0.53009	0.31725	0.56099	0.47436		0.38312	0.2808	1.1939	0.97069	0.77295	0.62045	0.2706
		0.29636			0.6912	0.39172	0.32907	0.29337		0.32829	0.33706		0.97069	0.45796	0.62045	0.25829
		0.24983			0.36946	0.49788	0.78786	0.29348		1.3558	0.35543		0.80272	0.90953	0.4888	0.49134
		0.23474			0.32036	0.28375	0.83862	0.40559		0.36304	0.58451		0.86175	1.0485	0.70864	0.55184
		0.2174			0.45586	0.26825	0.62836	0.38542		0.33295	0.40096		0.60432	0.85883	0.59071	0.98713
		0.27067			0.63077	0.21217	0.39856	0.4255		1.1219	0.40899		0.71907	0.86789	0.57971	1.585
		0.19178			0.45175	0.36266	0.31721	0.66711		0.98398	0.68617		1.0572	0.62566	0.5594	0.7797
		0.28236			0.60043	0.41269	0.77851	0.40813		0.68608	0.64256		0.76298	0.65467	0.7643	0.99803
		0.50663			0.33396	0.33311	0.77132	0.57213		0.52139	0.67031		0.55775	0.63711	0.72837	0.66112
		0.50053			0.39826	0.35612	0.35583	0.59256		0.62705	0.41758		0.63405	0.71443	0.98028	0.70327
		0.25917			0.18309	0.31263	0.43717	0.66286		1.0484	1.0954		0.83375	0.79195	1.8809	0.76182
		0.29958			0.47627	0.26618	0.86026	0.43289		0.32216	1.0434		1.255	0.62017	1.0255	0.76187
		0.38897			0.41296	0.28966	0.81409	0.38526		0.31695	0.4807		0.67401	0.82256	1.0494	1.2351
		0.34287			0.40758	0.54882	0.62846	0.57621		0.29415	0.36194		0.58443	0.75871	0.74999	1.0286
		0.44363			0.33342	0.55901	0.34851	0.75573		0.38239	0.33917		0.70151	0.86449	0.66306	1.0694
		0.42066			0.42829	0.34576	0.71586	0.43654		0.24227	0.55518		1.1194	0.65861	0.68152	0.51581
		0.393			0.27154	0.33925	0.66543	0.45731		0.45578	0.46997		0.55038	1.0598	0.33765	0.74054
		0.41008			0.47415	0.80876	0.83144	0.4381		0.31561	0.51394		0.53074	0.88308	0.41199	0.68535
		0.26566			0.45189	0.3478	0.36557	0.38436		0.74018	0.40519		0.40556	0.64358	0.63728	0.8372
		0.86418			0.3274	0.22805	0.51323	0.33627		0.95682	0.4034		0.75268	0.6933	0.39086	1.118
		0.36499			0.38478	0.37787	0.64072	0.3099		0.35422	0.53251		1.2254	0.67551	1.0198	0.97457
		0.30054			0.53667	0.26468	0.56493	0.52497		0.56844	0.53267		0.45649	1.1069	0.35833	0.81269
		0.54498			0.40933	0.31961	0.35656	0.36194		0.41682	0.31827		1.9099	0.69259	0.54798	0.76939
		0.31382			0.30923	0.60502	0.338	0.29329		0.37044	0.25121		0.8474	0.58458	0.55742	0.81838
		0.35056			0.36879	0.44635	0.32393	0.42323		0.476	0.45713		0.7497	1.2889	0.47681	1.4692
		0.28855			0.40417	0.47384	0.36076	0.51048		0.30624	0.26703		0.51715	0.38131	0.45301	1.529
		0.27349			0.34773	0.92864	0.42977	0.42484		0.49454	0.39935		0.56603	0.56209	0.45554	1.0887
		0.17593			0.38263	0.75118	0.55308	0.51293		0.49454	0.34615		0.69532	0.70671	0.45992	1.5645
		0.61169			0.43715	0.38366	0.69753	0.3979		0.28968	0.2792		0.76406	0.51885	0.48309	1.3357
		0.58964			0.42018	0.37327	0.34955	0.33253		0.79671	0.44656		0.6899	0.45057	0.5635	0.9966
		0.47349			0.40204	0.31016	0.50963	0.42829		0.39692	0.30561		0.86302	0.57474	0.68098	0.83379
		0.41682			0.40204	0.59466	0.58314	0.48794		0.35346	0.44209		0.91932	0.79567	0.47309	0.88846
		0.19593			0.9022	0.40508	0.60187	0.57017		0.38523	0.57127		0.97439	0.7545	0.49391	0.65496
		0.22926			0.7285	0.3541	1.007	0.3965		0.4914	0.201		0.64277	0.29526	0.44942	0.62061
		0.50141			0.27812	0.41761	0.78109	0.46476		0.59658	0.57408		1.1294	0.39262	0.49282	0.74178
		0.18128			0.37347	0.37224	0.43546	0.4471		0.54336	0.46061		1.1294	0.26001	0.88153	1.0785
		0.46114			0.43369	0.57545	0.42983	0.35628		0.52145	0.42223		1.0736	0.33785	1.1912	1.0971
		0.6225			0.44045	0.33252	0.35942	0.51062		0.33677	0.4884		0.64996	0.33753	0.23288	1.1828
		0.19406			0.42728	0.4019	0.58811	1.0152		0.34785	0.30509		0.58845	0.32242	0.51679	0.88356
		0.23234			0.30281	0.49619	0.45653	0.47569		0.32138	0.46342		1.1022	0.39292	0.44605	0.84931
		0.17602			0.26499	0.3177	0.42944	0.4252		0.48749	0.34446		0.49953	0.3385	0.25833	0.72897
		0.32544			0.38795	0.49478	0.37141	0.24631		0.48147	0.31224		1.0397	0.45463	0.65325	0.92099
		0.32544			0.62952	0.53722	1.0458	0.30202		0.46002	0.38502		1.2351	0.74415	0.27623	0.92099
		0.20513			0.59068	0.52992	0.34869	0.44558		0.46002	0.51243		0.70192	0.34322	0.41465	0.50591
		0.38921			0.40773	0.56386	1.1201	0.3526		0.45948	0.94846		0.57466	0.50009	0.34014	0.53407
		0.41905			0.40773	0.64545	0.69744	0.53972		0.54277	0.57346		0.70839	0.41689	0.16536	0.97063
		0.18387			0.43471	0.64545	0.46402	0.38284		0.51583	0.57346		0.83464	0.2673	0.40159	0.77091
		0.312			0.51109	0.56748	0.40447	0.43267		0.71538	0.67254		0.80665	0.41231	0.40159	0.55532
		0.24347			0.34235	0.82675	0.6221	0.56125		0.71538	0.47		0.81851	0.58699	0.40948	0.4632
		0.37686			0.33525	0.73087	0.60291	0.56125		0.54733	0.65347		0.84334	0.48169	0.51358	1.27
		0.20793			0.50072	0.80288	0.54416	0.44674		0.25441	0.75084		1.3711	0.54357	0.26308	1.4832
		0.30212			0.39312	0.82911	0.50355	0.46588		0.32958	0.35731		0.91061	0.65423	0.53065	1.3331
		0.28303			0.53952	0.54953	0.89494	0.30684		0.47758	0.39791		0.89117	0.47094	0.59377	0.79299
		0.46358			0.5113	0.49041	0.61891	0.22261		0.42788	0.48717		1.0626	0.40413	0.41774	1.7616
		0.40181			0.52966	0.45621	0.57279	0.37424		0.35593	0.42025		0.66399	0.54676	0.53349	1.2739
		0.32921			0.47015	0.54131	0.63628	0.48338		0.36436	0.39001		0.90289	0.42308	0.23038	0.77997
		0.35562			0.73853	0.42555	0.84488	0.57087		0.38917	0.36306		1.1241	0.73594	0.16159	0.73792
		0.33924			0.30993	0.89715	0.44501	0.33068		0.37565	0.33865		0.74117	0.7578	0.28574	1.0931
		0.27892			0.34932	0.45715	1.0238	0.28383		0.54779	0.24849		0.99289	0.71235	0.37258	0.92351
		0.32643			0.38781	0.6664	0.90608	0.31888		0.61109	0.41193		0.84444	0.66562	0.90307	0.57364
		0.29			0.34938	0.56364	0.82093	0.4207		0.80023	0.90621		0.81982	0.38041	0.33324	1.4344
		0.33647			0.3967	0.56364	0.41648	0.47895		0.57145	0.42143		0.98879	0.32114	0.87186	0.69138
		0.2449			0.36716	0.56364	0.83414	0.46731		0.42081	0.38643		0.98461	1.1809	0.39054	0.65049
		0.38059			0.33513	0.56364	0.88602	0.59149		0.42732	0.40977		1.0943	0.94694	0.29095	1.0353
		0.37351			0.32521	0.40612	0.58876	0.29891		0.42732	0.40977		0.72909	0.28421	0.39846	0.37735
		0.69739			0.61036	0.60473	0.49452	0.44368		0.39377	0.44651		0.92708	0.42892	0.36394	0.74637
		0.68911			0.45406	0.45369	0.71278	0.2649		0.49427	0.48476		0.63586	0.44407	0.29825	0.55468
		0.25803			0.26942	0.58092	0.55855	0.38003		0.49159	0.36659		0.6286	0.35054	0.57658	0.62524
		0.3041			0.2211	0.40269	0.56712	0.3593		0.44401	0.78565		1.1147	0.30399	0.44488	0.639
		0.53299			0.31683	0.36159	0.36928	0.42689		0.36678	0.44746		0.57682	0.52217	0.55862	0.68862
		0.52164			0.30564	0.49533	0.5092	0.81981		0.55766	0.39561		1.3007	0.44598	0.39251	0.73251
		0.1743			0.39763	0.5152	0.73593	0.27414		0.44478	0.85488		1.2356	0.39227	0.86894	0.744
		0.18731			0.58851	0.63687	0.555	0.35292		1.0729	0.49376		0.92315	0.27146	0.59805	0.86517
		0.26674			0.38012	0.50197	0.76205	0.28185		0.25463	0.61713		0.96973	0.44893	1.1006	1.4641
		0.12219			0.35812	0.85374	0.48299	0.29812		0.82574	0.6684		1.2585	0.44893	1.1142	1.5505
		0.65452			0.40251	0.85374	0.42094	0.42768		1.1597	0.73113		1.9177	0.49905	1.0576	0.96547
		0.42763			0.49006	0.62555	0.60687	0.42768		1.2623	0.64512		1.5628	0.71085	0.43548	0.44996
		0.19291			0.53665	0.51928	0.53542	0.29567		0.82345	0.26267		1.6503	0.62187	1.1217	1.2692
		0.35227			0.44848	0.43044	0.42941	0.44929		0.51933	0.38303		0.89663	0.62187	1.074	1.4068
		0.407			0.50558	0.65243	0.93623	0.3264		0.69125	0.41003		1.663	0.72363	0.46743	1.0981
		0.407			0.61804	0.52694	0.56276	0.65606		0.79968	0.42078		1.0268	0.37653	0.90276	0.8502
		0.26704			0.44822	0.52694	0.89918	0.49468		0.33877	0.29359		1.7272	0.59334	0.67288	0.67194
		0.52808			0.54374	0.47773	0.46501	0.52466		0.49442	0.37992		1.1648	0.59334	0.5183	0.54847
		0.20077			0.36896	0.42392	0.88061	0.3304		0.66153	0.39295		2.1311	0.50416	0.57633	0.5714
		0.29244			0.25261	0.21571	0.79697	0.31363		0.36274	0.80445		1.1685	0.66818	0.56721	0.92033
		0.3203			0.31764	0.80584	0.47763	0.30582		0.40955	0.19759		0.98431	0.3947	0.72406	0.47903
		0.26823			0.30061	0.69493	0.40966	0.33648		0.30207	0.39667		1.0371	0.7263	1.2644	0.71928
		0.63501			0.25999	0.53271	0.35696	0.5955		0.35195	0.45385		1.1951	0.4009	0.95265	0.684
		0.5439			0.83476	0.47711	0.2499	0.38216		0.43482	0.27491		1.202	0.5383	0.62444	0.69369
		0.23709			0.27854	0.34166	0.39747	0.39133		0.4084	0.40381		1.3875	0.36754	0.64168	0.51026
		0.25272			0.38366	0.45735	0.50088	0.39133		0.4084	0.29897		1.5377	0.26849	0.5327	0.51857
		0.23682			0.31179	0.65528	0.39214	0.58376		0.35159	0.46267		1.1535	0.25841	0.64959	0.23782
		0.22258			0.39255	0.26038	0.34225	0.21685		0.81135	0.14479		1.154	0.53356	0.87808	0.47123
		0.26106			0.38179	0.25582	0.34718	0.33139		0.86538	0.40886		0.64865	0.53356	0.83956	0.48573
		0.22874			0.48254	0.30042	0.97124	0.33109		0.5098	0.27204		0.65637	0.97723	1.5279	0.57494
					0.4389	0.435	0.73444	0.46579		0.5098	0.39837		1.1895	0.4391	1.1034	0.73734
					0.4389	0.37577	0.54208	0.32611		0.32581	0.51109		1.2093	0.44157	0.61316	0.45705
					0.53607	0.44516	0.82702	0.31619		0.35521	0.44687		1.0468	0.59332	0.75035	0.36122
					0.34647	0.2014	0.82702	0.65962		0.66875	0.60366		0.70396	0.81726	0.78413	0.37821
					0.43634	0.23433	0.80666	0.65316		0.35022	0.312		0.87681	0.81726	0.76584	1.7331
					0.37666	0.29189	0.45076	0.30893		0.45354	0.48002		0.83759	0.81726	1.5383	0.60693
					0.41248	0.24383	0.50078	0.34745		0.3752	0.40414		0.92538	0.56984	0.3952	0.41618
					0.63605	0.29641	0.87961	0.5869		0.34517	0.29929		0.73506	0.70579	1.0956	0.52486
					0.3781	0.40053	0.87961	0.43153		0.30177	0.31694		1.246	0.36974	0.72999	0.65111
					0.35536	0.40053	0.37552	0.5704		0.7562	0.2879		0.60542	0.34761	0.81814	2.1106
					0.38287	0.27663	0.3556	0.39822		0.27107	0.27832		0.58071	0.46047	0.99333	1.802
					0.5275	0.19643	0.76119	0.38916		0.28302	0.38659		0.59174	0.56142	0.57744	0.57398
					0.86521	0.39315	0.67026	0.40952		0.27654	0.85751		0.97489	0.5232	0.79967	0.83196
					0.57025	0.39043	1.3507	0.29687		0.50151	0.62303		1.0612	0.89911	0.4495	0.84472
					0.3487	0.39791	0.52386	0.2686		0.50151	0.61815		0.57106	0.49811	0.56505	1.0098
					0.3487	0.40898	0.70592	0.45518		0.43155	0.45517		2.0806	0.34027	0.83987	0.81306
					0.30065	0.27277	0.56337	0.50746		0.48027	0.46603		0.86082	0.57014	0.92646	0.62672
					0.5537	0.76633	0.31278	0.39715		0.31297	0.53505		0.75671	0.57359	0.68095	0.82885
					0.56865	0.27442	0.44743	0.39776		0.37985	0.3693		0.68424	0.62078	0.92964	0.92362
					0.29476	0.21276	0.41226	0.34742		0.32725	0.51074		0.46156	0.54292	0.96573	0.8364
					0.41951	0.58148	0.58229	0.46435		0.75382	0.32223		0.83712	0.77676	0.96573	0.41248
					0.41597	0.57444	0.57338	0.3615		0.74489	0.19922		1.0352	0.47845	0.75471	1.1426
					0.37833	0.69031	0.74939	0.45722		0.2734	0.32017		0.52123	0.45056	0.84481	0.5324
					0.37833	0.31612	0.47892	0.29803		0.34539	0.25735		0.58356	0.3129	1.0222	1.2048
					0.60468	0.31164	1.1871	0.30581		0.29661	0.25822		1.1646	0.34996	1.0222	1.3165
					0.26399	0.25862	1.1871	0.33103		0.40326	0.22526		0.84553	0.43168	0.5448	0.5587
					0.19796	0.53985	0.43449	0.41017		0.32143	0.19567		0.78041	0.70316	0.60367	0.58176
					0.46543	0.47027	0.47436	0.9192		0.75688	0.43099		0.61331	0.44774	0.52383	0.56368
					0.19198	0.97992	0.35546	0.4328		0.29626	0.80986		1.9386	0.57861	0.30439	0.62143
					0.45455	0.38661	1.0855	0.39206		0.54602	0.18636		0.9967	0.57861	0.30439	0.51184
					0.2331	0.197	0.83638	0.30654		0.36155	0.76872		1.0473	0.57861	0.78999	0.66578
					0.54459	0.2557	0.29506	0.71166		0.35948	0.2458		1.3361	1.0634	0.63357	0.63504
					0.49921	0.23399	0.25176	0.47405		0.85278	0.37646		0.72844	0.56267	0.67647	0.4694
					0.20052	0.23242	0.32055	0.49381		0.37594	0.42336		1.0381	0.34377	0.77083	0.42333
					0.28027	0.62003	0.91544	0.81689		0.73975	0.73959		0.9645	0.88408	0.48687	1.1907
					0.27898	0.62003	0.48579	0.46947		0.23988	0.72396		0.80204	0.46639	1.3002	1.0459
					0.27898	0.39927	0.66889	0.39158		0.45336	0.81798		0.70514	0.57874	0.36433	1.4449
					0.19968	0.32175	0.30727	0.35054		0.30504	1.0299		1.2403	0.72453	1.3173	0.66702
					0.31272	0.32175	0.4282	0.43086		0.29349	0.9404		1.5779	0.707	0.38646	0.47612
					0.34337	0.26046	0.73877	0.4078		0.28925	0.51224		0.67601	0.54654	0.56183	0.91406
					0.26576	0.5748	0.25848	0.32176		0.30339	0.31954		0.80582	0.44732	0.3776	0.54874
					0.57944	0.35619	0.46707	0.3557		0.52577	0.28577		1.0062	0.60123	0.9524	0.65123
					0.52121	0.48483	0.26485	0.42057		0.61258	0.45307		1.173	0.83831	0.41486	0.68523
					0.43974	0.57794	0.56133	0.46416		0.29393	0.36256		1.1106	0.62753	0.44988	1.261
					0.55138	0.40479	0.41709	0.56915		0.26883	0.45778		0.50614	0.46446	0.176	1.3663
					0.39929	0.47951	0.42206	0.56915		0.32922	0.37989		1.0192	1.0122	0.77112	0.9198
					0.35663	0.41583	0.34481	0.49847		0.38521	0.41221		1.0875	0.42861	0.4587	0.62705
					0.27754	0.33082	0.40535	1.12		0.33288	0.41221		0.98668	0.49154	0.58049	0.92832
					0.33125	0.33082	0.49631	0.36206		0.30579	0.30199		0.87696	0.43025	0.80025	0.64837
					0.53382	0.58353	0.4544	1.3049		0.19949	0.32442		1.4607	0.60531	0.92215	0.48871
					0.57272	0.92389	0.63919	0.54514		0.67726	0.35057		0.96386	0.38628	0.72956	0.65223
					0.55436	0.37078	0.678	0.53036		0.29953	0.45457		1.5461	0.34736	1.0496	0.49396
					0.32387	0.42448	0.80334	0.30577		0.26334	0.47287		0.97486	0.34736	1.164	0.52249
					0.42723	0.44112	0.35515	0.42581		0.38564	0.33454		0.97819	0.79194	0.39054	1.2874
					0.37942	0.38228	0.2842	0.30983		0.53638	0.46275		1.019	0.8605	0.38804	0.79663
					0.51349	0.40487	0.25313	0.58414		0.24346	0.24451		1.2758	0.80717	0.7902	1.0011
					0.26591	0.38186	0.30957	0.52748		0.48941	0.4213		0.85314	0.42156	1.0587	0.65261
					0.28896	0.34356	0.41326	0.57218		0.45738	0.19675		0.9595	0.48829	0.40723	1.3046
					0.38983	0.35271	0.3072	0.46066		0.43866	0.57044		0.95066	0.51242	0.58375	0.68107
					0.41725	0.35009	0.21987	0.51081		0.41622	0.57044		0.97454	0.55432	0.64132	1.2688
					0.43475	0.32639	0.49338	0.491		0.30074	0.60549		1.0663	0.39247	1.6526	0.86591
					0.41748	0.5244	0.2971	0.35543		0.66076	0.20431		0.98644	0.84004	0.74769	1.2504
					0.29412	0.324	0.46482	0.56094		0.42093	0.26537		1.1944	0.33365	0.62633	0.6823
					0.43892	0.58079	0.31344	0.38523		0.41075	0.20034		0.92217	0.46809	0.41264	0.65229
					0.3326	0.58079	0.31027	0.42093		0.42522	0.26623		0.57955	0.45734	0.63178	0.67461
					0.41927	0.30137	0.61588	0.71268		0.22296	0.26623		0.61686	0.52126	0.51974	1.1734
					0.57615	0.61228	0.28028	0.33102		0.38664	0.3639		1.2054	0.46321	1.5676	0.63355
					0.38014	0.5395	1.2076	0.32164		0.34439	0.33728		0.70216	0.42822	0.67417	0.90129
					0.40411	0.70914	1.0758	0.50918		0.49305	0.29042		0.76668	0.43715	0.79978	0.99054
					0.27069	0.70914	1.1478	0.52617		0.31667	0.37238		0.42206	0.64192	0.96603	0.57038
					0.31239	0.5833	0.3398	0.94715		0.25345	0.29613		0.60867	0.79069	0.4626	0.69924
					0.70237	1.0498	0.18027	0.81233		0.42458	0.36259		1.3528	0.79069	0.55825	1.0246
					0.46091	0.30693	0.74198	0.74191		0.42458	0.37064		0.80456	0.43711	0.57259	0.56996
					0.49509	0.65711	0.80266	0.74327		0.38746	0.3148		0.70992	0.52365	0.2664	0.8376
					0.49509	0.65711	0.36698	0.35325		0.42984	0.34172		1.1943	0.52365	1.5049	1.7087
					0.38389	0.44537	0.21769	0.3024		0.2979	0.34172		0.61536	0.44371	0.86078	1.3016
					0.4516	0.47288	0.24031	0.36379		0.43712	0.2488		0.57761	0.62855	0.21009	0.92771
					0.31978	0.9984	0.218	0.49061		0.27945	0.46757		0.79504	0.404	0.35113	1.5631
					0.77533	1.0964	0.24411	0.41771		0.5722	0.80983		0.65201	1.0175	0.35113	0.69249
					0.65558	0.56562	0.472	0.48051		0.26894	0.4505		0.6597	0.27928	0.36003	0.41131
					0.34862	0.44311	0.2197	0.34869		0.26894	0.3348		0.60534	0.46832	0.35792	0.49132
					0.30013	1.1144	0.24957	0.65906		0.28115	0.58746		1.3058	0.39716	0.30402	0.9314
					0.23948	0.72472	0.32202	0.44595		0.32374	0.32607		0.67008	0.32995	0.42193	0.26674
					0.54444	0.46692	0.32301	0.37537		0.2546	0.2742		0.42541	0.54391	0.44611	1.0576
					0.30486	0.33053	0.36356	0.32298			0.28019		0.68149	0.49997	0.45837	1.062
					0.37911	0.3531	0.35806	0.33925			0.41582		0.47215	0.45967	0.4664	0.76555
					0.30534	0.27462	0.33149	0.47			0.32938		0.69252	0.64306	0.37543	0.86093
					0.51707	0.44771	0.31547	0.75797			0.20626		0.59818	0.63502	0.61286	0.48789
					0.45131	0.31789	0.38997	0.34846			0.33892		0.47201	0.45483	0.38528	0.40397
					0.30765	0.4348	0.35231	0.38259			0.46938		0.55447	0.5935	0.63747	0.2391
					0.31254	0.76875	0.42006	0.35842			0.44078		0.55447	0.49698	1.1919	0.48442
					0.30406	0.68977	0.27229	0.39518			0.44704		0.55402	0.35454	0.20688	0.4571
					0.25426	0.48437	0.21251	0.31534			0.27981		0.55295	0.51646	0.22518	0.19574
					0.33491	0.3711	0.26399	0.27193			0.61653		0.8619	0.68073	0.44327	0.34265
					0.30807	0.42342	0.32308	0.35621			0.39961		1.0525	0.82033	0.30135	0.28134
					0.28903	0.71671	0.5008	0.70236			0.36808		0.82216	0.86647	0.53511	0.27717
					0.38885	0.32079	0.21634	0.35582			0.33654		0.62795	0.53765	1.2877	0.38148
					0.27689	0.54833	0.23867	0.49759			0.21997		0.49315	0.41366	1.1561	1.5102
					0.36983	0.54833	0.19098	0.41907			0.22946		0.60302	0.79525	1.2157	0.51463
					0.33966	0.46315	0.32816	0.31026			0.5569		0.5129	0.53389	1.2609	0.5751
					0.23028	0.55727	0.61421	0.72165			0.5042		0.63464	0.7366	1.0797	0.77876
					0.23522	1.0061	0.24697	0.51929			0.5042		0.52702	0.92308	1.3775	1.5519
					0.20129	0.35999	0.27908	0.34376			0.53237		0.60484	1.2758	1.1337	0.54547
					0.52677	0.54266	0.28478	0.4111			0.29716		0.58961	1.1955	1.0423	0.43415
					0.27241	0.4595	0.40162	0.33408			0.32021		0.53277	0.50788	0.8886	0.83108
					0.21884	0.29931	0.33105	0.4286			0.86278		0.44318	0.48174	0.9924	0.93716
					0.25873	0.25167	0.46201	0.37722			0.86668		0.63559	0.56865	0.9924	0.77024
					0.21519	0.35679	0.40743	0.3785			0.19006		1.0389	0.83775	1.2369	0.67194
					0.21797	0.41194	0.37522	0.43213			0.25719		0.56909	0.89962	1.2973	0.53528
					0.27847	0.38326	0.41267	0.47833			0.14444		0.56909	0.59047	0.83093	0.5001
					0.27435	0.44593	0.63494	0.37093			0.37404		0.41271	0.73803	0.71497	0.41039
					0.51592	0.43062	0.68044	0.53347			0.67199		0.48602	0.44748	1.3622	0.60567
					0.25318	0.20827	0.19955	0.55269			0.32967		0.67372	0.44542	1.1355	0.52881
					0.33816	0.31075	0.45301	0.4872			0.28588		0.46003	0.6856	0.54163	0.39852
					0.2723	0.22336	0.37655	0.46897			0.25042		0.42226	0.51946	0.85188	0.51881
					0.20914	0.23539	0.28657	1.1589			0.25042		0.64428	0.50499	0.88044	0.71298
					0.63041	0.26358	0.27717	0.74613			0.39601		0.6056	0.41601	0.72105	0.4322
					0.30048	0.513	0.41633	0.37976			0.51882		0.37043	0.52728	0.68989	0.44149
					0.41136	0.55189	0.29057	0.45068			0.48896		0.44407	0.67565	0.87853	0.31442
					0.35547	0.28441	0.32302	0.5036			0.50873		0.35544	0.42281	1.8845	0.72428
					0.64592	0.30197	0.21726	0.52251			0.3436		0.43567	0.41719	2.8646	0.66606
					0.34465	0.32722	0.28296	0.47764			1.2047		0.66921	0.42963	0.59062	0.57303
					0.66579	0.34833	0.24383	0.37551			0.48141		0.37129	0.52278	0.82479	0.522
					0.35415	0.60057	0.52019	0.3714			0.53661		0.58873	0.4159	1.6738	0.57303
					0.40392	0.48883	0.38755	0.30432			0.45623		0.7653	0.36515	1.3335	0.522
					0.42374	0.31336	0.38965	0.35548			0.45517		0.64926	0.54762	0.71186	0.57303
					0.43778	0.75915	0.32768	0.33031			0.4142		0.53573	0.61943	0.93486	0.522
					0.42196	0.37224	0.26554	0.84217			0.41678		0.71365	0.75271	0.94522	0.57303
					0.72742	0.20731	0.28375	0.32197			0.4171		0.51349	0.61622	0.55521	0.522
					0.61842	0.23912	0.22551	0.41862			0.28658		0.47499	0.59726	0.5881	0.39926
					0.65783	0.40542	0.27835	0.45343			0.21261		0.4616	0.48083	0.66916	0.38873
					0.486	0.30935	0.68549	0.67068			0.23293		0.85459	0.77243	0.84729	0.4275
					0.41097	0.30464	0.94457	0.65915			0.29219		0.33528	1.025	0.71045	0.57303
					0.43618	0.70876	0.53312	0.34935			0.43933		0.41603	0.4811	0.37978	0.522
					0.31873	0.40737	1.5654	0.33984			0.18754		0.63446	0.6353	0.41679	0.2433
					0.69847	0.30174	1.0817	0.53741			0.19298		0.63446	0.84712	1.0166	1.1207
					0.25593	0.29876	0.50973	0.32676			0.21592		0.63446	0.86156	0.76633	1.0019
					0.27783	0.449	0.61573	0.63775			0.5057		0.5793	0.84406	0.80835	0.4219
					0.46761	0.43298	0.45153	0.44894			0.38805		0.5236	0.67075	1.0286	0.88977
					0.71569	0.44168	0.39975	0.3113			0.75581		0.61349	0.50017	1.0063	0.9115
					0.56633	0.394	0.47843	0.29976			0.40605		0.53162	1.0896	0.72529	0.52787
					0.48017	0.34508	0.22424	0.45355			0.20836		0.54725	0.46648	0.94597	1.433
					0.43422	0.31229	0.22852	0.45355			0.2307		0.41111	0.47286	0.52315	0.44565
					0.36163	0.45234	0.5474	0.32002			0.61172		0.60548	0.4431	1.2964	0.66871
					0.38963	0.42599	0.32204	0.56272			0.43364		0.4966	1.0026	0.84277	0.6217
					0.35962	0.4488	0.32204	0.27933			0.27389		0.57695	0.64427	0.51074	0.76181
					0.53986	0.48669	0.38711	0.27792			0.22686		1.5603	0.78676	0.63312	0.67298
					0.88576	0.58857	0.37485	0.56386			0.23332		1.2633	0.85428	0.70758	0.60713
					0.50563	0.41318	0.27547	0.57553			0.29598		1.3583	0.89452	0.70758	0.69015
					0.50563	0.53685	0.26873	0.57553			0.27663		0.46314	0.89613	0.68596	0.75293
					0.42356	0.20565	0.15465	0.98306			0.29737		0.46604	0.92901	0.64634	0.45826
					0.43435	0.33181	0.9171	0.74024			0.39476		0.51117	1.069	0.92676	0.57689
					0.46793	0.23741	0.7042	0.74024			0.39437		0.59832	0.49034	0.93049	0.55989
					0.38194	0.35584	0.29736	0.3173			0.4704		0.58545	1.0327	0.57307	0.52949
					0.36866	0.43025	0.52021	0.95428			0.38299		0.68365	0.56803	0.315	0.50241
					0.44161	0.45622	0.32466	0.79649			0.74097		0.78359	0.54738	0.46144	0.39129
					0.31054	0.39213	0.90457	0.66237			0.81708		0.69551	0.44597	0.52608	0.61277
					0.38462	0.51621	0.97693	0.64265			0.55012		0.763	0.69205	1.3662	0.94037
					0.16825	0.51621	0.66447	1.3595			0.70066		0.91574	0.48119	0.55299	0.76261
					0.22428	0.58957	0.39846	0.79718			0.827		0.66004	0.75029	0.59887	0.49353
					0.41663	0.34293	0.35983	0.38553			0.78578		0.47242	1.006	0.53939	0.64862
					0.59821	0.34611	0.5916	0.37159			0.51454		0.44006	0.79909	0.49562	0.48538
					0.27132	0.41649	0.83283	0.38096			0.45855		0.56074	0.8649	0.37118	0.52858
					0.26982	0.32059	0.3699	0.30382			0.33635		0.55739	0.82688	1.1463	0.39524
					0.95606	0.36717	0.48554	0.35987			0.85871		0.91663	0.93207	0.55853	0.45772
					0.27458	0.36003	0.46452	0.34232			0.85871		0.5288	0.56086	0.53046	0.54795
					0.52438	0.46528	0.46452	0.29349			0.35209		0.66802	0.59681	0.55617	0.73176
					0.50669	0.44046	0.40598	0.31268			0.38569		0.78015	0.97258	1.4982	0.59615
					0.36371	0.40895	0.18383	0.51142			0.36624		1.3415	0.81457	0.59631	0.78441
					0.69853	0.70055	0.46248	0.46181			0.73745		0.35355	0.81457	0.56157	0.64553
					0.44591	0.41183	0.47634	0.5804			0.62118		0.51415	0.93578	0.47732	0.38423
					0.48848	0.54934	0.39138	0.36305			0.2799		0.74565	0.58011	1.0555	0.37311
					0.56697	0.3278	0.39138	0.5506			0.46831		1.1331	0.53617	1.0555	0.56237
					0.47278	0.36325	0.31245	0.45747			0.43194		0.64127	0.51645	0.89112	0.45946
					0.31262	0.29351	0.3224	0.45834			0.49785		0.68815	0.51832	0.56245	0.62256
					0.58979	0.40759	0.56695	0.45834			0.52866		0.90282	0.7063	0.50947	0.72506
					0.37976	0.27592	0.62027	0.44199			0.34464		0.4979	0.89014	0.57192	0.42129
					0.68907	0.72529	0.40049	0.59112			0.40585		0.91644	0.47874	0.80609	0.50263
					0.3807	0.49291	0.26899	0.59738			0.53143		0.67108	0.77082	0.83975	0.66813
					0.62642	0.49291	0.50396	0.38666			0.85811		0.51117	0.40508	0.82899	0.60776
					0.72079	0.36086	0.34124	0.38666			0.58512		0.39922	0.31186	0.97087	0.58962
					0.65049	0.48098	0.50117	0.38512			0.54325		0.288	0.54725	0.99762	0.59193
					0.4473	0.45327	0.23346	0.36075			0.45345		0.67149	0.70771	1.5628	0.60839
					0.34292	0.68179	0.33438	0.89404			0.559		0.42865	0.67612	1.5628	0.41535
					0.42538	0.5475	0.42049	0.58069			0.49172		0.46512	0.5257	0.9008	0.41535
					0.48776	0.54334	0.46258	0.54285			0.45277		0.52181	0.33797	0.86815	0.61208
					0.43908	0.55052	0.69469	0.54285			0.83229		0.49426	0.61508	1.3566	0.81782
					0.52483	0.51127	0.62017	0.50141			0.86783		0.54878	0.6049	0.45726	0.70942
					0.34019	0.34516	1.2653	0.43527			0.67198		0.54878	0.61739	0.24812	0.70942
					0.80365	0.28643	0.3344	0.43527			0.53013		0.51741	0.95864	0.45211	0.44911
					0.74743	0.3502	0.4949	0.61347			0.55895		0.54255	1.0034	0.74819	0.6119
					0.25227	0.33061	0.37864	0.51581			0.55895		0.58877	0.88369	0.32539	0.8376
					0.69915	0.42281	0.33496	0.43074			0.52457		0.40385	1.2094	0.30524	0.45508
					0.43099	0.31714	0.29916	0.45796			0.59554		0.44003	1.3457	0.45202	0.8816
					0.45434	0.41211	0.66839	0.39231			0.35784		0.49031	0.60783	0.50352	0.6175
					0.56332	0.39906	0.71542	0.3165			0.33145		0.56438	0.61168	0.53172	0.79183
					0.82014	0.44184	0.81713	0.25511			0.41266		0.74565	0.6551	0.53424	0.98924
					0.51602	0.50822	0.30164	0.46275			0.51823		0.57505	0.44498	0.4987	0.57845
					0.35256	0.45525	1.2865	0.4783			0.97007		0.46575	0.58899	0.62814	0.47979
					0.32624	0.34504	0.93696	0.37423			0.6671		0.41159	0.63645	0.73937	0.65625
					0.71317	0.48321	0.37335	0.39037			0.89449		0.78314	0.45093	1.3549	0.52059
					0.62407	0.75063	0.43629	0.31557			0.40611		0.46794	0.80532	0.61476	0.55193
					0.34792	0.63454	0.79923	0.53594			0.4394		0.52949	0.656	0.66444	0.40458
					0.2966	0.64527	0.38811	0.42202			0.481		0.45119	0.67573	0.42497	0.90517
					0.37765	0.36807	0.90484	0.27196			0.49988		0.7239	0.52661	0.31286	0.53401
					0.49515	0.63552	0.88903	0.46011			0.59993		1.238	0.55531	0.69556	1.0351
					0.67802	0.57238	0.49949	0.51602			0.51317		1.1708	0.97583	0.75652	1.0248
					0.43094	0.45164	0.35966	0.40193			0.51317		0.66463	1.0877	0.92101	0.7314
					0.3217	0.50893	0.3748	0.34844			0.49414		0.62355	0.60105	1.0642	0.64438
					0.29791	0.36469	0.3123	0.31366			0.31384		0.63794	1.1947	0.73384	0.55904
					0.44129	0.35162	0.36829	0.36618			0.3273		0.61039	0.54822	0.40025	0.53292
					0.69773	0.18183	0.28572	0.45238			0.77091		0.49256	0.43041	0.6197	0.45744
					0.39078	0.3595	0.59779	0.48997			0.42247		0.46149	0.4299	1.1603	0.82409
					0.41076	0.3195	0.4927	0.70048			0.621		0.5623	1.4137	0.46147	0.62354
					0.48099	1.1113	0.42042	0.70048			0.46911		0.69098	0.70153	0.2583	0.485
					0.49546	0.98291	0.32723	0.59865			1.4979		0.56595	0.38442	0.39259	0.70788
					0.41387	0.31375	0.37036	0.36663			1.4001		0.48524	0.59076	0.93022	0.47682
					0.4271	0.45275	0.39513	0.53698			0.33019		0.52472	0.4768	0.53186	0.58099
					0.4271	0.46322	0.81583	0.39773			0.3418		0.58421	0.40729	0.50715	0.42812
					0.50364	0.86881	0.54748	0.39901			0.3245		0.65372	0.89227	0.36194	0.66888
					0.42194	0.86881	0.85845	0.28201			0.39079		0.58586	1.4861	0.35113	0.78371
					0.37944	0.46918	0.85845	0.37749			0.57418		0.64124	0.98758	0.32996	0.64137
					0.48977	0.35447	0.57136	0.42833			0.55064		0.60106	0.49643	0.36005	0.51184
					0.40002	0.41596	0.36365	0.38607			0.35891		0.7666	0.48311	0.41417	0.66116
					0.23332	0.25446	0.48094	0.40614			0.64586		0.55779	1.2118	0.46068	0.71614
					0.77098	0.3937	0.5602	0.32008			0.40038		0.7435	0.78337	0.4645	0.5591
					0.48797	0.40102	0.59658	0.32322			0.45426		0.66453	0.60001	0.21445	0.40246
					0.4281	0.4086	0.70302	0.32322			0.51715		0.72515	0.60501	0.37966	0.59361
					0.43407	0.44834	1.3506	0.45419			0.29499		0.61268	0.51765	0.37966	0.52199
					0.48329	0.61998	0.59201	0.53103			0.31205		0.57977	0.6612	0.37966	0.23345
					0.47062	0.72964	0.57513	0.47205			0.38553		0.59799	0.68954	0.55439	0.39773
					0.3156	0.52979	0.38079	0.57868			0.49399		0.5701	0.47152	0.48007	0.48343
					0.38749	0.5508	0.61444	0.49303			0.45032		0.61236	0.39159	0.79715	0.50454
					0.43994	0.51007	0.40078	0.38217			0.41013		0.63558	0.54391	0.93573	0.50454
					0.68256	0.52088	0.51026	0.31515			0.4461		0.67078	0.72234	1.0076	0.79014
					0.64292	0.50773	1.0917	0.2841			0.9219		0.70054	0.61589	1.0076	0.78235
					0.38364	0.50472	0.74644	0.18107			0.48879		0.47876	0.42419	0.36579	0.28858
					0.45131	0.81547	0.29728	0.16226			0.47677		0.58253	0.64453	0.45402	0.40584
					0.50489	0.53031	1.5708	0.36672			0.38294		0.7397	0.8352	0.36851	0.37391
					0.42654	0.5776	1.5097	0.47486			0.40775		0.81027	0.62824	0.55581	0.45689
					0.47079	0.37425	0.80941	0.21793			0.50128		0.76336	0.65427	0.61646	0.45689
					0.20508	0.99223	0.75423	0.21946			0.51787		0.43592	1.0342	0.72048	1.487
					0.60479	0.55619	0.713	0.31695			0.49739		0.42591	0.38178	0.54335	0.41887
					0.59168	0.70259	1.3502	0.28272			0.56957		0.45505	0.38474	0.32482	0.48722
					0.56134	0.45464	0.58183	0.28922			0.61745		0.95039	0.22748	0.33566	0.485
					0.70382	0.6688	0.92072	0.25928			0.36705		0.52653	0.68784	0.5261	0.71256
					0.66507	0.6688	0.57371	0.29629			0.30136		0.65724	0.97451	0.5453	0.70383
					0.2558	0.36936	1.3802	0.30483			0.37844		0.36934	0.96463	1.1825	0.78451
					0.37174	0.44273	0.57127	0.25727			0.58382		0.48423	0.66884	0.66443	0.42783
					0.31764	0.35429	0.54874	0.23939			0.67213		0.45519	0.65706	0.48081	0.84794
					0.43267	0.32023	0.49464	0.4252			0.62693		0.43479	0.75251	0.43465	1.0121
					0.65589	0.37468	0.8255	0.40968			0.36032		0.28516	0.74045	0.42152	0.39107
					0.65589	0.40581	0.71886	0.25245			0.41069		0.42172	0.82231	0.76288	0.48879
					0.82976	0.41904	1.1032	0.30636			0.81811		0.4032	0.47359	0.76288	0.49396
					0.66722	0.4332	0.99486	0.30636			0.81811		0.41784	0.78459	0.47865	0.74346
					0.35851	0.41033	0.54709	0.31445			0.71919		0.33507	0.49836	0.59281	0.60265
					0.38709	0.46496	0.48967	0.28362			0.61706		0.44913	1.0757	0.7309	0.74441
					0.3959	0.27074	0.49733	0.3719			0.33029		0.84827	0.71474	0.69543	0.82656
					0.49377	0.38422	0.60264	0.28236			0.5005		0.61771	0.61528	0.8475	0.56058
					0.34607	0.38968	0.29731	0.31878			0.3884		0.50267	0.58783	0.82287	0.243
					0.37861	0.30614	1.5688	0.20191			0.69515		0.44823	0.50718	0.40338	0.68242
					0.34494	0.38836	1.5688	0.46854			0.6367		0.46092	0.43567	0.50389	0.52284
					0.41063	0.29998	0.4568	0.3541			0.37157		0.52229	1.0211	0.37085	1.0683
					0.51299	0.30022	0.40312	0.37706			0.26317		0.72508	1.0603	0.47488	0.39786
					0.6433	0.28989	0.35254	0.31476			0.53721		0.94327	0.56468	0.39113	0.39306
					0.57698	0.28989	0.64397	0.24766			0.39404		0.52624	0.59829	0.26654	0.89592
					0.74641	0.22107	0.34551	0.22361			0.98952		0.48358	0.32444	0.32645	0.40911
					0.52876	0.35219	0.49314	0.49739			0.48257		0.74385	0.30795	0.30514	0.4807
					0.4779	0.28769	1.1399	0.49739			0.45474		0.80408	0.29627	0.32519	0.46659
					0.35134	0.19828	1.1399	0.23635			0.82682		0.58067	0.48589	0.36407	0.32503
					0.70513	0.2204	0.48682	0.34664			0.93094		0.54771	0.6507	0.3665	0.46965
					0.45521	0.18041	0.39366	0.41825			0.35086		0.67803	0.62375	0.23086	0.35944
					0.42933	0.61993	0.68492	0.28621			0.37052		0.5447	0.60492	0.20723	0.95583
					0.32117	0.21805	0.43479	0.29884			0.53347		0.72338	0.3483	0.27165	0.62083
					0.34557	0.68386	0.72623	0.62066			0.44175		0.45075	0.32304	0.25511	0.3916
					0.35441	0.45822	1.3233	0.29385			0.34522		0.54097	0.45622	0.29572	0.31685
					0.47268	0.67217	1.0538	0.28952			0.62821		0.38557	0.63831	0.33353	0.30343
					0.37302	0.58889	0.92997	0.3602			0.45849		0.68642	0.5224	0.29559	0.5028
					0.49059	0.44184	0.74746	0.34949			0.34831		0.70581	0.61922	0.41887	0.38993
					0.38135	0.35047	0.67815	0.38496			0.46902		0.4284	0.65522	0.33273	0.39239
					0.38612	0.43275	0.6295	0.4743			0.42214		0.5325	0.54252	0.18388	0.41507
					0.31467	0.3776	0.31069	0.30449			0.42214		0.40911	0.56037	0.18388	0.69763
					0.4558	0.3776	0.29592	0.21529			0.39213		1.24	0.75837	0.17187	0.53252
					0.54613	0.33913	1.0072	0.54969			0.71437		0.46752	0.69402	0.619	0.46956
					0.62328	0.46599	0.81702	0.5415			0.826		0.72805	0.7929	0.35364	0.6755
					0.34529	0.32003	0.58922	0.41529			0.49549		0.3507	0.93408	0.42581	0.37565
					0.38072	0.27715	0.61502	0.37193			0.49372		0.73738	1.1769	0.39055	0.90428
					0.37986	0.30026	0.57971	0.48632			0.55677		0.46038	1.3381	0.518	0.34486
					0.43521	0.32255	0.36725	0.39823			0.39359		0.59376	0.76673	0.30012	0.53537
					0.77636	0.32255	0.28938	0.39823			0.38946		0.45211	1.0186	0.70933	0.4458
					0.47033	0.25379	0.72197	0.40146			0.38913		0.53862	0.84888	0.63819	0.3861
					0.49367	0.27914	0.31028	0.29118			0.46203		0.35051	1.0031	0.46363	0.37241
					0.54388	0.37181	0.18777	0.2597			0.44056		0.59775	0.8909	0.7842	0.37241
					0.41651	0.31042	0.54884	0.77097			0.45269		0.37723	0.78177	0.33742	0.29413
					0.41702	0.40038	0.24557	0.24497			0.82595		0.38793	1.0718	1.21	0.54466
					0.4115	0.28611	0.31312	0.4863			0.56695		0.43766	1.0703	0.26438	0.6443
					0.33242	0.25648	0.28459	0.47786			0.30462		1.0999	1.0409	0.60308	0.64401
					0.34747	0.29388	0.44418	0.62135			0.48341		0.44524	0.91401	1.2916	0.84534
					0.36895	0.35508	0.43574	0.60857			0.52114		0.64182	1.0064	0.68063	0.39565
					0.38563	0.35508	0.48469	0.45191			0.58262		0.72231	2.1598	1.3359	0.46313
					0.28323	0.18891	0.65723	0.23797			0.49907		0.72231	0.59666	1.1501	0.9877
					0.44524	0.49195	0.59697	0.36047			0.53083		0.50418	0.80063	1.2608	0.71853
					0.92165	0.25421	0.10521	0.36937			0.53557		0.66036	0.72715	0.65613	0.37656
					0.96691	0.28153	0.14285	0.34462			0.47602		0.34161	0.62703	1.0021	0.44945
					0.22718	0.30828	0.56167	0.50515			0.56993		0.49257	3.073	0.96063	1.1804
					0.35331	0.33515	0.29506	0.3979			0.53014		0.74701	0.96481	1.2389	0.36452
					1.0924	0.55236	0.2219	0.27951			0.31679		0.57882	0.76009	1.1103	0.44668
					1.1481	0.39625	0.15915	0.6463			0.72916		0.53258	1.7824	0.69627	0.83597
					0.36056	0.48382	0.18907	0.31596			0.50104		0.55979	1.4886	1.732	0.80258
					0.40367	0.54903	0.24809	0.3411			0.32348		0.53126	0.92499	0.83028	0.60413
					0.44415	0.25277	0.29168	0.39738			0.30882		0.53126	1.2075	0.91017	0.67353
					0.44436	0.56697	0.12436	0.4036			0.72946		0.5493	1.5874	1.1498	0.68926
					0.64517	0.44874	0.31313	0.40543			0.43824		0.8289	0.77779	0.52028	0.4916
					0.55536	0.45058	0.28989	0.35945			0.26367		0.48047	0.87888	0.74147	0.4916
					0.39575	0.51327	0.1721	0.31537			0.53138		0.43832	0.4185	0.98339	0.35303
					0.34173	0.52257	0.17984	0.8253			0.4521		0.4428	0.64696	1.0691	0.52286
					0.34013	0.14575	0.57258	0.77468			0.63284		0.49536	0.59867	1.0494	0.44545
					0.40062	0.30406	1.256	0.46544			0.73922		0.31827	0.80824	0.54288	0.46761
					0.59725	0.33871	0.40153	0.31047			0.7396		0.42332	0.82008	0.79536	0.59683
					0.34677	0.35015	0.78878	0.72962			0.64219		0.32021	1.27	1.2465	0.97932
					0.54051	0.35015	0.47693	0.40043			0.58514		0.49957	1.2023	1.0061	0.54245
					0.68022	0.35358	0.5455	0.35406			0.90484		0.37907	0.91795	1.428	0.64527
					0.16733	0.46098	0.44973	0.39751			0.47126		0.51801	0.67093	1.421	0.51193
					0.20583	0.43345	0.41941	0.87142			0.39449		0.39466	0.93967	0.96162	1.0718
					0.44873	0.31961	0.28517	0.54282			1.3177		0.67133	1.3523	0.80081	0.54959
					0.54373	0.56437	0.92899	0.44611			0.32833		0.75847	0.68173	0.73709	0.93998
					0.84675	0.4478	0.35299	0.39201			0.99405		0.69634	2.3986	0.73709	0.55066
					0.72818	0.35388	0.48523	0.44037			0.53121		0.6583	1.0713	0.79819	0.43081
					0.36157	0.54035	0.2402	0.40804			0.41002		0.35827	0.48487	0.63475	0.80619
					0.19005	0.54035	0.31877	0.32986			0.75792		0.29201	0.58934	0.44338	1.0108
					0.5019	0.46182	0.25893	0.38983			0.74604		0.4895	0.36401	0.46089	0.45985
					0.41263	0.27026	0.57561	0.45254			0.67138		0.66124	0.55256	0.90658	0.3889
					0.40756	0.20761	0.43495	0.51302			0.32598		0.47715	0.44637	0.96635	0.90401
					0.40756	0.3722	0.22019	0.31146			0.83295		0.31371	0.45755	0.39523	0.78628
					0.4043	0.42925	0.61208	0.3778			0.44527		0.29793	0.52601	1.0219	0.31993
					0.52078	0.47492	0.62611	0.30466			0.24968		0.34588	0.52213	0.80533	0.70213
					0.48409	0.34178	0.21953	0.4215			0.46367		0.36382	0.57136	0.70558	0.48634
					0.52341	0.36629	0.42924	0.36581			0.38663		0.67711	0.71595	0.88584	0.48829
					0.42709	0.35062	0.36	0.41806			0.2723		0.40153	0.65889	0.91229	0.5063
					0.45981	0.49944	0.35533	0.55437			0.3893		0.47692	0.53168	0.7719	0.49789
					0.2362	0.42001	0.40986	0.41955			0.48017		0.5309	0.82032	0.31885	0.54465
					0.33797	0.43845	0.23276	0.59205			0.35405		0.57374	0.84423	1.2273	0.58726
					0.32981	0.25883	0.56765	0.99001			0.66065		0.61506	0.5366	0.68744	0.49256
					0.37753	0.49077	0.24866	0.36161			0.76268		0.53229	0.55225	0.48133	0.48834
					0.42111	0.55951	0.40218	0.48265			0.69765		0.74315	1.1455	0.56511	0.30469
					0.58748	0.54244	0.22756	0.38795			0.72561		0.63231	1.0683	1.1362	0.40811
					0.58748	0.40834	0.25057	0.89514			0.72561		0.5509	0.59428	1.3035	0.31232
					0.63595	0.22148	0.65866	0.47357			0.46895		0.5509	0.88973	0.81903	0.31232
					0.72449	0.64497	0.15774	0.45645			0.46895		0.2527	0.85746	1.1011	0.29182
					0.33348	0.58067	0.50326	0.60675			0.37824		0.44962	0.47315	0.78147	0.29182
					0.29251	0.47685	0.42328	0.76246			0.3338		0.22319	0.5751	0.88788	0.29182
					0.34541	0.50551	0.25946	0.45393			0.55577		0.62838	1.5063	0.92168	0.51543
					0.34337	0.50551	0.45585	0.72013			0.54816		0.55247	0.65142	0.92168	0.42417
					0.43608	0.4153	0.66184	0.37103			0.45651		0.52282	1.0826	0.50802	0.40431
					0.30983	0.39697	0.81026	0.57904			0.70286		0.82713	0.68302	0.91473	0.34541
					0.34461	0.54664	1.2925	0.81037			1.121		0.56706	1.0689	1.1035	1.0765
					0.26655	0.35789	0.4089	0.59309			0.50179		0.4433	0.47818	0.69394	0.35125
					0.31005	0.59103	0.25673	0.44073			0.64567		0.35502	0.45918	0.76639	0.35775
					0.22726	0.59314	0.28193	0.39448			0.7236		0.38189	0.55788	0.48729	0.31157
					0.21468	0.38152	0.16995	0.67047			1.1305		0.50156	0.71065	0.53416	0.37684
					0.29152	0.77805	0.63759	0.66655			1.1079		0.45994	0.64198	0.4232	0.28065
					0.37389	0.46145	0.62337	0.75674			0.43765		0.83331	0.53522	1.3631	0.39266
					0.64439	0.41072	0.81316	0.70852			0.30674		0.74772	0.40118	0.5297	0.46371
					0.49111	0.41207	0.50583	0.73742			0.74661		0.74772	0.69573	1.0423	0.77054
					0.46435	0.28107	0.53802	0.56686			0.42169		0.69625	0.49655	1.2342	0.78093
					0.30436	0.3567	0.42672	0.5016			0.50014		0.54485	0.52858	0.66678	0.84607
					0.59458	0.31946	0.70952	0.5016			0.48293		0.56674	0.56216	0.76806	1.0754
					0.37209	0.35228	0.81764	0.45193			0.819		0.46394	0.79765	1.2915	0.52643
					0.39317	0.47626	0.39923	0.36999			0.38926		0.55843	0.91368	0.55941	0.94038
					0.23079	0.74681	0.54735	0.42301			0.44489		0.87049	0.98512	0.57322	0.80385
					0.31163	0.31572	0.32511	0.46699			0.58817		0.56587	1.2748	0.74408	0.69458
					0.31163	0.31129	0.64714	0.40432			0.43009		0.48487	0.70938	0.85352	0.57301
					0.3573	0.56342	0.32663	0.63195			0.4799		0.48921	1.0187	0.73139	1.8798
					0.51343	0.40091	0.50285	0.64559			0.40845		0.72202	1.0248	0.6663	0.90161
					0.41884	0.44016	0.53958	0.84538			0.57347		0.71092	0.74654	0.62424	0.95227
					0.38142	0.49971	0.49585	0.43965			0.4544		0.85498	0.6073	1.2699	0.96751
					0.50085	0.36118	0.48997	0.486			0.47043		0.7206	0.76616	1.2699	0.9213
					0.46972	0.38911	0.3905	0.3719			0.47141		0.74795	0.76616	0.56454	0.77493
					0.46972	0.70346	0.29316	0.55662			0.43706		0.66606	1.448	0.76633	1.0609
					0.44451	0.66602	0.39228	0.55195			0.47251		0.76548	0.6577	1.1295	0.79855
					0.66858	0.61632	0.46366	0.55195			0.4822		0.68263	0.88804	0.91681	1.1343
					0.33365	0.34672	0.48452	0.39814			0.56173		0.73859	0.83016	0.82413	1.0779
					0.31545	0.34367	0.42018	0.32577			0.97369		0.64114	0.68193	1.0183	1.4652
					0.31586	0.40889	0.36618	0.34058			0.93638		0.63521	0.82247	1.2956	1.008
					0.41165	0.2485	0.44884	0.34997			0.78348		0.47112	0.73845	1.2901	2.0604
					0.3708	0.33958	0.46144	0.59368			0.36766		0.50819	0.65399	0.96478	1.4001
					0.71945	0.29242	0.46144	0.65093			1.4535		0.6233	0.48917	0.96147	1.1271
					0.31115	0.15712	0.40644	0.49721			0.66007		0.54515	0.87465	0.95035	0.73371
					0.31592	0.43577	0.21379	0.42389			0.69963		1.0801	0.70985	0.69678	1.1181
					0.30738	0.38962	0.3748	0.43158			0.5488		0.58889	0.70985	0.68382	1.2043
					0.24429	0.32948	0.33924	0.4998			0.52302		0.78502	0.36524	0.61621	0.96276
					0.33817	0.2481	0.46915	0.37299			0.44719		0.79621	1.1086	1.2357	0.72809
					0.33817	0.55832	0.32943	0.40612			0.40307		0.64828	0.7314	1.3236	0.65546
					0.25361	0.55522	0.1981	0.74821			1.0094		0.67491	0.99373	1.3236	1.8096
					0.44105	0.49333	0.47008	0.37854			0.47785		1.0566	0.96512	1.2769	0.89027
					0.21367	0.20855	0.24984	0.3849			0.38991		1.0702	0.5487	0.88041	0.75192
					0.34428	0.38633	0.29023	0.33819			0.52016		0.4026	1.2642	0.64979	1.4334
					0.31812	0.24605	0.35414	0.33738			0.54095		0.94823	1.4813	0.75142	1.2744
					0.469	0.58526	0.44605	0.49145			1.1315		0.79089	0.9452	1.2089	0.85757
					0.54319	0.63315	0.40151	0.34281			0.71606		0.42589	1.6067	1.0789	0.72836
					0.3999	0.30529	0.34826	0.4334			0.44499		0.42616	0.80803	0.78869	1.0306
					0.4779	0.30529	0.4929	0.37721			0.56538		0.79006	1.5681	1.0999	0.91409
					0.46264	0.21384	0.48416	0.33355			0.92006		0.39483	0.6189	0.7307	0.90531
					0.24669	0.47909	0.60032	0.41289			0.65746		0.6924	1.525	0.58446	1.1444
					0.31665	0.4308	0.51251	0.25641			0.55339		0.53113	1.5061	0.31446	0.87896
					0.32267	0.16993	0.41751	0.46187			0.49463		0.69598	0.97238	0.6181	0.89915
					0.30982	0.19718	0.53745	0.72672			0.60699		0.73748	1.2213	0.54753	1.0631
					0.25956	0.57186	0.39687	0.40884			0.3976		0.76958	1.0591	0.76864	1.255
					0.37046	0.54641	0.41665	0.75514			0.45572		0.6261	0.79457	0.86344	1.4764
					0.28105	0.26194	0.37113	0.85579			0.34537		0.71819	0.59717	1.6508	1.6169
					0.50365	0.46667	0.39156	0.75976			0.66079		0.88936	2.0114	1.0471	1.4582
					0.55953	0.30924	0.46459	0.41963			0.58641		0.39918	0.57022	0.30107	1.1764
					0.44372	0.40015	0.29433	0.52341			0.37047		0.8287	1.2539	0.47644	1.387
					0.2993	0.4147	0.30573	0.49151			0.37047		0.5833	0.65953	0.35957	0.80191
					0.50647	0.31704	0.38002	0.37			0.94559		0.47612	0.49875	0.76746	0.97636
					0.45834	0.25683	0.52934	0.33189			0.46266		1.1134	1.4391	0.82977	1.167
					0.27457	0.54889	0.5537	0.69722			0.60252		1.0352	1.0075	0.58587	1.3217
					0.43543	0.41691	0.40269	0.76182			0.28636		0.85505	0.93129	0.45978	1.366
					0.4977	0.20015	0.63334	0.58977			0.2972		0.90233	0.45937	0.55922	0.99058
					0.43728	0.3252	0.3925	0.35136			0.98197		0.58791	1.0285	0.38282	0.92386
					0.17218	0.26135	0.39243	0.46916			0.41764		0.58791	0.54513	0.3264	0.77671
					0.31798	0.35351	0.47661	0.57331			1.2479		0.4159	0.89257	0.44217	1.3335
					0.32568	0.34391	0.62563	0.25208			1.1827		0.57962	0.89568	0.44462	1.4288
					0.35686	0.38299	0.36524	0.24441			0.40927		0.70132	0.58758	0.44462	1.2698
					0.28302	0.35271	0.51029	0.43609			0.43905		0.65212	1.0413	0.74179	1.2698
					0.28388	0.40996	0.37681	0.58529			0.48654		0.74487	0.77091	0.54939	1.1419
					0.31402	0.3689	0.31735	1.09			0.61584		0.54014	1.0498	0.4389	0.79755
					0.28682	0.26128	0.58548	1.0119			0.58412		0.44421	0.45348	0.35645	1.6153
					0.33483	0.48383	0.31649	0.3293			0.6018		0.72519	0.58706	1.5277	1.5578
					0.31578	0.79438	0.2609	0.52044			0.66902		0.71822	0.57646	0.67591	1.0464
					0.20805	0.51839	0.35245	0.32812			0.35339		0.85969	0.42778	0.51126	0.79102
					0.56501	0.24071	0.41511	0.40843			0.57702		0.70166	0.42778	0.6062	0.70341
					0.56501	0.27433	0.33759	0.47306			0.57097		0.80873	0.43673	0.56333	1.1055
					0.34255	0.48732	0.32777	0.47306			0.52356		1.1072	0.79723	0.46282	0.87272
					0.36278	0.50491	0.33034	0.49254			0.6018		0.74591	0.40269	0.62439	0.95942
					0.27704	0.32864	0.51984	0.49254			0.52727		0.70214	0.35512	0.66743	0.96988
					0.26124	0.64494	0.56262	0.81202			0.36531		0.90711	0.59238	0.8322	1.4769
					0.59546	0.56659	0.27573	0.36631			1.0701		0.86354	0.81114	0.35241	1.1257
					0.26917	0.56845	0.5333	0.41678			0.9519		0.54471	0.61994	0.67183	1.4616
					0.74715	0.43329	0.67835	0.4495			0.51164		1.5812	0.76874	0.65221	1.399
					0.31851	0.379	0.42602	0.28216			0.44186		0.61886	0.55858	0.50636	0.7319
					0.33649	0.24302	0.54308	0.38763			0.47175		0.75138	0.96373	0.47584	0.6688
					0.34149	0.16919	0.54379	0.51063			0.74939		0.75138	0.68707	0.57326	1.0976
					0.28801	0.41955	0.36861	0.52058			0.60642		0.95336	0.42232	0.87033	1.2622
					0.34544	0.33165	0.37483	0.55635			0.75492		0.79606	0.93839	0.53772	1.3146
					0.30864	0.48587	0.34173	0.3121			0.39286		0.72604	0.4917	0.59719	0.93887
					0.32915	0.24951	0.63477	0.32451			0.54712		0.71063	1.1397	0.64507	0.98536
					0.27519	0.53608	0.59369	0.37071			0.53421		1.2145	1.3888	0.52511	0.813
					0.22517	0.51142	0.98063	0.34069			0.61901		1.1113	0.4945	0.83253	0.87897
					0.43344	0.65284	0.57236	0.28508			0.64928		0.4523	0.66313	0.30961	0.99547
					0.35342	0.57281	0.44883	0.39267			0.51044		1.0176	0.33284	0.29196	0.87923
					0.42008	0.34232	0.4264	0.44582			0.57161		0.88159	0.28455	0.27647	0.76115
					0.51322	0.42158	0.47804	0.46722			0.48064		1.0264	0.51554	0.64309	0.67203
					0.36923	0.29684	0.48136	0.31885			0.86166		0.96071	0.46246	0.49629	0.98176
					0.4667	0.39649	0.63875	0.31554			0.8072		1.5514	0.57429	0.55752	0.62925
					0.52082	0.39951	0.57459	0.34147			0.8072		0.89243	0.57429	0.47046	0.65384
					0.23035	0.48453	0.56906	0.30931			0.43676		1.0968	0.38866	0.62551	0.60337
					0.50735	0.45729	0.3145	0.29193			0.41324		0.5315	0.35688	0.53128	1.575
					0.3312	0.7358	0.69868	0.65833			0.31619		0.50842	0.50742	0.77887	1.2054
					0.30242	0.68707	0.3083	0.36861			0.70914		0.50707	0.31771	0.69291	0.71234
					0.26442	0.56222	0.45265	0.46046			0.66053		1.2827	0.67857	0.99754	1.1899
					0.35298	0.42897	0.26849	0.55747			0.69643		0.81055	0.60909	0.65977	1.0169
					0.34946	0.40573	0.33785	0.58966			0.49291		0.98962	0.50561	0.85894	1.272
					0.36224	0.46109	0.54154	0.4965			0.34737		0.69835	0.32988	0.80616	0.83515
					0.58159	1.2015	0.36825	0.31761			0.32021		1.0209	0.33508	0.7411	1.0698
					0.4932	0.42989	0.70665	0.31151			0.3388		0.62664	0.47571	0.63722	1.0887
					0.4932	0.71651	0.30284	0.3313			0.70229		0.56855	0.71735	1.2239	1.0432
					0.53193	0.51071	0.68268	0.31168			0.2283		0.42884	0.78708	1.119	1.385
					0.30869	0.39225	0.81346	0.54088			0.51387		0.93458	0.42691	0.50777	1.1889
					0.37705	0.74407	0.30283	0.23468			0.44513		0.93389	0.52528	0.59376	0.73775
					0.42642	0.70776	0.4519	0.53268			0.46639		0.95697	0.38584	0.59376	1.0016
					0.42642	0.70776	0.38112	0.54627			0.46639		0.66423	0.52139	0.80885	0.74197
					0.61976	0.47507	0.36082	0.61113			0.44309		0.67617	0.49068	0.57181	0.8317
					0.46554	0.22461	0.6616	0.47235			0.3347		0.57551	0.47659	0.45828	0.78141
					0.30576	0.85761	0.71124	0.47405			0.32533		0.47996	0.69075	0.65109	0.66226
					0.46151	0.37087	0.47083	0.50538			1.1885		0.56573	0.62204	0.59855	0.83198
					0.58986	0.88823	0.48444	0.56182			0.38362		0.35582	0.56959	0.51668	0.83198
					0.5876	1.5201	0.62122	0.4816			0.73565		0.56472	0.60638	0.49134	1.1978
					0.40055	0.41472	0.59688	0.44414			0.27256		0.5313	0.54405	0.62309	0.45006
					0.36101	0.68514	0.47859	0.49391			0.49005		1.0307	1.1218	0.49931	0.92444
					0.29695	0.36788	0.54254	0.51063			0.44261		0.86045	0.47594	0.56316	0.95704
					0.25346	0.32353	0.49025	0.25616			0.3168		0.86045	0.91133	0.6309	1.1965
					0.25749	0.38198	0.49752	0.23239			0.34829		1.6263	0.65034	0.64456	1.2
					0.25173	0.38198	0.54595	0.26918			0.36137		0.40145	0.38255	0.3951	0.60349
					0.20779	0.42196	0.44047	0.57888			0.39125		1.312	0.37952	0.36386	0.89763
					0.3573	0.58692	0.31449	0.24749			0.43353		0.59672	0.91122	0.50914	0.85845
					0.3573	0.4719	0.38331	0.36726			0.26956		0.65976	0.6011	1.074	0.69599
					0.24436	0.45427	0.47211	0.42421			0.56072		0.75487	0.74446	1.3598	0.71321
					0.58773	0.64395	0.44623	0.37562			0.76358		1.1516	0.70371	0.75367	1.3614
					0.4798	0.31728	0.41225	0.25866			0.35728		1.0192	0.63555	0.63016	1.4459
					0.24395	0.76373	0.36621	0.41782			0.68076		0.84382	0.64271	0.66983	1.3351
					0.19933	0.54439	0.29345	0.32904			0.37228		0.81084	1.2639	0.49723	0.64588
					0.22819	0.91842	0.63693	0.48527			0.37275		0.63467	0.56105	1.004	1.2959
					0.21469	0.981	0.33463	0.42493			0.49469		0.58115	1.112	0.61437	0.6538
					0.34047	1.1301	0.34246	0.29747			0.53255		0.79987	0.78797	0.78031	0.65511
					0.2604	0.88126	0.41833	0.69257			0.45412		0.69703	1.7456	0.76599	0.66512
					0.26767	0.34592	0.56839	0.45351			0.41261		0.4467	0.63366	0.65105	0.56805
					0.27675	0.94435	0.45024	0.29536			0.33764		0.96784	0.56407	0.38212	0.9626
					0.20412	0.58771	0.39017	0.348			0.53837		0.81339	0.62265	0.53965	0.95945
					0.29854	0.42049	0.31933	0.28912			0.46322		0.76141	0.70301	0.68882	0.72649
					0.29159	0.70171	0.40453	0.4522			0.4452		0.6437	1.0693	1.5074	0.49247
					0.25234	0.98252	0.69397	0.49383			0.91087		0.52637	0.57995	0.47806	0.69885
					0.28145	0.80671	0.34959	0.30248			0.29062		0.52031	0.9657	0.44889	1.1402
					0.38322	0.65083	0.34774	0.26306			0.22348		1.1571	0.59702	1.066	0.97229
					0.3013	0.24015	0.39016	0.22698			0.40829		0.59798	0.46767	0.40246	1.0081
					0.15757	0.27546	0.38456	0.53205			0.22321		0.63523	0.64913	0.83971	0.64753
					0.17623	0.29461	0.39434	0.44378			0.37203		0.53137	0.43404	0.44474	0.82687
					0.15725	0.29759	0.33785	0.46244			0.35259		0.48674	0.37139	0.56845	0.82687
					0.19452	0.32476	0.35623	0.2818			0.30548		0.61923	1.0319	0.95261	0.84497
					0.15034	0.30972	0.37844	0.52652			0.28501		0.5326	0.54717	0.72	0.89284
					0.13767	0.41586	0.25566	0.45622			0.53172		0.91952	0.29524	0.72	0.89284
					0.16375	0.43931	0.39106	0.47638			0.57372		1.0532	0.3053	0.553	0.79115
					0.19954	0.24235	0.4757	0.69925			0.25541		0.94575	0.66757	0.67731	0.60914
					0.33733	0.33854	0.56374	0.1973			0.28838		0.70335	0.54926	0.87324	1.1658
					0.19524	0.19387	0.3834	0.35161			0.63351		1.1045	0.75942	0.58748	1.0504
					0.232	0.22795	0.49322	0.31823			0.41652		0.72051	0.68172	0.49294	0.81164
					0.16901	0.20489	0.40549	0.24756			0.41652		0.39341	0.58927	1.0968	1.2824
					0.20593	0.36316	0.22618	0.34803			0.41652		0.53913	0.53643	1.1764	1.3386
					0.21564	0.5257	0.37046	0.32499			0.2416		0.42154	0.54359	0.73879	1.0557
					0.24407	0.5257	0.39185	0.23859			0.74922		0.83851	0.44345	0.63436	0.43749
					0.229	0.37601	0.38424	0.37359			0.74922		0.70069	0.76319	0.57119	1.4687
					0.229	0.31867	0.35424	0.21607			0.23081		0.73197	0.4119	0.42712	1.5248
					0.12362	0.25853	0.31389	0.28304			0.28275		0.71698	0.47789	1.8507	0.7894
					0.17446	0.39196	0.30303	0.41738			0.27995		0.52003	0.46585	1.3604	0.75306
					0.17262	0.24143	0.30303	0.3846			0.41609		0.87408	0.73263	0.98104	0.77705
					0.38265	0.23789	0.38098	0.35954			0.37004		0.87408	0.7452	0.89842	0.58133
					0.29648	0.21582	0.24597	0.48169			0.44617		0.68766	0.74069	1.0355	0.78215
					0.33577	0.49298	0.34483	0.27795			0.41977		0.54404	1.6083	0.63319	0.43798
					0.43904	0.45072	0.41728	0.42777			0.35218		1.0117	1.4076	1.5234	0.72807
					0.26418	0.21492	0.31067	0.645			0.29766		0.92563	0.65935	0.56433	0.79257
					0.69401	0.28076	0.78231	0.46262			0.46809		0.81366	0.58205	0.54546	0.77164
					0.6823	0.32668	0.55937	0.34303			0.28998		0.49973	1.4879	1.4844	0.7263
					0.6937	0.35151	0.60439	0.46867			0.2901		1.0374	0.86128	0.87556	0.92432
					0.47379	0.30957	0.76968	0.39715			0.39148		0.36183	1.0727	1.1047	0.50485
					0.3675	0.2523	0.58124	0.39715			0.51643		0.39337	0.75033	0.56739	0.91085
					0.27109	0.21229	0.33371	0.43298			0.26093		0.77669	1.382	0.85966	1.2721
					0.46172	0.40143	0.37278	0.26413			0.48159		0.5497	1.3081	0.87065	0.83615
					0.33523	0.3126	0.35888	0.39884			0.45154		0.54174	0.87438	0.89327	0.90407
					0.37909	0.35221	0.38743	0.67923			0.44093		0.62283	0.65048	0.75728	1.3017
					0.27274	0.44066	0.27255	0.28209			0.45697		0.69165	0.70605	0.66891	1.2349
					0.2155	0.26744	0.23744	0.28936			0.48625		0.84084	0.77691	0.64842	1.6081
					0.30579	0.2091	0.31073	0.35405			0.36457		0.57585	0.70424	0.7268	1.2939
					0.20435	0.32811	0.27787	0.36807			0.56595		0.59575	1.2	1.7655	1.1425
					0.27452	0.48841	0.60701	0.52179			0.55267		0.63208	1.0946	1.6131	0.65817
					0.40856	0.23029	0.48054	0.56584			0.36492		0.32904	0.63984	1.4801	1.1331
					0.29541	0.33356	0.38909	0.39527			0.92301		0.8036	0.68675	1.6979	0.47119
					0.33155	0.25283	0.36277	0.23055			0.5055		0.47549	0.68675	0.57477	0.68775
					0.21678	0.39552	0.36277	0.30508			0.46672		0.86987	0.88933	0.65991	0.51379
					0.53807	0.38423	0.27799	0.33667			0.48047		1.023	0.88933	0.59352	0.6747
					0.50353	0.42395	0.27948	0.36205			0.48047		1.0305	0.7188	0.98803	1.07
					0.40582	0.46153	0.59621	0.36205			0.29706		1.0469	0.7188	0.70897	0.90529
					0.30827	0.37332	0.62853	0.34077			0.32894		0.51862	0.65072	1.4679	0.7789
					0.29824	0.40104	0.28301	0.3367			0.39862		0.5625	0.71872	0.69852	1.2763
					0.28998	0.40899	0.48126	0.30182			0.35019		0.62697	0.80034	0.74535	1.0176
					0.458	0.34029	0.45497	0.42073			0.35019		0.62445	0.56992	0.81778	0.88384
					0.32122	0.34771	0.29796	0.45301			0.31888		0.66269	0.42288	0.81589	0.98144
					0.35994	0.77832	0.36326	0.62849			0.32741		1.0229	0.56622	1.6803	1.2196
					0.29585	0.29352	0.22911	0.38253			0.36097		0.73895	0.55215	0.35832	0.50128
					0.4092	0.37812	0.43825	0.35208			0.43622		0.77615	0.64306	0.50009	0.9464
					0.35481	0.34082	0.2851	0.2914			0.41526		0.58494	0.65396	0.24862	0.95651
					0.79484	0.34082	0.32736	0.48377			0.42387		0.74367	0.70411	0.75701	0.8305
					0.40642	0.31772	0.30513	0.47896			0.37046		0.52901	0.29408	0.73875	0.24235
					0.36118	0.4555	0.36225	0.58286			0.37045		0.8214	0.5685	0.55327	0.41312
					0.26639	0.43489	0.49007	0.72108			0.33919		0.77981	0.52406	0.5043	0.41312
					0.39255	0.33387	0.55847	0.72108			0.29053		0.43353	0.36684	1.5477	0.89042
					0.56992	0.4854	0.46242	0.39422			0.33981		0.42277	0.29434	0.71136	0.31912
					0.45916	0.32863	0.20194	0.16501			0.40401		1.4042	0.44218	0.41383	0.93946
					0.51437	0.31555	0.23386	0.51958			0.42224		0.86203	0.38211	1.6311	0.45307
					0.44834	0.3569	0.33174	0.4488			0.4152		0.44244	1.1381	0.96519	0.9959
					0.30341	0.61977	0.23461	0.40713			0.26169		0.71609	0.93632	1.0234	1.504
					0.27092	0.56216	0.23871	0.35891			0.47099		0.43006	0.97653	1.0899	0.78871
					0.54678	0.38406	0.25947	0.23634			0.53438		0.52607	0.76805	0.81206	1.5144
					0.4139	0.37985	0.27343	0.3413			0.5324		0.7017	0.31613	0.68847	2.3778
					0.42563	0.35579	0.7081	0.31055			0.59652		1.1486	0.5826	0.59438	0.45147
					0.35338	0.43759	0.29599	0.21773			0.566		0.43747	0.5128	0.73076	0.78635
					0.27799	1.0132	0.5503	0.86691			0.32454		0.40873	0.65012	0.75012	0.7041
					0.3345	0.78726	0.29308	0.1898			0.51575		0.50229	0.51455	0.51085	0.91827
					0.37045	1.1671	0.3311	0.32067			0.39716		0.53086	0.60059	0.25622	1.059
					0.37045	0.58871	0.94041	0.35264			0.33966		0.56547	1.0427	0.26342	0.48556
					0.42428	0.70384	0.46703	0.34835			0.23759		0.44848	0.95425	0.37036	0.89535
					0.47622	0.39489	0.44398	0.345			0.70636		0.51185	0.84882	1.3659	0.84566
					0.44432	0.22744	0.25977	0.379			0.39199		0.49294	1.0577	1.3659	0.80085
					0.55016	0.33451	0.18437	0.22836			0.54758		0.67012	0.6946	1.0473	0.65861
					0.26252	0.24807	0.46052	0.61505			0.47202		0.79472	0.99616	0.47596	1.0954
					0.26252	0.24868	0.31344	0.5861			0.25606		0.62835	0.90224	0.27717	1.0324
					0.4237	0.48109	0.29776	0.36076			0.35998		0.8619	0.72735	0.42707	0.71662
					0.2332	0.31358	0.36631	0.30739			0.39884		0.49582	0.60345	0.27389	1.0784
					0.23951	0.46142	0.37576	0.4978			0.46078		0.47289	0.60345	0.40889	1.0841
					0.75887	0.35191	0.29015	0.33826			0.29467		0.38327	0.58145	0.45031	0.76635
					0.33222	0.5094	0.31367	0.32645			0.36873		0.90639	0.38322	0.42902	1.2674
					0.45093	0.63812	0.37481	0.34023			0.32194		0.55858	0.6929	0.83297	1.2674
					0.61007	1.1922	0.44242	0.27487			0.34146		0.54986	0.71012	0.34644	1.0824
					0.34699	0.60974	0.31548	0.28931			0.4474		0.49337	0.54279	0.63431	0.73044
					0.70753	0.69355	0.5605	0.50951			0.30735		0.45034	0.42198	1.0409	0.67631
					0.38678	0.62386	0.50663	0.44393			0.34517		0.45948	0.40131	1.1352	0.80116
					0.34646	0.38417	0.50663	0.44393			0.38319		0.53351	0.40129	0.70504	1.3955
					0.33495	0.27842	0.50541	0.48208			0.34475		0.89236	0.7494	0.895	1.3683
					0.40422	0.58231	0.33169	0.81315			0.32586		0.50482	0.59123	1.4966	1.98
					0.34896	0.49146	0.31283	0.41006			0.64588		0.56387	0.59123	0.39412	1.1842
					0.29859	0.47996	0.32164	0.45892			0.61002		0.33095	0.53998	0.33133	0.68336
					0.31806	0.55467	0.55111	0.55499			0.28599		0.52492	0.53998	0.31347	0.6571
					0.36512	0.23427	0.3202	0.42078			0.28482		0.51207	0.6207	0.46249	1.0508
					0.36314	0.28461	0.61663	0.41029			0.3337		0.38271	0.56003	0.5596	1.1336
					0.3591	0.39982	0.34117	0.55433			0.58365		0.83704	0.78906	0.52802	1.3941
					0.30147	0.43339	0.22238	0.30211			0.47242		0.76048	0.72803	0.81958	0.90522
					0.70798	0.26186	0.31632	0.65303			0.33773		1.1755	0.92216	0.77798	0.61424
					0.31895	0.47641	0.55214	0.44645			0.39081		0.32258	0.83145	0.64739	0.59818
					0.39913	0.33728	0.51592	0.45025			0.39023		0.72904	0.77281	0.40731	0.43382
					0.31452	0.29432	0.46846	0.34233			0.39023		0.75006	0.63973	0.48685	0.56992
					0.59391	0.38016	0.39578	0.31261			0.33347		0.72738	0.92091	0.61038	0.72981
					0.44079	0.32505	0.61974	0.30419			0.3056		0.59901	0.12845	0.55526	1.4387
					0.44079	0.27063	0.2916	0.28743			0.3165		0.4508	0.18562	0.50933	0.71218
					0.60085	0.26122	0.46802	0.24091			0.41414		0.64658	0.4218	0.37983	0.68617
					0.31507	0.23237	0.23793	0.22418			0.32462		0.5406	0.31289	0.36	0.86083
					0.35079	0.2694	0.30284	0.3262			0.30555		0.90187	0.2752	0.31787	1.0445
					0.69076	0.2753	0.26727	0.29642			0.38407		0.38133	0.31887	0.28474	1.2001
					0.44933	0.1786	0.30949	0.31453			0.37612		0.38798	0.32783	1.0348	0.8437
					0.56582	0.44006	0.30949	0.46228			0.39984		0.38798	0.29078	0.55318	1.152
					0.58152	0.22678	0.32301	0.41352			0.33603		0.54983	0.33445	0.54482	1.4934
					0.29439	0.18076	0.31454	0.39153			0.29727		0.59776	0.57039	0.46193	1.43
					0.40486	0.34444	0.28277	0.27475			0.5055		0.34053	0.41473	0.51619	1.2059
					0.44375	0.28104	0.32177	0.3628			0.41883		0.71743	0.38509	0.34797	1.7727
					0.33852	0.23953	0.32177	0.60129			0.33999		0.85471	0.39586	0.58587	0.70253
					0.3246	0.2549	0.49141	0.31994			0.56551		0.46896	0.34248	0.47002	1.0417
					0.41585	0.19312	0.57235	0.39819			0.56841		0.37373	0.32646	0.47002	1.2836
					0.53588	0.26203	0.39464	0.3221			0.20131		0.47729	0.22219	0.29634	1.3066
					0.63055	0.35712	0.5471	0.43786			0.33086		0.37731	0.32358	0.31745	0.9514
					0.50084	0.29833	0.49259	0.5919			0.28218		0.41837	0.33751	0.54141	1.4054
					0.60718	0.35102	0.47559	0.57277			0.46458		0.58375	0.30499	0.37193	1.2404
					0.60718	0.38172	0.41412	0.57277			0.33706		0.4235	0.45501	1.1338	0.8771
					0.42445	0.38709	0.41412	0.31521			0.46284		0.76283	0.61946	1.4808	0.83887
					0.28198	0.35822	0.37552	0.52371			0.4494		0.30122	0.61946	0.48518	0.85455
					0.49721	0.3606	0.75354	0.4036			0.52345		0.39366	0.51335	1.1798	1.1768
					0.66969	0.16908	0.71894	0.45942			0.60857		0.3203	0.25675	0.50639	1.3847
					0.40741	0.4189	0.29424	0.26821			0.35726		0.51486	1.1584	1.1962	1.5458
					0.44022	0.39113	0.63777	0.37049			0.60273		0.50767	0.6014	0.69963	1.1616
					0.70605	0.27729	0.51907	0.34148			0.22422		0.41569	1.3696	0.72186	1.1616
					0.56768	0.26384	0.56296	0.51715			0.36191		0.39662	0.98842	0.63533	1.3417
					0.68253	0.37112	0.80578	0.37883			0.36191		0.52198	0.95884	0.41361	0.87594
					0.64932	0.37112	0.52444	0.60501			0.36226		0.49172	0.65928	0.49373	0.75684
					0.33891	0.25512	0.58678	0.51964			0.33275		0.54108	0.73003	0.69295	1.6347
					0.34233	0.19528	0.60273	0.31695			0.30891		0.47075	1.361	0.42691	1.6651
					0.27781	0.36584	0.66706	0.44198			0.2917		0.44302	0.99033	0.62899	1.1593
					0.33094	0.36406	0.68484	0.34249			0.3361		0.61504	0.76939	0.6221	0.91815
					0.53494	0.32349	0.42015	0.48229			0.37365		0.49777	0.89074	0.53363	0.5459
					0.38168	0.26425	0.42015	0.32062			0.36383		0.7484	0.99403	0.28521	1.1703
					0.67696	0.30631	0.42015	0.27396			0.46163		0.63584	0.55774	0.58625	0.93136
					0.34364	0.26449	0.36376	0.33309			0.3912		1.0633	1.7072	0.68527	1.129
					0.28846	0.25096	0.43807	0.27585			0.36271		0.8533	1.0069	0.34523	0.95629
					0.39006	0.29104	0.41061	0.27964			0.33297		0.96863	1.114	0.27478	1.6149
					0.48109	0.34092	0.66229	0.36858			0.33512		0.64567	0.82884	0.29445	1.2495
					0.36939	0.57954	0.31685	0.62206			0.28646		0.64567	1.3196	0.42602	1.4382
					0.40967	0.3266	0.61099	0.71222			0.28178		0.87645	1.455	0.31551	1.3571
					0.33596	0.20763	0.59245	0.71222			0.26784		0.73389	1.5368	0.25604	0.55658
					0.41278	0.31788	0.62082	0.73863			0.35846		1.0303	1.5371	0.43251	0.76353
					0.3395	0.39651	0.39272	0.47091			0.39978		0.9067	1.4461	0.61323	0.73785
					0.29448	0.37052	0.38372	0.5004			0.35405		0.66213	2.2036	0.74904	0.7362
					0.37634	0.45089	0.62892	0.58756			0.25307		0.55807	1.1323	0.20477	1.2588
					0.45537	0.24644	0.42672	0.43121			0.28764		0.63085	1.3345	0.21585	1.2068
					0.55694	0.17139	0.50202	0.46799			0.37242		0.89078	1.0779	0.25281	1.343
					0.64831	0.21685	0.69567	0.24872			0.3029		0.91368	0.88422	0.28584	1.4038
					0.31121	0.23651	0.69567	0.33294			0.40333		0.93686	0.98764	0.21057	1.0574
					0.37847	0.29468	0.54293	0.52764			0.31194		0.79876	0.98764	0.42581	1.1949
					0.25567	0.32583	0.56329	0.40037			0.48959		0.76556	0.92774	0.48319	0.72584
					0.65562	0.26822	0.38629	0.2205			0.2677		0.69822	0.88858	0.24629	1.0162
					0.57755	0.50691	0.56858	0.51337			0.31201		0.57384	0.66202	0.2443	1.0465
					0.7608	0.41817	0.64732	0.46126			0.27216		0.86548	0.65928	0.28577	1.4184
					0.2566	0.28331	0.61379	0.37795			0.25548		0.62472	1.5868	0.25389	1.0249
					0.49533	0.3091	0.61379	0.2812			0.34628		0.4423	0.94305	0.29554	0.7644
					0.35203	0.19087	0.42358	0.36144			0.34628		0.66535	0.60799	0.27691	1.2706
					0.41538	0.40577	0.4346	0.29605			0.39045		0.63966	1.0584	0.32959	0.61277
					0.36585	0.43016	0.86485	0.43136			0.32196		0.81721	1.4747	0.32959	0.57234
					0.40621	0.7025	0.76457	0.3762			0.23578		0.65499	1.1618	0.33652	1.1858
					0.46065	0.3817	0.76457	0.36284			0.4321		0.42392	2.0961	0.68755	0.51907
					0.23258	0.57596	0.34569	0.35442			0.72399		0.5541	0.84024	0.55693	0.78196
					0.46683	0.27205	0.39846	0.30465			0.53924		0.36921	0.50841	0.68587	1.6022
					0.48952	0.54542	0.45047	0.49519			0.41487		0.57275	0.78193	1.3609	0.51809
					0.34725	0.54542	0.25697	0.29492			0.43184		0.69454	0.75572	0.85124	1.2055
					0.52274	0.51225	0.41567	0.51597			0.24411		0.91484	0.79671	1.2988	1.0472
					0.32805	0.71368	0.46076	0.46304			0.26667		0.80494	0.8157	0.63082	1.0231
					0.30879	0.75147	0.56798	0.88647			0.18668		0.85968	1.1578	1.5638	1.0582
					0.41054	0.72229	0.45149	0.4966			0.72699		0.56155	0.8748	1.0057	0.83889
					0.35842	0.22502	0.45149	0.80011			0.72699		0.51237	1.6638	1.5208	1.0749
					0.32057	0.3636	0.56945	0.25942			0.47321		1.0796	0.9465	1.501	1.0172
					0.50338	0.28569	0.56945	0.63063			0.28009		0.69974	1.0517	1.4065	1.1911
					0.61899	0.23017	0.44631	0.46361			0.21038		0.78236	0.65702	1.8795	1.5496
					0.39037	0.37147	0.32759	0.46361			0.41877		0.78236	0.65445	1.4146	1.3254
					0.42327	0.34075	0.72458	0.49142			0.17716		0.55817	0.93479	1.0413	0.98966
					0.61033	0.25187	0.47148	0.25213			0.2718		0.69647	0.50038	1.2952	1.14
					0.586	0.44246	0.2753	0.57368			0.24477		0.76598	0.51628	1.3532	0.93575
					0.23484	0.32323	0.7603	0.35958			0.16877		0.62444	0.71862	1.4712	0.77343
					0.26144	0.63786	0.4149	0.6344			0.27253		0.6862	0.55421	1.42	0.77343
					0.31619	0.68353	0.45596	0.41042			0.35977		0.49757	0.94788	1.73	0.78537
					0.38871	0.42212	0.84699	0.22014			0.32284		0.82911	0.38464	1.1589	1.1879
					0.62574	0.83528	0.3609	0.38521			0.32284		0.67865	0.38154	1.969	0.93559
					0.37959	0.365	0.73784	0.55705			0.26701		0.86792	0.6544	1.9571	0.86829
					0.46527	0.27603	0.53345	0.72518			0.25804		0.80624	0.45671	3.4073	1.1575
					0.47115	0.37063	0.58464	0.28626			0.30566		0.61143	0.5371	0.81409	1.2031
					0.5321	0.51743	0.52361	0.32618			0.2909		0.5209	0.4033	1.5249	0.74639
					0.34778	0.26698	0.52361	0.27709			0.35827		1.756	0.65483	1.701	0.74289
					0.21666	0.54577	0.43489	0.50565			0.53422		1.756	0.30069	1.2236	0.97391
					0.26823	0.22032	0.55518	0.51873			0.21784		0.73544	0.51359	1.3643	0.62138
					0.3906	0.33265	0.55518	0.3715			0.20815		1.0043	0.55243	0.9117	1.2299
					0.33458	0.19463	0.85905	0.53089			0.2484		0.96371	0.38357	1.5096	0.64919
					0.32063	0.29421	0.42427	0.78888			0.31526		1.2016	0.48182	0.84353	0.63649
					0.27898	0.62669	0.42427	0.32348			0.25681		1.446	0.39445	0.98025	0.71851
					0.56405	0.58249	0.56849	0.42666			0.21472		1.1227	0.37447	1.3776	0.63343
					0.9486	0.2592	0.9863	0.4037			0.22566		1.0323	0.64405	1.328	0.94404
					0.3878	0.31171	0.67877	0.76209			0.24393		0.85656	0.61075	1.6735	0.87363
					0.36786	0.28939	0.72488	0.43441			0.21447		0.69862	0.82349	1.2847	0.73031
					0.36786	0.2451	0.47865	0.34227			0.19792		0.69862	0.82349	1.2838	0.51323
					0.29093	0.5113	0.56876	0.46187			0.20633		0.68756	0.87681	1.4294	1.113
					0.2792	0.29876	0.64372	0.38782			0.27262		1.1134	0.41141	1.3985	1.2054
					0.49926	0.55464	0.55812	0.36753			0.28988		1.1134	0.50255	1.2882	1.1401
					0.57021	0.41323	0.41283	0.37342			0.31694		1.2524	0.64186	1.5662	0.58789
					0.33608	0.45094	0.50042	0.32232			0.31957		0.60593	0.64186	1.6114	0.8258
					0.32603	0.35668	0.34436	1.0471			0.35838		1.2168	0.41642	1.2938	0.89804
					0.32603	0.33862	0.8011	0.40984			0.26377		1.1835	0.53516	0.73276	0.85945
					0.33532	0.33862	0.8011	0.19693			0.30569		0.6738	0.38513	1.0374	0.9475
					0.27238	0.40064	0.49951	0.25579			0.27462		0.89597	0.30486	0.97684	0.87974
					0.31905	0.41783	0.46754	0.41397			0.45074		0.72123	0.38446	0.90102	0.52063
					0.45799	0.43115	0.68472	0.37364			0.37003		0.71488	0.45127	1.2419	0.79576
					0.32002	0.45957	0.5347	0.43471			0.34958		0.80051	0.62434	0.96943	1.09
					0.42499	0.35234	0.43688	0.50873			0.41469		0.59418	0.53457	2.3003	1.2992
					0.33418	0.69679	0.52854	0.29907			0.41469		0.7445	0.39946	2.285	0.78128
					0.53282	0.63806	0.68216	0.37673			0.23295		0.70427	0.38825	1.7854	1.3191
					0.40588	0.63806	0.42538	0.65811			0.43631		0.67327	0.3101	1.1692	1.1767
					0.28277	0.39112	0.42179	0.18557			0.28451		1.4805	0.41802	0.91246	0.98683
					0.3722	0.28807	0.68364	0.53456			0.27618		0.58142	0.45947	0.69463	1.5372
					0.29178	0.36933	0.43557	0.4128			0.32085		0.77971	0.43024	1.9626	0.72572
					0.46604	0.35346	0.67873	0.41097			0.26108		1.0126	1.0043	1.62	0.74995
					0.44443	0.42721	0.43743	0.3806			0.26328		0.78135	0.86386	0.65483	0.77582
					0.20561	0.35057	0.75052	0.51946			0.26751		0.63102	0.9336	1.0087	0.62975
					0.78645	0.33957	0.43725	0.3823			0.26364		1.3347	0.23938	1.1479	0.72572
					0.30912	0.47556	0.36243	0.32172			0.30414		0.76901	0.40904	0.98269	0.45154
					0.51895	0.37659	0.40091	0.32181			0.26411		1.0339	0.41152	0.97464	0.69622
					0.36081	0.42126	0.27545	0.23729			0.26649		1.0473	0.47897	0.957	0.54281
					0.30541	0.34241	0.45958	0.33293			0.34855		1.162	0.49121	0.8684	0.76342
					0.34696	0.30943	0.46003	0.33293			0.32069		1.0487	0.40013	0.70675	0.64786
					0.33118	0.253	0.40255	0.52002			0.37096		1.1625	0.47719	1.2064	0.88666
					0.36651	0.30422	0.44458	0.40756			0.3536		1.1942	0.47719	0.34744	1.0084
					0.30094	0.19901	0.75972	0.60144			0.29098		0.544	0.48374	0.71334	1.3846
					0.22276	0.25048	0.71678	0.6325			0.26762		0.50703	0.40536	0.54637	0.88195
					0.37251	0.36971	0.65535	0.25587			0.20624		0.81454	0.35329	0.60974	1.1692
					0.35075	0.36971	0.65535	0.26584			0.20444		0.81454	0.47792	0.53285	1.3984
					0.32885	0.27462	0.45698	0.49344			0.18848		0.64564	0.43568	0.55458	1.1748
					0.27952	0.26342	0.98657	0.48035			0.38545		0.66819	0.43655	1.4	1.6282
					0.31758	0.5007	1.0615	0.99961			0.25543		0.94433	0.52207	1.2753	1.1239
					0.86227	0.70555	0.5951	0.33623			0.2724		0.87536	0.39631	1.1433	0.99234
					0.37538	0.2649	0.73696	0.5129			0.23647		1.1542	0.53351	1.2301	0.59448
					0.4687	0.33365	0.61387	0.45987			0.22236		0.76879	0.67692	1.1335	1.2475
					0.47565	0.33462	0.53284	0.32006			0.20413		0.64553	0.67692	0.89622	1.0291
					0.34619	0.28082	0.65921	0.53939			0.34647		0.6041	0.38126	0.40346	0.47699
					0.33356	0.27605	0.65195	0.38994			0.34647		1.3171	0.59173	0.41497	0.7026
					0.42562	0.22319	0.71185	0.66364			0.24628		1.0825	0.46591	0.45527	0.43096
					0.56048	0.43681	0.42567	0.44971			0.23092		1.0825	0.70458	0.4392	0.69211
					0.35717	0.43681	0.50022	0.40934			0.23639		1.3883	0.88522	0.63391	0.93031
					0.35872	0.25809	0.56414	0.4301			0.34697		0.92023	0.41081	2.1035	0.7827
					0.31185	0.24072	0.51151	0.42767			0.30243		0.75386	0.44447	0.96821	0.66438
					0.46799	0.21889	0.35776	0.30947			0.30417		0.70004	0.43115	0.70946	0.81649
					0.36452	0.24642	0.46912	0.31324			0.34316		0.89485	0.51796	1.423	0.33549
					0.41659	0.23402	0.41492	0.52358			0.25318		0.9717	0.44179	1.1992	0.28098
					0.28523	0.59797	0.40408	0.60078			0.35635		0.7601	0.52704	1.0569	0.20189
					0.58633	0.52495	0.40942	0.49813			0.15713		1.2295	0.56077	1.5318	0.83678
					0.88202	0.61852	0.45746	0.39076			0.15214		1.2311	0.4785	2.775	2.27
					0.30575	0.34415	0.85088	0.33585			0.21656		0.81867	0.32278	1.1708	0.55432
					0.33738	0.37088	0.31648	0.32337			0.26823		1.3489	0.82976	1.4466	1.0319
					0.31358	0.33124	0.76447	0.22214			0.29326		1.3051	0.59454	1.3694	1.1158
					0.59282	0.4867	0.41458	0.19002			0.24168		0.67947	0.65662	0.8761	0.83151
					0.40714	0.39481	0.42463	0.24177			0.33907		1.0232	0.69623	0.45444	0.83151
					0.39629	0.3555	0.42463	0.297			0.19088		0.88513	0.78306	0.82845	0.3451
					0.44959	0.15217	0.40354	0.19207			0.17994		0.82116	0.55953	0.78009	0.34808
					0.91031	0.32364	0.4177	0.36769			0.4248		0.98262	0.47374	0.50033	0.8985
					0.54719	0.34886	0.61244	0.4223			0.26989		0.86907	0.76267	1.2884	1.01
					0.6245	0.19694	0.41929	0.48235			0.35725		0.56314	0.74318	1.2905	0.44643
					0.61006	0.23394	0.37308	0.3123			0.346		0.91745	0.97109	0.83478	0.35929
					0.2594	0.19529	0.56663	0.32771			0.18287		0.73206	0.72902	1.2247	0.31426
					0.74609	0.19529	0.65549	0.34328			0.20346		0.63713	0.37551	1.178	1.3992
					0.65738	0.23267	0.28861	0.392			0.2796		0.93621	0.49905	0.52985	0.70848
					0.3691	0.576	0.50409	0.36568			0.31843		0.69564	0.65882	0.40858	1.1329
					0.2984	0.69075	0.55592	0.35046			0.2707		0.77635	0.54398	0.84709	1.0113
					0.27622	0.19022	0.4376	0.39873			0.25919		0.60197	0.52414	0.71816	0.38228
					0.50067	0.42212	0.82262	0.4512			0.25919		0.78286	0.48494	1.8855	0.54359
					0.44156	0.32544	0.52654	0.46513			0.31122		1.0981	0.48494	0.41387	1.3994
					0.49166	0.36047	0.32587	0.31741			0.26719		0.99582	0.49505	0.83016	2.6231
					0.47342	0.2164	0.68113	0.32509			0.23417		1.1102	0.48475	0.90869	0.48809
					0.37231	0.18235	0.61314	0.23023			0.19048		0.80774	0.68291	0.41458	0.40914
					0.31879	0.18235	0.42233	0.20505			0.20887		1.0415	0.45175	0.33975	0.4046
					0.39585	0.3576	0.8171	0.52677			0.28429		0.98203	0.31847	0.40077	0.49844
					0.40083	0.26491	0.75039	1.3431			0.2464		0.89961	0.48909	0.71312	0.60536
					0.56357	0.39541	0.73699	0.62339			0.34554		0.80464	0.48909	1.0062	0.20763
					0.6354	0.41372	0.47183	0.53266			0.34554		0.70619	0.348	0.31917	0.28995
					0.48639	0.37323	0.68926	0.51707			0.32887		1.0587	0.37278	0.68286	0.32752
					0.39817	0.31863	1.1631	0.49187			0.31208		1.1814	0.38003	0.63723	0.26815
					0.36721	0.23152	0.56233	0.43803			0.30511		0.60666	0.41889	0.44081	0.29454
					0.37451	0.22765	0.56986	0.35163			0.24258		1.139	0.48266	0.98297	0.41707
					0.4029	0.22721	0.64946	0.18638			0.19958		0.67017	0.45558	0.48429	0.76355
					0.26695	0.21596	0.4621	0.18638			0.25249		0.59552	0.71606	0.79702	0.2663
					0.34389	0.20332	0.63923	0.20441			0.22465		0.45767	0.95816	0.8378	0.338
					0.27079	0.37366	0.48646	0.19004			0.34353		0.81668	0.61441	1.0013	0.43911
					0.29677	0.35621	0.91264	0.14608			0.29175		0.71733	0.44113	1.1588	0.43911
					0.24611	0.32357	0.63059	0.15135			0.33502		0.71966	0.75657	1.4587	0.44731
					0.68299	0.22148	0.74664	0.18117			0.25764		0.55595	0.69134	1.5209	0.42734
					0.54203	0.34368	0.49066	0.20461			0.28783		0.3961	0.67956	1.6126	0.36909
					0.24163	0.24885	0.57812	0.17675			0.31458		0.48156	0.71046	1.266	0.41766
					0.1943	0.24308	0.30462	0.2259			0.26006		0.2989	0.8734	1.0828	0.39235
					0.42401	0.21251	0.67173	0.18735			0.2801		0.47722	0.8734	1.3845	0.54187
					0.39925	0.28365	0.37673	0.18735			0.41302		0.37504	0.49899	1.0204	0.28624
					0.30215	0.44469	1.1838	0.52687			0.36719		0.37407	0.56881	1.2106	0.34541
					0.4896	0.49315	0.56183	0.18968			0.37323		1.0266	0.64833	1.8707	0.38135
					0.38228	0.24066	0.52941	0.1816			0.19776		0.71682	0.86434	1.3463	0.38135
					0.42855	0.44697	0.4977	0.26923			0.23354		0.49677	0.5314	2.3128	0.38135
					0.48082	0.32575	0.4977	0.17562			0.20764		0.57213	0.5314	1.896	0.38135
					0.43362	0.28025	0.50103	0.13648			0.20946		0.62862	0.87797	2.358	0.38135
					0.16889	0.35179	0.42849	0.18121			0.34398		1.2555	0.56187	2.19	0.16614
					0.44783	0.16058	0.42841	0.18365			0.24184		0.57052	0.47629	1.9129	0.65026
					0.2749	0.37807	0.48994	0.16147			0.29019		0.64523	0.56126	2.1059	0.60244
					0.3283	0.62843	0.74054	0.13725			0.29553		0.59746	0.87897	2.0974	0.56296
					0.3506	0.65575	0.57158	0.18292			0.21293		0.6408	0.30917	1.7822	0.41161
					0.31266	0.26997	0.63101	0.1763			0.21293		0.90227	0.33672	1.6003	0.78612
					0.38619	0.28145	0.63307	0.16474			0.48841		0.91854	0.36521	1.6492	0.78612
					0.30128	0.42856	0.42148	0.23752			0.43145		0.87203	0.5171	2.4731	0.54151
					0.23409	0.33474	0.45915	0.14363			0.37783		0.86161	0.63577	1.7563	0.54408
					0.45822	0.33474	0.3972	0.12418			0.24779		0.77422	0.61086	1.2019	0.4399
					0.47446	0.73306	0.5887	0.70659			0.24169		0.58478	0.71987	0.81837	0.77399
					0.46473	0.73306	0.5887	0.46001			0.22495		0.65652	0.76994	1.4362	0.52694
					0.25025	0.50866	0.64209	0.25556			0.23727		0.98726	0.73314	1.1883	0.57741
					0.28799	0.35128	0.49276	0.48224			0.3504		0.95778	0.74333	1.2056	0.78322
					0.28799	0.24326	0.40697	0.43432			0.18821		0.98764	0.74333	1.3484	0.61549
					0.3441	0.36124	0.40697	1.1123			0.44893		1.0738	0.61664	3.6165	0.68918
					0.76872	0.3849	0.60816	0.24428			0.41907		0.88426	0.67188	1.0945	0.57059
					0.35558	0.47869	0.29204	0.21877			0.25817		0.73402	0.63451	1.1883	0.86036
					0.6407	0.22051	0.59144	0.23839			0.16135		0.87856	0.53909	1.1523	0.79834
					0.34379	0.23492	0.65125	0.14616			0.17117		0.81184	1.0872	1.7866	0.68704
					0.28059	0.17791	0.37968	0.15634			0.24808		1.3165	0.94753	1.6742	0.68704
					0.30349	0.41301	0.40207	0.16241			0.20009		1.288	1.0176	1.1729	0.62591
					0.25643	0.38482	0.40207	0.16506			0.48307		0.78947	0.96458	1.5601	0.54677
					0.40713	0.32479	0.4553	0.24515			0.23193		0.74142	0.3953	1.4113	0.53367
					0.63376	0.30331	0.48896	0.15635			0.26914		1.1512	0.36466	2.712	0.63725
					0.21783	0.30328	0.59186	0.16456			0.26914		1.1263	0.35541	1.4064	0.77259
					0.47566	0.23436	0.47919	0.52063			0.24995		0.83177	0.59094	1.2642	0.31878
					0.31604	0.33397	0.47919	0.44149			0.28886		0.8413	0.36789	0.70764	0.61822
					0.40359	0.40912	0.41115	0.16328			0.24182		0.89749	0.33092	0.97356	0.69826
					0.2907	0.23919	0.41115	0.47691			0.34852		1.0648	0.56675	1.3933	0.69826
					0.21681	0.50718	0.54607	0.79601			0.365		1.0648	0.56675	0.78892	0.56647
					0.26414	0.79998	0.67969	0.583			0.26271		0.63751	0.42249	0.94445	0.43364
					0.39906	0.31532	0.66482	0.64023			0.30482		0.76017	0.335	1.0759	0.54602
					0.23796	0.25546	0.65865	0.42023			0.57848		1.4126	0.7332	1.8779	0.63352
					0.22853	0.25794	0.36587	0.202			0.22866		0.80578	0.53343	1.7572	0.63352
					0.44147	0.27013	0.4942	0.51846			0.30809		0.6511	0.55646	0.74733	0.3389
					0.44147	0.88287	0.39804	0.91345			0.31069		1.0255	0.55646	0.91694	1.2196
					0.30897	0.32105	0.47815	0.82094			0.21808		0.76038	0.90914	0.77217	0.62512
					0.42487	0.32105	0.47815	0.56807			0.6749		0.6628	0.34983	1.4198	0.6677
					0.29153	0.32105	0.29594	0.62595			0.3651		1.0585	0.54365	1.5518	0.51262
					0.52738	0.48648	0.41929	0.29214			0.15852		0.64033	0.40702	1.4097	0.67586
					0.21804	0.27478	0.4567	0.50123			0.22985		0.64762	0.59723	1.3165	0.58499
					0.30762	0.26631	0.46466	0.38638			0.25581		0.77215	0.40814	0.94658	0.53073
					0.44019	0.33168	0.33636	0.70214			0.3182		0.74985	0.55339	1.1113	0.58709
					0.30696	0.33031	0.4189	0.39805			0.42069		1.6991	0.55557	0.95576	0.58354
					0.31167	0.24766	0.44337	0.37841			0.18364		0.78225	1.0098	0.95576	0.39997
					0.25727	0.24141	0.59092	0.34726			1.1179		0.93541	0.46335	0.82184	0.4041
					0.34382	0.31587	0.59092	0.2805			1.1179		0.8605	0.28744	0.69882	0.60564
					0.20991	0.31587	0.4835	0.29619			0.33307		0.62224	0.42218	0.47102	0.88189
					0.47095	0.27961	0.44101	0.33268			0.34654		0.52056	0.62193	0.47989	0.8892
					0.31331	0.38222	0.38057	0.45247			0.34103		1.2994	0.88711	0.5509	0.6106
					0.21821	0.28962	0.49732	0.21101			0.46171		0.68974	0.43301	1.8451	0.52725
					0.22422	0.33635	0.4973	0.15528			0.34959		0.94178	0.54399	1.7457	0.85792
					0.36723	0.31844	1.0931	0.15503			0.66689		0.94243	0.37303	1.0024	0.39111
					0.36723	0.53143	0.55599	0.20031			0.21077		0.65018	0.49567	0.40053	0.43071
					0.37349	0.57454	0.72893	0.16519			0.37906		0.68694	0.48106	0.48899	0.41792
					0.37948	0.45579	0.43141	0.16519			0.48599		0.85024	0.78058	0.4826	0.33529
					0.42644	0.47773	0.54153	0.16519			0.50469		0.77494	0.64625	1.0088	0.54153
					0.41764	0.49404	0.53997	0.26859			0.21975		0.90433	0.66128	0.73366	0.44827
					0.28741	0.3314	0.3863	0.15375			0.25014		0.97817	0.44481	1.6014	0.3557
					0.22032	0.37804	0.44116	0.16476			0.38075		0.79818	0.32638	0.88353	0.66286
					0.2921	0.43173	0.58479	0.16476			0.4122		0.485	0.47219	1.3295	0.64699
					0.22041	0.56804	0.52612	0.26445			0.2541		0.39614	0.48579	1.0902	0.56165
					0.24958	0.33748	0.90062	0.18156			0.44333		0.75518	0.68978	2.0938	0.65531
					0.25058	0.38549	0.43115	0.19759			0.49306		0.70232	0.41153	0.69741	0.65531
					0.62151	0.4146	0.53136	0.16114			0.22274		0.4214	0.76411	0.75692	0.33556
					0.45441	0.68759	0.49489	0.17042			0.28063		0.49026	0.76411	0.61751	0.5352
					0.36556	0.3108	0.5322	0.18869			0.25291		0.57473	0.60254	0.55006	0.46268
					0.46959	0.71616	0.39289	0.18869			0.47375		0.56455	0.38964	0.65679	0.44111
					0.45637	0.33432	0.55613	0.78084			0.45362		0.32693	0.58377	1.1492	0.44111
					0.30098	0.1983	0.55613	0.48271			0.26901		0.60056	0.57525	1.1164	0.50506
					0.31023	0.2053	0.45604	0.64046			0.59314		0.72566	0.77871	0.79144	0.57184
					0.35726	0.13423	0.38449	0.29023			0.47145		0.68152	0.5227	1.1739	0.87019
					0.35726	0.44873	0.47109	0.28273			0.35367		0.70207	0.65311	1.1452	0.90382
					0.2621	0.43099	0.44734	0.28273			0.34486		2.0341	0.49535	0.47321	0.82318
					0.35579	0.39498	0.74936	0.32102			0.39357		0.53458	0.66054	0.70297	1.0448
					0.2219	0.25742	0.86684	0.38309			0.42706		0.64961	0.75374	0.64048	0.73983
					0.19268	0.32745	0.3456	0.3208			0.56924		0.41529	1.1305	1.3717	0.73983
					0.22356	0.25425	0.59319	0.22748			0.49022		0.57693	0.49302	0.67355	0.82253
					0.27534	0.31515	0.56686	0.3906			0.23816		0.57695	0.46351	1.6935	0.73704
					0.26752	0.66189	0.56686	0.32566			0.6046		0.73453	0.73216	0.38491	0.61211
					0.32949	0.23328	0.40423	0.28077			0.52428		0.41906	0.49302	0.765	0.74727
					0.32949	0.36349	0.33763	0.36065			0.55024		0.70829	0.69368	0.32793	0.42531
					0.32691	0.19068	0.84409	0.42542			0.28853		0.65432	0.5758	0.38897	0.69467
					0.35504	0.19212	0.49839	0.28639			0.3501		0.55041	0.69551	0.66075	0.46735
					0.31996	0.20943	0.3225	0.37722			0.39734		0.39036	0.68814	1.324	0.64969
					0.33005	0.19211	0.62827	0.21795			0.30979		0.44837	0.96673	0.70232	0.60556
					0.46387	0.33755	0.43692	0.23274			0.54656		0.35321	0.6461	0.48624	0.60556
					0.61323	0.2293	0.61437	0.26262			0.51521		0.38605	0.65964	0.26437	0.56007
					0.62364	0.24868	0.652	0.23184			0.50226		0.56508	0.74259	0.32775	1.0164
					0.48397	0.24595	0.40723	0.16639			0.85781		0.90611	0.74259	0.97129	1.0164
					0.25866	0.21356	0.49698	0.20034			0.34605		1.2054	0.45203	0.45809	0.96902
					0.37266	0.18893	0.53472	0.22148			0.2944		0.55291	0.91353	0.40377	1.0516
					0.24504	0.27133	0.35069	0.23082			0.66699		0.56521	0.64815	0.8479	0.34037
					0.28468	0.31116	0.35069	0.16371			0.28404		0.45207	0.64815	0.78299	0.68478
					0.63539	0.31116	0.43042	0.159			0.37181		0.73622	0.75921	0.66469	0.95733
					0.59197	0.20114	0.50337	0.1861			0.33451		0.58532	0.50938	0.66469	0.41113
					0.53098	0.20114	0.44477	0.22971			0.31703		0.53015	0.98465	0.66136	0.42582
					0.2917	0.24896	0.58733	0.19473			0.34454		1.121	0.47406	0.59333	0.63576
					0.2926	0.16937	0.79791	0.171			0.46975		0.65929	0.66764	0.72496	1.0505
					0.31353	0.16766	0.5432	0.16015			0.46975		1.0354	0.55722	1.2586	0.58552
					0.16369	0.3321	0.31066	0.17429			0.33628		0.77244	0.49274	0.82263	0.5473
					0.25734	0.37335	0.32828	0.19389			0.47613		0.5425	0.68759	0.67612	0.60255
					0.25734	0.24571	0.39187	0.17915			0.47776		0.64353	0.47218	1.0553	0.57673
					0.23689	0.22522	0.56751	0.29717			0.58679		0.41882	0.47218	0.55948	0.6597
					0.29592	0.22624	0.37618	0.21069			0.45168		0.69416	0.57408	1.3017	0.87102
					0.36764	0.21343	0.68687	0.21069			0.34995		0.76901	1.2652	0.60253	0.92222
					0.50583	0.18866	0.69658	0.13824			0.39136		0.87979	0.47721	0.91403	0.6601
					0.50583	0.18866	0.35828	0.18479			0.4857		0.98286	0.88503	0.92221	0.6601
					0.22875	0.16532	0.29501	0.17433			0.49833		0.43516	1.1972	1.3009	0.3654
					0.35655	0.21365	0.77903	0.14048			0.32781		0.55745	1.1042	1.5602	0.55308
					0.40675	0.30131	0.27594	0.18002			0.26505		0.53601	1.2551	0.70958	0.55308
					0.31421	0.19962	0.36661	0.19768			0.33282		0.39205	0.65676	0.63781	0.53488
					0.44121	0.212	0.38264	0.20121			0.38971		0.61185	0.75239	0.70521	0.36154
					0.4922	0.2303	0.49112	0.1869			0.35896		0.52476	0.81755	0.87564	0.38464
					0.2876	0.19973	0.42865	0.16911			0.32423		0.53581	0.74551	0.92078	0.38062
					0.2405	0.23001	0.37651	0.17092			0.29652		0.65313	0.93228	1.1085	0.61054
					0.21442	0.21411	0.42543	0.22315			0.43121		0.66081	0.67499	0.67445	0.42684
					0.23841	0.22066	0.36894	0.24943			0.43669		0.60373	0.52284	1.2932	0.44414
					0.21454	0.21865	0.29529	0.15594			0.49857		0.66402	1.6589	0.98079	0.4595
					0.27327	0.26334	0.24982	0.14092			0.55365		0.32555	0.77564	0.75733	0.51017
					0.37004	0.25952	0.23203	0.21032			0.28132		1.0051	0.45084	0.6283	0.5609
					0.34658	0.26715	0.34226	0.1758			0.26631		1.2653	0.62623	0.73223	0.92634
					0.2074	0.20814	0.26893	0.14661			0.27647		1.2786	0.59793	0.55712	0.50783
					0.28987	0.21939	0.25435	0.16224			0.52321		0.88206	0.35542	0.88289	0.43994
					0.20976	0.23143	0.26539	0.21385			0.47502		0.76727	0.55854	0.71142	0.5718
					0.18733	0.48578	0.41363	0.21385			0.38882		0.7753	0.84383	0.85268	0.44004
					0.18275	0.30949	0.17609	0.20996			0.38882		0.72308	0.86081	0.56706	0.57858
					0.20389	0.32368	0.3148	0.47544			0.33835		0.66368	0.64797	0.4271	0.4581
					0.31163	0.22924	0.28901	0.36826			0.21808		0.60438	0.8251	0.50893	0.4581
					0.24414	0.23285	0.53577	0.58107			0.54183		1.0543	0.42951	1.0714	0.3417
					0.37645	0.23002	0.60211	0.24988			0.49107		0.94011	0.80764	1.2753	0.54085
					0.31126	0.55932	0.55962	0.18213			0.3427		0.52989	0.79825	1.1342	0.37192
					0.24105	0.23298	0.25675	1.0426			0.37451		1.1765	0.80401	0.94954	0.27812
					0.22725	0.41195	0.36311	0.59402			0.43993		0.64977	0.96022	0.71899	0.26626
					0.2899	0.35402	0.44652	0.37942			0.36187		0.53478	0.58834	1.0629	0.81387
[truncated: 5,336 more rows]
