# Supplementary material for: Inhibition gates supralinear Ca2+ signaling in Purkinje cell dendrites during practiced movements
Source: eLife. 2018 Aug 17;7:e36246. doi: 10.7554/eLife.36246 (PMC6120752; doi:10.7554/eLife.36246)
Supplement: Figure 2—figure supplement 2—source data 1. [file elife-36246-fig2-figsupp2-data1.xlsx]

## Sheet: Figure 2 Supp 2
	Control							CNO
Time	Mouse 1	Mouse 2	Mouse 3	Mouse 4	Mouse 5	Mouse 6		Mouse 1	Mouse 2	Mouse 3	Mouse 4	Mouse 5	Mouse 6
-0.3006	328.931	324.612	239.927	329.638	200.556	206.167		323.547	273.286	268.046	310.801	277.48	162.935
-0.2672	330.631	324.775	240.117	330.664	200.504	206.016		319.932	272.869	269.468	311.548	277.475	163.689
-0.2338	333.556	326.782	240.207	332.443	199.946	205.525		321.767	272.189	270.186	312.521	276.947	164.242
-0.2004	333.198	328.934	240.474	333.571	200.722	204.396		318.859	271.503	270.968	313.621	278.397	164.107
-0.167	331.455	328.375	240.859	332.535	200.242	205.382		319.905	271.636	270.443	313.437	278.452	165.257
-0.1336	328.937	329.229	240.396	333.439	200.409	204.685		319.057	272.362	270.185	315	277.732	164.979
-0.1002	328.215	327.021	239.731	335.389	200.362	204.905		317.347	272.133	268.147	314.886	277.317	164.935
-0.0668	327.367	326.136	239.026	335.434	200.927	204.442		318.764	272.285	267.897	314.392	275.871	163.846
-0.0334	329.095	330.525	238.277	337.944	200.844	204.453		318.189	272.637	268	312.126	275.154	163.427
0	327.472	332.011	238.427	335.417	200.737	203.62		315.197	271.066	267.571	310.719	273.534	162.766
0.0334	327.397	330.388	238.251	335.055	200.403	202.571		316.479	271.277	267.563	310.332	273.386	161.526
0.0668	327.324	330.774	238.42	332.797	201.039	202.641		319	270.395	267.567	308.474	272.83	160.967
0.1002	327.329	328.922	238.021	331.457	200.78	202.095		317.612	270.303	265.905	307.448	272.59	161.416
0.1336	328.786	331.463	238.275	327.733	200.994	202.96		315.553	275.414	265.092	305.727	272.942	166.308
0.167	326.999	340.594	239.205	326.619	200.103	204.567		316.343	282.068	270.684	305.985	272.473	172.003
0.2004	327.273	353.869	243.209	327.59	200.242	205.626		314.499	286.717	280.583	308.469	275.565	178.874
0.2338	331.423	363.971	246.843	330.04	203.205	207.732		321.067	291.477	288.367	311	283.819	186.782
0.2672	336.261	366.401	254.829	330.581	206.008	207.146		322.722	292.165	298.684	312.177	294.406	193.981
0.3006	338.441	363.363	261.768	329.307	208.553	207.259		318.988	289.939	317.186	313.814	303.166	197.399
0.334	345.564	357.808	264.931	331.857	209.487	206.325		314.964	289.045	329.943	319.757	309.83	195.956
0.3674	355.417	355.95	262.444	332.328	209.658	203.755		317.693	286.524	327.597	322.625	310.428	191.491
0.4008	360.055	353.297	258.258	331.597	208.887	202.095		341.046	284.556	317.274	323.676	306.339	184.949
0.4342	355.803	347.736	253.87	329.919	208.772	202.917		347.88	283.456	303.332	326.048	302.285	183.17
0.4676	354.608	345.131	252.309	330.818	209.594	200.37		343.517	283.268	295.85	327.483	300.143	177.712
0.501	354.209	345.071	251.795	333.194	209.54	199.126		342.244	281.764	290.749	330.108	298.567	171.785
0.5344	352.376	345.733	250.992	338.24	212.296	200.412		340.357	284.537	285.339	333.031	297.032	169.968
0.5678	360.888	363.258	262.047	345.134	227.633	204.359		345.034	298.575	288.45	339.55	320.798	170.2
0.6012	365.497	375.61	279.135	358.442	237.455	208.882		343.096	339.551	298.019	354.753	354.625	171.489
0.6346	367.255	391.303	280.197	368.359	237.792	208.496		350.826	349.071	301.219	358.756	360.101	172.461
0.668	362.387	419.218	278.692	379.263	232.557	210.076		366.972	342.969	297.589	367.92	353.991	174.925
0.7014	357.945	424.406	273.725	388.369	228.743	209.799		366.074	337.734	292.599	374.766	340.695	175.334
0.7348	353.519	416.071	268.616	392.196	226.334	206.393		363.337	340.139	284.329	375.02	333.045	173.649
0.7682	349.89	393.397	263.825	384.153	223.183	203.354		357.259	331.873	277.584	369.135	326.158	170.586
0.8016	350.397	379.422	259.497	376.205	219.268	201.895		345.581	321.743	273.366	358.961	317.593	167.905
0.835	352.448	371.912	256.242	371.603	216.341	199.25		340.698	313.798	269.41	352.253	309.528	165.693
0.8684	351.325	364.64	252.688	367.006	214.173	196.606		339.851	306.835	265.128	346.288	306.566	164.011
0.9018	350.619	358.264	249.495	363.294	212.781	196.494		340.65	302.953	261.899	343.86	306.439	163.053
0.9352	345.375	349.732	247.635	358.289	210.69	196.33		342.213	297.656	262.749	341.78	307.054	162.878
0.9686	342.272	340.613	246.772	353.952	209.86	195.412		342.628	295.647	260.988	337.898	310.607	161.936
1.002	340.529	336.805	245.733	350.713	209.872	194.841		343.811	293.848	259.743	336.316	313.966	161.837
1.0354	341.779	337.885	246.061	351.221	208.627	195.905		344.133	291.079	260.888	340.304	312.629	161.44
1.0688	340.583	337.107	247.156	354.043	207.409	196.285		345.349	289.707	265.052	340.824	310.403	161.373
1.1022	340.834	333.903	248.187	353.777	206.729	195.739		344.507	288.368	266.664	342.739	308.701	161.422
1.1356	340.087	333.506	248.173	352.654	206.475	196.96		343.777	290.412	268.891	343.006	307.48	161.628
1.169	340.626	330.754	249.204	350.626	205.139	198.258		339.409	288.951	274.163	338.399	304.405	162.177
1.2024	337.374	331.396	249.705	350.762	206.006	198.403		334.934	286.086	277.297	338.93	299.863	161.647
1.2358	338.013	331.596	248.268	348.942	206.201	197.681		335.638	285.812	278.051	340.334	298.119	161.878
1.2692	338.417	329.023	247.599	345.327	206.507	197.844		341.094	284.376	276.05	340.948	295.595	162.706
1.3026	336.044	331.127	247.53	343.451	206.272	198.236		344.657	283.276	275.817	342.645	293.418	162.845
1.336	333.808	338.978	246.832	343.887	205.838	197.58		343.871	282.336	275.387	341.406	293.467	162.635
1.3694	334.566	335.801	245.727	347.444	205.596	197.235		344.493	282.712	275.207	342.022	293.183	162.014
1.4028	333.585	333.929	244.069	346.137	205.148	197.586		341.336	283.88	273.649	339.031	292.539	162.155
1.4362	334.067	337.944	243.144	342.392	204.672	197.677		339.936	282.831	273.122	335.962	292.026	161.836
1.4696	336.396	338.79	242.405	340.137	204.646	199.207		340.242	282.659	273.409	331.943	291.358	162.474
1.503	331.837	335.435	241.808	337.918	204.162	198.314		340.484	282.74	275.277	328.916	292.07	163.149
1.5364	332.105	332.253	241.244	334.131	204.493	199.177		341.217	283.256	276.68	327.999	291.683	164.105
1.5698	331.387	328.645	241.293	333.633	204.428	199.878		335.179	282.776	277.588	326.068	290.863	164.282
1.6032	331.043	328.2	242.027	333.317	203.663	199.279		332.133	282.812	276.218	324.641	289.136	164.331
1.6366	331.153	329.61	242.059	332.961	203.752	200.315		329.717	284.123	275.844	322.736	290.096	164.202
1.67	332.854	328.186	242.539	335.576	203.4	199.435		328.058	284.371	275.203	320.998	291.637	163.644
1.7034	336.081	325.827	241.683	338.728	203.863	200.482		327.222	283.426	273.739	321.065	289.406	162.665
1.7368	337.98	326.685	240.349	339.209	203.128	200.329		330.054	282.706	272.417	322.293	288.919	162.437
1.7702	336.857	327.564	240.355	338.276	203.065	200.653		326.776	281.121	269.904	320.274	289.577	163.894
1.8036	337.16	324.711	239.723	335.503	201.97	200.418		325.232	280.227	267.83	318.504	289.537	164.448
1.837	337.294	323.886	239.545	336.04	201.493	200.358		326.196	279.361	264.801	316.569	289.546	164.795
1.8704	335.937	322.533	239.193	334.138	201.087	199.657		328.351	278.738	263.12	315.245	291.661	163.816
1.9038	332.229	321.716	239.039	331.395	201.488	199.944		332.431	276.969	262.608	316.381	291.468	163.426
1.9372	330.279	323.269	238.596	329.381	201.696	200.124		334.685	276.112	261.782	316.855	289.209	163.769
1.9706	329.491	325.084	238.076	327.372	202.478	199.46		339.541	275.289	260.465	314.693	287.782	162.863
2.004	328.916	326.359	237.532	327.272	203.577	199.679		337.311	273.921	260.039	311.621	285.507	162.558
2.0374	332.086	322.135	237.65	326.067	203.655	199.707		332.207	273.103	261.905	311.267	283.779	161.659
2.0708	330.663	318.814	237.626	323.928	202.898	200.735		332.787	273.316	262.316	311.978	283.524	161.271
2.1042	334.139	320.732	238.062	322.5	202.364	200.636		331.222	273.217	261.916	310.655	281.855	160.779
2.1376	335.811	322.804	238.259	322.372	201.612	199.835		329.207	272.507	261.507	308.095	280.973	160.808
2.171	334.588	321.158	238.267	321.32	201.253	202.137		327.983	271.243	260.905	307.96	279.944	160.864
2.2044	332.432	320.247	237.794	322.289	201.159	201.881		327.895	271.796	258.488	308.142	279.62	161.394
2.2378	332.514	325.393	237.491	323.021	201.815	201.641		338.509	271.182	257.749	309.174	278.242	161.004
2.2712	332.539	324.166	237.157	323.309	201.941	201.963		334.73	271.12	257.487	308.099	277.024	160.441
2.3046	338.825	324.449	236.804	325.784	201.986	202.335		329.677	270.976	256.398	309.293	275.944	160.112
2.338	336.981	327.727	237.442	325.021	201.573	202.7		326.396	270.844	254.894	308.366	275.333	160.048
2.3714	334.897	324.712	237.993	321.977	201.616	202.215		324.366	270.882	255.527	307.371	275.888	160.387
2.4048	335.67	321.221	238.018	323.646	201.545	202.01		321.897	271.274	255.826	305.451	275.474	160.338
2.4382	333.189	322.842	238.564	327.752	200.944	201.717		323.154	271.914	255.786	303.185	276.045	159.483
2.4716	330.206	320.907	237.894	329.097	201.353	201.287		322.684	271.559	255.59	301.602	276.095	159.903
2.505	327.873	320.577	237.547	329.521	200.859	201.542		317.149	271.268	256.33	300.533	275.446	159.613
2.5384	328.675	318.009	238.326	328.596	201.061	201.924		314.864	270.704	256.187	301.233	274.564	159.173
2.5718	328.605	317.218	238.505	329.922	201.282	201.888		312.592	271.262	255.847	303.951	273.145	159.003
2.6052	332.231	317.861	238.135	329.208	201.535	202.484		314.953	270.414	254.723	303.171	271.822	158.034
2.6386	334.169	319.279	238.266	328.017	201.129	204.085		313.135	272.183	251.945	306.158	271.415	158.78
2.672	333.267	321.893	238.767	327.949	201.314	203.911		317.926	272.011	250.888	306.864	272.111	159.068
2.7054	337.717	323.582	238.994	326.632	201.204	203.826		317.734	273.494	249.193	306.247	271.438	159.548
2.7388	333.903	322.867	239.693	326.536	200.746	204.395		315.081	272.177	248.362	307.193	271.097	159.997
2.7722	331.583	321.406	240.106	327.301	201.532	204.855		317.109	272.945	247.796	306.254	271.435	160.345
2.8056	331.494	317.625	239.432	330.465	201.992	205.12		315.248	273.065	247.778	305.378	270.23	159.678
2.839	328.755	317.841	239.068	329.017	202.269	204.278		312.854	273.262	248.264	304.702	268.853	159.356
2.8724	325.403	317.409	238.691	328.254	202.202	203.158		318.061	272.763	248.458	306.96	268.857	159.403
2.9058	326.453	316.913	238.905	329.108	202.499	204.613		312.983	271.972	249.841	307.902	268.864	159.797
2.9392	327.969	317.233	238.907	327.474	202.532	205.256		312.855	272.434	249.468	308.912	269.827	159.587
2.9726	329.2	317.373	239.183	326.197	202.679	203.907		314.614	271.498	249.387	309.709	270.993	160
3.006	330.792	316.633	238.711	323.572	201.723	204.619		313.254	271.776	248.503	307.774	269.9	160.606
3.0394	332.103	314.373	238.506	323.28	201.525	204.445		312.736	274.825	247.7	309.048	268.711	160.983
3.0728	331.021	314.913	238.097	325.488	201.579	202.675		312.283	275.006	248.051	310.818	269.426	161.141
3.1062	323.719	314.317	238.396	325.673	200.831	203.352		311.496	275.941	248.953	307.76	269.296	160.893
3.1396	322.29	318.288	238.551	327.123	199.415	202.461		311.09	273.773	247.912	308.776	269.479	160.033
3.173	324.807	323.181	238.092	324.007	201.187	203.749		318.314	273.202	248.367	307.155	271.178	158.831
3.2064	322.89	322.496	238.464	326.956	201.891	204.696		322.769	274.709	251.281	308.416	272.818	159.848
3.2398	326.555	321.925	238.8	332.096	202.618	205.131		325.516	273.718	253.446	311.247	276.329	159.851
3.2732	327.308	318.053	239.284	332.761	202.193	204.165		321.645	273.824	254.47	311.659	279.039	159.813
3.3066	327.217	317.567	238.982	333.699	201.674	204.977		320.758	272.897	255.332	313.895	279.121	160.402
3.34	327.701	317.895	239.248	334.042	201.288	205.928		314.355	272.911	256.626	316.214	278.186	159.953
3.3734	334.765	320.141	238.739	335.058	200.906	204.955		317.11	271.598	260.144	316.264	277.73	160.019
