# Supplementary material for: Inhibition gates supralinear Ca2+ signaling in Purkinje cell dendrites during practiced movements
Source: eLife. 2018 Aug 17;7:e36246. doi: 10.7554/eLife.36246 (PMC6120752; doi:10.7554/eLife.36246)
Supplement: Figure 2—figure supplement 3—source data 1. [file elife-36246-fig2-figsupp3-data1.xlsx]

## Sheet: Figure 2 Supp 3
Panel B		Control								CNO
	Time	Mouse 1	Mouse 2	Mouse 3	Mouse 4	Mouse 5	Mouse 6	Mouse 7		Mouse 1	Mouse 2	Mouse 3	Mouse 4	Mouse 5	Mouse 6	Mouse 7
	0	1	1	1	1	1	1	1		1	1	1	1	1	1	1
	0.1	0.53061	0.68519	0.91667	0.52055	0.68056	0.73596	0.80128		0.5102	0.31765	0.56098	0.36735	0.6044	0.76471	0.5101
	0.2	0.61224	0.7037	0.89583	0.64384	0.5	0.3764	0.42949		0.59184	0.67059	0.70732	0.70748	0.51648	0.52941	0.76768
	0.3	0.73469	0.83333	0.9375	0.86758	0.81944	0.75843	0.85897		0.67347	0.83529	0.9878	0.88435	0.79121	0.78235	0.86869
	0.4	0.85714	0.83333	0.79167	0.85388	0.94444	0.87079	0.85256		0.77551	0.85882	0.69512	0.68707	0.9011	0.87647	0.81313
	0.5	0.77551	0.87037	0.72917	0.69863	0.93056	0.70225	0.92308		0.77551	0.65882	0.63415	0.7619	0.91209	0.88235	0.80808
	0.6	0.5102	0.92593	0.625	0.75342	0.69444	0.40449	0.92949		0.4898	0.62353	0.53659	0.72789	0.69231	0.58824	0.70707
	0.7	0.59184	0.7963	0.5625	0.6895	0.66667	0.33146	0.6859		0.61224	0.65882	0.5122	0.80272	0.6044	0.57647	0.67172
	0.8	0.59184	0.51852	0.375	0.70776	0.70833	0.46629	0.44231		0.65306	0.61176	0.39024	0.70068	0.7033	0.63529	0.57071
	0.9	0.42857	0.57407	0.375	0.59817	0.68056	0.36517	0.69231		0.34694	0.42353	0.28049	0.64626	0.69231	0.67647	0.51515
	1	0.44898	0.51852	0.29167	0.56164	0.48611	0.25281	0.58974		0.42857	0.51765	0.23171	0.68707	0.59341	0.37647	0.55556
	1.1	0.36735	0.38889	0.20833	0.57534	0.45833	0.29775	0.30128		0.4898	0.27059	0.18293	0.71429	0.41758	0.48824	0.42929
	1.2	0.36735	0.27778	0.16667	0.33333	0.41667	0.26966	0.42949		0.34694	0.36471	0.19512	0.52381	0.48352	0.43529	0.37879
	1.3	0.28571	0.12963	0.14583	0.379	0.38889	0.20787	0.29487		0.30612	0.24706	0.13415	0.52381	0.30769	0.34706	0.31818
	1.4	0.38776	0.16667	0.083333	0.30594	0.26389	0.16292	0.1859		0.38776	0.31765	0.15854	0.59864	0.28571	0.25882	0.32828
	1.5	0.22449	0.11111	0.10417	0.21005	0.30556	0.19101	0.20513		0.32653	0.27059	0.18293	0.4898	0.27473	0.3	0.19192
	1.6	0.16327	0.11111	0.083333	0.24658	0.25	0.13483	0.14744		0.20408	0.25882	0.13415	0.31973	0.18681	0.23529	0.18687
	1.7	0.26531	0.074074	0.041667	0.18721	0.22222	0.11798	0.1859		0.26531	0.23529	0.18293	0.46939	0.20879	0.17647	0.16162
	1.8	0.22449	0.12963	0.041667	0.23744	0.25	0.16854	0.16026		0.22449	0.23529	0.17073	0.33333	0.1978	0.20588	0.085859
	1.9	0.18367	0.14815	0.020833	0.20091	0.30556	0.10112	0.20513		0.18367	0.17647	0.15854	0.27891	0.12088	0.12941	0.09596
	2	0.20408	0.12963	0	0.21918	0.27778	0.12921	0.1859		0.2449	0.22353	0.12195	0.2449	0.13187	0.12941	0.085859
	2.1	0.20408	0.18519	0.020833	0.19178	0.26389	0.14045	0.21154		0.12245	0.22353	0.10976	0.30612	0.087912	0.12941	0.065657
	2.2	0.16327	0.074074	0	0.16438	0.18056	0.08427	0.12179		0.12245	0.11765	0.18293	0.15646	0.12088	0.041176	0.050505
	2.3	0	0	0	0.018265	0.041667	0.005618	0.0064103		0	0.011765	0	0.013605	0	0.011765	0.020202
	2.4	0	0	0	0	0	0	0		0	0	0	0	0	0	0
	2.5	0	0	0	0	0	0	0		0	0	0	0	0	0	0
Inset	Lag	Mouse 1	Mouse 2	Mouse 3	Mouse 4	Mouse 5	Mouse 6	Mouse 7		Mouse 1	Mouse 2	Mouse 3	Mouse 4	Mouse 5	Mouse 6	Mouse 7
	-1	0.013964	0.023906	0.0090226	0.027	0.017698	0.010505	0.028055		0.021217	0.029979	0.022023	0.039956	0.024313	0.024793	0.032635
	-0.99	0.011506	0.021666	0.017125	0.024267	0.015758	0.011525	0.030456		0.020728	0.025008	0.026934	0.034899	0.023812	0.025734	0.030307
	-0.98	0.021857	0.034517	0.012588	0.031645	0.027242	0.016637	0.028971		0.029086	0.017156	0.026445	0.044442	0.026533	0.022667	0.028246
	-0.97	0.015259	0.026282	0.02734	0.02809	0.030385	0.019397	0.026173		0.023357	0.021801	0.021916	0.043892	0.029378	0.021886	0.031409
	-0.96	0.014579	0.024348	0.01198	0.030919	0.036875	0.019241	0.028227		0.013359	0.025031	0.01403	0.037251	0.033279	0.023318	0.027486
	-0.95	0.022632	0.025322	0.015437	0.030712	0.02613	0.018578	0.026475		0.01877	0.023538	0.026774	0.051322	0.024591	0.02522	0.030653
	-0.94	0.020893	0.0282	0.01653	0.027232	0.031273	0.023308	0.028567		0.0091968	0.023483	0.022277	0.040452	0.032477	0.027875	0.029855
	-0.93	0.016491	0.029534	0.011177	0.028948	0.038877	0.020281	0.028074		0.031215	0.027589	0.023301	0.036125	0.029964	0.032598	0.030883
	-0.92	0.017959	0.0269	0.011435	0.030594	0.035438	0.017561	0.032848		0.031647	0.020074	0.018928	0.029289	0.035454	0.036163	0.029382
	-0.91	0.022483	0.034045	0.018206	0.028098	0.032025	0.023906	0.035953		0.019452	0.017591	0.02303	0.034852	0.031727	0.031833	0.034374
	-0.9	0.020053	0.02511	0.01902	0.034069	0.030293	0.019859	0.039393		0.029583	0.025137	0.022615	0.03669	0.027027	0.033176	0.037644
	-0.89	0.028458	0.025784	0.017532	0.026417	0.025481	0.01326	0.04403		0.0099134	0.030039	0.019107	0.028894	0.032687	0.033693	0.030868
	-0.88	0.015171	0.03292	0.027207	0.026509	0.031234	0.017831	0.035571		0.018451	0.025152	0.026656	0.032956	0.034749	0.028209	0.030161
	-0.87	0.019925	0.028966	0.01237	0.026603	0.022033	0.016291	0.035027		0.018561	0.026526	0.021963	0.031616	0.029267	0.030952	0.037082
	-0.86	0.011707	0.030897	0.0085488	0.026557	0.025847	0.01142	0.034895		0.019279	0.028643	0.028915	0.044295	0.030263	0.029033	0.033401
	-0.85	0.018165	0.033777	0.018948	0.030382	0.02854	0.015408	0.035969		0.030371	0.02858	0.021149	0.040223	0.025999	0.030364	0.034327
	-0.84	0.018437	0.032078	0.01275	0.03685	0.02725	0.016695	0.027129		0.032449	0.026073	0.02883	0.044488	0.025182	0.021805	0.036361
	-0.83	0.025422	0.035064	0.030523	0.027568	0.026577	0.016401	0.035192		0.027603	0.031776	0.025898	0.047794	0.028717	0.026945	0.035984
	-0.82	0.029038	0.024592	0.0089252	0.028538	0.039428	0.021991	0.02965		0.021659	0.032844	0.02158	0.049748	0.035139	0.022397	0.033136
	-0.81	0.020144	0.027646	0.01894	0.038263	0.044191	0.029039	0.02568		0.02779	0.02964	0.023682	0.052254	0.030036	0.03001	0.030436
	-0.8	0.017913	0.032643	0.020914	0.033238	0.028719	0.019277	0.030048		0.022542	0.025042	0.023095	0.04756	0.037015	0.039102	0.031765
	-0.79	0.024629	0.035589	0.022521	0.033354	0.04059	0.026741	0.03605		0.02362	0.026987	0.022995	0.040854	0.033697	0.038356	0.032396
	-0.78	0.031482	0.026293	0.026438	0.041889	0.036804	0.024078	0.042573		0.025717	0.024363	0.024386	0.031726	0.038599	0.045784	0.031742
	-0.77	0.017383	0.026628	0.018251	0.036316	0.037905	0.022353	0.034348		0.029868	0.023084	0.027391	0.03601	0.038372	0.034789	0.031633
	-0.76	0.021041	0.035615	0.027995	0.033473	0.037674	0.020955	0.038438		0.018688	0.020481	0.03148	0.031975	0.036597	0.035453	0.034083
	-0.75	0.025153	0.037184	0.017257	0.034508	0.025124	0.022393	0.043839		0.020859	0.029409	0.021928	0.037952	0.045502	0.034242	0.036553
	-0.74	0.024519	0.034683	0.027881	0.029643	0.032368	0.017422	0.040121		0.021348	0.026046	0.025065	0.036691	0.036948	0.038607	0.034379
	-0.73	0.022433	0.040841	0.018584	0.028692	0.030357	0.017757	0.043356		0.0202	0.035342	0.03281	0.039513	0.028416	0.031442	0.037617
	-0.72	0.015271	0.048889	0.016593	0.031649	0.024818	0.017852	0.045415		0.024538	0.035145	0.02996	0.04487	0.033014	0.031422	0.037928
	-0.71	0.018057	0.035585	0.022825	0.03331	0.026978	0.015174	0.03631		0.022785	0.029724	0.030933	0.050567	0.027185	0.031186	0.039075
	-0.7	0.021284	0.038813	0.02228	0.031623	0.032094	0.019389	0.034535		0.033175	0.028529	0.026409	0.047003	0.029547	0.024745	0.042817
	-0.69	0.036776	0.029957	0.028404	0.038673	0.041554	0.018061	0.031511		0.024866	0.036841	0.019212	0.050191	0.029195	0.031523	0.042844
	-0.68	0.032115	0.034229	0.017879	0.035936	0.035176	0.02488	0.040603		0.032284	0.032146	0.023899	0.063836	0.034687	0.040353	0.038671
	-0.67	0.027866	0.032522	0.02021	0.036641	0.035619	0.027753	0.037554		0.021457	0.041413	0.034647	0.061822	0.031934	0.03278	0.034081
	-0.66	0.019258	0.025207	0.039399	0.04599	0.035769	0.031779	0.035844		0.042688	0.038839	0.026554	0.052634	0.044571	0.043686	0.030508
	-0.65	0.024462	0.027387	0.020314	0.047205	0.043822	0.032089	0.035005		0.03205	0.030251	0.02331	0.034845	0.037414	0.048719	0.034463
	-0.64	0.029222	0.029203	0.04073	0.046986	0.052298	0.028107	0.040989		0.030348	0.030073	0.028916	0.029707	0.053775	0.047379	0.036317
	-0.63	0.021126	0.029331	0.030111	0.038825	0.036214	0.02531	0.050324		0.021189	0.033984	0.035098	0.034183	0.05197	0.04454	0.036466
	-0.62	0.02636	0.051277	0.022422	0.043576	0.04267	0.027849	0.04136		0.024189	0.026617	0.03434	0.037893	0.053219	0.039676	0.043399
	-0.61	0.025813	0.04819	0.016231	0.03099	0.03502	0.022883	0.050254		0.016231	0.0217	0.030075	0.037034	0.047605	0.040665	0.031522
	-0.6	0.02892	0.0419	0.026129	0.028373	0.035976	0.016576	0.048987		0.031121	0.030103	0.029057	0.034093	0.023547	0.041964	0.040943
	-0.59	0.020531	0.050942	0.043015	0.032604	0.027089	0.023654	0.044442		0.035161	0.025304	0.034431	0.048517	0.029519	0.031755	0.040947
	-0.58	0.020607	0.05396	0.033512	0.032699	0.028512	0.017975	0.040626		0.026734	0.036288	0.032612	0.043861	0.034378	0.030836	0.049676
	-0.57	0.030039	0.04349	0.028801	0.036305	0.033398	0.022015	0.038818		0.028771	0.03888	0.034345	0.057875	0.032871	0.031689	0.048259
	-0.56	0.035314	0.04298	0.029734	0.040688	0.031851	0.02176	0.041909		0.024363	0.036649	0.033173	0.063379	0.024925	0.033053	0.044329
	-0.55	0.039377	0.024365	0.018572	0.042176	0.045863	0.028249	0.038854		0.039238	0.042902	0.038354	0.068092	0.034749	0.045453	0.038111
	-0.54	0.032529	0.026957	0.04783	0.047843	0.029986	0.030203	0.035354		0.037781	0.042471	0.028778	0.077436	0.043156	0.045807	0.037773
	-0.53	0.029561	0.027203	0.037634	0.049643	0.041424	0.036266	0.037545		0.019466	0.03764	0.02546	0.075736	0.044966	0.04883	0.032317
	-0.52	0.028283	0.032249	0.028837	0.052534	0.052958	0.041034	0.041439		0.041207	0.042726	0.026132	0.047858	0.053168	0.048091	0.038799
	-0.51	0.022491	0.030808	0.024763	0.06123	0.053649	0.040829	0.041552		0.045048	0.038897	0.033816	0.033598	0.051196	0.048561	0.035171
	-0.5	0.027983	0.046337	0.031731	0.055984	0.052112	0.036076	0.050374		0.027307	0.047246	0.040071	0.034951	0.062403	0.060899	0.038842
	-0.49	0.036715	0.040235	0.036161	0.050464	0.036576	0.031337	0.058638		0.030989	0.033717	0.025007	0.02724	0.05973	0.051906	0.044112
	-0.48	0.022639	0.052619	0.032473	0.036219	0.049053	0.027668	0.067959		0.031096	0.028239	0.045198	0.028674	0.048613	0.042415	0.045577
	-0.47	0.020512	0.065479	0.030204	0.034739	0.032922	0.021014	0.055908		0.033051	0.025205	0.035288	0.035678	0.043204	0.039193	0.048483
	-0.46	0.04029	0.054727	0.036511	0.037429	0.032624	0.017656	0.06185		0.023241	0.030999	0.035177	0.04122	0.024858	0.037772	0.063349
	-0.45	0.022552	0.051271	0.05733	0.025498	0.035151	0.023114	0.045305		0.029122	0.028781	0.044385	0.04208	0.03752	0.036315	0.057509
	-0.44	0.031587	0.055477	0.063777	0.035766	0.034369	0.026831	0.039656		0.049527	0.050075	0.041481	0.057008	0.026767	0.035168	0.055096
	-0.43	0.039125	0.033148	0.041199	0.04295	0.04163	0.030693	0.039842		0.034536	0.038477	0.034919	0.059793	0.047923	0.043562	0.043582
	-0.42	0.04728	0.028603	0.038451	0.04152	0.051976	0.032308	0.035028		0.037732	0.035764	0.032173	0.074396	0.032352	0.044134	0.032292
	-0.41	0.054178	0.034724	0.035417	0.054551	0.043404	0.040112	0.033668		0.04568	0.044298	0.035812	0.092712	0.043842	0.054058	0.035839
	-0.4	0.042421	0.032924	0.036307	0.066554	0.056396	0.04424	0.039215		0.037172	0.047285	0.031741	0.098451	0.063311	0.054963	0.031789
	-0.39	0.039905	0.045979	0.044757	0.060924	0.057466	0.047688	0.038107		0.051044	0.050913	0.026103	0.069205	0.059537	0.065667	0.039607
	-0.38	0.034888	0.04831	0.035408	0.071234	0.063071	0.063439	0.047144		0.043331	0.047847	0.036658	0.041391	0.065428	0.065018	0.034704
	-0.37	0.026455	0.057162	0.020293	0.051243	0.060059	0.048839	0.06114		0.027281	0.036488	0.035802	0.037128	0.068165	0.065043	0.042659
	-0.36	0.036577	0.066061	0.043071	0.048935	0.048217	0.036415	0.073509		0.036022	0.035749	0.039312	0.029287	0.062806	0.06063	0.048523
	-0.35	0.024368	0.057581	0.040065	0.038301	0.036563	0.019682	0.073135		0.03223	0.028125	0.041823	0.025917	0.041859	0.035827	0.067067
	-0.34	0.030224	0.054663	0.056416	0.037965	0.026172	0.022012	0.06828		0.030234	0.042217	0.047863	0.027629	0.027335	0.02988	0.08011
	-0.33	0.020838	0.05253	0.047746	0.043861	0.016236	0.01746	0.054359		0.022863	0.053025	0.045673	0.036276	0.02825	0.031525	0.065076
	-0.32	0.027804	0.045865	0.058564	0.046693	0.035582	0.021033	0.044066		0.029345	0.049787	0.044125	0.04709	0.036776	0.036479	0.060491
	-0.31	0.029025	0.025824	0.060949	0.044299	0.037996	0.026915	0.049719		0.028093	0.046936	0.0465	0.051896	0.035545	0.041976	0.04715
	-0.3	0.042694	0.038307	0.060028	0.047862	0.049835	0.04132	0.045195		0.047222	0.046588	0.051301	0.071081	0.051009	0.05536	0.042773
	-0.29	0.047109	0.040136	0.056051	0.051906	0.064967	0.052634	0.053769		0.065155	0.053704	0.051934	0.081718	0.056878	0.058375	0.047104
	-0.28	0.066076	0.038928	0.04165	0.069092	0.082045	0.058853	0.043748		0.050461	0.056208	0.062459	0.10201	0.04996	0.070866	0.043584
	-0.27	0.063184	0.067612	0.044214	0.088195	0.071773	0.06995	0.052968		0.057744	0.058055	0.030924	0.13076	0.086041	0.084895	0.043063
	-0.26	0.060526	0.065981	0.05212	0.09743	0.09456	0.073217	0.046998		0.049393	0.061937	0.044859	0.098807	0.088617	0.092123	0.047634
	-0.25	0.046911	0.074598	0.046697	0.073938	0.07678	0.06751	0.069475		0.065971	0.046964	0.033542	0.04062	0.10821	0.097441	0.049652
	-0.24	0.041473	0.091731	0.069352	0.052104	0.068762	0.061641	0.077533		0.050997	0.022089	0.035505	0.02442	0.081099	0.073137	0.07108
	-0.23	0.035527	0.076359	0.046465	0.019421	0.041447	0.037142	0.091362		0.036426	0.012233	0.033297	0.0095409	0.047324	0.0457	0.088486
	-0.22	0.022585	0.05079	0.047716	0.014588	0.0068381	0.0089703	0.051005		0.028504	0.018425	0.039367	0.0099104	0.014835	0.023046	0.078309
	-0.21	0.012953	0.038819	0.064171	0.011809	0.0071745	0.013256	0.031914		0.0050539	0.014999	0.042591	0.015563	0.01385	0.0082064	0.043835
	-0.2	0.009266	0.018824	0.066304	0.015593	0.011493	0.0080734	0.018388		0.012759	0.018728	0.024137	0.022133	0.01041	0.013099	0.019857
	-0.19	0.019947	0.011532	0.031452	0.031648	0.014876	0.016446	0.024663		0.0067984	0.038779	0.031038	0.033239	0.015346	0.017025	0.023165
	-0.18	0.018283	0.022834	0.033991	0.050624	0.020465	0.020356	0.036071		0.022938	0.058868	0.036193	0.051136	0.025001	0.032761	0.036494
	-0.17	0.040158	0.025671	0.032837	0.077735	0.036891	0.040425	0.055556		0.039235	0.083138	0.059115	0.063242	0.029309	0.04412	0.054235
	-0.16	0.057149	0.043467	0.042654	0.096727	0.069011	0.064643	0.080297		0.060254	0.091936	0.088046	0.090963	0.06863	0.070362	0.068443
	-0.15	0.090525	0.075938	0.064262	0.097819	0.12065	0.10044	0.095324		0.11712	0.1179	0.10041	0.14167	0.086701	0.11055	0.084328
	-0.14	0.1374	0.097723	0.11537	0.14452	0.15037	0.12816	0.11385		0.13007	0.11817	0.10669	0.20809	0.1526	0.1494	0.095471
	-0.13	0.13044	0.13933	0.1012	0.19843	0.1883	0.15537	0.11104		0.1332	0.13542	0.094242	0.1991	0.18954	0.19655	0.10251
	-0.12	0.091775	0.19352	0.15242	0.096286	0.13981	0.11519	0.16498		0.092875	0.056032	0.079549	0.051967	0.15731	0.14368	0.15086
	-0.11	0.049854	0.10413	0.10754	0.030524	0.040027	0.044418	0.1143		0.070507	0.013048	0.065554	0.0093732	0.064623	0.061158	0.14509
	-0.1	0.018472	0.041466	0.081157	0.0037194	0.0073696	0.0070072	0.020669		0.010678	0.003061	0.035804	0.00030713	0.0077984	0.015639	0.047753
	-0.09	0.0033482	0.007802	0.0436	0.0003627	0.0023313	0.0011843	0.0041622		0.0014514	-4.5358e-18	0.013017	0.00029377	0.0014093	0.0059829	0.0054007
	-0.08	-1.4004e-18	0.0021636	0.011351	8.7928e-05	-2.117e-19	0.00064433	0.00027627		3.3187e-18	1.2012e-18	0.0025316	-8.1103e-19	0.0021766	0.0048673	0.0015042
	-0.07	-3.547e-18	0.0014118	0.002935	7.8672e-05	0.00062657	1.0896e-19	-4.3881e-18		8.8496e-19	-1.5271e-18	-2.123e-18	-2.5335e-18	-3.6133e-18	0.00046151	0.0011961
	-0.06	-4.095e-18	-5.0189e-19	-4.1166e-19	-6.1308e-18	-4.8298e-18	-4.8635e-18	0.00012171		-1.784e-18	-2.2737e-18	-1.8376e-18	-7.4727e-18	-4.446e-18	-4.7647e-18	0.00045227
	-0.05	2.6549e-18	0.0019832	1.1599e-18	1.5074e-18	1.9895e-18	3.1179e-18	1.2076e-18		4.8801e-19	1.8989e-18	-8.8492e-19	3.8216e-18	2.0705e-18	2.402e-18	1.8343e-18
	-0.04	-8.6867e-18	-1.2956e-17	-5.2392e-18	0.00017586	-9.9257e-18	-1.081e-17	0.00017581		-1.1765e-17	-1.1787e-17	-8.7281e-18	-9.545e-18	-1.0119e-17	0.00027139	0.00049116
	-0.03	-1.2901e-18	-8.2215e-19	1.4668e-18	0.00045063	0.0012646	-6.0071e-19	0.00073377		-1.8141e-18	-4.7951e-19	-1.6356e-18	1.7495e-19	-9.7261e-19	0.0035356	0.0024668
	-0.02	8.1206e-19	0.00084034	2.1725e-18	0.00059416	0.0024217	-1.2505e-19	0.0018254		-9.6544e-19	0.0026847	-1.7086e-18	9.4882e-19	0.0037481	0.0090191	0.0057252
	-0.01	-2.3658e-18	0.00084034	-2.2675e-18	0.00056693	0.00050607	-2.5956e-18	0.0012841		-3.5568e-18	0.0037162	1.0879e-18	-3.1239e-18	0.0015198	0.0023983	0.00065007
	0
	0.01	-3.4169e-18	0.00084034	-3.9383e-18	0.00056693	0.00050607	-2.8662e-18	0.0012841		-3.793e-18	0.0037162	3.2674e-19	-3.5682e-18	0.0015198	0.0023983	0.00065007
	0.02	-2.1042e-19	0.00084034	1.6752e-18	0.00059416	0.0024217	-3.5146e-19	0.0018254		-2.0018e-18	0.0026847	-1.3239e-18	1.7843e-18	0.0037481	0.0090191	0.0057252
	0.03	8.6769e-20	3.3161e-20	2.1858e-18	0.00045063	0.0012646	1.6002e-19	0.00073377		2.1399e-19	1.3658e-18	-7.9276e-19	1.647e-18	5.7471e-19	0.0035356	0.0024668
	0.04	-7.0097e-18	-1.0121e-17	-4.8274e-18	0.00017586	-6.6795e-18	-8.6695e-18	0.00017581		-1.0492e-17	-1.0156e-17	-1.025e-17	-6.5657e-18	-8.354e-18	0.00027139	0.00049116
	0.05	3.8978e-18	0.0019832	1.5173e-18	2.3167e-18	2.6299e-18	2.936e-18	1.6579e-18		9.9863e-19	1.2004e-18	-3.8742e-19	5.2093e-18	2.4001e-18	2.8797e-18	2.0541e-18
	0.06	-5.4946e-18	1.2202e-18	6.2883e-20	-5.727e-18	-4.4734e-18	-4.3205e-18	0.00012171		-2.712e-18	-1.2415e-18	-1.648e-18	-5.6579e-18	-4.4734e-18	-4.6466e-18	0.00045227
	0.07	-3.1894e-18	0.0014118	0.002935	7.8672e-05	0.00062657	1.4735e-19	-3.767e-18		3.7044e-19	-2.051e-19	-2.7852e-18	-2.1025e-18	-2.5057e-18	0.00046151	0.0011961
	0.08	-1.5893e-19	0.0021636	0.011351	8.7928e-05	1.0602e-18	0.00064433	0.00027627		4.1025e-18	1.6734e-18	0.0025316	-4.8648e-19	0.0021766	0.0048673	0.0015042
	0.09	0.0033482	0.007802	0.0436	0.0003627	0.0023313	0.0011843	0.0041622		0.0014514	-3.2814e-18	0.013017	0.00029377	0.0014093	0.0059829	0.0054007
	0.1	0.018472	0.041466	0.081157	0.0037194	0.0073696	0.0070072	0.020669		0.010678	0.003061	0.035804	0.00030713	0.0077984	0.015639	0.047753
	0.11	0.049854	0.10413	0.10754	0.030524	0.040027	0.044418	0.1143		0.070507	0.013048	0.065554	0.0093732	0.064623	0.061158	0.14509
	0.12	0.091775	0.19352	0.15242	0.096286	0.13981	0.11519	0.16498		0.092875	0.056032	0.079549	0.051967	0.15731	0.14368	0.15086
	0.13	0.13044	0.13933	0.1012	0.19843	0.1883	0.15537	0.11104		0.1332	0.13542	0.094242	0.1991	0.18954	0.19655	0.10251
	0.14	0.1374	0.097723	0.11537	0.14452	0.15037	0.12816	0.11385		0.13007	0.11817	0.10669	0.20809	0.1526	0.1494	0.095471
	0.15	0.090525	0.075938	0.064262	0.097819	0.12065	0.10044	0.095324		0.11712	0.1179	0.10041	0.14167	0.086701	0.11055	0.084328
	0.16	0.057149	0.043467	0.042654	0.096727	0.069011	0.064643	0.080297		0.060254	0.091936	0.088046	0.090963	0.06863	0.070362	0.068443
	0.17	0.040158	0.025671	0.032837	0.077735	0.036891	0.040425	0.055556		0.039235	0.083138	0.059115	0.063242	0.029309	0.04412	0.054235
	0.18	0.018283	0.022834	0.033991	0.050624	0.020465	0.020356	0.036071		0.022938	0.058868	0.036193	0.051136	0.025001	0.032761	0.036494
	0.19	0.019947	0.011532	0.031452	0.031648	0.014876	0.016446	0.024663		0.0067984	0.038779	0.031038	0.033239	0.015346	0.017025	0.023165
	0.2	0.009266	0.018824	0.066304	0.015593	0.011493	0.0080734	0.018388		0.012759	0.018728	0.024137	0.022133	0.01041	0.013099	0.019857
	0.21	0.012953	0.038819	0.064171	0.011809	0.0071745	0.013256	0.031914		0.0050539	0.014999	0.042591	0.015563	0.01385	0.0082064	0.043835
	0.22	0.022585	0.05079	0.047716	0.014588	0.0068381	0.0089703	0.051005		0.028504	0.018425	0.039367	0.0099104	0.014835	0.023046	0.078309
	0.23	0.035527	0.076359	0.046465	0.019421	0.041447	0.037142	0.091362		0.036426	0.012233	0.033297	0.0095409	0.047324	0.0457	0.088486
	0.24	0.041473	0.091731	0.069352	0.052104	0.068762	0.061641	0.077533		0.050997	0.022089	0.035505	0.02442	0.081099	0.073137	0.07108
	0.25	0.046911	0.074598	0.046697	0.073938	0.07678	0.06751	0.069475		0.065971	0.046964	0.033542	0.04062	0.10821	0.097441	0.049652
	0.26	0.060526	0.065981	0.05212	0.09743	0.09456	0.073217	0.046998		0.049393	0.061937	0.044859	0.098807	0.088617	0.092123	0.047634
	0.27	0.063184	0.067612	0.044214	0.088195	0.071773	0.06995	0.052968		0.057744	0.058055	0.030924	0.13076	0.086041	0.084895	0.043063
	0.28	0.066076	0.038928	0.04165	0.069092	0.082045	0.058853	0.043748		0.050461	0.056208	0.062459	0.10201	0.04996	0.070866	0.043584
	0.29	0.047109	0.040136	0.056051	0.051906	0.064967	0.052634	0.053769		0.065155	0.053704	0.051934	0.081718	0.056878	0.058375	0.047104
	0.3	0.042694	0.038307	0.060028	0.047862	0.049835	0.04132	0.045195		0.047222	0.046588	0.051301	0.071081	0.051009	0.05536	0.042773
	0.31	0.029025	0.025824	0.060949	0.044299	0.037996	0.026915	0.049719		0.028093	0.046936	0.0465	0.051896	0.035545	0.041976	0.04715
	0.32	0.027804	0.045865	0.058564	0.046693	0.035582	0.021033	0.044066		0.029345	0.049787	0.044125	0.04709	0.036776	0.036479	0.060491
	0.33	0.020838	0.05253	0.047746	0.043861	0.016236	0.01746	0.054359		0.022863	0.053025	0.045673	0.036276	0.02825	0.031525	0.065076
	0.34	0.030224	0.054663	0.056416	0.037965	0.026172	0.022012	0.06828		0.030234	0.042217	0.047863	0.027629	0.027335	0.02988	0.08011
	0.35	0.024368	0.057581	0.040065	0.038301	0.036563	0.019682	0.073135		0.03223	0.028125	0.041823	0.025917	0.041859	0.035827	0.067067
	0.36	0.036577	0.066061	0.043071	0.048935	0.048217	0.036415	0.073509		0.036022	0.035749	0.039312	0.029287	0.062806	0.06063	0.048523
	0.37	0.026455	0.057162	0.020293	0.051243	0.060059	0.048839	0.06114		0.027281	0.036488	0.035802	0.037128	0.068165	0.065043	0.042659
	0.38	0.034888	0.04831	0.035408	0.071234	0.063071	0.063439	0.047144		0.043331	0.047847	0.036658	0.041391	0.065428	0.065018	0.034704
	0.39	0.039905	0.045979	0.044757	0.060924	0.057466	0.047688	0.038107		0.051044	0.050913	0.026103	0.069205	0.059537	0.065667	0.039607
	0.4	0.042421	0.032924	0.036307	0.066554	0.056396	0.04424	0.039215		0.037172	0.047285	0.031741	0.098451	0.063311	0.054963	0.031789
	0.41	0.054178	0.034724	0.035417	0.054551	0.043404	0.040112	0.033668		0.04568	0.044298	0.035812	0.092712	0.043842	0.054058	0.035839
	0.42	0.04728	0.028603	0.038451	0.04152	0.051976	0.032308	0.035028		0.037732	0.035764	0.032173	0.074396	0.032352	0.044134	0.032292
	0.43	0.039125	0.033148	0.041199	0.04295	0.04163	0.030693	0.039842		0.034536	0.038477	0.034919	0.059793	0.047923	0.043562	0.043582
	0.44	0.031587	0.055477	0.063777	0.035766	0.034369	0.026831	0.039656		0.049527	0.050075	0.041481	0.057008	0.026767	0.035168	0.055096
	0.45	0.022552	0.051271	0.05733	0.025498	0.035151	0.023114	0.045305		0.029122	0.028781	0.044385	0.04208	0.03752	0.036315	0.057509
	0.46	0.04029	0.054727	0.036511	0.037429	0.032624	0.017656	0.06185		0.023241	0.030999	0.035177	0.04122	0.024858	0.037772	0.063349
	0.47	0.020512	0.065479	0.030204	0.034739	0.032922	0.021014	0.055908		0.033051	0.025205	0.035288	0.035678	0.043204	0.039193	0.048483
	0.48	0.022639	0.052619	0.032473	0.036219	0.049053	0.027668	0.067959		0.031096	0.028239	0.045198	0.028674	0.048613	0.042415	0.045577
	0.49	0.036715	0.040235	0.036161	0.050464	0.036576	0.031337	0.058638		0.030989	0.033717	0.025007	0.02724	0.05973	0.051906	0.044112
	0.5	0.027983	0.046337	0.031731	0.055984	0.052112	0.036076	0.050374		0.027307	0.047246	0.040071	0.034951	0.062403	0.060899	0.038842
	0.51	0.022491	0.030808	0.024763	0.06123	0.053649	0.040829	0.041552		0.045048	0.038897	0.033816	0.033598	0.051196	0.048561	0.035171
	0.52	0.028283	0.032249	0.028837	0.052534	0.052958	0.041034	0.041439		0.041207	0.042726	0.026132	0.047858	0.053168	0.048091	0.038799
	0.53	0.029561	0.027203	0.037634	0.049643	0.041424	0.036266	0.037545		0.019466	0.03764	0.02546	0.075736	0.044966	0.04883	0.032317
	0.54	0.032529	0.026957	0.04783	0.047843	0.029986	0.030203	0.035354		0.037781	0.042471	0.028778	0.077436	0.043156	0.045807	0.037773
	0.55	0.039377	0.024365	0.018572	0.042176	0.045863	0.028249	0.038854		0.039238	0.042902	0.038354	0.068092	0.034749	0.045453	0.038111
	0.56	0.035314	0.04298	0.029734	0.040688	0.031851	0.02176	0.041909		0.024363	0.036649	0.033173	0.063379	0.024925	0.033053	0.044329
	0.57	0.030039	0.04349	0.028801	0.036305	0.033398	0.022015	0.038818		0.028771	0.03888	0.034345	0.057875	0.032871	0.031689	0.048259
	0.58	0.020607	0.05396	0.033512	0.032699	0.028512	0.017975	0.040626		0.026734	0.036288	0.032612	0.043861	0.034378	0.030836	0.049676
	0.59	0.020531	0.050942	0.043015	0.032604	0.027089	0.023654	0.044442		0.035161	0.025304	0.034431	0.048517	0.029519	0.031755	0.040947
	0.6	0.02892	0.0419	0.026129	0.028373	0.035976	0.016576	0.048987		0.031121	0.030103	0.029057	0.034093	0.023547	0.041964	0.040943
	0.61	0.025813	0.04819	0.016231	0.03099	0.03502	0.022883	0.050254		0.016231	0.0217	0.030075	0.037034	0.047605	0.040665	0.031522
	0.62	0.02636	0.051277	0.022422	0.043576	0.04267	0.027849	0.04136		0.024189	0.026617	0.03434	0.037893	0.053219	0.039676	0.043399
	0.63	0.021126	0.029331	0.030111	0.038825	0.036214	0.02531	0.050324		0.021189	0.033984	0.035098	0.034183	0.05197	0.04454	0.036466
	0.64	0.029222	0.029203	0.04073	0.046986	0.052298	0.028107	0.040989		0.030348	0.030073	0.028916	0.029707	0.053775	0.047379	0.036317
	0.65	0.024462	0.027387	0.020314	0.047205	0.043822	0.032089	0.035005		0.03205	0.030251	0.02331	0.034845	0.037414	0.048719	0.034463
	0.66	0.019258	0.025207	0.039399	0.04599	0.035769	0.031779	0.035844		0.042688	0.038839	0.026554	0.052634	0.044571	0.043686	0.030508
	0.67	0.027866	0.032522	0.02021	0.036641	0.035619	0.027753	0.037554		0.021457	0.041413	0.034647	0.061822	0.031934	0.03278	0.034081
	0.68	0.032115	0.034229	0.017879	0.035936	0.035176	0.02488	0.040603		0.032284	0.032146	0.023899	0.063836	0.034687	0.040353	0.038671
	0.69	0.036776	0.029957	0.028404	0.038673	0.041554	0.018061	0.031511		0.024866	0.036841	0.019212	0.050191	0.029195	0.031523	0.042844
	0.7	0.021284	0.038813	0.02228	0.031623	0.032094	0.019389	0.034535		0.033175	0.028529	0.026409	0.047003	0.029547	0.024745	0.042817
	0.71	0.018057	0.035585	0.022825	0.03331	0.026978	0.015174	0.03631		0.022785	0.029724	0.030933	0.050567	0.027185	0.031186	0.039075
	0.72	0.015271	0.048889	0.016593	0.031649	0.024818	0.017852	0.045415		0.024538	0.035145	0.02996	0.04487	0.033014	0.031422	0.037928
	0.73	0.022433	0.040841	0.018584	0.028692	0.030357	0.017757	0.043356		0.0202	0.035342	0.03281	0.039513	0.028416	0.031442	0.037617
	0.74	0.024519	0.034683	0.027881	0.029643	0.032368	0.017422	0.040121		0.021348	0.026046	0.025065	0.036691	0.036948	0.038607	0.034379
	0.75	0.025153	0.037184	0.017257	0.034508	0.025124	0.022393	0.043839		0.020859	0.029409	0.021928	0.037952	0.045502	0.034242	0.036553
	0.76	0.021041	0.035615	0.027995	0.033473	0.037674	0.020955	0.038438		0.018688	0.020481	0.03148	0.031975	0.036597	0.035453	0.034083
	0.77	0.017383	0.026628	0.018251	0.036316	0.037905	0.022353	0.034348		0.029868	0.023084	0.027391	0.03601	0.038372	0.034789	0.031633
	0.78	0.031482	0.026293	0.026438	0.041889	0.036804	0.024078	0.042573		0.025717	0.024363	0.024386	0.031726	0.038599	0.045784	0.031742
	0.79	0.024629	0.035589	0.022521	0.033354	0.04059	0.026741	0.03605		0.02362	0.026987	0.022995	0.040854	0.033697	0.038356	0.032396
	0.8	0.017913	0.032643	0.020914	0.033238	0.028719	0.019277	0.030048		0.022542	0.025042	0.023095	0.04756	0.037015	0.039102	0.031765
	0.81	0.020144	0.027646	0.01894	0.038263	0.044191	0.029039	0.02568		0.02779	0.02964	0.023682	0.052254	0.030036	0.03001	0.030436
	0.82	0.029038	0.024592	0.0089252	0.028538	0.039428	0.021991	0.02965		0.021659	0.032844	0.02158	0.049748	0.035139	0.022397	0.033136
	0.83	0.025422	0.035064	0.030523	0.027568	0.026577	0.016401	0.035192		0.027603	0.031776	0.025898	0.047794	0.028717	0.026945	0.035984
	0.84	0.018437	0.032078	0.01275	0.03685	0.02725	0.016695	0.027129		0.032449	0.026073	0.02883	0.044488	0.025182	0.021805	0.036361
	0.85	0.018165	0.033777	0.018948	0.030382	0.02854	0.015408	0.035969		0.030371	0.02858	0.021149	0.040223	0.025999	0.030364	0.034327
	0.86	0.011707	0.030897	0.0085488	0.026557	0.025847	0.01142	0.034895		0.019279	0.028643	0.028915	0.044295	0.030263	0.029033	0.033401
	0.87	0.019925	0.028966	0.01237	0.026603	0.022033	0.016291	0.035027		0.018561	0.026526	0.021963	0.031616	0.029267	0.030952	0.037082
	0.88	0.015171	0.03292	0.027207	0.026509	0.031234	0.017831	0.035571		0.018451	0.025152	0.026656	0.032956	0.034749	0.028209	0.030161
	0.89	0.028458	0.025784	0.017532	0.026417	0.025481	0.01326	0.04403		0.0099134	0.030039	0.019107	0.028894	0.032687	0.033693	0.030868
	0.9	0.020053	0.02511	0.01902	0.034069	0.030293	0.019859	0.039393		0.029583	0.025137	0.022615	0.03669	0.027027	0.033176	0.037644
	0.91	0.022483	0.034045	0.018206	0.028098	0.032025	0.023906	0.035953		0.019452	0.017591	0.02303	0.034852	0.031727	0.031833	0.034374
	0.92	0.017959	0.0269	0.011435	0.030594	0.035438	0.017561	0.032848		0.031647	0.020074	0.018928	0.029289	0.035454	0.036163	0.029382
	0.93	0.016491	0.029534	0.011177	0.028948	0.038877	0.020281	0.028074		0.031215	0.027589	0.023301	0.036125	0.029964	0.032598	0.030883
	0.94	0.020893	0.0282	0.01653	0.027232	0.031273	0.023308	0.028567		0.0091968	0.023483	0.022277	0.040452	0.032477	0.027875	0.029855
	0.95	0.022632	0.025322	0.015437	0.030712	0.02613	0.018578	0.026475		0.01877	0.023538	0.026774	0.051322	0.024591	0.02522	0.030653
	0.96	0.014579	0.024348	0.01198	0.030919	0.036875	0.019241	0.028227		0.013359	0.025031	0.01403	0.037251	0.033279	0.023318	0.027486
	0.97	0.015259	0.026282	0.02734	0.02809	0.030385	0.019397	0.026173		0.023357	0.021801	0.021916	0.043892	0.029378	0.021886	0.031409
	0.98	0.021857	0.034517	0.012588	0.031645	0.027242	0.016637	0.028971		0.029086	0.017156	0.026445	0.044442	0.026533	0.022667	0.028246
	0.99	0.011506	0.021666	0.017125	0.024267	0.015758	0.011525	0.030456		0.020728	0.025008	0.026934	0.034899	0.023812	0.025734	0.030307
	1	0.013964	0.023906	0.0090226	0.027	0.017698	0.010505	0.028055		0.021217	0.029979	0.022023	0.039956	0.024313	0.024793	0.032635
Panel C		Mouse 1	Mouse 2	Mouse 3	Mouse 4	Mouse 5	Mouse 6	Mouse 7		Mouse 1	Mouse 2	Mouse 3	Mouse 4	Mouse 5	Mouse 6	Mouse 7
		0.39018	0.10062	0.43079	0.074112	0.2224	0.15625	0.089138		0.50211	0.13643	0.20945	0.07074	0.19722	0.093649	0.08163
