# Supplementary material for: Inhibition gates supralinear Ca2+ signaling in Purkinje cell dendrites during practiced movements
Source: eLife. 2018 Aug 17;7:e36246. doi: 10.7554/eLife.36246 (PMC6120752; doi:10.7554/eLife.36246)
Supplement: Figure 2—source data 1. [file elife-36246-fig2-data1.xlsx]

## Sheet: Figure 2
Panel C		Control								CNO
	Time	Mouse 1	Mouse 2	Mouse 3	Mouse 4	Mouse 5	Mouse 6	Mouse 7		Mouse 1	Mouse 2	Mouse 3	Mouse 4	Mouse 5	Mouse 6	Mouse 7
	-0.2338	-0.00142034	-0.00214698	0.00133554	-0.00073239	-0.000387926	-0.00143167	0.00217684		0.00234464	-0.00352591	-0.00383145	-0.000474413	0.000686236	-0.00121746	-0.00107251
	-0.2004	-0.00458238	-0.0055981	0.00228641	-0.000995314	-0.00487909	0.000625637	-0.000909435		-0.00124168	-0.00121569	-0.00278677	-0.00356284	0.000235608	-0.00226217	-0.00408755
	-0.167	-0.00568192	-0.000425699	-0.00391732	-0.00101284	-0.00196605	0.00046276	-0.00246181		-4.92968e-05	-0.00183428	-0.000757283	-0.00548996	4.21084e-06	-8.41112e-05	-0.00825242
	-0.1336	-0.000564092	0.000698241	-0.00376622	-0.00261161	-0.00099155	0.000155218	-0.00260095		0.00300835	0.00237225	-0.00371836	-0.00316921	-0.0020352	0.00139339	-0.00528214
	-0.1002	-0.00590107	-0.00163996	0.00216341	-0.00247334	0.000345203	0.000145437	-0.00946284		0.0104882	0.00361262	-0.00502408	-1.04123e-05	0.00433994	0.00497465	-0.00371
	-0.0668	-0.00567241	-0.000197561	-0.00732482	-0.0026049	0.00119352	-0.00196307	-0.0127688		0.0131804	0.00781735	-0.00523795	0.00667164	0.00964561	0.0182069	8.69769e-05
	-0.0334	-0.00416546	0.00490127	-0.0121747	-0.000636963	0.00216632	0.00135615	-0.0293661		0.029488	0.0182643	0.00904954	0.026847	0.0300937	0.057655	0.0319824
	0	0.20664	0.257791	0.202124	0.223753	0.240483	0.244221	0.187211		0.336316	0.295812	0.25693	0.336437	0.358461	0.449754	0.353687
	0.0334	0.169284	0.214891	0.159475	0.198434	0.209918	0.207768	0.127139		0.310269	0.265691	0.221336	0.317009	0.335563	0.418169	0.32123
	0.0668	0.129101	0.159469	0.119903	0.153452	0.160474	0.154762	0.0867568		0.235454	0.202463	0.171208	0.250185	0.262208	0.325418	0.244198
	0.1002	0.0906796	0.114725	0.0811676	0.115795	0.118919	0.111077	0.0618627		0.168851	0.148324	0.125864	0.189336	0.193379	0.240381	0.183243
	0.1336	0.0636893	0.0756231	0.0560395	0.0831219	0.0827359	0.0786728	0.0454567		0.121641	0.108876	0.0917668	0.140341	0.139158	0.176111	0.135124
	0.167	0.0414458	0.0508901	0.038415	0.0591166	0.0574321	0.056787	0.0296619		0.0856522	0.0763943	0.0611001	0.10294	0.0978581	0.125856	0.100027
	0.2004	0.02499	0.0332919	0.0317063	0.0415703	0.0378177	0.0390248	0.0177531		0.0612639	0.0501697	0.0463686	0.0720574	0.0670523	0.086603	0.0723722
	0.2338	0.0146956	0.0194959	4.84975e-05	0.0248315	0.0280049	0.0265918	0.0104404		0.0464179	0.0304	0.0294854	0.0488114	0.0478482	0.0597667	0.0495797
	0.2672	0.00802515	0.00989211	0.00302246	0.0149015	0.0153119	0.0186852	0.00507447		0.0327557	0.019411	0.0231196	0.0337001	0.0315566	0.0366226	0.0321688
	0.3006	0.00915485	0.00363684	-0.00265469	0.00656926	0.010691	0.0119055	-0.000960375		0.0200382	0.0126171	0.0185192	0.0234806	0.0161674	0.0233363	0.0201117
	0.334	0.00405221	-0.00186461	-0.000513735	0.0010715	0.0046811	0.00482622	-0.00369757		0.00874493	0.00332251	0.0130288	0.0154925	0.00899715	0.0147618	0.017248
	0.3674	0.000485019	-0.00906842	-0.0124055	-0.000482424	0.000382472	0.00227222	-0.00598734		0.00309639	-0.000409043	0.00165217	0.00902596	0.00470755	0.00552557	0.0119226
	0.4008	-0.0086223	-0.0133126	-0.00975967	-0.00480492	-0.00409575	6.49979e-05	-0.00194755		0.00342887	-0.00149536	-0.00266418	0.00290985	-0.000777897	-0.00213952	0.0116145
	0.4342	-0.00778786	-0.0152452	-0.0108205	-0.00822923	-0.00618526	-0.00288757	-0.00396227		-0.0013976	-0.00723902	0.000101485	-0.00304689	-0.00522334	-0.00893395	0.00717525
	0.4676	-0.00808925	-0.0151483	-0.012805	-0.0104482	-0.00631484	-0.00563983	-0.00179399		-0.00160332	-0.0105792	-0.00524071	-0.00713172	-0.00902285	-0.0136259	0.0062966
	0.5	-0.0139176	-0.0146521	-0.0085659	-0.011589	-0.00442257	-0.00763194	-0.0112482		-0.0018612	-0.0125258	-0.00821924	-0.0110692	-0.0125851	-0.0118369	0.00120565
Panel D	Time	Mouse 1	Mouse 2	Mouse 3	Mouse 4	Mouse 5	Mouse 6	Mouse 7		Mouse 1	Mouse 2	Mouse 3	Mouse 4	Mouse 5	Mouse 6	Mouse 7
	-0.2338	-0.00104929	-0.00154014	-0.00443033	0.000875575	-0.00200655	-0.000262824	0.0003897		0.00455854	-0.000354689	0.000344863	-0.0042823	0.00189572	-0.00225668	0.000378577
	-0.2004	0.000249988	-0.00297782	0.00209587	-9.02134e-05	-0.00305278	0.0018149	0.0142525		0.00315173	0.000552202	0.000231405	-0.000310311	-0.000729942	-0.00147312	-0.000567864
	-0.167	-0.00122201	-0.0026659	0.0179484	0.00233895	-0.00117035	-0.00136764	-0.000192813		0.00315869	-0.000951199	-0.00272287	0.00283208	-0.00334377	-0.000410178	-0.0021806
	-0.1336	-0.000870219	0.00762352	-0.00158918	-0.00365357	-0.00433519	0.00061492	-0.00687179		-0.00467231	-0.000437697	-0.00678627	0.00219773	-0.00483907	0.000967615	0.00222017
	-0.1002	0.000183009	-0.00709878	0.00503799	-0.00304734	-0.00391183	-0.00431423	0.0105809		-0.00222395	-0.00182981	-0.00451903	0.00133712	-0.00371563	0.00244818	0.00375061
	-0.0668	0.000958822	-0.00692936	-0.00135975	-0.00786853	-0.0100878	-0.0109959	-0.02118		-0.0115843	0.000363719	-0.00484073	-0.00282661	-0.0017216	0.00672199	0.00813195
	-0.0334	-0.00635563	-0.0140895	-0.00300281	-0.0120064	-0.0100924	-0.0157453	-0.0482025		-0.00656226	-0.00285625	-0.0241128	0.00399379	0.00206997	0.0153887	0.00729393
	0	0.181267	0.21078	0.24201	0.156197	0.240146	0.176829	0.149925		0.220935	0.183901	0.12676	0.209874	0.229274	0.278808	0.205897
	0.0334	0.146961	0.172877	0.204863	0.12563	0.207569	0.132044	0.0887625		0.18939	0.152244	0.0964158	0.180373	0.204038	0.247401	0.166418
	0.0668	0.108446	0.13372	0.152531	0.100622	0.15641	0.0958599	0.0323959		0.134707	0.119514	0.0654386	0.141752	0.161878	0.192719	0.127918
	0.1002	0.0779744	0.0934341	0.0995201	0.0732527	0.115548	0.071548	0.0144071		0.0938204	0.0882006	0.0499592	0.107029	0.12191	0.140664	0.0898036
	0.1336	0.0522488	0.0702383	0.0750896	0.0539188	0.0746013	0.0547145	0.0170118		0.0658351	0.0605125	0.0333362	0.0818695	0.0932665	0.10156	0.0629796
	0.167	0.0365505	0.0424869	0.0610804	0.0362071	0.0530984	0.0317559	0.0323808		0.0484792	0.0433941	0.0305475	0.0563473	0.0690198	0.0704135	0.0456888
	0.2004	0.0202773	0.031472	0.0352097	0.0254336	0.0351425	0.0194645	0.0146814		0.0306695	0.0258123	0.0204227	0.0420492	0.0459553	0.0469243	0.0297474
	0.2338	0.0132147	0.0203024	0.0315532	0.0217212	0.0251586	0.0130481	-0.00563433		0.0236336	0.0192429	0.0166844	0.030787	0.0330776	0.0335266	0.018747
	0.2672	0.00303107	0.00984833	0.0170935	0.0168765	0.0144037	0.00533532	0.00787724		0.0190614	0.0203623	0.0110093	0.0172743	0.02513	0.0205525	0.0160986
	0.3006	0.00554999	0.0048436	0.0112552	0.0097506	0.0134881	0.00446944	0.00287536		0.00681431	0.00739449	0.00607578	0.00803414	0.0139762	0.0158772	0.0127819
	0.334	0.00261966	0.00998524	0.00367394	0.00204744	0.00735657	0.00430613	0.0106941		0.0035912	0.00609062	0.00358871	0.00414302	0.00738768	0.00844619	0.00948995
	0.3674	0.00058572	0.00553268	0.00428093	0.00994384	0.00712049	-0.000227115	-0.0135142		0.00157926	-0.00117404	0.000818374	0.00258129	0.00196783	0.00858627	0.00949076
	0.4008	-0.000827428	0.0049121	0.00755051	0.00675894	0.00543523	0.0012054	0.00156008		0.00375605	-0.00151395	-0.00118387	-0.00107679	0.00398744	0.0059902	0.0087952
	0.4342	-0.00509065	-0.00362189	0.00891455	0.00367306	0.00289862	0.00236777	-0.0104474		0.00443557	0.00209695	0.00567699	-0.00333093	0.00134835	0.00166253	0.00717493
	0.4676	-0.00479779	-0.00202903	-0.00243039	-0.0010275	-0.00453833	0.0013315	-0.00601544		0.00619169	-0.00187455	0.00606805	-0.0033863	0.000778006	-0.00235485	0.0108476
	0.5	-0.0062102	-0.000264774	0.00553489	0.00057847	-0.00721989	-0.00196159	-0.00892363		0.00679211	-0.00194526	0.00675033	-0.00686734	-0.000329861	0.000370924	0.0118395
Panel E	Time	Mouse 1	Mouse 2	Mouse 3	Mouse 4					Mouse 1	Mouse 2	Mouse 3	Mouse 4
	-0.2338	-0.000558735	-0.000507715	0.000387339	-0.000961222					-0.000636979	0.00102502	0.0028263	0.000765323
	-0.2004	-0.000704053	-0.00311452	-0.00362479	-0.000494695					0.000591918	-0.0013517	-0.00229141	-0.00209086
	-0.167	-0.00285087	0.00226752	-0.00389827	-0.001566					-0.00175349	-0.00211923	-0.00654659	-0.00087155
	-0.1336	-0.00145382	-0.000812375	-0.00031627	-0.00171003					-0.000375539	0.00042432	0.000429352	0.00100283
	-0.1002	-0.00147296	-0.000729403	0.000180958	-0.001311					-0.00135739	0.0013539	0.00965834	-0.000803801
	-0.0668	-0.00557217	2.27478e-06	0.00294056	-5.39621e-06					-0.00737469	-0.00410925	0.0195153	-0.00141994
	-0.0334	0.00272073	-0.0143072	0.0258968	-0.00309545					-0.0114415	-0.0134751	0.0606476	-0.0102156
	0	0.225041	0.19163	0.263926	0.212641					0.196356	0.185174	0.327943	0.200649
	0.0334	0.211544	0.149007	0.235184	0.179742					0.165238	0.145832	0.310999	0.163516
	0.0668	0.17271	0.111599	0.193351	0.135081					0.136078	0.108826	0.251456	0.124953
	0.1002	0.135205	0.0800774	0.160811	0.0991236					0.107944	0.0761399	0.2046	0.0875764
	0.1336	0.102495	0.0602385	0.131467	0.067116					0.0841304	0.0556549	0.167854	0.0648237
	0.167	0.0759829	0.0442735	0.10426	0.0463043					0.061182	0.0370464	0.117994	0.0457287
	0.2004	0.0532112	0.0287078	0.0833571	0.0321571					0.0486373	0.0278615	0.0988081	0.0292757
	0.2338	0.038035	0.0215729	0.0640471	0.0197975					0.0341145	0.0206098	0.0812368	0.0209227
	0.2672	0.0261939	0.0130488	0.0547745	0.0132884					0.0242814	0.0142403	0.0704413	0.0125741
	0.3006	0.0159895	0.0104721	0.0438984	0.0073929					0.017524	0.00924758	0.0514004	0.00866523
	0.334	0.0107694	0.00761582	0.0321996	0.00334684					0.00671869	0.00475663	0.0385819	0.00580281
	0.3674	0.00637492	0.00802976	0.0238993	-0.000975785					0.0069691	0.00274773	0.0308184	0.00161139
	0.4008	0.00242249	0.0058088	0.0175278	-0.00291333					0.00416993	-0.000131054	0.0267882	0.0016605
	0.4342	-0.00183075	0.00125436	0.0119696	-0.00584338					0.00332273	0.00105456	0.0165843	-0.00231034
	0.4676	-0.00263836	0.0040239	0.00690055	-0.00663035					0.000898427	-0.000983223	0.0104929	-0.000304461
	0.5	-0.00421604	-0.000746223	0.0057029	-0.00739404					-0.00149224	-0.000534848	0.00780745	-0.00134622
Panel G
Inset		Mouse 1	Mouse 2	Mouse 3	Mouse 4	Mouse 5	Mouse 6
	CNO	-0.0419458	0.0144717	-0.0631173	-0.0441958	-0.108488	-0.116221
	Control	0.00728509	-0.0029192	0.0152678	0.00612939	0.00835117	0.00533447
