# Supplementary material for: Inhibition gates supralinear Ca2+ signaling in Purkinje cell dendrites during practiced movements
Source: eLife. 2018 Aug 17;7:e36246. doi: 10.7554/eLife.36246 (PMC6120752; doi:10.7554/eLife.36246)
Supplement: Figure 4—source data 1. [file elife-36246-fig4-data1.xlsx]

## Sheet: Figure 3
Panel C		Control								CNO
	Bin	Mouse 1	Mouse 2	Mouse 3	Mouse 4	Mouse 5	Mouse 6	Mouse 7		Mouse 1	Mouse 2	Mouse 3	Mouse 4	Mouse 5	Mouse 6	Mouse 7
	0	0	0	0	0	0	0	0		0	0	0	0	0	0	0
	0.1	0.0143084	0.000655553	0.00820793	0.00327741	0.000119546	0.00322169	0.00927616		0.0010279	0.00101729	0.000131718	0.00352361	0.000765785	0.000819797	6.63658e-05
	0.2	0.0169399	0.00168571	0.0168719	0.0047217	0.000717274	0.00832271	0.0214416		0.00110132	0.00332316	0.000790306	0.00833921	0.00122526	0.0015485	6.63658e-05
	0.3	0.0216545	0.00515078	0.0269038	0.00833241	0.00370592	0.0126183	0.024635		0.00323054	0.00630722	0.00210748	0.0125675	0.00233564	0.00255048	0.000995487
	0.4	0.027959	0.0131111	0.0519836	0.0154983	0.0123132	0.020941	0.0348236		0.00756241	0.0155307	0.00461012	0.019556	0.00325459	0.0036739	0.00265463
	0.5	0.0341538	0.0320285	0.0679435	0.0301633	0.0299462	0.035103	0.044708		0.0134361	0.0269922	0.00908851	0.0300388	0.00670062	0.00847123	0.00491107
	0.6	0.0401294	0.0478554	0.0802554	0.0450505	0.0549313	0.0485267	0.0480535		0.021953	0.0341133	0.0169916	0.0460712	0.0143968	0.0173372	0.00909212
	0.7	0.0496135	0.0658363	0.0848153	0.0606599	0.0781231	0.0663132	0.0614355		0.0383994	0.0484232	0.0300316	0.0579927	0.0270705	0.028116	0.016326
	0.8	0.0600296	0.0845664	0.112175	0.0752694	0.0992827	0.0778576	0.0623479		0.0501468	0.051882	0.0403056	0.071588	0.0398208	0.0427509	0.0250199
	0.9	0.060523	0.0917775	0.0839033	0.0764915	0.105977	0.084301	0.0586983		0.062188	0.0606307	0.0471549	0.0788701	0.0609182	0.0566267	0.0350411
	1	0.0664437	0.082787	0.0752394	0.0752694	0.111297	0.0807437	0.0585462		0.0701909	0.0619193	0.0489989	0.0861522	0.079297	0.0663124	0.0396204
	1.1	0.0615098	0.0759506	0.0629275	0.0721031	0.0974298	0.0775891	0.0597628		0.0707783	0.0630722	0.0530822	0.0813953	0.0903243	0.0722635	0.0434696
	1.2	0.0587139	0.0674284	0.0542636	0.0617154	0.0822475	0.0685281	0.0501825		0.073348	0.0651746	0.0537408	0.0753759	0.0894437	0.0766358	0.0487125
	1.3	0.0547119	0.0551601	0.0433197	0.0567715	0.0675433	0.0608766	0.0439477		0.0721733	0.0590031	0.0500527	0.068681	0.092009	0.0728101	0.0495089
	1.4	0.047914	0.0513205	0.0323757	0.0511054	0.0561267	0.0543661	0.0375608		0.0596916	0.0542557	0.0482086	0.0576404	0.0778803	0.0632761	0.0524954
	1.5	0.0425963	0.0410189	0.0269038	0.0442173	0.0398087	0.046983	0.0383212		0.0610866	0.0475415	0.0496575	0.047833	0.066585	0.0608168	0.0532917
	1.6	0.0403487	0.0330586	0.0259918	0.0364404	0.0335923	0.0375193	0.0319343		0.0513216	0.043608	0.0474183	0.0415786	0.0551748	0.0513132	0.0507035
	1.7	0.033496	0.0297809	0.0250798	0.0333852	0.0231321	0.0293308	0.0291971		0.04721	0.0398101	0.043862	0.0333275	0.0454493	0.0467588	0.0500398
	1.8	0.030097	0.0236936	0.0132239	0.0271636	0.0182905	0.0268474	0.0281326		0.0381057	0.0356053	0.0401739	0.0272199	0.0397825	0.0408684	0.0469206
	1.9	0.0251083	0.0228507	0.0109439	0.0264415	0.0160191	0.0211424	0.0229623		0.0347283	0.0302475	0.0337197	0.0231384	0.0322778	0.034978	0.0439342
	2	0.0224768	0.0198539	0.0118559	0.0197756	0.0114764	0.0194644	0.0249392		0.0303231	0.0256358	0.0318757	0.018587	0.0256155	0.0303021	0.0404831
	2.1	0.0180911	0.0150777	0.00729594	0.0199978	0.0101614	0.0157729	0.020073		0.0279001	0.0254323	0.0297682	0.016561	0.0214037	0.0257173	0.0351075
	2.2	0.0161175	0.013673	0.00911993	0.0176092	0.00794979	0.0129539	0.0165754		0.0215859	0.0195999	0.0277924	0.0118041	0.0189532	0.0217094	0.0307274
	2.3	0.0142536	0.0127365	0.00729594	0.013554	0.00573819	0.0112088	0.0138382		0.017254	0.0194642	0.0239726	0.0115105	0.0142053	0.022256	0.031922
	2.4	0.01535	0.0103952	0.00820793	0.0141651	0.00508069	0.0101349	0.0130779		0.0165198	0.0173618	0.0225237	0.00927883	0.0117548	0.017489	0.0299973
	2.5	0.0117866	0.0104889	0.00547196	0.0128875	0.00388524	0.00852406	0.0126217		0.0132893	0.013903	0.022392	0.00786939	0.0106827	0.014726	0.0252854
	2.6	0.00953895	0.00842854	0.00775194	0.00894345	0.00322773	0.00778576	0.00958029		0.0129956	0.0125466	0.0192308	0.00731149	0.00953402	0.0134507	0.0232944
	2.7	0.0114577	0.00777299	0.00273598	0.00788801	0.00274955	0.00664474	0.00988443		0.0112335	0.0115293	0.0134352	0.00546159	0.00708351	0.0102019	0.0204407
	2.8	0.00860698	0.00880315	0.00227998	0.00849906	0.00310819	0.00570508	0.0101886		0.00748899	0.00983384	0.0188356	0.00469814	0.00677719	0.0102019	0.0184497
	2.9	0.00844252	0.00730474	0.00227998	0.00738807	0.00251046	0.00429559	0.00927616		0.00734214	0.00895219	0.0142255	0.00443387	0.0057051	0.00895704	0.017056
	3	0.00745573	0.00458887	0.00729594	0.00633263	0.00185296	0.00335593	0.00942822		0.00638767	0.00915565	0.0131718	0.00387597	0.0053222	0.0087445	0.016326
	3.1	0.00624966	0.00589998	0.00273598	0.00627708	0.001315	0.00328881	0.00897202		0.00646109	0.00752798	0.0138303	0.00352361	0.00425011	0.00759071	0.0148659
	3.2	0.00674305	0.00486983	0.00319197	0.00666593	0.000717274	0.00355729	0.00638686		0.00580029	0.00617158	0.0108008	0.00322997	0.0039055	0.00610293	0.0117467
	3.3	0.00493394	0.00552538	0.00227998	0.0040551	0.00083682	0.00295322	0.00623479		0.00425844	0.00556121	0.0108008	0.00264271	0.00313972	0.00610293	0.0114813
	3.4	0.00465983	0.00346507	0.00410397	0.0046106	0.00149432	0.00281898	0.00425791		0.00396476	0.00501865	0.0110643	0.00255462	0.00302485	0.00543495	0.0106849
	3.5	0.0043309	0.00299682	0.00273598	0.00361071	0.00113568	0.00174508	0.00471411		0.00352423	0.00542557	0.00987882	0.00214353	0.00245051	0.00412935	0.00862756
	3.6	0.00394715	0.00365237	0.00273598	0.0042773	0.000777047	0.00234915	0.00501825		0.00323054	0.00427263	0.00856164	0.00182053	0.00237393	0.00482769	0.00836209
	3.7	0.00455019	0.00271586	0.000911993	0.00299967	0.00083682	0.00248339	0.00532238		0.00271659	0.00522211	0.00882508	0.00140944	0.0024888	0.00391681	0.00829573
	3.8	0.00339894	0.00290317	0	0.00249972	0.000597729	0.00147661	0.0038017		0.00212922	0.00359444	0.0067176	0.00155626	0.0024888	0.00361318	0.00763207
	3.9	0.00334411	0.00299682	0.000455996	0.00311077	0.00041841	0.000805423	0.00577859		0.00227606	0.00427263	0.00645416	0.00132135	0.00160815	0.00276302	0.00763207
	4	0.00296036	0.00327777	0.00227998	0.00288857	0.000358637	0.00134237	0.00410584		0.00154185	0.00359444	0.00540042	0.00132135	0.00179959	0.00297556	0.00676931
	4.1	0.00339894	0.00224761	0.000455996	0.00238862	0.000119546	0.00161085	0.00288929		0.00249633	0.00305188	0.00856164	0.00108645	0.00195275	0.00279338	0.00491107
	4.2	0.00317965	0.00196666	0.000455996	0.00288857	0.000597729	0.00114102	0.00471411		0.00132159	0.00332316	0.00566386	0.000851539	0.00099552	0.0023683	0.00564109
	4.3	0.00268626	0.00159206	0	0.00127764	0.000358637	0.0010739	0.00395377		0.0020558	0.00318752	0.00474183	0.000616631	0.00118697	0.00279338	0.0050438
	4.4	0.00268626	0.00168571	0	0.00194423	0.000358637	0.00100678	0.00243309		0.00124816	0.00339098	0.00632244	0.000734085	0.00099552	0.00221649	0.00444651
	4.5	0.00252179	0.00206031	0.000911993	0.00166648	0.000358637	0.000335593	0.00304136		0.00110132	0.00244151	0.00540042	0.000557905	0.00153157	0.00182177	0.00365012
	4.6	0.00230251	0.00121746	0.000911993	0.00199978	0.000358637	0.0010739	0.00288929		0.00117474	0.00298406	0.00461012	0.000469814	0.00118697	0.00203431	0.0048447
	4.7	0.00246697	0.00168571	0.000455996	0.00138873	0.000119546	0.000604067	0.00304136		0.00132159	0.00169549	0.00461012	0.000528541	0.000727496	0.00179141	0.00365012
	4.8	0.00197358	0.00149841	0.000455996	0.00177758	0.000239091	0.00174508	0.00212895		0.00139501	0.00264496	0.00263435	0.000440451	0.000421182	0.00218612	0.00358375
	4.9	0.00191875	0.00121746	0	0.00138873	0.000298864	0.000872542	0.00152068		0.000734214	0.00217023	0.00421496	0.000411088	0.000918942	0.00136633	0.00371649
	5	0.00191875	0.00168571	0	0.00116654	0.000358637	0.000738305	0.0033455		0.00124816	0.00257714	0.00355638	0.000499178	0.000804074	0.00148778	0.00245553
