# Supplementary material for: Inhibition gates supralinear Ca2+ signaling in Purkinje cell dendrites during practiced movements
Source: eLife. 2018 Aug 17;7:e36246. doi: 10.7554/eLife.36246 (PMC6120752; doi:10.7554/eLife.36246)
Supplement: Figure 5—figure supplement 2—source data 1. [file elife-36246-fig5-figsupp2-data1.xlsx]

## Sheet: Figure 5 Supp 2
Panel B	Change in peak Ca2+, CF + PF
	(norm. to estimated sum)
	50 ms			75 ms			100 ms
	Control	w/ Light		Control	w/ Light		Control	w/ Light
	0.993985	1.34673		0.958181	1.13304		0.938046	1.13509
	0.809071	1.15855		1.20647	1.31012		1.03316	0.842357
	1.00744	1.14806		0.834248	1.30363		1.08676	0.980262
	0.989936	1.06614		0.802506	1.5765		1.43528	1.01554
	1.37183	1.08913		1.10264	0.993929		1.0461	1.03605
	0.985415	1.00851		1.0423	1.11476		1.03823	1.00753
	0.872571	0.889551		1.05677	0.879465		1.20724	0.889298
	0.978254	1.02771		1.06228	0.988259		1.16414	1.25131
	0.997471	1.01583		0.832737	0.830021		0.982966	1.17411
	0.972493	0.926814		1.16461	0.655725		1.16715	0.910243
	1.06419	1.35429		1.5266	1.05018		1.02016	1.2203
	0.994114	1.05183		1.09232	1.08302		0.855339	1.17841
	0.985977	1.01951		1.06763	0.970559		1.01011	1.10413
	0.839937	1.0796		0.884643	1.02605		1.22271	1.17871
	0.949542	1.03624		0.800072	1.05781		1.11063	1.18844
	1.07405	1.22618		1.00432	1.13276		0.807699	1.00181
	1.06568	1.37872		1.07509	1.12534		1.00697	1.02207
	1.20216	1.16744		1.3299	1.06724		1.00697	1.02207
	1.1898	1.26952		0.690862	1.05978		0.882842	1.18804
	1.03353	1.10587		0.810155	0.829751		1.0194	0.84094
	0.935958	1.07682		1.10547	1.21233		1.09156	0.846824
	1.01316	0.866917		1.34351	1.07243		1.07098	1.03785
	1.00113	1.18484		0.921224	1.1012		1.07098	1.03785
	0.962372	1.20749		0.945836	1.02063		0.909267	0.890323
	1.01263	1.13286		1.1521	0.94434		0.987772	0.954052
	1.06154	1.02909		1.16039	0.824922		0.989464	0.997391
	0.846938	0.844763		1.0482	1.21699		1.00145	0.989238
	1.1154	1.18562		1.00474	0.970578		0.982989	1.10488
	0.818511	1.01924		0.942021	1.13173		1.07887	0.98724
	0.958138	1.08716		0.871156	0.945804
	1.04575	1.06546		0.976597	0.971596
				1.07071	1.11898
				1.02743	0.966493
